# Supplementary material for: New insights into aflatoxin B1 mechanistic toxicology in cattle liver: an integrated approach using molecular docking and biological evaluation in CYP1A1 and CYP3A74 knockout BFH12 cell lines
Source: Arch Toxicol. 2024 Jun 4;98(9):3097–108. doi: 10.1007/s00204-024-03799-y (PMC11324698; doi:10.1007/s00204-024-03799-y)
Supplement: Supplementary file 3 — Supplementary file3 (XLSX 363 KB) [file 204_2024_3799_MOESM3_ESM.xlsx]

## Sheet: Foglio1
New insights into Aflatoxin B1 mechanistic toxicology in cattle liver: an integrated approach using molecular docking and biological evaluation in CYP1A1 and CYP3A74 knockout BFH12 cell lines
Silvia Ioria, Maija Lahtela-Kakkonenb, Caterina D’Onofrioa, Federica Maiettia, Greta Mucignata, Anisa Bardhic, Andrea Barbarossac, Anna Zaghinic, Marianna Paulettoa, Mauro Dacastoa & Mery Giantina,*
aDepartment of Comparative Biomedicine and Food Science, University of Padua, Viale dell’Università 16, Legnaro, 35020 Padua, Italy
bUniversity of Eastern Finland, School of Pharmacy, Yliopistonrinne 3, 70210 Kuopio, Finland
cDepartment of Veterinary Medical Sciences, Alma Mater Studiorum University of Bologna, Via Tolara di Sopra 50, Ozzano dell’Emilia, 40064 Bologna, Italy
*corresponding author at: Department of Comparative Biomedicine and Food Science, University of Padua, Viale dell’Università 16, Legnaro, 35020 Padua, Italy. E-mail address: mery.giantin@unipd.it (M. Giantin).

## Sheet: CYP1A1 KO vs CTL_Table1a
Supplementary Table 1a Differential expression analysis. The table reports the list of DEGs for the test CYP1A1 KO vs CTL upon AFB1 exposure. For each DEG, Ensembl ID, Entrez ID, gene description, gene name, log2 fold change (logFC), mean log count per millions (logCPM), nominal P value and false discovery rate (FDR) are reported.
AFB1 0.9 uM									AFB1 1.8 uM
ENSEMBL ID	ENTREZ ID	Gene description	Gene name	logFC	logCPM	PValue	FDR		ENSEMBL	ENTREZID	Gene description	Gene name	logFC	unshrunk.logFC	logCPM	PValue	FDR
ENSBTAG00000004602	508754	paired like homeodomain 1 [Source:VGNC Symbol;Acc:VGNC:32924]	PITX1	-5.30156	5.82839	1.76049e-12	1.7913e-08		ENSBTAG00000004602	508754	paired like homeodomain 1 [Source:VGNC Symbol;Acc:VGNC:32924]	PITX1	-5.27268	-5.286	5.82839	1.68221e-12	1.71165e-08
ENSBTAG00000046158	514076	complement factor B [Source:NCBI gene (formerly Entrezgene);Acc:514076]	CFB	-3.29363	5.89866	1.50189e-10	7.64087e-07		ENSBTAG00000046158	514076	complement factor B [Source:NCBI gene (formerly Entrezgene);Acc:514076]	CFB	-3.20594	-3.20864	5.89866	1.50339e-10	7.64852e-07
ENSBTAG00000014713	510102	retinoic acid receptor responder 1 [Source:VGNC Symbol;Acc:VGNC:33731]	RARRES1	-3.01056	7.01583	3.41236e-10	1.15736e-06		ENSBTAG00000001580	504256	calmegin [Source:VGNC Symbol;Acc:VGNC:27437]	CLGN	4.40957	4.41992	5.33779	5.34121e-10	1.65453e-06
ENSBTAG00000001580	504256	calmegin [Source:VGNC Symbol;Acc:VGNC:27437]	CLGN	4.60223	5.33779	4.74212e-10	1.20628e-06		ENSBTAG00000014713	510102	retinoic acid receptor responder 1 [Source:VGNC Symbol;Acc:VGNC:33731]	RARRES1	-2.87752	-2.87866	7.01583	6.50429e-10	1.65453e-06
ENSBTAG00000019961	614308	ATPase H+/K+ transporting subunit beta [Source:VGNC Symbol;Acc:VGNC:26298]	ATP4B	-2.38997	6.17431	1.67856e-09	2.96218e-06		ENSBTAG00000012897	506953	integrin subunit alpha 7 [Source:VGNC Symbol;Acc:VGNC:56212]	ITGA7	-2.28896	-2.29085	5.67662	2.24383e-09	4.56619e-06
ENSBTAG00000018824	509133	MIA SH3 domain ER export factor 3 [Source:VGNC Symbol;Acc:VGNC:31454]	MIA3	2.4235	6.02072	1.74674e-09	2.96218e-06		ENSBTAG00000000551	520500	survival motor neuron domain containing 1 [Source:VGNC Symbol;Acc:VGNC:35024]	SMNDC1	2.9704	2.97554	4.78182	5.63885e-09	6.29037e-06
ENSBTAG00000000559	505640	phospholipid transfer protein [Source:VGNC Symbol;Acc:VGNC:33055]	PLTP	-3.90804	7.08118	3.67072e-09	5.33565e-06		ENSBTAG00000012969	541161	dickkopf WNT signaling pathway inhibitor 2 [Source:VGNC Symbol;Acc:VGNC:28080]	DKK2	2.88816	2.88918	7.09833	6.20954e-09	6.29037e-06
ENSBTAG00000014320	617136	serum response factor binding protein 1 [Source:VGNC Symbol;Acc:VGNC:55312]	SRFBP1	2.41285	5.15265	4.43152e-09	5.63634e-06		ENSBTAG00000000559	505640	phospholipid transfer protein [Source:VGNC Symbol;Acc:VGNC:33055]	PLTP	-3.61197	-3.61346	7.08118	6.2293e-09	6.29037e-06
ENSBTAG00000012897	506953	integrin subunit alpha 7 [Source:VGNC Symbol;Acc:VGNC:56212]	ITGA7	-2.11961	5.67662	6.95235e-09	7.86002e-06		ENSBTAG00000014320	617136	serum response factor binding protein 1 [Source:VGNC Symbol;Acc:VGNC:55312]	SRFBP1	2.29616	2.29868	5.15265	7.01976e-09	6.29037e-06
ENSBTAG00000000551	520500	survival motor neuron domain containing 1 [Source:VGNC Symbol;Acc:VGNC:35024]	SMNDC1	2.92973	4.78182	1.08855e-08	9.7084e-06		ENSBTAG00000000236	287022	tyrosine 3-monooxygenase/tryptophan 5-monooxygenase activation protein zeta [Source:VGNC Symbol;Acc:VGNC:53885]	YWHAZ	4.20734	4.22056	4.9306	7.475e-09	6.29037e-06
ENSBTAG00000015022	768014	kinesin family member 2A [Source:VGNC Symbol;Acc:VGNC:30599]	KIF2A	3.18755	5.53175	1.14436e-08	9.7084e-06		ENSBTAG00000015022	768014	kinesin family member 2A [Source:VGNC Symbol;Acc:VGNC:30599]	KIF2A	3.26187	3.26603	5.53175	7.80311e-09	6.29037e-06
ENSBTAG00000012969	541161	dickkopf WNT signaling pathway inhibitor 2 [Source:VGNC Symbol;Acc:VGNC:28080]	DKK2	2.77807	7.09833	1.14497e-08	9.7084e-06		ENSBTAG00000012762	538535	chromosome 7 C5orf24 homolog [Source:VGNC Symbol;Acc:VGNC:52733]	C7H5orf24	3.11525	3.12244	4.52864	8.55549e-09	6.29037e-06
ENSBTAG00000007802	540648	BCL2 associated transcription factor 1 [Source:VGNC Symbol;Acc:VGNC:26451]	BCLAF1	2.04908	7.48646	1.35696e-08	9.9505e-06		ENSBTAG00000018824	509133	MIA SH3 domain ER export factor 3 [Source:VGNC Symbol;Acc:VGNC:31454]	MIA3	2.16765	2.16896	6.02072	8.64691e-09	6.29037e-06
ENSBTAG00000000236	287022	tyrosine 3-monooxygenase/tryptophan 5-monooxygenase activation protein zeta [Source:VGNC Symbol;Acc:VGNC:53885]	YWHAZ	3.89909	4.9306	1.3818e-08	9.9505e-06		ENSBTAG00000019975	521554	interleukin 7 receptor [Source:VGNC Symbol;Acc:VGNC:30170]	IL7R	3.36042	3.36738	4.57843	9.07347e-09	6.29037e-06
ENSBTAG00000004540	511298	negative regulator of ubiquitin like proteins 1 [Source:VGNC Symbol;Acc:VGNC:32314]	NUB1	2.26019	6.29585	1.4669e-08	9.9505e-06		ENSBTAG00000015981	540846	ETS variant transcription factor 1 [Source:VGNC Symbol;Acc:VGNC:28628]	ETV1	3.99409	4.01545	3.79725	9.27328e-09	6.29037e-06
ENSBTAG00000000827	536532	TAO kinase 1 [Source:VGNC Symbol;Acc:VGNC:35595]	TAOK1	2.49527	5.22058	1.63423e-08	1.03927e-05		ENSBTAG00000002948	539860	SET domain containing 2, histone lysine methyltransferase [Source:VGNC Symbol;Acc:VGNC:34493]	SETD2	3.14003	3.1482	4.42578	1.06983e-08	6.80346e-06
ENSBTAG00000019975	521554	interleukin 7 receptor [Source:VGNC Symbol;Acc:VGNC:30170]	IL7R	3.50073	4.57843	1.76753e-08	1.05792e-05		ENSBTAG00000007802	540648	BCL2 associated transcription factor 1 [Source:VGNC Symbol;Acc:VGNC:26451]	BCLAF1	2.05324	2.05366	7.48646	1.21849e-08	7.293e-06
ENSBTAG00000012762	538535	chromosome 7 C5orf24 homolog [Source:VGNC Symbol;Acc:VGNC:52733]	C7H5orf24	2.97595	4.52864	2.04274e-08	1.15472e-05		ENSBTAG00000015536	615304	copine 3 [Source:VGNC Symbol;Acc:VGNC:27660]	CPNE3	2.84827	2.85233	5.20095	1.38985e-08	7.85649e-06
ENSBTAG00000021107	537603	syntaxin binding protein 5 [Source:VGNC Symbol;Acc:VGNC:35448]	STXBP5	3.48437	4.1265	2.90696e-08	1.55675e-05		ENSBTAG00000014021	540792	ubinuclein 2 [Source:VGNC Symbol;Acc:VGNC:36611]	UBN2	2.59631	2.60401	3.91485	2.23596e-08	1.19742e-05
ENSBTAG00000027722	513707	importin 7 [Source:VGNC Symbol;Acc:VGNC:30244]	IPO7	2.63837	4.49995	3.17732e-08	1.61646e-05		ENSBTAG00000015794	522383	nestin [Source:VGNC Symbol;Acc:VGNC:32009]	NES	2.23423	2.23466	7.7518	2.72463e-08	1.32666e-05
ENSBTAG00000001209	509784	pleckstrin homology like domain family B member 2 [Source:VGNC Symbol;Acc:VGNC:32838]	PHLDB2	2.29287	5.67978	3.52669e-08	1.70339e-05		ENSBTAG00000021107	537603	syntaxin binding protein 5 [Source:VGNC Symbol;Acc:VGNC:35448]	STXBP5	3.64284	3.6595	4.1265	2.73807e-08	1.32666e-05
ENSBTAG00000050852	513990	C-X-C motif chemokine ligand 9 [Source:NCBI gene (formerly Entrezgene);Acc:513990]	CXCL9	2.26642	5.14126	3.68608e-08	1.70339e-05		ENSBTAG00000020426	#N/A	#N/A	#N/A	9.0754	1.44269e+08	3.10262	2.98577e-08	1.34706e-05
ENSBTAG00000012082	617439	TNF receptor superfamily member 12A [Source:VGNC Symbol;Acc:VGNC:36162]	TNFRSF12A	-1.79045	8.98455	3.85041e-08	1.70339e-05		ENSBTAG00000019961	614308	ATPase H+/K+ transporting subunit beta [Source:VGNC Symbol;Acc:VGNC:26298]	ATP4B	-1.95501	-1.95591	6.17431	3.08902e-08	1.34706e-05
ENSBTAG00000016649	615414	cyclin D2 [Source:VGNC Symbol;Acc:VGNC:26963]	CCND2	3.13686	3.64917	4.20658e-08	1.78341e-05		ENSBTAG00000000827	536532	TAO kinase 1 [Source:VGNC Symbol;Acc:VGNC:35595]	TAOK1	2.34574	2.34829	5.22058	3.17734e-08	1.34706e-05
ENSBTAG00000002949	616506	chromobox 1 [Source:VGNC Symbol;Acc:VGNC:26816]	CBX1	2.69683	4.61936	4.71895e-08	1.80629e-05		ENSBTAG00000031184	510972	cyclin dependent kinase inhibitor 1C [Source:VGNC Symbol;Acc:VGNC:27144]	CDKN1C	-2.76257	-2.77424	3.69526	3.60783e-08	1.46839e-05
ENSBTAG00000014958	282463	protein kinase cAMP-dependent type II regulatory subunit beta [Source:VGNC Symbol;Acc:VGNC:33326]	PRKAR2B	3.93139	3.91359	4.77543e-08	1.80629e-05		ENSBTAG00000011930	535152	DEAD-box helicase 54 [Source:VGNC Symbol;Acc:VGNC:27976]	DDX54	3.0972	3.1042	4.53069	4.18141e-08	1.63638e-05
ENSBTAG00000013919	282530	major histocompatibility complex, class II, DRB3 [Source:NCBI gene (formerly Entrezgene);Acc:282530]	0	-6.40109	2.90859	4.79309e-08	1.80629e-05		ENSBTAG00000001098	509423	pleckstrin homology domain containing A3 [Source:VGNC Symbol;Acc:VGNC:33005]	PLEKHA3	2.05303	2.05515	5.22465	4.53044e-08	1.70731e-05
ENSBTAG00000002948	539860	SET domain containing 2, histone lysine methyltransferase [Source:VGNC Symbol;Acc:VGNC:34493]	SETD2	2.80207	4.42578	5.0352e-08	1.82976e-05		ENSBTAG00000002949	616506	chromobox 1 [Source:VGNC Symbol;Acc:VGNC:26816]	CBX1	2.66855	2.67387	4.61936	5.31042e-08	1.8946e-05
ENSBTAG00000015536	615304	copine 3 [Source:VGNC Symbol;Acc:VGNC:27660]	CPNE3	2.54765	5.20095	5.91564e-08	2.07557e-05		ENSBTAG00000000061	514537	protocadherin 7 [Source:VGNC Symbol;Acc:VGNC:32621]	PCDH7	2.51198	2.51393	5.83593	5.67668e-08	1.8946e-05
ENSBTAG00000000986	530709	USH1 protein network component harmonin [Source:VGNC Symbol;Acc:VGNC:36704]	USH1C	-2.75514	4.44231	6.44659e-08	2.18647e-05		ENSBTAG00000015771	541050	YTH N6-methyladenosine RNA binding protein 2 [Source:VGNC Symbol;Acc:VGNC:37042]	YTHDF2	2.31715	2.32225	4.18933	5.70317e-08	1.8946e-05
ENSBTAG00000020426	#N/A	#N/A	#N/A	5.8482	3.10262	7.00287e-08	2.27876e-05		ENSBTAG00000027722	513707	importin 7 [Source:VGNC Symbol;Acc:VGNC:30244]	IPO7	2.46228	2.46685	4.49995	5.90087e-08	1.8946e-05
ENSBTAG00000012342	540637	LIM domain and actin binding 1 [Source:VGNC Symbol;Acc:VGNC:30886]	LIMA1	1.54935	7.80719	7.16661e-08	2.27876e-05		ENSBTAG00000012082	617439	TNF receptor superfamily member 12A [Source:VGNC Symbol;Acc:VGNC:36162]	TNFRSF12A	-1.74155	-1.74166	8.98455	5.95845e-08	1.8946e-05
ENSBTAG00000012152	615175	non-POU domain containing octamer binding [Source:VGNC Symbol;Acc:VGNC:32163]	NONO	4.00764	4.10476	7.74187e-08	2.38708e-05		ENSBTAG00000021204	534965	testin LIM domain protein [Source:VGNC Symbol;Acc:VGNC:35752]	TES	1.61804	1.61868	6.31906	6.33015e-08	1.9518e-05
ENSBTAG00000018093	508330	lysine methyltransferase 2A [Source:VGNC Symbol;Acc:VGNC:30690]	KMT2A	2.0952	5.10905	8.85136e-08	2.61772e-05		ENSBTAG00000014370	520056	neuropilin and tolloid like 2 [Source:VGNC Symbol;Acc:VGNC:32012]	NETO2	4.62033	4.7162	2.3992	7.41156e-08	2.21802e-05
ENSBTAG00000049842	#N/A	0	0	2.70303	4.29465	9.00444e-08	2.61772e-05		ENSBTAG00000004540	511298	negative regulator of ubiquitin like proteins 1 [Source:VGNC Symbol;Acc:VGNC:32314]	NUB1	2.02016	2.02117	6.29585	7.98975e-08	2.31751e-05
ENSBTAG00000021485	614807	chromosome 3 C1orf54 homolog [Source:VGNC Symbol;Acc:VGNC:52714]	C3H1orf54	-3.29741	3.30462	9.40274e-08	2.64652e-05		ENSBTAG00000001117	527956	ankyrin repeat domain 50 [Source:VGNC Symbol;Acc:VGNC:25934]	ANKRD50	2.52338	2.52948	4.06251	8.43823e-08	2.31751e-05
ENSBTAG00000026585	784844	elongin A [Source:VGNC Symbol;Acc:VGNC:56105]	ELOA	4.4008	3.91153	9.62372e-08	2.64652e-05		ENSBTAG00000007303	540966	RAD21 cohesin complex component [Source:VGNC Symbol;Acc:VGNC:33680]	RAD21	2.26646	2.2696	4.91291	8.65374e-08	2.31751e-05
ENSBTAG00000015692	506096	heat shock protein family A (Hsp70) member 4 like [Source:VGNC Symbol;Acc:VGNC:53906]	HSPA4L	2.85931	3.40232	1.04217e-07	2.79055e-05		ENSBTAG00000005230	525900	short stature homeobox 2 [Source:VGNC Symbol;Acc:VGNC:34606]	SHOX2	1.91272	1.9143	5.31483	8.65509e-08	2.31751e-05
ENSBTAG00000021204	534965	testin LIM domain protein [Source:VGNC Symbol;Acc:VGNC:35752]	TES	1.5763	6.31906	1.09339e-07	2.81031e-05		ENSBTAG00000013919	282530	major histocompatibility complex, class II, DRB3 [Source:NCBI gene (formerly Entrezgene);Acc:282530]	0	-6.15634	-6.39315	2.90859	9.17103e-08	2.35373e-05
ENSBTAG00000033190	785045	phosphoglucomutase 5 [Source:VGNC Symbol;Acc:VGNC:32797]	PGM5	3.53048	6.16039	1.10479e-07	2.81031e-05		ENSBTAG00000003697	540632	TAR DNA binding protein [Source:VGNC Symbol;Acc:VGNC:35603]	TARDBP	2.23785	2.24117	4.71795	9.25301e-08	2.35373e-05
ENSBTAG00000019839	510559	latent transforming growth factor beta binding protein 1 [Source:VGNC Symbol;Acc:VGNC:31071]	LTBP1	4.5777	3.5078	1.16671e-07	2.89544e-05		ENSBTAG00000021372	535746	septin 11 [Source:VGNC Symbol;Acc:VGNC:34451]	SEPTIN11	2.16982	2.17102	6.12197	9.66767e-08	2.39923e-05
ENSBTAG00000013793	507781	NEDD4 E3 ubiquitin protein ligase [Source:VGNC Symbol;Acc:VGNC:55128]	NEDD4	1.83659	5.59005	1.2261e-07	2.97038e-05		ENSBTAG00000004018	506348	diacylglycerol kinase alpha [Source:VGNC Symbol;Acc:VGNC:28024]	DGKA	-1.7507	-1.75107	7.3079	1.0235e-07	2.47955e-05
ENSBTAG00000011930	535152	DEAD-box helicase 54 [Source:VGNC Symbol;Acc:VGNC:27976]	DDX54	2.89466	4.53069	1.30492e-07	3.0878e-05		ENSBTAG00000020308	286870	eukaryotic translation initiation factor 4 gamma 2 [Source:VGNC Symbol;Acc:VGNC:28416]	EIF4G2	3.08178	3.08511	5.68082	1.13911e-07	2.66767e-05
ENSBTAG00000015794	522383	nestin [Source:VGNC Symbol;Acc:VGNC:32009]	NES	2.01284	7.7518	1.36525e-07	3.08999e-05		ENSBTAG00000021617	614589	zinc finger CCCH-type containing, antiviral 1 [Source:VGNC Symbol;Acc:VGNC:37111]	ZC3HAV1	2.66106	2.66549	4.81209	1.15359e-07	2.66767e-05
ENSBTAG00000008635	282485	sulfotransferase family, cytosolic, 1A, phenol-preferring, member 1 [Source:NCBI gene (formerly Entrezgene);Acc:282485]	SULT1A1	-2.21977	6.6094	1.38172e-07	3.08999e-05		ENSBTAG00000007979	767620	transportin 1 [Source:VGNC Symbol;Acc:VGNC:36199]	TNPO1	1.90263	1.90379	5.83907	1.18544e-07	2.68041e-05
ENSBTAG00000012497	538775	KH RNA binding domain containing, signal transduction associated 1 [Source:VGNC Symbol;Acc:VGNC:30540]	KHDRBS1	2.56759	5.07018	1.41132e-07	3.08999e-05		ENSBTAG00000010217	786496	zinc finger protein 318 [Source:VGNC Symbol;Acc:VGNC:37245]	ZNF318	2.45037	2.45677	3.95856	1.24201e-07	2.70851e-05
ENSBTAG00000000061	514537	protocadherin 7 [Source:VGNC Symbol;Acc:VGNC:32621]	PCDH7	2.36005	5.83593	1.42732e-07	3.08999e-05		ENSBTAG00000012290	533355	sodium channel epithelial 1 subunit beta [Source:VGNC Symbol;Acc:VGNC:34356]	SCNN1B	-5.72923	-5.96497	2.65562	1.25664e-07	2.70851e-05
ENSBTAG00000001303	539524	heat shock protein family B (small) member 8 [Source:VGNC Symbol;Acc:VGNC:53907]	HSPB8	-1.98421	6.15008	1.52859e-07	3.16768e-05		ENSBTAG00000054234	787811	galectin 7 [Source:NCBI gene (formerly Entrezgene);Acc:787811]	0	-3.72286	-3.74803	3.24167	1.27772e-07	2.70851e-05
ENSBTAG00000003665	100125264	nucleoporin 210 [Source:VGNC Symbol;Acc:VGNC:32356]	NUP210	-9.37552	2.90786	1.54256e-07	3.16768e-05		ENSBTAG00000001209	509784	pleckstrin homology like domain family B member 2 [Source:VGNC Symbol;Acc:VGNC:32838]	PHLDB2	2.08398	2.08555	5.67978	1.3135e-07	2.72753e-05
ENSBTAG00000003697	540632	TAR DNA binding protein [Source:VGNC Symbol;Acc:VGNC:35603]	TARDBP	2.19369	4.71795	1.5566e-07	3.16768e-05		ENSBTAG00000004413	530930	Rho related BTB domain containing 3 [Source:VGNC Symbol;Acc:VGNC:33946]	RHOBTB3	2.25191	2.25367	5.75861	1.43523e-07	2.92069e-05
ENSBTAG00000010217	786496	zinc finger protein 318 [Source:VGNC Symbol;Acc:VGNC:37245]	ZNF318	2.48488	3.95856	1.66031e-07	3.26645e-05		ENSBTAG00000014958	282463	protein kinase cAMP-dependent type II regulatory subunit beta [Source:VGNC Symbol;Acc:VGNC:33326]	PRKAR2B	3.69233	3.71332	3.91359	1.50021e-07	2.96322e-05
ENSBTAG00000004413	530930	Rho related BTB domain containing 3 [Source:VGNC Symbol;Acc:VGNC:33946]	RHOBTB3	2.22793	5.75861	1.66934e-07	3.26645e-05		ENSBTAG00000005431	540474	LIM and cysteine rich domains 1 [Source:VGNC Symbol;Acc:VGNC:30926]	LMCD1	2.4559	2.46619	3.59907	1.51591e-07	2.96322e-05
ENSBTAG00000054628	617469	prostate transmembrane protein, androgen induced 1 [Source:NCBI gene (formerly Entrezgene);Acc:617469]	PMEPA1	1.72178	6.86732	1.77848e-07	3.41434e-05		ENSBTAG00000000986	530709	USH1 protein network component harmonin [Source:VGNC Symbol;Acc:VGNC:36704]	USH1C	-2.58129	-2.58685	4.44231	1.54349e-07	2.96322e-05
ENSBTAG00000021617	614589	zinc finger CCCH-type containing, antiviral 1 [Source:VGNC Symbol;Acc:VGNC:37111]	ZC3HAV1	2.58531	4.81209	1.90508e-07	3.58967e-05		ENSBTAG00000012095	533444	gem nuclear organelle associated protein 5 [Source:VGNC Symbol;Acc:VGNC:29318]	GEMIN5	3.65562	3.6774	3.39806	1.65651e-07	3.07689e-05
ENSBTAG00000020308	286870	eukaryotic translation initiation factor 4 gamma 2 [Source:VGNC Symbol;Acc:VGNC:28416]	EIF4G2	2.95384	5.68082	1.96678e-07	3.63854e-05		ENSBTAG00000050852	513990	C-X-C motif chemokine ligand 9 [Source:NCBI gene (formerly Entrezgene);Acc:513990]	CXCL9	2.05533	2.05775	5.14126	1.67151e-07	3.07689e-05
ENSBTAG00000001104	540247	CKLF like MARVEL transmembrane domain containing 4 [Source:VGNC Symbol;Acc:VGNC:27484]	CMTM4	3.1755	2.32355	2.09071e-07	3.79874e-05		ENSBTAG00000016174	497013	nucleolin [Source:NCBI gene (formerly Entrezgene);Acc:497013]	NCL	1.87343	1.87366	8.11903	1.70663e-07	3.07689e-05
ENSBTAG00000014021	540792	ubinuclein 2 [Source:VGNC Symbol;Acc:VGNC:36611]	UBN2	2.23956	3.91485	2.14396e-07	3.82716e-05		ENSBTAG00000032477	536240	HECT domain E3 ubiquitin protein ligase 1 [Source:VGNC Symbol;Acc:VGNC:29800]	HECTD1	2.0152	2.01595	6.57779	1.72367e-07	3.07689e-05
ENSBTAG00000000363	519320	B double prime 1, subunit of RNA polymerase III transcription initiation factor IIIB [Source:VGNC Symbol;Acc:VGNC:26462]	BDP1	1.89828	6.60974	2.29317e-07	4.02293e-05		ENSBTAG00000008414	538494	zinc finger RNA binding protein [Source:VGNC Symbol;Acc:VGNC:37171]	ZFR	2.18005	2.18092	6.56901	1.84292e-07	3.23305e-05
ENSBTAG00000001098	509423	pleckstrin homology domain containing A3 [Source:VGNC Symbol;Acc:VGNC:33005]	PLEKHA3	1.85392	5.22465	2.35729e-07	4.06533e-05		ENSBTAG00000021020	541247	replication timing regulatory factor 1 [Source:VGNC Symbol;Acc:VGNC:33965]	RIF1	2.43316	2.43495	5.85201	1.8807e-07	3.24341e-05
ENSBTAG00000012290	533355	sodium channel epithelial 1 subunit beta [Source:VGNC Symbol;Acc:VGNC:34356]	SCNN1B	-4.21494	2.65562	2.5423e-07	4.29767e-05		ENSBTAG00000016542	529939	laminin subunit beta 3 [Source:VGNC Symbol;Acc:VGNC:30773]	LAMB3	-1.7994	-1.80003	6.7074	2.03726e-07	3.418e-05
ENSBTAG00000006586	507804	karyopherin subunit beta 1 [Source:VGNC Symbol;Acc:VGNC:30707]	KPNB1	2.0394	6.65321	2.57649e-07	4.29767e-05		ENSBTAG00000006667	281753	erythrocyte membrane protein band 4.1 [Source:VGNC Symbol;Acc:VGNC:28519]	EPB41	2.63714	2.6459	3.83928	2.05154e-07	3.418e-05
ENSBTAG00000002878	509942	chordin [Source:VGNC Symbol;Acc:VGNC:27316]	CHRD	-2.08165	5.27073	2.75572e-07	4.50923e-05		ENSBTAG00000054628	617469	prostate transmembrane protein, androgen induced 1 [Source:NCBI gene (formerly Entrezgene);Acc:617469]	PMEPA1	1.70107	1.70159	6.86732	2.09611e-07	3.418e-05
ENSBTAG00000019069	513812	synaptogyrin 2 [Source:NCBI gene (formerly Entrezgene);Acc:513812]	SYNGR2	-1.68641	6.59402	2.79196e-07	4.50923e-05		ENSBTAG00000000182	507484	serine peptidase inhibitor, Kunitz type 2 [Source:VGNC Symbol;Acc:VGNC:49973]	SPINT2	-2.70493	-2.71392	3.98455	2.14056e-07	3.418e-05
ENSBTAG00000050973	#N/A	0	0	3.00466	4.81346	3.01351e-07	4.75832e-05		ENSBTAG00000026585	784844	elongin A [Source:VGNC Symbol;Acc:VGNC:56105]	ELOA	3.86653	3.88625	3.91153	2.16893e-07	3.418e-05
ENSBTAG00000000182	507484	serine peptidase inhibitor, Kunitz type 2 [Source:VGNC Symbol;Acc:VGNC:49973]	SPINT2	-2.55689	3.98455	3.03971e-07	4.75832e-05		ENSBTAG00000019085	614017	signal recognition particle 54 [Source:VGNC Symbol;Acc:VGNC:35285]	SRP54	3.03143	3.05491	2.80058	2.18349e-07	3.418e-05
ENSBTAG00000017788	100137872	AKT serine/threonine kinase 3 [Source:VGNC Symbol;Acc:VGNC:25800]	AKT3	3.3781	2.69803	3.10797e-07	4.79146e-05		ENSBTAG00000012342	540637	LIM domain and actin binding 1 [Source:VGNC Symbol;Acc:VGNC:30886]	LIMA1	1.44932	1.44952	7.80719	2.2624e-07	3.44335e-05
ENSBTAG00000007303	540966	RAD21 cohesin complex component [Source:VGNC Symbol;Acc:VGNC:33680]	RAD21	2.07164	4.91291	3.2823e-07	4.98468e-05		ENSBTAG00000000988	507069	BRCA2 DNA repair associated [Source:VGNC Symbol;Acc:VGNC:26554]	BRCA2	2.14408	2.14583	5.49306	2.26736e-07	3.44335e-05
ENSBTAG00000006672	511763	synaptotagmin binding cytoplasmic RNA interacting protein [Source:VGNC Symbol;Acc:VGNC:35518]	SYNCRIP	1.79634	6.71026	3.38568e-07	5.06608e-05		ENSBTAG00000011368	510425	NOC3 like DNA replication regulator [Source:VGNC Symbol;Acc:VGNC:32147]	NOC3L	2.05474	2.05633	5.43556	2.41362e-07	3.61156e-05
ENSBTAG00000017809	533206	PDS5 cohesin associated factor A [Source:VGNC Symbol;Acc:VGNC:32717]	PDS5A	2.35962	4.09615	3.47207e-07	5.12005e-05		ENSBTAG00000003602	767928	recombination signal binding protein for immunoglobulin kappa J region [Source:VGNC Symbol;Acc:VGNC:53775]	RBPJ	1.56918	1.57002	5.9018	2.46813e-07	3.62595e-05
ENSBTAG00000004018	506348	diacylglycerol kinase alpha [Source:VGNC Symbol;Acc:VGNC:28024]	DGKA	-1.60933	7.3079	3.5254e-07	5.12442e-05		ENSBTAG00000018752	538774	SUZ12 polycomb repressive complex 2 subunit [Source:VGNC Symbol;Acc:VGNC:35493]	SUZ12	1.47535	1.47574	6.88344	2.53467e-07	3.62595e-05
ENSBTAG00000043567	#N/A	0	0	2.13024	13.7963	3.62774e-07	5.1989e-05		ENSBTAG00000050973	#N/A	0	0	2.87533	2.87974	4.81346	2.53469e-07	3.62595e-05
ENSBTAG00000009405	282102	transient receptor potential cation channel subfamily C member 4 [Source:VGNC Symbol;Acc:VGNC:36383]	TRPC4	2.46136	4.30769	3.87083e-07	5.36399e-05		ENSBTAG00000033190	785045	phosphoglucomutase 5 [Source:VGNC Symbol;Acc:VGNC:32797]	PGM5	3.34168	3.34519	6.16039	2.56579e-07	3.62595e-05
ENSBTAG00000050482	613265	zinc finger protein 148 [Source:NCBI gene (formerly Entrezgene);Acc:613265]	ZNF148	2.33015	3.83684	3.88871e-07	5.36399e-05		ENSBTAG00000020819	534353	YY1 transcription factor [Source:VGNC Symbol;Acc:VGNC:55896]	YY1	1.55858	1.55893	7.20903	2.60168e-07	3.62632e-05
ENSBTAG00000007979	767620	transportin 1 [Source:VGNC Symbol;Acc:VGNC:36199]	TNPO1	1.77165	5.83907	3.92687e-07	5.36399e-05		ENSBTAG00000018690	510621	RNA polymerase II associated protein 3 [Source:VGNC Symbol;Acc:VGNC:34100]	RPAP3	1.5645	1.565	6.5902	2.65664e-07	3.65288e-05
ENSBTAG00000012095	533444	gem nuclear organelle associated protein 5 [Source:VGNC Symbol;Acc:VGNC:29318]	GEMIN5	3.6542	3.39806	3.9538e-07	5.36399e-05		ENSBTAG00000000363	519320	B double prime 1, subunit of RNA polymerase III transcription initiation factor IIIB [Source:VGNC Symbol;Acc:VGNC:26462]	BDP1	1.86444	1.86509	6.60974	2.69718e-07	3.65917e-05
ENSBTAG00000009805	286876	craniofacial development protein 2 [Source:NCBI gene (formerly Entrezgene);Acc:286876]	CFDP2	3.07362	6.0712	4.2094e-07	5.38119e-05		ENSBTAG00000027390	513536	replication termination factor 2 [Source:VGNC Symbol;Acc:VGNC:34196]	RTF2	-1.57461	-1.57522	6.34847	2.93542e-07	3.92999e-05
ENSBTAG00000015981	540846	ETS variant transcription factor 1 [Source:VGNC Symbol;Acc:VGNC:28628]	ETV1	2.9208	3.79725	4.22013e-07	5.38119e-05		ENSBTAG00000021018	505564	KH-type splicing regulatory protein [Source:VGNC Symbol;Acc:VGNC:30545]	KHSRP	2.31592	2.31794	5.53996	2.97643e-07	3.93314e-05
ENSBTAG00000003602	767928	recombination signal binding protein for immunoglobulin kappa J region [Source:VGNC Symbol;Acc:VGNC:53775]	RBPJ	1.52891	5.9018	4.22228e-07	5.38119e-05		ENSBTAG00000014874	407149	forty-two-three domain containing 1 [Source:VGNC Symbol;Acc:VGNC:29164]	FYTTD1	3.16994	3.20197	2.4998	3.13883e-07	4.04584e-05
ENSBTAG00000020056	359712	collagen type XII alpha 1 chain [Source:VGNC Symbol;Acc:VGNC:52756]	COL12A1	2.73	4.91289	4.23091e-07	5.38119e-05		ENSBTAG00000006672	511763	synaptotagmin binding cytoplasmic RNA interacting protein [Source:VGNC Symbol;Acc:VGNC:35518]	SYNCRIP	1.7991	1.7997	6.71026	3.14124e-07	4.04584e-05
ENSBTAG00000002979	286865	phosphoinositide-3-kinase regulatory subunit 3 [Source:NCBI gene (formerly Entrezgene);Acc:286865]	PIK3R3	4.00173	3.38852	4.24618e-07	5.38119e-05		ENSBTAG00000018729	513692	spen family transcriptional repressor [Source:VGNC Symbol;Acc:VGNC:35204]	SPEN	2.14409	2.14619	5.33496	3.19517e-07	4.06385e-05
ENSBTAG00000019107	614517	growth arrest specific 7 [Source:VGNC Symbol;Acc:VGNC:29262]	GAS7	-5.05855	2.64585	4.2838e-07	5.38119e-05		ENSBTAG00000009805	286876	craniofacial development protein 2 [Source:NCBI gene (formerly Entrezgene);Acc:286876]	CFDP2	3.0788	3.08107	6.0712	3.24079e-07	4.07099e-05
ENSBTAG00000054234	787811	galectin 7 [Source:NCBI gene (formerly Entrezgene);Acc:787811]	0	-3.5916	3.24167	4.46667e-07	5.52687e-05		ENSBTAG00000014304	541164	transmembrane protein 47 [Source:VGNC Symbol;Acc:VGNC:36090]	TMEM47	1.65039	1.65087	6.69804	3.37784e-07	4.19141e-05
ENSBTAG00000021172	538614	interacts with SUPT6H, CTD assembly factor 1 [Source:VGNC Symbol;Acc:VGNC:30354]	IWS1	1.56261	5.80686	4.50841e-07	5.52687e-05		ENSBTAG00000005443	538742	MIER1 transcriptional regulator [Source:VGNC Symbol;Acc:VGNC:31469]	MIER1	2.16728	2.17096	4.6321	3.5577e-07	4.32166e-05
ENSBTAG00000006824	517850	adaptor protein, phosphotyrosine interacting with PH domain and leucine zipper 1 [Source:VGNC Symbol;Acc:VGNC:26040]	APPL1	1.56565	6.80217	4.92967e-07	5.97136e-05		ENSBTAG00000017788	100137872	AKT serine/threonine kinase 3 [Source:VGNC Symbol;Acc:VGNC:25800]	AKT3	3.73084	3.78705	2.69803	3.609e-07	4.32166e-05
ENSBTAG00000019437	521795	schlafen family member 11 [Source:NCBI gene (formerly Entrezgene);Acc:521795]	SLFN11	6.48588	2.11403	5.40045e-07	6.19936e-05		ENSBTAG00000001017	535342	STE20 like kinase [Source:VGNC Symbol;Acc:VGNC:34968]	SLK	2.24115	2.24292	5.6104	3.61024e-07	4.32166e-05
ENSBTAG00000014874	407149	forty-two-three domain containing 1 [Source:VGNC Symbol;Acc:VGNC:29164]	FYTTD1	3.15806	2.4998	5.40602e-07	6.19936e-05		ENSBTAG00000009218	518274	anillin actin binding protein [Source:VGNC Symbol;Acc:VGNC:25950]	ANLN	2.59386	2.59513	6.60858	3.6644e-07	4.33549e-05
ENSBTAG00000054750	#N/A	0	0	3.56745	1.64845	5.43602e-07	6.19936e-05		ENSBTAG00000047679	511258	deoxynucleotidyltransferase terminal interacting protein 2 [Source:VGNC Symbol;Acc:VGNC:28152]	DNTTIP2	1.84311	1.84376	6.58154	3.72207e-07	4.34139e-05
ENSBTAG00000016185	513095	ENAH actin regulator [Source:VGNC Symbol;Acc:VGNC:59333]	ENAH	2.6844	6.14132	5.44384e-07	6.19936e-05		ENSBTAG00000021172	538614	interacts with SUPT6H, CTD assembly factor 1 [Source:VGNC Symbol;Acc:VGNC:30354]	IWS1	1.57063	1.57155	5.80686	3.75472e-07	4.34139e-05
ENSBTAG00000018752	538774	SUZ12 polycomb repressive complex 2 subunit [Source:VGNC Symbol;Acc:VGNC:35493]	SUZ12	1.41926	6.88344	5.4645e-07	6.19936e-05		ENSBTAG00000012677	540393	Rho GTPase activating protein 12 [Source:VGNC Symbol;Acc:VGNC:26075]	ARHGAP12	1.59711	1.59816	5.6867	3.8217e-07	4.36919e-05
ENSBTAG00000007273	280705	transferrin [Source:NCBI gene (formerly Entrezgene);Acc:280705]	TF	-3.7797	3.21138	5.48347e-07	6.19936e-05		ENSBTAG00000015385	540232	CTD small phosphatase like 2 [Source:VGNC Symbol;Acc:VGNC:27792]	CTDSPL2	2.6407	2.64947	3.80472	3.93893e-07	4.38641e-05
ENSBTAG00000016174	497013	nucleolin [Source:NCBI gene (formerly Entrezgene);Acc:497013]	NCL	1.72954	8.11903	5.64195e-07	6.30845e-05		ENSBTAG00000012497	538775	KH RNA binding domain containing, signal transduction associated 1 [Source:VGNC Symbol;Acc:VGNC:30540]	KHDRBS1	2.33682	2.33964	5.07018	3.99547e-07	4.38641e-05
ENSBTAG00000021372	535746	septin 11 [Source:VGNC Symbol;Acc:VGNC:34451]	SEPTIN11	1.93502	6.12197	5.78401e-07	6.35873e-05		ENSBTAG00000016649	615414	cyclin D2 [Source:VGNC Symbol;Acc:VGNC:26963]	CCND2	2.5592	2.5687	3.64917	4.00278e-07	4.38641e-05
ENSBTAG00000005443	538742	MIER1 transcriptional regulator [Source:VGNC Symbol;Acc:VGNC:31469]	MIER1	2.08539	4.6321	5.8623e-07	6.35873e-05		ENSBTAG00000051845	618541	uncharacterized LOC618541 [Source:NCBI gene (formerly Entrezgene);Acc:618541]	0	2.0889	2.09162	4.82899	4.0109e-07	4.38641e-05
ENSBTAG00000015316	614028	nucleophosmin 1 [Source:NCBI gene (formerly Entrezgene);Acc:614028]	NPM1	2.36717	6.00621	5.9185e-07	6.35873e-05		ENSBTAG00000010350	107131223	ubiquitin specific peptidase 53 [Source:VGNC Symbol;Acc:VGNC:58425]	USP53	3.37664	3.38932	3.9815	4.05231e-07	4.38641e-05
ENSBTAG00000005339	281572	vascular endothelial growth factor A [Source:VGNC Symbol;Acc:VGNC:55927]	VEGFA	2.6234	3.24585	5.9369e-07	6.35873e-05		ENSBTAG00000024387	535496	patatin like phospholipase domain containing 8 [Source:VGNC Symbol;Acc:VGNC:33095]	PNPLA8	2.86816	2.89225	2.63338	4.09605e-07	4.38709e-05
ENSBTAG00000003322	522221	tubulin tyrosine ligase like 7 [Source:VGNC Symbol;Acc:VGNC:36495]	TTLL7	3.71547	2.61763	6.12701e-07	6.44092e-05		ENSBTAG00000000201	519526	listerin E3 ubiquitin protein ligase 1 [Source:VGNC Symbol;Acc:VGNC:31078]	LTN1	2.50096	2.51133	3.22084	4.15918e-07	4.40829e-05
ENSBTAG00000011538	527883	kinesin family member 1A [Source:VGNC Symbol;Acc:VGNC:30590]	KIF1A	-7.17987	5.28019	6.17888e-07	6.44092e-05		ENSBTAG00000047027	100296216	chromosome 10 C14orf119 homolog [Source:VGNC Symbol;Acc:VGNC:52608]	C10H14orf119	4.37004	4.44186	2.62411	4.2118e-07	4.41804e-05
ENSBTAG00000017537	282021	prostaglandin I2 synthase [Source:VGNC Symbol;Acc:VGNC:33509]	PTGIS	-2.80243	2.66331	6.20354e-07	6.44092e-05		ENSBTAG00000034436	100138102	3-phosphoinositide dependent protein kinase 1 [Source:NCBI gene (formerly Entrezgene);Acc:100138102]	PDPK1	2.65156	2.66556	3.26948	4.30203e-07	4.46665e-05
ENSBTAG00000027390	513536	replication termination factor 2 [Source:VGNC Symbol;Acc:VGNC:34196]	RTF2	-1.49729	6.34847	7.2311e-07	7.43196e-05		ENSBTAG00000002878	509942	chordin [Source:VGNC Symbol;Acc:VGNC:27316]	CHRD	-1.98397	-1.98576	5.27073	4.56391e-07	4.69068e-05
ENSBTAG00000051486	530547	ubiquitin fold modifier 1 [Source:NCBI gene (formerly Entrezgene);Acc:530547]	UFM1	2.24345	4.96365	7.45588e-07	7.56209e-05		ENSBTAG00000023601	617937	RNA polymerase I subunit G [Source:VGNC Symbol;Acc:VGNC:27030]	POLR1G	2.2335	2.23565	5.27971	4.74674e-07	4.80551e-05
ENSBTAG00000018690	510621	RNA polymerase II associated protein 3 [Source:VGNC Symbol;Acc:VGNC:34100]	RPAP3	1.48081	6.5902	7.50635e-07	7.56209e-05		ENSBTAG00000006586	507804	karyopherin subunit beta 1 [Source:VGNC Symbol;Acc:VGNC:30707]	KPNB1	1.94984	1.95055	6.65321	4.78091e-07	4.80551e-05
ENSBTAG00000019036	530550	Rho GTPase activating protein 28 [Source:VGNC Symbol;Acc:VGNC:26086]	ARHGAP28	3.13952	3.84448	7.59099e-07	7.57239e-05		ENSBTAG00000030259	524957	Ras protein specific guanine nucleotide releasing factor 2 [Source:VGNC Symbol;Acc:VGNC:33746]	RASGRF2	5.95943	6.23598	2.54251	4.81732e-07	4.80551e-05
ENSBTAG00000010313	510826	DExD-box helicase 52 [Source:VGNC Symbol;Acc:VGNC:27975]	DDX52	2.12012	6.97066	7.94534e-07	7.81359e-05		ENSBTAG00000010063	100848816	lysine demethylase 3B [Source:VGNC Symbol;Acc:VGNC:30526]	KDM3B	4.64209	4.78361	2.03194	5.21995e-07	5.1566e-05
ENSBTAG00000014304	541164	transmembrane protein 47 [Source:VGNC Symbol;Acc:VGNC:36090]	TMEM47	1.57667	6.69804	7.98637e-07	7.81359e-05		ENSBTAG00000008635	282485	sulfotransferase family, cytosolic, 1A, phenol-preferring, member 1 [Source:NCBI gene (formerly Entrezgene);Acc:282485]	SULT1A1	-2.02115	-2.02192	6.6094	5.27072e-07	5.15669e-05
ENSBTAG00000021018	505564	KH-type splicing regulatory protein [Source:VGNC Symbol;Acc:VGNC:30545]	KHSRP	2.17081	5.53996	8.14969e-07	7.89744e-05		ENSBTAG00000002979	286865	phosphoinositide-3-kinase regulatory subunit 3 [Source:NCBI gene (formerly Entrezgene);Acc:286865]	PIK3R3	4.02233	4.05823	3.38852	5.47495e-07	5.26743e-05
ENSBTAG00000000139	532622	lysine methyltransferase 5A [Source:VGNC Symbol;Acc:VGNC:53910]	KMT5A	3.40956	3.35624	8.25503e-07	7.92405e-05		ENSBTAG00000018812	404165	NOP56 ribonucleoprotein [Source:VGNC Symbol;Acc:VGNC:32169]	NOP56	1.36882	1.36899	7.8728	5.53355e-07	5.26743e-05
ENSBTAG00000010439	539700	A-kinase anchoring protein 8 like [Source:VGNC Symbol;Acc:VGNC:25790]	AKAP8L	3.15156	3.67428	8.7052e-07	8.27808e-05		ENSBTAG00000002280	514261	kinesin family member 5B [Source:VGNC Symbol;Acc:VGNC:30606]	KIF5B	1.86654	1.86676	8.27043	5.53921e-07	5.26743e-05
ENSBTAG00000003438	509462	zinc finger and BTB domain containing 43 [Source:VGNC Symbol;Acc:VGNC:37082]	ZBTB43	3.66088	3.20341	8.92926e-07	8.41252e-05		ENSBTAG00000039770	507575	CCAAT enhancer binding protein zeta [Source:VGNC Symbol;Acc:VGNC:27164]	CEBPZ	1.87651	1.87689	7.38099	5.65818e-07	5.33074e-05
ENSBTAG00000002147	504900	protein phosphatase 4 regulatory subunit 2 [Source:VGNC Symbol;Acc:VGNC:33270]	PPP4R2	1.96953	5.3583	9.19696e-07	8.58524e-05		ENSBTAG00000003322	522221	tubulin tyrosine ligase like 7 [Source:VGNC Symbol;Acc:VGNC:36495]	TTLL7	4.08389	4.15499	2.61763	5.81608e-07	5.38689e-05
ENSBTAG00000007639	507675	SDA1 domain containing 1 [Source:VGNC Symbol;Acc:VGNC:34377]	SDAD1	1.61322	5.88683	9.32281e-07	8.6236e-05		ENSBTAG00000019839	510559	latent transforming growth factor beta binding protein 1 [Source:VGNC Symbol;Acc:VGNC:31071]	LTBP1	4.56336	4.62781	3.5078	5.82367e-07	5.38689e-05
ENSBTAG00000004894	505013	GTPase, IMAP family member 5 [Source:NCBI gene (formerly Entrezgene);Acc:505013]	GIMAP5	-6.52235	2.29769	9.58243e-07	8.78389e-05		ENSBTAG00000012881	444858	eukaryotic translation initiation factor 4 gamma 1 [Source:VGNC Symbol;Acc:VGNC:28415]	EIF4G1	1.66761	1.66812	6.78994	6.03664e-07	5.53359e-05
ENSBTAG00000011765	338472	GABA type A receptor associated protein like 1 [Source:VGNC Symbol;Acc:VGNC:56201]	GABARAPL1	1.64349	7.4113	9.91801e-07	9.01033e-05		ENSBTAG00000015316	614028	nucleophosmin 1 [Source:NCBI gene (formerly Entrezgene);Acc:614028]	NPM1	2.34422	2.34575	6.00621	6.29637e-07	5.69365e-05
ENSBTAG00000004850	540719	karyopherin subunit alpha 3 [Source:VGNC Symbol;Acc:VGNC:30702]	KPNA3	2.07128	5.69752	1.01034e-06	9.05779e-05		ENSBTAG00000012152	615175	non-POU domain containing octamer binding [Source:VGNC Symbol;Acc:VGNC:32163]	NONO	3.19244	3.20341	4.10476	6.32317e-07	5.69365e-05
ENSBTAG00000016198	112446776	E1A binding protein p300 [Source:VGNC Symbol;Acc:VGNC:57349]	EP300	2.52434	4.20436	1.01483e-06	9.05779e-05		ENSBTAG00000010732	527590	matrix metallopeptidase 23 [Source:VGNC Symbol;Acc:VGNC:53594]	MMP23	-1.98483	-1.986	6.11546	6.65246e-07	5.93762e-05
ENSBTAG00000000988	507069	BRCA2 DNA repair associated [Source:VGNC Symbol;Acc:VGNC:26554]	BRCA2	1.95825	5.49306	1.03697e-06	9.17494e-05		ENSBTAG00000049341	786476	SERTA domain containing 2 [Source:NCBI gene (formerly Entrezgene);Acc:786476]	SERTAD2	1.57963	1.58034	5.96153	6.85551e-07	6.00018e-05
ENSBTAG00000009218	518274	anillin actin binding protein [Source:VGNC Symbol;Acc:VGNC:25950]	ANLN	2.38276	6.60858	1.05235e-06	9.18927e-05		ENSBTAG00000018093	508330	lysine methyltransferase 2A [Source:VGNC Symbol;Acc:VGNC:30690]	KMT2A	1.80635	1.80819	5.10905	6.87268e-07	6.00018e-05
ENSBTAG00000002341	540313	ETS proto-oncogene 1, transcription factor [Source:VGNC Symbol;Acc:VGNC:28626]	ETS1	2.43274	5.25835	1.05665e-06	9.18927e-05		ENSBTAG00000001939	511202	SECIS binding protein 2 [Source:VGNC Symbol;Acc:VGNC:34419]	SECISBP2	2.52904	2.53769	3.63608	6.89947e-07	6.00018e-05
ENSBTAG00000020735	525143	SMG1 nonsense mediated mRNA decay associated PI3K related kinase [Source:VGNC Symbol;Acc:VGNC:35010]	SMG1	2.21133	4.783	1.07949e-06	9.3083e-05		ENSBTAG00000007441	508557	SEC23 interacting protein [Source:VGNC Symbol;Acc:VGNC:34412]	SEC23IP	2.21648	2.22212	3.96549	7.02866e-07	6.06073e-05
ENSBTAG00000000458	519789	dynein cytoplasmic 1 light intermediate chain 2 [Source:VGNC Symbol;Acc:VGNC:28273]	DYNC1LI2	1.90311	4.55262	1.11597e-06	9.53057e-05		ENSBTAG00000013060	104968536	IQ motif containing GTPase activating protein 1 [Source:VGNC Symbol;Acc:VGNC:30258]	IQGAP1	3.55156	3.55569	5.89425	7.21668e-07	6.17056e-05
ENSBTAG00000030836	510136	zinc finger and BTB domain containing 21 [Source:VGNC Symbol;Acc:VGNC:37066]	ZBTB21	2.65981	4.81608	1.124e-06	9.53057e-05		ENSBTAG00000006556	535533	COPI coat complex subunit beta 1 [Source:VGNC Symbol;Acc:VGNC:27593]	COPB1	2.29989	2.30284	5.11781	7.76694e-07	6.58572e-05
ENSBTAG00000000998	524456	solute carrier family 39 member 6 [Source:VGNC Symbol;Acc:VGNC:34866]	SLC39A6	4.48189	2.44406	1.14577e-06	9.63489e-05		ENSBTAG00000050482	613265	zinc finger protein 148 [Source:NCBI gene (formerly Entrezgene);Acc:613265]	ZNF148	2.22322	2.23004	3.83684	7.87013e-07	6.60692e-05
ENSBTAG00000014205	100139910	protein kinase cAMP-dependent type II regulatory subunit alpha [Source:VGNC Symbol;Acc:VGNC:33325]	PRKAR2A	2.60029	4.72667	1.16475e-06	9.71421e-05		ENSBTAG00000004894	505013	GTPase, IMAP family member 5 [Source:NCBI gene (formerly Entrezgene);Acc:505013]	GIMAP5	-8.24525	-1.44269e+08	2.29769	7.97156e-07	6.60692e-05
ENSBTAG00000005865	538094	mitogen-activated protein kinase 6 [Source:VGNC Symbol;Acc:VGNC:31221]	MAPK6	1.80124	5.96041	1.18672e-06	9.71576e-05		ENSBTAG00000010803	532324	CHM like Rab escort protein [Source:VGNC Symbol;Acc:VGNC:27298]	CHML	3.55048	3.58546	2.58799	7.98675e-07	6.60692e-05
ENSBTAG00000020041	540987	family with sequence similarity 13 member B [Source:VGNC Symbol;Acc:VGNC:55222]	FAM13B	3.04007	3.1559	1.19579e-06	9.71576e-05		ENSBTAG00000010313	510826	DExD-box helicase 52 [Source:VGNC Symbol;Acc:VGNC:27975]	DDX52	2.093	2.09358	6.97066	8.27479e-07	6.79e-05
ENSBTAG00000020014	785182	centrosomal protein 104 [Source:VGNC Symbol;Acc:VGNC:27189]	CEP104	2.41666	4.10348	1.21928e-06	9.71576e-05		ENSBTAG00000006246	538885	chromobox 5 [Source:VGNC Symbol;Acc:VGNC:26818]	CBX5	2.40067	2.40166	6.73977	8.54927e-07	6.93693e-05
ENSBTAG00000000088	281614	activated leukocyte cell adhesion molecule [Source:VGNC Symbol;Acc:VGNC:25805]	ALCAM	3.2633	3.44656	1.22029e-06	9.71576e-05		ENSBTAG00000013925	#N/A	Kin17 DNA and RNA binding protein [Source:VGNC Symbol;Acc:VGNC:56190]	KIN	1.70386	1.70607	4.65069	8.59021e-07	6.93693e-05
ENSBTAG00000016542	529939	laminin subunit beta 3 [Source:VGNC Symbol;Acc:VGNC:30773]	LAMB3	-1.57904	6.7074	1.2241e-06	9.71576e-05		ENSBTAG00000005339	281572	vascular endothelial growth factor A [Source:VGNC Symbol;Acc:VGNC:55927]	VEGFA	2.66043	2.67662	3.24585	8.90985e-07	7.1384e-05
ENSBTAG00000053726	782397	eukaryotic translation initiation factor 4E binding protein 2 [Source:NCBI gene (formerly Entrezgene);Acc:782397]	EIF4EBP2	3.14231	5.02395	1.22963e-06	9.71576e-05		ENSBTAG00000003438	509462	zinc finger and BTB domain containing 43 [Source:VGNC Symbol;Acc:VGNC:37082]	ZBTB43	3.35479	3.37535	3.20341	9.32894e-07	7.29154e-05
ENSBTAG00000006734	533796	BICD cargo adaptor 1 [Source:VGNC Symbol;Acc:VGNC:26491]	BICD1	4.06957	1.89374	1.2378e-06	9.71576e-05		ENSBTAG00000047330	281760	fatty acid binding protein 5 [Source:NCBI gene (formerly Entrezgene);Acc:281760]	FABP5	1.98144	1.98323	5.17116	9.34745e-07	7.29154e-05
ENSBTAG00000010935	540187	EMAP like 4 [Source:VGNC Symbol;Acc:VGNC:28478]	EML4	2.84925	3.31417	1.24193e-06	9.71576e-05		ENSBTAG00000010439	539700	A-kinase anchoring protein 8 like [Source:VGNC Symbol;Acc:VGNC:25790]	AKAP8L	2.97153	2.98295	3.67428	9.37064e-07	7.29154e-05
ENSBTAG00000023601	617937	RNA polymerase I subunit G [Source:VGNC Symbol;Acc:VGNC:27030]	POLR1G	2.12208	5.27971	1.25087e-06	9.71576e-05		ENSBTAG00000016198	112446776	E1A binding protein p300 [Source:VGNC Symbol;Acc:VGNC:57349]	EP300	2.51855	2.52476	4.20436	9.44698e-07	7.29154e-05
ENSBTAG00000013925	#N/A	Kin17 DNA and RNA binding protein [Source:VGNC Symbol;Acc:VGNC:56190]	KIN	1.68914	4.65069	1.27538e-06	9.83105e-05		ENSBTAG00000026966	615588	Ras association domain family member 9 [Source:VGNC Symbol;Acc:VGNC:33765]	RASSF9	2.46904	2.48051	3.1191	9.4593e-07	7.29154e-05
ENSBTAG00000001517	506480	keratin 18 [Source:VGNC Symbol;Acc:VGNC:30719]	KRT18	-5.4701	5.19059	1.33309e-06	0.000101986		ENSBTAG00000011765	338472	GABA type A receptor associated protein like 1 [Source:VGNC Symbol;Acc:VGNC:56201]	GABARAPL1	1.64432	1.64466	7.4113	9.7568e-07	7.46432e-05
ENSBTAG00000019854	514991	ATP binding cassette subfamily E member 1 [Source:VGNC Symbol;Acc:VGNC:25479]	ABCE1	2.18069	4.26332	1.35986e-06	0.000103258		ENSBTAG00000020056	359712	collagen type XII alpha 1 chain [Source:VGNC Symbol;Acc:VGNC:52756]	COL12A1	2.55433	2.55843	4.91289	1.00894e-06	7.66119e-05
ENSBTAG00000032477	536240	HECT domain E3 ubiquitin protein ligase 1 [Source:VGNC Symbol;Acc:VGNC:29800]	HECTD1	1.75679	6.57779	1.38422e-06	0.000104329		ENSBTAG00000008816	538617	tripartite motif containing 2 [Source:VGNC Symbol;Acc:VGNC:36318]	TRIM2	2.29907	2.30116	5.36267	1.02737e-06	7.66454e-05
ENSBTAG00000019937	514870	WD repeat domain 3 [Source:VGNC Symbol;Acc:VGNC:36890]	WDR3	2.0353	3.71686	1.39817e-06	0.000104591		ENSBTAG00000004850	540719	karyopherin subunit alpha 3 [Source:VGNC Symbol;Acc:VGNC:30702]	KPNA3	2.0823	2.084	5.69752	1.02803e-06	7.66454e-05
ENSBTAG00000002280	514261	kinesin family member 5B [Source:VGNC Symbol;Acc:VGNC:30606]	KIF5B	1.74789	8.27043	1.41075e-06	0.000104591		ENSBTAG00000012405	787112	platelet endothelial aggregation receptor 1 [Source:VGNC Symbol;Acc:VGNC:32734]	PEAR1	2.0568	2.05923	5.05012	1.03221e-06	7.66454e-05
ENSBTAG00000001017	535342	STE20 like kinase [Source:VGNC Symbol;Acc:VGNC:34968]	SLK	2.05398	5.6104	1.42721e-06	0.000104591		ENSBTAG00000049842	#N/A	0	0	2.2839	2.28947	4.29465	1.04098e-06	7.66454e-05
ENSBTAG00000047027	100296216	chromosome 10 C14orf119 homolog [Source:VGNC Symbol;Acc:VGNC:52608]	C10H14orf119	3.86708	2.62411	1.43667e-06	0.000104591		ENSBTAG00000002048	533590	protein tyrosine phosphatase non-receptor type 11 [Source:VGNC Symbol;Acc:VGNC:33530]	PTPN11	2.50168	2.50257	6.96946	1.04705e-06	7.66454e-05
ENSBTAG00000044010	#N/A	embigin [Source:HGNC Symbol;Acc:HGNC:30465]	EMB	2.70568	2.74506	1.44586e-06	0.000104591		ENSBTAG00000013905	281729	structural maintenance of chromosomes 3 [Source:VGNC Symbol;Acc:VGNC:35000]	SMC3	1.50952	1.50987	7.15939	1.05935e-06	7.69918e-05
ENSBTAG00000013060	104968536	IQ motif containing GTPase activating protein 1 [Source:VGNC Symbol;Acc:VGNC:30258]	IQGAP1	3.2964	5.89425	1.44937e-06	0.000104591		ENSBTAG00000000697	540208	ribosomal RNA processing 8 [Source:VGNC Symbol;Acc:VGNC:34171]	RRP8	2.49683	2.50624	3.45015	1.07569e-06	7.76254e-05
ENSBTAG00000010732	527590	matrix metallopeptidase 23 [Source:VGNC Symbol;Acc:VGNC:53594]	MMP23	-1.8638	6.11546	1.46941e-06	0.000105291		ENSBTAG00000014558	781917	DExD-box helicase 21 [Source:VGNC Symbol;Acc:VGNC:97259]	DDX21	2.20338	2.20353	9.01245	1.08486e-06	7.77355e-05
ENSBTAG00000037510	615733	GTPase, IMAP family member 1 [Source:NCBI gene (formerly Entrezgene);Acc:615733]	0	3.10736	2.75906	1.48466e-06	0.000105639		ENSBTAG00000011789	507148	RE1 silencing transcription factor B [Source:VGNC Symbol;Acc:VGNC:96876]	RESTB	2.15952	2.1634	4.53818	1.10987e-06	7.8565e-05
ENSBTAG00000006744	540861	transmembrane protein 131 [Source:VGNC Symbol;Acc:VGNC:35964]	TMEM131	2.5912	5.34602	1.52107e-06	0.000106027		ENSBTAG00000006744	540861	transmembrane protein 131 [Source:VGNC Symbol;Acc:VGNC:35964]	TMEM131	2.6663	2.66955	5.34602	1.11689e-06	7.8565e-05
ENSBTAG00000005431	540474	LIM and cysteine rich domains 1 [Source:VGNC Symbol;Acc:VGNC:30926]	LMCD1	2.00842	3.59907	1.54206e-06	0.000106027		ENSBTAG00000015692	506096	heat shock protein family A (Hsp70) member 4 like [Source:VGNC Symbol;Acc:VGNC:53906]	HSPA4L	2.26552	2.27396	3.40232	1.1196e-06	7.8565e-05
ENSBTAG00000006828	535383	Rap guanine nucleotide exchange factor 3 [Source:VGNC Symbol;Acc:VGNC:33724]	RAPGEF3	-2.27178	4.43706	1.54366e-06	0.000106027		ENSBTAG00000005865	538094	mitogen-activated protein kinase 6 [Source:VGNC Symbol;Acc:VGNC:31221]	MAPK6	1.77861	1.77953	5.96041	1.1508e-06	7.97933e-05
ENSBTAG00000020421	514989	SPT16 homolog, facilitates chromatin remodeling subunit [Source:VGNC Symbol;Acc:VGNC:35478]	SUPT16H	1.46348	7.14151	1.54863e-06	0.000106027		ENSBTAG00000010030	#N/A	EPH receptor A4 [Source:VGNC Symbol;Acc:VGNC:56106]	EPHA4	3.07314	3.09396	2.89622	1.15279e-06	7.97933e-05
ENSBTAG00000006556	535533	COPI coat complex subunit beta 1 [Source:VGNC Symbol;Acc:VGNC:27593]	COPB1	2.17066	5.11781	1.56005e-06	0.000106027		ENSBTAG00000016726	541135	kinesin family member 15 [Source:VGNC Symbol;Acc:VGNC:30584]	KIF15	1.96621	1.96907	4.63973	1.16544e-06	8.0124e-05
ENSBTAG00000014370	520056	neuropilin and tolloid like 2 [Source:VGNC Symbol;Acc:VGNC:32012]	NETO2	3.40291	2.3992	1.56031e-06	0.000106027		ENSBTAG00000005441	782132	zinc finger matrin-type 2 [Source:VGNC Symbol;Acc:VGNC:37191]	ZMAT2	1.34928	1.34962	7.04053	1.17851e-06	8.04786e-05
ENSBTAG00000018729	513692	spen family transcriptional repressor [Source:VGNC Symbol;Acc:VGNC:35204]	SPEN	1.92851	5.33496	1.56305e-06	0.000106027		ENSBTAG00000019937	514870	WD repeat domain 3 [Source:VGNC Symbol;Acc:VGNC:36890]	WDR3	2.01936	2.0251	3.71686	1.1942e-06	8.10065e-05
ENSBTAG00000010350	107131223	ubiquitin specific peptidase 53 [Source:VGNC Symbol;Acc:VGNC:58425]	USP53	3.05523	3.9815	1.60702e-06	0.000108287		ENSBTAG00000000088	281614	activated leukocyte cell adhesion molecule [Source:VGNC Symbol;Acc:VGNC:25805]	ALCAM	3.32208	3.34258	3.44656	1.25148e-06	8.43297e-05
ENSBTAG00000021020	541247	replication timing regulatory factor 1 [Source:VGNC Symbol;Acc:VGNC:33965]	RIF1	2.08623	5.85201	1.67499e-06	0.000112125		ENSBTAG00000039682	515016	microtubule associated scaffold protein 1 [Source:VGNC Symbol;Acc:VGNC:31756]	MTUS1	-2.59838	-2.60321	4.77722	1.26576e-06	8.47158e-05
ENSBTAG00000002586	509039	transcription factor 12 [Source:VGNC Symbol;Acc:VGNC:35686]	TCF12	2.49936	3.07171	1.72122e-06	0.000113753		ENSBTAG00000007071	525869	retinoic acid induced 14 [Source:VGNC Symbol;Acc:VGNC:33696]	RAI14	3.06034	3.06808	4.46834	1.27386e-06	8.47158e-05
ENSBTAG00000014927	526949	oxidative stress responsive kinase 1 [Source:VGNC Symbol;Acc:VGNC:32514]	OXSR1	3.295	3.1365	1.72167e-06	0.000113753		ENSBTAG00000002970	509695	integrator complex subunit 6 [Source:VGNC Symbol;Acc:VGNC:30232]	INTS6	2.18895	2.19741	3.3144	1.28538e-06	8.49271e-05
ENSBTAG00000051845	618541	uncharacterized LOC618541 [Source:NCBI gene (formerly Entrezgene);Acc:618541]	0	1.90796	4.82899	1.80058e-06	0.000117315		ENSBTAG00000001999	513716	NKAP domain containing 1 [Source:VGNC Symbol;Acc:VGNC:49538]	NKAPD1	1.86247	1.86306	6.81161	1.31497e-06	8.63212e-05
ENSBTAG00000021910	614346	TBL1X receptor 1 [Source:VGNC Symbol;Acc:VGNC:83112]	TBL1XR1	2.61489	3.94786	1.80728e-06	0.000117315		ENSBTAG00000005137	541208	lysophosphatidylglycerol acyltransferase 1 [Source:VGNC Symbol;Acc:VGNC:30965]	LPGAT1	2.31767	2.32576	3.58959	1.3673e-06	8.88618e-05
ENSBTAG00000000745	282653	aquaporin 1 (Colton blood group) [Source:NCBI gene (formerly Entrezgene);Acc:282653]	AQP1	-2.30666	6.61626	1.81016e-06	0.000117315		ENSBTAG00000053726	782397	eukaryotic translation initiation factor 4E binding protein 2 [Source:NCBI gene (formerly Entrezgene);Acc:782397]	EIF4EBP2	3.07778	3.08298	5.02395	1.37114e-06	8.88618e-05
ENSBTAG00000054135	#N/A	0	0	-2.8653	3.86744	1.85401e-06	0.000119396		ENSBTAG00000030836	510136	zinc finger and BTB domain containing 21 [Source:VGNC Symbol;Acc:VGNC:37066]	ZBTB21	2.60537	2.60976	4.81608	1.39397e-06	8.97702e-05
ENSBTAG00000039922	512010	ArfGAP with RhoGAP domain, ankyrin repeat and PH domain 2 [Source:VGNC Symbol;Acc:VGNC:26055]	ARAP2	2.4568	3.6553	1.97413e-06	0.000126332		ENSBTAG00000019069	513812	synaptogyrin 2 [Source:NCBI gene (formerly Entrezgene);Acc:513812]	SYNGR2	-1.49708	-1.49751	6.59402	1.41499e-06	9.05502e-05
ENSBTAG00000008852	504258	sialic acid binding Ig like lectin 10 [Source:NCBI gene (formerly Entrezgene);Acc:504258]	SIGLEC10	-2.73007	3.40364	2.02407e-06	0.000128146		ENSBTAG00000019437	521795	schlafen family member 11 [Source:NCBI gene (formerly Entrezgene);Acc:521795]	SLFN11	5.50239	5.77744	2.11403	1.47266e-06	9.34826e-05
ENSBTAG00000020584	519602	intraflagellar transport 81 [Source:VGNC Symbol;Acc:VGNC:30073]	IFT81	1.83886	4.45996	2.02767e-06	0.000128146		ENSBTAG00000002147	504900	protein phosphatase 4 regulatory subunit 2 [Source:VGNC Symbol;Acc:VGNC:33270]	PPP4R2	1.8915	1.89316	5.3583	1.47918e-06	9.34826e-05
ENSBTAG00000008353	513497	cyclin dependent kinase inhibitor 1A [Source:VGNC Symbol;Acc:VGNC:27142]	CDKN1A	-1.51515	9.81627	2.0454e-06	0.000128469		ENSBTAG00000015965	506983	zinc finger CCCH-type containing 8 [Source:VGNC Symbol;Acc:VGNC:37110]	ZC3H8	1.91163	1.91407	4.66047	1.52926e-06	9.60509e-05
ENSBTAG00000014920	535644	semaphorin 3E [Source:VGNC Symbol;Acc:VGNC:34430]	SEMA3E	4.02033	2.64882	2.0703e-06	0.000129235		ENSBTAG00000008852	504258	sialic acid binding Ig like lectin 10 [Source:NCBI gene (formerly Entrezgene);Acc:504258]	SIGLEC10	-2.75355	-2.7662	3.40364	1.55997e-06	9.70933e-05
ENSBTAG00000008771	524920	myelin expression factor 2 [Source:VGNC Symbol;Acc:VGNC:31791]	MYEF2	2.13619	4.18868	2.10233e-06	0.000129403		ENSBTAG00000011538	527883	kinesin family member 1A [Source:VGNC Symbol;Acc:VGNC:30590]	KIF1A	-6.78281	-6.85488	5.28019	1.56494e-06	9.70933e-05
ENSBTAG00000015771	541050	YTH N6-methyladenosine RNA binding protein 2 [Source:VGNC Symbol;Acc:VGNC:37042]	YTHDF2	1.81856	4.18933	2.13137e-06	0.000129403		ENSBTAG00000021910	614346	TBL1X receptor 1 [Source:VGNC Symbol;Acc:VGNC:83112]	TBL1XR1	2.67791	2.68692	3.94786	1.62422e-06	9.99626e-05
ENSBTAG00000006246	538885	chromobox 5 [Source:VGNC Symbol;Acc:VGNC:26818]	CBX5	2.23383	6.73977	2.14798e-06	0.000129403		ENSBTAG00000020533	539922	F-box protein 34 [Source:VGNC Symbol;Acc:VGNC:28907]	FBXO34	2.81376	2.84145	2.59344	1.63472e-06	9.99626e-05
ENSBTAG00000011885	280878	nicotinamide nucleotide transhydrogenase [Source:VGNC Symbol;Acc:VGNC:32143]	NNT	1.907	3.39152	2.15691e-06	0.000129403		ENSBTAG00000006118	532701	arginine and serine rich coiled-coil 2 [Source:VGNC Symbol;Acc:VGNC:52819]	RSRC2	2.18775	2.18876	6.40789	1.65661e-06	9.99626e-05
ENSBTAG00000008550	100125415	GTPase, IMAP family member 7 [Source:NCBI gene (formerly Entrezgene);Acc:100125415]	GIMAP7	3.05136	5.42872	2.16177e-06	0.000129403		ENSBTAG00000020584	519602	intraflagellar transport 81 [Source:VGNC Symbol;Acc:VGNC:30073]	IFT81	1.85485	1.85792	4.45996	1.66027e-06	9.99626e-05
ENSBTAG00000002048	533590	protein tyrosine phosphatase non-receptor type 11 [Source:VGNC Symbol;Acc:VGNC:33530]	PTPN11	2.36189	6.96946	2.17088e-06	0.000129403		ENSBTAG00000020014	785182	centrosomal protein 104 [Source:VGNC Symbol;Acc:VGNC:27189]	CEP104	2.34632	2.35228	4.10348	1.66031e-06	9.99626e-05
ENSBTAG00000002970	509695	integrator complex subunit 6 [Source:VGNC Symbol;Acc:VGNC:30232]	INTS6	2.17234	3.3144	2.18225e-06	0.000129403		ENSBTAG00000043567	#N/A	0	0	1.91655	1.91655	13.7963	1.71474e-06	0.000102632
ENSBTAG00000004159	#N/A	#N/A	#N/A	4.50862	2.10953	2.18918e-06	0.000129403		ENSBTAG00000009405	282102	transient receptor potential cation channel subfamily C member 4 [Source:VGNC Symbol;Acc:VGNC:36383]	TRPC4	2.22868	2.23388	4.30769	1.76528e-06	0.000105039
ENSBTAG00000008414	538494	zinc finger RNA binding protein [Source:VGNC Symbol;Acc:VGNC:37171]	ZFR	1.85206	6.56901	2.19788e-06	0.000129403		ENSBTAG00000011401	519573	PDZ domain containing 8 [Source:VGNC Symbol;Acc:VGNC:32728]	PDZD8	1.70582	1.70801	4.65512	1.85324e-06	0.000108508
ENSBTAG00000019625	518852	enoyl-CoA hydratase and 3-hydroxyacyl CoA dehydrogenase [Source:VGNC Symbol;Acc:VGNC:53541]	EHHADH	4.06477	1.51199	2.20016e-06	0.000129403		ENSBTAG00000018385	614259	DnaJ heat shock protein family (Hsp40) member C8 [Source:VGNC Symbol;Acc:VGNC:49059]	DNAJC8	2.60009	2.60173	6.18261	1.85608e-06	0.000108508
ENSBTAG00000047679	511258	deoxynucleotidyltransferase terminal interacting protein 2 [Source:VGNC Symbol;Acc:VGNC:28152]	DNTTIP2	1.6296	6.58154	2.21706e-06	0.000129647		ENSBTAG00000019107	614517	growth arrest specific 7 [Source:VGNC Symbol;Acc:VGNC:29262]	GAS7	-4.78898	-4.90956	2.64585	1.86219e-06	0.000108508
ENSBTAG00000034436	100138102	3-phosphoinositide dependent protein kinase 1 [Source:NCBI gene (formerly Entrezgene);Acc:100138102]	PDPK1	2.29458	3.26948	2.25649e-06	0.000131199		ENSBTAG00000001517	506480	keratin 18 [Source:VGNC Symbol;Acc:VGNC:30719]	KRT18	-5.29784	-5.32078	5.19059	1.86623e-06	0.000108508
ENSBTAG00000004355	100337359	roundabout guidance receptor 3 [Source:VGNC Symbol;Acc:VGNC:34080]	ROBO3	-2.0775	4.1899	2.36934e-06	0.000136977		ENSBTAG00000003665	100125264	nucleoporin 210 [Source:VGNC Symbol;Acc:VGNC:32356]	NUP210	-5.87452	-6.11066	2.90786	1.94861e-06	0.000112654
ENSBTAG00000000949	510898	DnaJ heat shock protein family (Hsp40) member C9 [Source:VGNC Symbol;Acc:VGNC:55985]	DNAJC9	2.16461	3.5633	2.54019e-06	0.00014585		ENSBTAG00000007639	507675	SDA1 domain containing 1 [Source:VGNC Symbol;Acc:VGNC:34377]	SDAD1	1.51582	1.51659	5.88683	1.97608e-06	0.000113597
ENSBTAG00000008816	538617	tripartite motif containing 2 [Source:VGNC Symbol;Acc:VGNC:36318]	TRIM2	2.19197	5.36267	2.55149e-06	0.00014585		ENSBTAG00000017368	287023	Y-box binding protein 1 [Source:VGNC Symbol;Acc:VGNC:50233]	YBX1	1.9156	1.91576	8.69949	2.02965e-06	0.000115605
ENSBTAG00000038251	538989	N-alpha-acetyltransferase 16, NatA auxiliary subunit [Source:VGNC Symbol;Acc:VGNC:53828]	NAA16	2.44689	2.70736	2.5771e-06	0.000146492		ENSBTAG00000021485	614807	chromosome 3 C1orf54 homolog [Source:VGNC Symbol;Acc:VGNC:52714]	C3H1orf54	-2.5226	-2.53487	3.30462	2.03989e-06	0.000115605
ENSBTAG00000039529	615438	BTB domain containing 19 [Source:VGNC Symbol;Acc:VGNC:26588]	BTBD19	-1.4784	5.49809	2.64908e-06	0.000149747		ENSBTAG00000004840	767827	complement C1s [Source:VGNC Symbol;Acc:VGNC:26630]	C1S	-2.34958	-2.35434	4.44743	2.04511e-06	0.000115605
ENSBTAG00000020819	534353	YY1 transcription factor [Source:VGNC Symbol;Acc:VGNC:55896]	YY1	1.36547	7.20903	2.68809e-06	0.000149798		ENSBTAG00000016185	513095	ENAH actin regulator [Source:VGNC Symbol;Acc:VGNC:59333]	ENAH	2.42712	2.42881	6.14132	2.07932e-06	0.000116092
ENSBTAG00000002002	#N/A	ATPase family AAA domain containing 2 [Source:VGNC Symbol;Acc:VGNC:26233]	ATAD2	2.33535	4.2846	2.6946e-06	0.000149798		ENSBTAG00000017537	282021	prostaglandin I2 synthase [Source:VGNC Symbol;Acc:VGNC:33509]	PTGIS	-2.88598	-2.92029	2.66331	2.08287e-06	0.000116092
ENSBTAG00000024387	535496	patatin like phospholipase domain containing 8 [Source:VGNC Symbol;Acc:VGNC:33095]	PNPLA8	2.48727	2.63338	2.70109e-06	0.000149798		ENSBTAG00000010286	526583	nuclear protein, coactivator of histone transcription [Source:VGNC Symbol;Acc:VGNC:50617]	NPAT	2.5421	2.55456	3.16178	2.08795e-06	0.000116092
ENSBTAG00000011789	507148	RE1 silencing transcription factor B [Source:VGNC Symbol;Acc:VGNC:96876]	RESTB	2.0171	4.53818	2.70887e-06	0.000149798		ENSBTAG00000038251	538989	N-alpha-acetyltransferase 16, NatA auxiliary subunit [Source:VGNC Symbol;Acc:VGNC:53828]	NAA16	2.43636	2.45308	2.70736	2.1018e-06	0.000116227
ENSBTAG00000017223	404180	mesoderm specific transcript [Source:VGNC Symbol;Acc:VGNC:31393]	MEST	-2.70022	4.76652	2.73606e-06	0.000150483		ENSBTAG00000005116	783009	FKBP prolyl isomerase 15 [Source:VGNC Symbol;Acc:VGNC:29020]	FKBP15	3.08895	3.1227	2.44007	2.15332e-06	0.000118433
ENSBTAG00000021900	519754	protein kinase N2 [Source:VGNC Symbol;Acc:VGNC:32946]	PKN2	1.96595	4.72707	2.7657e-06	0.000150893		ENSBTAG00000027932	534211	baculoviral IAP repeat containing 6 [Source:VGNC Symbol;Acc:VGNC:26502]	BIRC6	2.43941	2.44398	4.53417	2.17668e-06	0.000119074
ENSBTAG00000012677	540393	Rho GTPase activating protein 12 [Source:VGNC Symbol;Acc:VGNC:26075]	ARHGAP12	1.4222	5.6867	2.77583e-06	0.000150893		ENSBTAG00000037510	615733	GTPase, IMAP family member 1 [Source:NCBI gene (formerly Entrezgene);Acc:615733]	0	3.14629	3.17826	2.75906	2.22895e-06	0.000120834
ENSBTAG00000001999	513716	NKAP domain containing 1 [Source:VGNC Symbol;Acc:VGNC:49538]	NKAPD1	1.76429	6.81161	2.78799e-06	0.000150893		ENSBTAG00000053044	540152	CDC42 effector protein 4 [Source:NCBI gene (formerly Entrezgene);Acc:540152]	CDC42EP4	-1.61486	-1.61621	5.32222	2.24078e-06	0.000120834
ENSBTAG00000001364	767944	diphthamine biosynthesis 6 [Source:VGNC Symbol;Acc:VGNC:28181]	DPH6	-1.66345	5.03171	2.81327e-06	0.000151455		ENSBTAG00000026953	786759	thyroid hormone receptor interactor 11 [Source:NCBI gene (formerly Entrezgene);Acc:786759]	TRIP11	2.26714	2.27029	4.91123	2.24449e-06	0.000120834
ENSBTAG00000030259	524957	Ras protein specific guanine nucleotide releasing factor 2 [Source:VGNC Symbol;Acc:VGNC:33746]	RASGRF2	4.09446	2.54251	2.85769e-06	0.000153037		ENSBTAG00000051779	616553	prefoldin subunit 1 [Source:NCBI gene (formerly Entrezgene);Acc:616553]	PFDN1	1.83263	1.83339	6.44943	2.3325e-06	0.000124912
ENSBTAG00000013535	507981	DNA fragmentation factor subunit alpha [Source:NCBI gene (formerly Entrezgene);Acc:507981]	DFFA	-1.44603	5.72234	2.96567e-06	0.000157988		ENSBTAG00000017223	404180	mesoderm specific transcript [Source:VGNC Symbol;Acc:VGNC:31393]	MEST	-2.87843	-2.88495	4.76652	2.34608e-06	0.000124981
ENSBTAG00000002382	528483	DEAD-box helicase 10 [Source:VGNC Symbol;Acc:VGNC:27956]	DDX10	1.37656	5.75183	2.9813e-06	0.000157993		ENSBTAG00000008287	540849	YLP motif containing 1 [Source:VGNC Symbol;Acc:VGNC:37031]	YLPM1	1.59169	1.59323	5.13313	2.38484e-06	0.000126384
ENSBTAG00000001244	281407	plasminogen activator, tissue type [Source:VGNC Symbol;Acc:VGNC:32974]	PLAT	-1.54035	7.86886	3.00084e-06	0.000158205		ENSBTAG00000001104	540247	CKLF like MARVEL transmembrane domain containing 4 [Source:VGNC Symbol;Acc:VGNC:27484]	CMTM4	2.60496	2.63345	2.32355	2.42229e-06	0.000127704
ENSBTAG00000015385	540232	CTD small phosphatase like 2 [Source:VGNC Symbol;Acc:VGNC:27792]	CTDSPL2	2.26613	3.80472	3.11523e-06	0.000163389		ENSBTAG00000018796	516619	Rab geranylgeranyltransferase subunit alpha [Source:VGNC Symbol;Acc:VGNC:33670]	RABGGTA	-1.55106	-1.55199	5.55073	2.49499e-06	0.000130573
ENSBTAG00000012867	511331	taxilin alpha [Source:VGNC Symbol;Acc:VGNC:36530]	TXLNA	4.59002	2.07885	3.15899e-06	0.000164834		ENSBTAG00000000421	516259	early endosome antigen 1 [Source:VGNC Symbol;Acc:VGNC:54421]	EEA1	1.78055	1.78127	6.43748	2.50238e-06	0.000130573
ENSBTAG00000044197	518089	EDAR associated death domain [Source:VGNC Symbol;Acc:VGNC:28319]	EDARADD	-3.52659	1.90782	3.21114e-06	0.000166701		ENSBTAG00000054239	100337161	kinesin family member 1B [Source:NCBI gene (formerly Entrezgene);Acc:100337161]	0	2.46083	2.47134	3.40767	2.59543e-06	0.00013456
ENSBTAG00000039682	515016	microtubule associated scaffold protein 1 [Source:VGNC Symbol;Acc:VGNC:31756]	MTUS1	-2.34396	4.77722	3.24394e-06	0.000167549		ENSBTAG00000000011	511957	L-threonine dehydrogenase [Source:NCBI gene (formerly Entrezgene);Acc:511957]	TDH	3.89544	3.96591	1.91527	2.60524e-06	0.00013456
ENSBTAG00000010030	#N/A	EPH receptor A4 [Source:VGNC Symbol;Acc:VGNC:56106]	EPHA4	3.00106	2.89622	3.31305e-06	0.000170254		ENSBTAG00000010289	515968	gem nuclear organelle associated protein 8 [Source:VGNC Symbol;Acc:VGNC:29321]	GEMIN8	-1.42194	-1.42259	6.06134	2.6267e-06	0.000134983
ENSBTAG00000010850	614583	SERTA domain containing 4 [Source:VGNC Symbol;Acc:VGNC:34486]	SERTAD4	1.87998	4.39134	3.35209e-06	0.000171394		ENSBTAG00000014906	282662	versican [Source:VGNC Symbol;Acc:VGNC:36778]	VCAN	3.85604	3.86301	5.51893	2.66893e-06	0.000136464
ENSBTAG00000005265	506049	zinc finger CCHC-type containing 9 [Source:VGNC Symbol;Acc:VGNC:97331]	ZCCHC9	2.25045	4.01583	3.39793e-06	0.00017287		ENSBTAG00000020041	540987	family with sequence similarity 13 member B [Source:VGNC Symbol;Acc:VGNC:55222]	FAM13B	2.77607	2.792	3.1559	2.73566e-06	0.000139176
ENSBTAG00000008028	508266	chimerin 1 [Source:VGNC Symbol;Acc:VGNC:27307]	CHN1	2.91937	2.6087	3.4757e-06	0.000174024		ENSBTAG00000016457	536793	FMR1 autosomal homolog 1 [Source:VGNC Symbol;Acc:VGNC:56218]	FXR1	1.5586	1.559	7.05052	2.75159e-06	0.000139291
ENSBTAG00000007490	533264	sulfatase 2 [Source:VGNC Symbol;Acc:VGNC:35466]	SULF2	-2.63491	5.09913	3.47792e-06	0.000174024		ENSBTAG00000000139	532622	lysine methyltransferase 5A [Source:VGNC Symbol;Acc:VGNC:53910]	KMT5A	2.87487	2.88852	3.35624	2.76668e-06	0.000139361
ENSBTAG00000005145	786652	pseudopodium enriched atypical kinase 1 [Source:VGNC Symbol;Acc:VGNC:32733]	PEAK1	2.61546	2.83193	3.47962e-06	0.000174024		ENSBTAG00000003832	281912	microfibril associated protein 2 [Source:VGNC Symbol;Acc:VGNC:31422]	MFAP2	-4.47582	-4.52482	3.10752	3.09762e-06	0.00015405
ENSBTAG00000003481	100847538	OTU deubiquitinase 6B [Source:VGNC Symbol;Acc:VGNC:32498]	OTUD6B	2.06935	3.20913	3.48903e-06	0.000174024		ENSBTAG00000000745	282653	aquaporin 1 (Colton blood group) [Source:NCBI gene (formerly Entrezgene);Acc:282653]	AQP1	-2.24875	-2.24989	6.61626	3.09808e-06	0.00015405
ENSBTAG00000013238	511513	cyclin dependent kinase 12 [Source:VGNC Symbol;Acc:VGNC:27117]	CDK12	1.62506	4.80413	3.60252e-06	0.000178178		ENSBTAG00000052115	#N/A	#N/A	#N/A	7.85095	1.44269e+08	1.94411	3.10372e-06	0.00015405
ENSBTAG00000001867	539378	sacsin molecular chaperone [Source:VGNC Symbol;Acc:VGNC:34260]	SACS	3.27595	3.64418	3.60734e-06	0.000178178		ENSBTAG00000005738	541187	ATPase phospholipid transporting 8B1 [Source:VGNC Symbol;Acc:VGNC:26330]	ATP8B1	5.35525	5.86013	1.69121	3.25604e-06	0.000160826
ENSBTAG00000011368	510425	NOC3 like DNA replication regulator [Source:VGNC Symbol;Acc:VGNC:32147]	NOC3L	1.72722	5.43556	3.68966e-06	0.000181364		ENSBTAG00000008772	539217	structural maintenance of chromosomes 2 [Source:VGNC Symbol;Acc:VGNC:34999]	SMC2	1.90724	1.90773	7.17158	3.29783e-06	0.000162104
ENSBTAG00000014906	282662	versican [Source:VGNC Symbol;Acc:VGNC:36778]	VCAN	3.65351	5.51893	3.71136e-06	0.000181553		ENSBTAG00000053595	510459	homeobox A9 [Source:NCBI gene (formerly Entrezgene);Acc:510459]	HOXA9	-6.35524	-6.51764	3.34655	3.42731e-06	0.000167658
ENSBTAG00000014558	781917	DExD-box helicase 21 [Source:VGNC Symbol;Acc:VGNC:97259]	DDX21	2.01436	9.01245	3.75171e-06	0.000182271		ENSBTAG00000000545	516489	protein phosphatase 4 regulatory subunit 3B [Source:VGNC Symbol;Acc:VGNC:58608]	PPP4R3B	1.6805	1.68175	5.4885	3.50093e-06	0.00016919
ENSBTAG00000019085	614017	signal recognition particle 54 [Source:VGNC Symbol;Acc:VGNC:35285]	SRP54	2.42435	2.80058	3.76187e-06	0.000182271		ENSBTAG00000010850	614583	SERTA domain containing 4 [Source:VGNC Symbol;Acc:VGNC:34486]	SERTAD4	1.87893	1.88239	4.39134	3.50229e-06	0.00016919
ENSBTAG00000019588	#N/A	#N/A	#N/A	-7.63486	1.35769	3.81534e-06	0.000183986		ENSBTAG00000051486	530547	ubiquitin fold modifier 1 [Source:NCBI gene (formerly Entrezgene);Acc:530547]	UFM1	1.93491	1.93692	4.96365	3.50851e-06	0.00016919
ENSBTAG00000002317	280904	pleiotrophin [Source:VGNC Symbol;Acc:VGNC:33521]	PTN	1.88142	7.4158	3.90233e-06	0.000187293		ENSBTAG00000013793	507781	NEDD4 E3 ubiquitin protein ligase [Source:VGNC Symbol;Acc:VGNC:55128]	NEDD4	1.44831	1.44924	5.59005	3.58554e-06	0.000172018
ENSBTAG00000049341	786476	SERTA domain containing 2 [Source:NCBI gene (formerly Entrezgene);Acc:786476]	SERTAD2	1.4468	5.96153	3.92564e-06	0.000187528		ENSBTAG00000016838	512631	SRSF protein kinase 1 [Source:VGNC Symbol;Acc:VGNC:54238]	SRPK1	2.34375	2.34688	4.89473	3.6131e-06	0.000172018
ENSBTAG00000007071	525869	retinoic acid induced 14 [Source:VGNC Symbol;Acc:VGNC:33696]	RAI14	2.75719	4.46834	4.01593e-06	0.000189784		ENSBTAG00000002317	280904	pleiotrophin [Source:VGNC Symbol;Acc:VGNC:33521]	PTN	1.89495	1.89538	7.4158	3.61787e-06	0.000172018
ENSBTAG00000031165	514642	transient receptor potential cation channel subfamily M member 7 [Source:VGNC Symbol;Acc:VGNC:36393]	TRPM7	2.57043	3.0633	4.01831e-06	0.000189784		ENSBTAG00000001736	525895	ubinuclein 1 [Source:VGNC Symbol;Acc:VGNC:36610]	UBN1	1.9174	1.91852	5.93613	3.74375e-06	0.000177175
ENSBTAG00000003569	506546	DAZ interacting zinc finger protein 1 [Source:VGNC Symbol;Acc:VGNC:28284]	DZIP1	1.56879	6.99342	4.05903e-06	0.000189784		ENSBTAG00000014900	527305	CCR4-NOT transcription complex subunit 3 [Source:VGNC Symbol;Acc:VGNC:27518]	CNOT3	-2.43153	-2.43898	3.71204	3.80541e-06	0.000179259
ENSBTAG00000033186	535804	3-oxoacid CoA-transferase 1 [Source:VGNC Symbol;Acc:VGNC:32508]	OXCT1	2.65285	3.40554	4.0663e-06	0.000189784		ENSBTAG00000002002	#N/A	ATPase family AAA domain containing 2 [Source:VGNC Symbol;Acc:VGNC:26233]	ATAD2	2.30264	2.30811	4.2846	3.83019e-06	0.000179595
ENSBTAG00000052115	#N/A	#N/A	#N/A	6.29936	1.94411	4.08381e-06	0.000189784		ENSBTAG00000017457	526376	serine/threonine kinase 10 [Source:VGNC Symbol;Acc:VGNC:35384]	STK10	2.42866	2.43389	4.53478	3.87935e-06	0.000180594
ENSBTAG00000020268	541248	remodeling and spacing factor 1 [Source:VGNC Symbol;Acc:VGNC:34178]	RSF1	1.43828	6.9778	4.08478e-06	0.000189784		ENSBTAG00000021923	508151	desmoglein 2 [Source:VGNC Symbol;Acc:VGNC:28221]	DSG2	2.23485	2.23733	5.19945	3.90067e-06	0.000180594
ENSBTAG00000026369	617091	ectodermal-neural cortex 1 [Source:VGNC Symbol;Acc:VGNC:28489]	ENC1	1.24306	7.71341	4.18986e-06	0.000193781		ENSBTAG00000020403	#N/A	zinc finger MYM-type containing 2 [Source:VGNC Symbol;Acc:VGNC:56646]	ZMYM2	2.26053	2.27163	3.14451	3.90474e-06	0.000180594
ENSBTAG00000004079	788468	zinc finger protein 106 [Source:VGNC Symbol;Acc:VGNC:37207]	ZNF106	1.42572	6.797	4.22407e-06	0.000194479		ENSBTAG00000004723	513262	testis expressed 2 [Source:VGNC Symbol;Acc:VGNC:35763]	TEX2	-1.70807	-1.70922	5.75349	4.029e-06	0.000185173
ENSBTAG00000025210	508632	collagen type IV alpha 2 chain [Source:VGNC Symbol;Acc:VGNC:50082]	COL4A2	3.93562	1.60215	4.26934e-06	0.000195247		ENSBTAG00000002341	540313	ETS proto-oncogene 1, transcription factor [Source:VGNC Symbol;Acc:VGNC:28626]	ETS1	2.12833	2.13027	5.25835	4.04015e-06	0.000185173
ENSBTAG00000021923	508151	desmoglein 2 [Source:VGNC Symbol;Acc:VGNC:28221]	DSG2	2.23224	5.19945	4.27912e-06	0.000195247		ENSBTAG00000025434	614773	ZFP36 ring finger protein like 1 [Source:VGNC Symbol;Acc:VGNC:37163]	ZFP36L1	1.24459	1.24479	7.5896	4.07341e-06	0.000185861
ENSBTAG00000003342	280997	adenosylmethionine decarboxylase 1 [Source:VGNC Symbol;Acc:VGNC:25859]	AMD1	1.67062	5.46732	4.34019e-06	0.000197149		ENSBTAG00000009131	534095	tetratricopeptide repeat domain 37 [Source:VGNC Symbol;Acc:VGNC:36473]	TTC37	2.65749	2.67192	3.11054	4.11568e-06	0.000186188
ENSBTAG00000016726	541135	kinesin family member 15 [Source:VGNC Symbol;Acc:VGNC:30584]	KIF15	1.79626	4.63973	4.4711e-06	0.000201722		ENSBTAG00000033186	535804	3-oxoacid CoA-transferase 1 [Source:VGNC Symbol;Acc:VGNC:32508]	OXCT1	2.66021	2.67286	3.40554	4.11718e-06	0.000186188
ENSBTAG00000004720	535166	sulfatase 1 [Source:VGNC Symbol;Acc:VGNC:53880]	SULF1	3.33952	2.39201	4.49606e-06	0.000201722		ENSBTAG00000010935	540187	EMAP like 4 [Source:VGNC Symbol;Acc:VGNC:28478]	EML4	2.53732	2.54945	3.31417	4.18676e-06	0.000187821
ENSBTAG00000032521	100299044	pleckstrin homology, MyTH4 and FERM domain containing H2 [Source:VGNC Symbol;Acc:VGNC:33021]	PLEKHH2	3.71152	2.12436	4.50034e-06	0.000201722		ENSBTAG00000009471	509483	centrosomal protein 135 [Source:VGNC Symbol;Acc:VGNC:27193]	CEP135	1.96366	1.96846	3.93963	4.22537e-06	0.000187821
ENSBTAG00000007806	541099	myotrophin [Source:VGNC Symbol;Acc:VGNC:50020]	MTPN	1.50269	6.70089	4.5311e-06	0.00020221		ENSBTAG00000020412	522707	RAP2A, member of RAS oncogene family [Source:VGNC Symbol;Acc:VGNC:33719]	RAP2A	3.69133	3.77073	1.77257	4.23078e-06	0.000187821
ENSBTAG00000011743	504975	tolloid like 2 [Source:VGNC Symbol;Acc:VGNC:35896]	TLL2	-7.2957	1.18788	4.67685e-06	0.000207803		ENSBTAG00000004079	788468	zinc finger protein 106 [Source:VGNC Symbol;Acc:VGNC:37207]	ZNF106	1.41593	1.41631	6.797	4.24871e-06	0.000187821
ENSBTAG00000021035	513038	cathepsin K [Source:VGNC Symbol;Acc:VGNC:27817]	CTSK	2.06007	6.78003	4.73045e-06	0.000209271		ENSBTAG00000011642	516521	RNA binding motif protein 27 [Source:NCBI gene (formerly Entrezgene);Acc:516521]	RBM27	1.91249	1.91439	5.16384	4.25321e-06	0.000187821
ENSBTAG00000031184	510972	cyclin dependent kinase inhibitor 1C [Source:VGNC Symbol;Acc:VGNC:27144]	CDKN1C	-1.83975	3.69526	4.75828e-06	0.000209591		ENSBTAG00000005261	534348	Fc fragment of IgG binding protein [Source:NCBI gene (formerly Entrezgene);Acc:534348]	0	-3.14458	-3.19015	2.0526	4.26405e-06	0.000187821
ENSBTAG00000019267	282872	matrix metallopeptidase 2 [Source:VGNC Symbol;Acc:VGNC:31524]	MMP2	-1.95818	5.13148	4.79779e-06	0.000210066		ENSBTAG00000009778	541140	KRAS proto-oncogene, GTPase [Source:VGNC Symbol;Acc:VGNC:30710]	KRAS	1.66065	1.66273	4.77123	4.29104e-06	0.000188139
ENSBTAG00000018153	532919	nuclear receptor binding protein 1 [Source:VGNC Symbol;Acc:VGNC:32255]	NRBP1	3.93766	2.83262	4.81037e-06	0.000210066		ENSBTAG00000020012	767817	cell division cycle 5 like [Source:VGNC Symbol;Acc:VGNC:27080]	CDC5L	1.25759	1.25788	7.04704	4.30825e-06	0.000188139
ENSBTAG00000000201	519526	listerin E3 ubiquitin protein ligase 1 [Source:VGNC Symbol;Acc:VGNC:31078]	LTN1	2.20249	3.22084	4.86211e-06	0.000211151		ENSBTAG00000021343	503575	Rho guanine nucleotide exchange factor 12 [Source:VGNC Symbol;Acc:VGNC:26106]	ARHGEF12	2.04004	2.04247	5.05714	4.32801e-06	0.000188194
ENSBTAG00000017108	514809	OTU deubiquitinase 3 [Source:VGNC Symbol;Acc:VGNC:32494]	OTUD3	2.71763	2.67752	4.89824e-06	0.000211151		ENSBTAG00000008550	100125415	GTPase, IMAP family member 7 [Source:NCBI gene (formerly Entrezgene);Acc:100125415]	GIMAP7	2.93144	2.93569	5.42872	4.35181e-06	0.000188424
ENSBTAG00000009502	516426	leucine zipper protein 1 [Source:VGNC Symbol;Acc:VGNC:31084]	LUZP1	1.65162	6.7575	4.91056e-06	0.000211151		ENSBTAG00000017809	533206	PDS5 cohesin associated factor A [Source:VGNC Symbol;Acc:VGNC:32717]	PDS5A	1.94792	1.95237	4.09615	4.39713e-06	0.000189395
ENSBTAG00000027932	534211	baculoviral IAP repeat containing 6 [Source:VGNC Symbol;Acc:VGNC:26502]	BIRC6	2.30471	4.53417	4.91821e-06	0.000211151		ENSBTAG00000021900	519754	protein kinase N2 [Source:VGNC Symbol;Acc:VGNC:32946]	PKN2	1.91116	1.91404	4.72707	4.41146e-06	0.000189395
ENSBTAG00000006546	281805	glutathione S-transferase alpha 2 [Source:NCBI gene (formerly Entrezgene);Acc:281805]	GSTA2	-2.44126	4.11207	4.95065e-06	0.000211651		ENSBTAG00000010550	506307	eukaryotic translation initiation factor 5A2 [Source:VGNC Symbol;Acc:VGNC:28419]	EIF5A2	3.54949	3.64098	1.47471	4.79193e-06	0.000204865
ENSBTAG00000052369	#N/A	0	0	1.42334	7.31246	5.009e-06	0.000213144		ENSBTAG00000003876	536656	mitochondrial calcium uniporter [Source:VGNC Symbol;Acc:VGNC:31325]	MCU	2.12799	2.13206	4.20738	4.87955e-06	0.000207738
ENSBTAG00000046358	282296	poly(A) binding protein cytoplasmic 1 [Source:VGNC Symbol;Acc:VGNC:53870]	PABPC1	1.24288	9.89735	5.02748e-06	0.000213144		ENSBTAG00000018381	528033	cytokine receptor like factor 3 [Source:VGNC Symbol;Acc:VGNC:27718]	CRLF3	2.38319	2.38934	4.00715	4.93247e-06	0.000208437
ENSBTAG00000017368	287023	Y-box binding protein 1 [Source:VGNC Symbol;Acc:VGNC:50233]	YBX1	1.79413	8.69949	5.13695e-06	0.000216317		ENSBTAG00000027159	613795	zinc finger and BTB domain containing 8 opposite strand [Source:VGNC Symbol;Acc:VGNC:53571]	ZBTB8OS	1.69188	1.6948	4.41476	4.93694e-06	0.000208437
ENSBTAG00000005230	525900	short stature homeobox 2 [Source:VGNC Symbol;Acc:VGNC:34606]	SHOX2	1.47897	5.31483	5.14483e-06	0.000216317		ENSBTAG00000018374	504482	WASP family member 2 [Source:VGNC Symbol;Acc:VGNC:36866]	WASF2	3.22272	3.23521	4.03506	5.05659e-06	0.000212607
ENSBTAG00000020966	522085	ALX homeobox 3 [Source:VGNC Symbol;Acc:VGNC:25854]	ALX3	2.2464	3.19541	5.17239e-06	0.000216581		ENSBTAG00000006718	532708	nuclear VCP like [Source:VGNC Symbol;Acc:VGNC:32372]	NVL	1.97066	1.97371	4.51239	5.08668e-06	0.000212992
ENSBTAG00000015441	281595	actin gamma 2, smooth muscle [Source:VGNC Symbol;Acc:VGNC:59201]	ACTG2	3.20555	5.2383	5.24067e-06	0.00021854		ENSBTAG00000026995	100296970	pinin, desmosome associated protein [Source:VGNC Symbol;Acc:VGNC:33087]	PNN	1.31701	1.31726	7.34419	5.20213e-06	0.000216304
ENSBTAG00000001333	#N/A	#N/A	#N/A	3.23975	3.15274	5.29399e-06	0.000219063		ENSBTAG00000033315	781036	DnaJ heat shock protein family (Hsp40) member C1 [Source:NCBI gene (formerly Entrezgene);Acc:781036]	DNAJC1	1.35292	1.35405	5.32639	5.20831e-06	0.000216304
ENSBTAG00000000421	516259	early endosome antigen 1 [Source:VGNC Symbol;Acc:VGNC:54421]	EEA1	1.6827	6.43748	5.31716e-06	0.000219063		ENSBTAG00000009502	516426	leucine zipper protein 1 [Source:VGNC Symbol;Acc:VGNC:31084]	LUZP1	1.64342	1.64396	6.7575	5.25082e-06	0.000216447
ENSBTAG00000015228	613384	CD74 molecule [Source:VGNC Symbol;Acc:VGNC:52227]	CD74	-5.36202	1.34441	5.31779e-06	0.000219063		ENSBTAG00000054986	#N/A	ArfGAP with coiled-coil, ankyrin repeat and PH domains 2 [Source:HGNC Symbol;Acc:HGNC:16469]	ACAP2	2.93369	2.94705	3.56035	5.2543e-06	0.000216447
ENSBTAG00000008287	540849	YLP motif containing 1 [Source:VGNC Symbol;Acc:VGNC:37031]	YLPM1	1.5137	5.13313	5.4604e-06	0.00022403		ENSBTAG00000014297	523206	Mov10 RISC complex RNA helicase [Source:VGNC Symbol;Acc:VGNC:31566]	MOV10	-1.29509	-1.29552	6.48272	5.31961e-06	0.000218254
ENSBTAG00000011721	524868	mediator complex subunit 13 [Source:VGNC Symbol;Acc:VGNC:31350]	MED13	1.85002	4.44141	5.57082e-06	0.000227643		ENSBTAG00000031165	514642	transient receptor potential cation channel subfamily M member 7 [Source:VGNC Symbol;Acc:VGNC:36393]	TRPM7	2.38302	2.39459	3.0633	5.44935e-06	0.000221727
ENSBTAG00000000545	516489	protein phosphatase 4 regulatory subunit 3B [Source:VGNC Symbol;Acc:VGNC:58608]	PPP4R3B	1.63747	5.4885	5.59358e-06	0.000227659		ENSBTAG00000000998	524456	solute carrier family 39 member 6 [Source:VGNC Symbol;Acc:VGNC:34866]	SLC39A6	3.22868	3.26088	2.44406	5.46043e-06	0.000221727
ENSBTAG00000009715	526867	programmed cell death 11 [Source:VGNC Symbol;Acc:VGNC:32659]	PDCD11	1.33949	6.32109	5.69021e-06	0.000230669		ENSBTAG00000003733	511869	transmembrane 4 L six family member 5 [Source:VGNC Symbol;Acc:VGNC:35907]	TM4SF5	-1.85442	-1.8587	3.9264	5.46964e-06	0.000221727
ENSBTAG00000027159	613795	zinc finger and BTB domain containing 8 opposite strand [Source:VGNC Symbol;Acc:VGNC:53571]	ZBTB8OS	1.66899	4.41476	5.74638e-06	0.000230969		ENSBTAG00000000571	789296	Rho GTPase activating protein 27 [Source:VGNC Symbol;Acc:VGNC:26085]	ARHGAP27	-2.46187	-2.48032	2.66003	5.55687e-06	0.00022437
ENSBTAG00000016457	536793	FMR1 autosomal homolog 1 [Source:VGNC Symbol;Acc:VGNC:56218]	FXR1	1.48743	7.05052	5.74957e-06	0.000230969		ENSBTAG00000009715	526867	programmed cell death 11 [Source:VGNC Symbol;Acc:VGNC:32659]	PDCD11	1.32994	1.33042	6.32109	5.6291e-06	0.000226388
ENSBTAG00000025434	614773	ZFP36 ring finger protein like 1 [Source:VGNC Symbol;Acc:VGNC:37163]	ZFP36L1	1.22335	7.5896	5.76572e-06	0.000230969		ENSBTAG00000007067	#N/A	zinc finger CCCH-type containing 13 [Source:VGNC Symbol;Acc:VGNC:37101]	ZC3H13	2.10753	2.116	3.32858	5.72759e-06	0.000229107
ENSBTAG00000001117	527956	ankyrin repeat domain 50 [Source:VGNC Symbol;Acc:VGNC:25934]	ANKRD50	1.90408	4.06251	5.85329e-06	0.000233558		ENSBTAG00000019964	504526	growth arrest specific 6 [Source:VGNC Symbol;Acc:VGNC:29261]	GAS6	-1.41515	-1.41547	7.28099	5.74175e-06	0.000229107
ENSBTAG00000012881	444858	eukaryotic translation initiation factor 4 gamma 1 [Source:VGNC Symbol;Acc:VGNC:28415]	EIF4G1	1.44291	6.78994	5.95396e-06	0.000236647		ENSBTAG00000039922	512010	ArfGAP with RhoGAP domain, ankyrin repeat and PH domain 2 [Source:VGNC Symbol;Acc:VGNC:26055]	ARAP2	2.34873	2.35864	3.6553	6.00627e-06	0.000238428
ENSBTAG00000039770	507575	CCAAT enhancer binding protein zeta [Source:VGNC Symbol;Acc:VGNC:27164]	CEBPZ	1.58759	7.38099	6.01086e-06	0.000237978		ENSBTAG00000039529	615438	BTB domain containing 19 [Source:VGNC Symbol;Acc:VGNC:26588]	BTBD19	-1.40712	-1.40814	5.49809	6.02221e-06	0.000238428
ENSBTAG00000021250	523324	ralA binding protein 1 [Source:VGNC Symbol;Acc:VGNC:33700]	RALBP1	1.8339	6.08226	6.07992e-06	0.00023978		ENSBTAG00000021035	513038	cathepsin K [Source:VGNC Symbol;Acc:VGNC:27817]	CTSK	2.01167	2.01235	6.78003	6.10992e-06	0.000240963
ENSBTAG00000018385	614259	DnaJ heat shock protein family (Hsp40) member C8 [Source:VGNC Symbol;Acc:VGNC:49059]	DNAJC8	2.3547	6.18261	6.15949e-06	0.00024198		ENSBTAG00000054135	#N/A	0	0	-2.42251	-2.42883	3.86744	6.14505e-06	0.000241412
ENSBTAG00000010286	526583	nuclear protein, coactivator of histone transcription [Source:VGNC Symbol;Acc:VGNC:50617]	NPAT	2.39191	3.16178	6.23671e-06	0.000244071		ENSBTAG00000047293	524960	nuclear receptor interacting protein 1 [Source:VGNC Symbol;Acc:VGNC:32263]	NRIP1	2.7256	2.7394	3.27512	6.23301e-06	0.000243927
ENSBTAG00000054986	#N/A	ArfGAP with coiled-coil, ankyrin repeat and PH domains 2 [Source:HGNC Symbol;Acc:HGNC:16469]	ACAP2	2.90609	3.56035	6.33676e-06	0.000247036		ENSBTAG00000019036	530550	Rho GTPase activating protein 28 [Source:VGNC Symbol;Acc:VGNC:26086]	ARHGAP28	2.6523	2.66231	3.84448	6.39581e-06	0.000247392
ENSBTAG00000006118	532701	arginine and serine rich coiled-coil 2 [Source:VGNC Symbol;Acc:VGNC:52819]	RSRC2	1.98258	6.40789	6.45166e-06	0.000249682		ENSBTAG00000015228	613384	CD74 molecule [Source:VGNC Symbol;Acc:VGNC:52227]	CD74	-5.26258	-5.69814	1.34441	6.42178e-06	0.000247392
ENSBTAG00000017713	537619	kinectin 1 [Source:VGNC Symbol;Acc:VGNC:30756]	KTN1	1.4593	7.74141	6.4745e-06	0.000249682		ENSBTAG00000014927	526949	oxidative stress responsive kinase 1 [Source:VGNC Symbol;Acc:VGNC:32514]	OXSR1	2.97379	2.99447	3.1365	6.43014e-06	0.000247392
ENSBTAG00000017549	281885	KIT ligand [Source:VGNC Symbol;Acc:VGNC:30619]	KITLG	4.2886	2.48833	6.49474e-06	0.000249682		ENSBTAG00000003481	100847538	OTU deubiquitinase 6B [Source:VGNC Symbol;Acc:VGNC:32498]	OTUD6B	1.94666	1.95468	3.20913	6.44231e-06	0.000247392
ENSBTAG00000012077	541239	SMC5-SMC6 complex localization factor 2 [Source:VGNC Symbol;Acc:VGNC:34958]	SLF2	2.64798	3.23337	6.50481e-06	0.000249682		ENSBTAG00000047441	#N/A	60 kDa heat shock protein, mitochondrial [Source:UniProtKB/Swiss-Prot;Acc:P31081]	0	3.57378	3.61371	2.62622	6.44314e-06	0.000247392
ENSBTAG00000010506	540599	MYST/Esa1 associated factor 6 [Source:VGNC Symbol;Acc:VGNC:31342]	MEAF6	3.11522	2.25554	6.52732e-06	0.000249682		ENSBTAG00000015441	281595	actin gamma 2, smooth muscle [Source:VGNC Symbol;Acc:VGNC:59201]	ACTG2	3.19969	3.20535	5.2383	6.68927e-06	0.000255877
ENSBTAG00000051779	616553	prefoldin subunit 1 [Source:NCBI gene (formerly Entrezgene);Acc:616553]	PFDN1	1.68799	6.44943	6.58365e-06	0.000250894		ENSBTAG00000027024	788978	Rho GTPase activating protein 5 [Source:VGNC Symbol;Acc:VGNC:26098]	ARHGAP5	1.9382	1.93928	6.06121	6.7607e-06	0.000257641
ENSBTAG00000010063	100848816	lysine demethylase 3B [Source:VGNC Symbol;Acc:VGNC:30526]	KDM3B	3.36924	2.03194	6.62633e-06	0.000250918		ENSBTAG00000017416	535090	karyopherin subunit alpha 4 [Source:VGNC Symbol;Acc:VGNC:30703]	KPNA4	3.10469	3.11194	4.62824	6.86281e-06	0.000260556
ENSBTAG00000007441	508557	SEC23 interacting protein [Source:VGNC Symbol;Acc:VGNC:34412]	SEC23IP	1.90123	3.96549	6.6336e-06	0.000250918		ENSBTAG00000000169	281184	ankyrin repeat, SAM and basic leucine zipper domain containing 1 [Source:VGNC Symbol;Acc:VGNC:26231]	ASZ1	3.12215	3.1583	1.90436	6.9219e-06	0.000261823
ENSBTAG00000002006	281530	thrombospondin 1 [Source:VGNC Symbol;Acc:VGNC:35828]	THBS1	1.78151	10.1028	6.72808e-06	0.000253549		ENSBTAG00000007490	533264	sulfatase 2 [Source:VGNC Symbol;Acc:VGNC:35466]	SULF2	-2.48845	-2.49177	5.09913	7.07735e-06	0.000265111
ENSBTAG00000008862	532923	golgin B1 [Source:VGNC Symbol;Acc:VGNC:29489]	GOLGB1	1.45619	6.52749	6.75856e-06	0.000253758		ENSBTAG00000003342	280997	adenosylmethionine decarboxylase 1 [Source:VGNC Symbol;Acc:VGNC:25859]	AMD1	1.61581	1.61713	5.46732	7.09792e-06	0.000265111
ENSBTAG00000018812	404165	NOP56 ribonucleoprotein [Source:VGNC Symbol;Acc:VGNC:32169]	NOP56	1.20668	7.8728	7.07815e-06	0.000264019		ENSBTAG00000013425	101907531	COP9 signalosome subunit 2 [Source:VGNC Symbol;Acc:VGNC:27599]	COPS2	2.01868	2.02607	3.25846	7.10743e-06	0.000265111
ENSBTAG00000047441	#N/A	60 kDa heat shock protein, mitochondrial [Source:UniProtKB/Swiss-Prot;Acc:P31081]	0	3.69743	2.62622	7.08377e-06	0.000264019		ENSBTAG00000006142	509583	DEAH-box helicase 36 [Source:VGNC Symbol;Acc:VGNC:28054]	DHX36	1.48944	1.49015	6.04315	7.1475e-06	0.000265111
ENSBTAG00000021323	536149	ArfGAP with FG repeats 1 [Source:VGNC Symbol;Acc:VGNC:25725]	AGFG1	1.31171	6.04296	7.14673e-06	0.000265394		ENSBTAG00000018153	532919	nuclear receptor binding protein 1 [Source:VGNC Symbol;Acc:VGNC:32255]	NRBP1	3.78187	3.82538	2.83262	7.18134e-06	0.000265111
ENSBTAG00000010802	532497	potassium two pore domain channel subfamily K member 7 [Source:VGNC Symbol;Acc:VGNC:30477]	KCNK7	-2.83029	2.23403	7.37739e-06	0.000272964		ENSBTAG00000008963	786852	citron rho-interacting serine/threonine kinase [Source:VGNC Symbol;Acc:VGNC:27375]	CIT	2.95745	2.99837	2.10325	7.19051e-06	0.000265111
ENSBTAG00000014297	523206	Mov10 RISC complex RNA helicase [Source:VGNC Symbol;Acc:VGNC:31566]	MOV10	-1.2769	6.48272	7.46044e-06	0.000274632		ENSBTAG00000026896	529218	forkhead box F2 [Source:VGNC Symbol;Acc:VGNC:29085]	FOXF2	-2.59089	-2.62672	1.84342	7.19123e-06	0.000265111
ENSBTAG00000001939	511202	SECIS binding protein 2 [Source:VGNC Symbol;Acc:VGNC:34419]	SECISBP2	2.15122	3.63608	7.47646e-06	0.000274632		ENSBTAG00000009663	533297	Y-box binding protein 3 [Source:VGNC Symbol;Acc:VGNC:37018]	YBX3	3.01371	3.01483	7.02552	7.23495e-06	0.00026576
ENSBTAG00000026995	100296970	pinin, desmosome associated protein [Source:VGNC Symbol;Acc:VGNC:33087]	PNN	1.29423	7.34419	7.53891e-06	0.000275929		ENSBTAG00000020268	541248	remodeling and spacing factor 1 [Source:VGNC Symbol;Acc:VGNC:34178]	RSF1	1.38332	1.38367	6.9778	7.54701e-06	0.000276226
ENSBTAG00000010803	532324	CHM like Rab escort protein [Source:VGNC Symbol;Acc:VGNC:27298]	CHML	3.14838	2.58799	7.57043e-06	0.00027609		ENSBTAG00000017096	513044	glutamate rich 1 [Source:VGNC Symbol;Acc:VGNC:28582]	ERICH1	1.53751	1.53851	5.56516	7.60807e-06	0.000277151
ENSBTAG00000039340	538100	sodium voltage-gated channel beta subunit 4 [Source:VGNC Symbol;Acc:VGNC:34351]	SCN4B	-3.54785	1.95373	7.61886e-06	0.000276864		ENSBTAG00000018879	529894	zinc finger protein 451 [Source:VGNC Symbol;Acc:VGNC:37279]	ZNF451	2.46911	2.4809	3.21921	7.62675e-06	0.000277151
ENSBTAG00000003832	281912	microfibril associated protein 2 [Source:VGNC Symbol;Acc:VGNC:31422]	MFAP2	-4.28358	3.10752	7.90916e-06	0.00028639		ENSBTAG00000010465	616423	chromosome 29 C11orf98 homolog [Source:NCBI gene (formerly Entrezgene);Acc:616423]	C29H11orf98	2.33726	2.34186	4.33657	7.6938e-06	0.000278592
ENSBTAG00000013905	281729	structural maintenance of chromosomes 3 [Source:VGNC Symbol;Acc:VGNC:35000]	SMC3	1.3435	7.15939	7.98215e-06	0.00028731		ENSBTAG00000048707	#N/A	0	0	3.72898	3.79127	2.206	7.89856e-06	0.000284187
ENSBTAG00000000011	511957	L-threonine dehydrogenase [Source:NCBI gene (formerly Entrezgene);Acc:511957]	TDH	4.36819	1.91527	7.99104e-06	0.00028731		ENSBTAG00000010119	535075	aldehyde dehydrogenase 1 family member A2 [Source:VGNC Symbol;Acc:VGNC:25809]	ALDH1A2	1.35403	1.35499	5.62985	7.90417e-06	0.000284187
ENSBTAG00000009778	541140	KRAS proto-oncogene, GTPase [Source:VGNC Symbol;Acc:VGNC:30710]	KRAS	1.59911	4.77123	8.02559e-06	0.000287537		ENSBTAG00000016199	538540	clathrin interactor 1 [Source:VGNC Symbol;Acc:VGNC:27443]	CLINT1	1.8942	1.89508	6.2308	7.98097e-06	0.000285938
ENSBTAG00000021726	781016	CWC22 spliceosome associated protein homolog [Source:VGNC Symbol;Acc:VGNC:27841]	CWC22	1.65363	5.06931	8.25506e-06	0.00029472		ENSBTAG00000020928	519627	ADP-ribosylhydrolase like 1 [Source:NCBI gene (formerly Entrezgene);Acc:519627]	ADPRHL1	-2.89099	-2.89877	4.05696	8.04752e-06	0.000286328
ENSBTAG00000018374	504482	WASP family member 2 [Source:VGNC Symbol;Acc:VGNC:36866]	WASF2	3.01156	4.03506	8.32169e-06	0.00029606		ENSBTAG00000007806	541099	myotrophin [Source:VGNC Symbol;Acc:VGNC:50020]	MTPN	1.44855	1.44902	6.70089	8.04813e-06	0.000286328
ENSBTAG00000015101	540444	high mobility group box 2 [Source:NCBI gene (formerly Entrezgene);Acc:540444]	HMGB2	1.63938	4.52669	8.40002e-06	0.000297793		ENSBTAG00000004159	#N/A	#N/A	#N/A	3.41236	3.46252	2.10953	8.21828e-06	0.000291362
ENSBTAG00000035907	510093	DEAD-box helicase 3 X-linked [Source:VGNC Symbol;Acc:VGNC:56526]	DDX3X	1.85714	4.83251	8.42893e-06	0.000297793		ENSBTAG00000021164	529366	sarcolemma associated protein [Source:VGNC Symbol;Acc:VGNC:34969]	SLMAP	1.76132	1.76432	4.40823	8.3599e-06	0.000295354
ENSBTAG00000004190	504657	Rho GTPase activating protein 29 [Source:VGNC Symbol;Acc:VGNC:26087]	ARHGAP29	1.18525	7.18937	8.46284e-06	0.000297956		ENSBTAG00000007273	280705	transferrin [Source:NCBI gene (formerly Entrezgene);Acc:280705]	TF	-2.92323	-2.942	3.21138	8.69915e-06	0.000306276
ENSBTAG00000021752	541274	DnaJ heat shock protein family (Hsp40) member B4 [Source:VGNC Symbol;Acc:VGNC:55166]	DNAJB4	1.90166	3.86912	8.645e-06	0.000302557		ENSBTAG00000000081	286797	ceramide transporter 1 [Source:VGNC Symbol;Acc:VGNC:27566]	CERT1	1.96919	1.97328	4.29412	9.18163e-06	0.000322149
ENSBTAG00000015965	506983	zinc finger CCCH-type containing 8 [Source:VGNC Symbol;Acc:VGNC:37110]	ZC3H8	1.72186	4.66047	8.65358e-06	0.000302557		ENSBTAG00000000497	618607	aldo-keto reductase family 1 member A1 [Source:VGNC Symbol;Acc:VGNC:25795]	AKR1A1	-1.22503	-1.22526	7.20753	9.25373e-06	0.000323563
ENSBTAG00000018016	614673	nuclear protein 1, transcriptional regulator [Source:VGNC Symbol;Acc:VGNC:32369]	NUPR1	-3.17708	3.46896	8.68271e-06	0.000302557		ENSBTAG00000052146	534309	Myb/SANT DNA binding domain containing 3 [Source:NCBI gene (formerly Entrezgene);Acc:534309]	MSANTD3	-3.10881	-3.18376	1.48767	9.49598e-06	0.000330896
ENSBTAG00000038116	#N/A	0	0	3.28649	2.13476	8.72823e-06	0.000303105		ENSBTAG00000021957	281905	latent transforming growth factor beta binding protein 2 [Source:VGNC Symbol;Acc:VGNC:31072]	LTBP2	2.27676	2.28477	3.98118	9.85237e-06	0.000342143
ENSBTAG00000020538	514373	HECT and RLD domain containing E3 ubiquitin protein ligase 5 [Source:VGNC Symbol;Acc:VGNC:29814]	HERC5	1.8835	4.81869	8.8615e-06	0.000306686		ENSBTAG00000051782	522920	ATPase family AAA domain containing 2 [Source:NCBI gene (formerly Entrezgene);Acc:522920]	ATAD2	2.18447	2.18553	6.38629	1.00226e-05	0.000346869
ENSBTAG00000033690	530961	BRCA1 associated RING domain 1 [Source:VGNC Symbol;Acc:VGNC:26420]	BARD1	2.06274	3.11996	8.9534e-06	0.000308817		ENSBTAG00000026369	617091	ectodermal-neural cortex 1 [Source:VGNC Symbol;Acc:VGNC:28489]	ENC1	1.18373	1.18388	7.71341	1.01498e-05	0.000350084
ENSBTAG00000047293	524960	nuclear receptor interacting protein 1 [Source:VGNC Symbol;Acc:VGNC:32263]	NRIP1	2.67285	3.27512	9.09027e-06	0.000312478		ENSBTAG00000011721	524868	mediator complex subunit 13 [Source:VGNC Symbol;Acc:VGNC:31350]	MED13	1.73445	1.73722	4.44141	1.01979e-05	0.000350553
ENSBTAG00000046373	#N/A	#N/A	#N/A	3.68864	5.11716	9.21353e-06	0.000315649		ENSBTAG00000004423	508009	Rho GTPase activating protein 42 [Source:VGNC Symbol;Acc:VGNC:26096]	ARHGAP42	3.08323	3.14271	1.7435	1.03825e-05	0.000355698
ENSBTAG00000003880	514291	elastin microfibril interfacer 2 [Source:VGNC Symbol;Acc:VGNC:28474]	EMILIN2	-3.73319	4.11725	9.37392e-06	0.000320066		ENSBTAG00000017713	537619	kinectin 1 [Source:VGNC Symbol;Acc:VGNC:30756]	KTN1	1.41367	1.41387	7.74141	1.04418e-05	0.000356527
ENSBTAG00000013658	519271	ELKS/RAB6-interacting/CAST family member 1 [Source:VGNC Symbol;Acc:VGNC:28566]	ERC1	3.1809	3.11473	9.45606e-06	0.000321791		ENSBTAG00000006546	281805	glutathione S-transferase alpha 2 [Source:NCBI gene (formerly Entrezgene);Acc:281805]	GSTA2	-2.38702	-2.39404	4.11207	1.06996e-05	0.00036411
ENSBTAG00000007067	#N/A	zinc finger CCCH-type containing 13 [Source:VGNC Symbol;Acc:VGNC:37101]	ZC3H13	2.03982	3.32858	9.57759e-06	0.00032484		ENSBTAG00000014399	537018	glutamine and serine rich 1 [Source:VGNC Symbol;Acc:VGNC:33604]	QSER1	1.38756	1.38829	5.83167	1.09011e-05	0.000366921
ENSBTAG00000004840	767827	complement C1s [Source:VGNC Symbol;Acc:VGNC:26630]	C1S	-2.0553	4.44743	9.61223e-06	0.000324861		ENSBTAG00000014205	100139910	protein kinase cAMP-dependent type II regulatory subunit alpha [Source:VGNC Symbol;Acc:VGNC:33325]	PRKAR2A	2.14375	2.14696	4.72667	1.09052e-05	0.000366921
ENSBTAG00000010289	515968	gem nuclear organelle associated protein 8 [Source:VGNC Symbol;Acc:VGNC:29321]	GEMIN8	-1.32754	6.06134	9.64208e-06	0.000324861		ENSBTAG00000020735	525143	SMG1 nonsense mediated mRNA decay associated PI3K related kinase [Source:VGNC Symbol;Acc:VGNC:35010]	SMG1	1.80117	1.80332	4.783	1.09222e-05	0.000366921
ENSBTAG00000003384	512152	centrosomal protein 162 [Source:VGNC Symbol;Acc:VGNC:27195]	CEP162	1.76584	3.70493	9.71379e-06	0.000326197		ENSBTAG00000017380	#N/A	myosin XVIIIA [Source:VGNC Symbol;Acc:VGNC:31813]	MYO18A	2.45809	2.46436	4.00429	1.09265e-05	0.000366921
ENSBTAG00000005137	541208	lysophosphatidylglycerol acyltransferase 1 [Source:VGNC Symbol;Acc:VGNC:30965]	LPGAT1	2.00804	3.58959	9.83425e-06	0.000329128		ENSBTAG00000015101	540444	high mobility group box 2 [Source:NCBI gene (formerly Entrezgene);Acc:540444]	HMGB2	1.59997	1.60239	4.52669	1.12496e-05	0.000376529
ENSBTAG00000006667	281753	erythrocyte membrane protein band 4.1 [Source:VGNC Symbol;Acc:VGNC:28519]	EPB41	1.9557	3.83928	9.86576e-06	0.000329128		ENSBTAG00000009121	616487	stromal antigen 2 [Source:VGNC Symbol;Acc:VGNC:35354]	STAG2	1.77275	1.77614	4.22561	1.13219e-05	0.000377705
ENSBTAG00000012405	787112	platelet endothelial aggregation receptor 1 [Source:VGNC Symbol;Acc:VGNC:32734]	PEAR1	1.72781	5.05012	1.00974e-05	0.000335755		ENSBTAG00000046553	100848979	SECIS binding protein 2 like [Source:VGNC Symbol;Acc:VGNC:58410]	SECISBP2L	2.00093	2.00329	4.83158	1.16359e-05	0.000386914
ENSBTAG00000000697	540208	ribosomal RNA processing 8 [Source:VGNC Symbol;Acc:VGNC:34171]	RRP8	2.1586	3.45015	1.01894e-05	0.00033771		ENSBTAG00000001303	539524	heat shock protein family B (small) member 8 [Source:VGNC Symbol;Acc:VGNC:53907]	HSPB8	-1.45384	-1.45445	6.15008	1.19486e-05	0.000396016
ENSBTAG00000020928	519627	ADP-ribosylhydrolase like 1 [Source:NCBI gene (formerly Entrezgene);Acc:519627]	ADPRHL1	-3.00418	4.05696	1.02261e-05	0.000337826		ENSBTAG00000009477	790878	pirin [Source:VGNC Symbol;Acc:VGNC:32915]	PIR	-2.41068	-2.42689	2.83833	1.21427e-05	0.000401142
ENSBTAG00000033315	781036	DnaJ heat shock protein family (Hsp40) member C1 [Source:NCBI gene (formerly Entrezgene);Acc:781036]	DNAJC1	1.30027	5.32639	1.043e-05	0.000342679		ENSBTAG00000008703	347700	eukaryotic translation initiation factor 2 alpha kinase 2 [Source:VGNC Symbol;Acc:VGNC:28381]	EIF2AK2	2.57343	2.59898	2.14873	1.21941e-05	0.000401537
ENSBTAG00000030222	513297	L3MBTL histone methyl-lysine binding protein 2 [Source:VGNC Symbol;Acc:VGNC:30763]	L3MBTL2	2.2605	3.32349	1.04403e-05	0.000342679		ENSBTAG00000021058	100140430	DEAD-box helicase 42 [Source:VGNC Symbol;Acc:VGNC:27968]	DDX42	3.49154	3.53431	2.38796	1.23222e-05	0.000403519
ENSBTAG00000005960	538959	erythrocyte membrane protein band 4.1 like 2 [Source:VGNC Symbol;Acc:VGNC:28521]	EPB41L2	2.85539	2.59109	1.08547e-05	0.000353011		ENSBTAG00000010452	616366	podocalyxin like [Source:VGNC Symbol;Acc:VGNC:53665]	PODXL	3.49041	3.59912	1.66628	1.23336e-05	0.000403519
ENSBTAG00000053595	510459	homeobox A9 [Source:NCBI gene (formerly Entrezgene);Acc:510459]	HOXA9	-5.40069	3.34655	1.08859e-05	0.000353011		ENSBTAG00000009035	281681	centromere protein E [Source:VGNC Symbol;Acc:VGNC:27175]	CENPE	1.43875	1.43898	7.65003	1.25e-05	0.000407653
ENSBTAG00000011642	516521	RNA binding motif protein 27 [Source:NCBI gene (formerly Entrezgene);Acc:516521]	RBM27	1.78675	5.16384	1.08905e-05	0.000353011		ENSBTAG00000003607	534672	FAM20C golgi associated secretory pathway kinase [Source:VGNC Symbol;Acc:VGNC:28787]	FAM20C	-1.67673	-1.67721	6.83169	1.3061e-05	0.000423772
ENSBTAG00000009279	533901	tankyrase 2 [Source:VGNC Symbol;Acc:VGNC:36186]	TNKS2	3.86007	1.79819	1.09089e-05	0.000353011		ENSBTAG00000003880	514291	elastin microfibril interfacer 2 [Source:VGNC Symbol;Acc:VGNC:28474]	EMILIN2	-4.01132	-4.03558	4.11725	1.30776e-05	0.000423772
ENSBTAG00000026953	786759	thyroid hormone receptor interactor 11 [Source:NCBI gene (formerly Entrezgene);Acc:786759]	TRIP11	2.0107	4.91123	1.09286e-05	0.000353011		ENSBTAG00000001152	511478	TLE family member 6, subcortical maternal complex member [Source:VGNC Symbol;Acc:VGNC:52895]	TLE6	-2.28177	-2.29508	2.72272	1.31713e-05	0.000425455
ENSBTAG00000009121	616487	stromal antigen 2 [Source:VGNC Symbol;Acc:VGNC:35354]	STAG2	1.79118	4.22561	1.11024e-05	0.000357489		ENSBTAG00000003384	512152	centrosomal protein 162 [Source:VGNC Symbol;Acc:VGNC:27195]	CEP162	1.73319	1.73828	3.70493	1.32343e-05	0.000426136
ENSBTAG00000047330	281760	fatty acid binding protein 5 [Source:NCBI gene (formerly Entrezgene);Acc:281760]	FABP5	1.68316	5.17116	1.1263e-05	0.000358585		ENSBTAG00000046358	282296	poly(A) binding protein cytoplasmic 1 [Source:VGNC Symbol;Acc:VGNC:53870]	PABPC1	1.18202	1.18206	9.89735	1.32777e-05	0.000426185
ENSBTAG00000013412	538523	nuclear factor of activated T cells 5 [Source:VGNC Symbol;Acc:VGNC:32029]	NFAT5	4.11787	1.41165	1.12801e-05	0.000358585		ENSBTAG00000005773	506980	phosphoglucomutase 2 [Source:VGNC Symbol;Acc:VGNC:32794]	PGM2	2.1665	2.16944	4.6881	1.34502e-05	0.000428977
ENSBTAG00000005441	782132	zinc finger matrin-type 2 [Source:VGNC Symbol;Acc:VGNC:37191]	ZMAT2	1.20077	7.04053	1.12835e-05	0.000358585		ENSBTAG00000006756	505129	matrin 3 [Source:NCBI gene (formerly Entrezgene);Acc:505129]	MATR3	1.21096	1.21122	7.14083	1.35137e-05	0.000428977
ENSBTAG00000010185	515581	transcriptional adaptor 2B [Source:NCBI gene (formerly Entrezgene);Acc:515581]	TADA2B	3.42716	1.53166	1.12987e-05	0.000358585		ENSBTAG00000013191	525795	agrin [Source:VGNC Symbol;Acc:VGNC:25742]	AGRN	-1.39145	-1.39179	7.07005	1.35146e-05	0.000428977
ENSBTAG00000020316	282183	adaptor related protein complex 2 subunit beta 1 [Source:VGNC Symbol;Acc:VGNC:55033]	AP2B1	1.42195	8.61806	1.13126e-05	0.000358585		ENSBTAG00000014920	535644	semaphorin 3E [Source:VGNC Symbol;Acc:VGNC:34430]	SEMA3E	3.47541	3.52161	2.64882	1.35617e-05	0.000428977
ENSBTAG00000022114	614243	transmembrane protein 65 [Source:VGNC Symbol;Acc:VGNC:36106]	TMEM65	3.34046	1.94461	1.1382e-05	0.000359664		ENSBTAG00000012867	511331	taxilin alpha [Source:VGNC Symbol;Acc:VGNC:36530]	TXLNA	3.57073	3.63244	2.07885	1.35755e-05	0.000428977
ENSBTAG00000017026	540874	DEP domain containing 1B [Source:VGNC Symbol;Acc:VGNC:28005]	DEPDC1B	3.62513	1.91903	1.15924e-05	0.00036518		ENSBTAG00000015590	506286	ciliogenesis associated kinase 1 [Source:VGNC Symbol;Acc:VGNC:30028]	CILK1	2.0943	2.10171	3.31995	1.36842e-05	0.000430927
ENSBTAG00000021957	281905	latent transforming growth factor beta binding protein 2 [Source:VGNC Symbol;Acc:VGNC:31072]	LTBP2	2.11225	3.98118	1.19439e-05	0.000375089		ENSBTAG00000001992	505060	cytochrome P450, family 51, subfamily A, polypeptide 1 [Source:NCBI gene (formerly Entrezgene);Acc:505060]	CYP51A1	1.11428	1.11437	8.50071	1.37219e-05	0.000430927
ENSBTAG00000008283	529124	Fli-1 proto-oncogene, ETS transcription factor [Source:VGNC Symbol;Acc:VGNC:29031]	FLI1	4.34389	1.22829	1.21325e-05	0.00037984		ENSBTAG00000015942	528615	DnaJ heat shock protein family (Hsp40) member A4 [Source:VGNC Symbol;Acc:VGNC:53935]	DNAJA4	-1.36523	-1.36668	4.8341	1.41463e-05	0.00044289
ENSBTAG00000010465	616423	chromosome 29 C11orf98 homolog [Source:NCBI gene (formerly Entrezgene);Acc:616423]	C29H11orf98	2.30054	4.33657	1.22814e-05	0.000383323		ENSBTAG00000004037	280831	Jun proto-oncogene, AP-1 transcription factor subunit [Source:VGNC Symbol;Acc:VGNC:30386]	JUN	1.17651	1.17658	9.10047	1.42876e-05	0.000445941
ENSBTAG00000008772	539217	structural maintenance of chromosomes 2 [Source:VGNC Symbol;Acc:VGNC:34999]	SMC2	1.7172	7.17158	1.25082e-05	0.000389209		ENSBTAG00000003569	506546	DAZ interacting zinc finger protein 1 [Source:VGNC Symbol;Acc:VGNC:28284]	DZIP1	1.44852	1.44894	6.99342	1.43847e-05	0.000446615
ENSBTAG00000009471	509483	centrosomal protein 135 [Source:VGNC Symbol;Acc:VGNC:27193]	CEP135	1.81221	3.93963	1.26023e-05	0.000390942		ENSBTAG00000015498	532015	ELOVL fatty acid elongase 4 [Source:VGNC Symbol;Acc:VGNC:28450]	ELOVL4	2.79486	2.80592	3.42587	1.4397e-05	0.000446615
ENSBTAG00000005069	282384	transmembrane 7 superfamily member 2 [Source:VGNC Symbol;Acc:VGNC:35910]	TM7SF2	-1.52206	6.53895	1.29707e-05	0.000401146		ENSBTAG00000027713	613760	LysM domain containing 3 [Source:VGNC Symbol;Acc:VGNC:31114]	LYSMD3	3.1344	3.16158	2.48797	1.44432e-05	0.000446686
ENSBTAG00000015196	518186	PHD finger protein 6 [Source:VGNC Symbol;Acc:VGNC:97297]	PHF6	1.86011	4.27412	1.30328e-05	0.000401844		ENSBTAG00000000458	519789	dynein cytoplasmic 1 light intermediate chain 2 [Source:VGNC Symbol;Acc:VGNC:28273]	DYNC1LI2	1.53178	1.53383	4.55262	1.45472e-05	0.000448538
ENSBTAG00000010119	535075	aldehyde dehydrogenase 1 family member A2 [Source:VGNC Symbol;Acc:VGNC:25809]	ALDH1A2	1.30872	5.62985	1.32615e-05	0.00040766		ENSBTAG00000021980	515639	Ras association domain family member 8 [Source:VGNC Symbol;Acc:VGNC:33764]	RASSF8	1.40647	1.40773	5.11928	1.46215e-05	0.000449466
ENSBTAG00000000087	789567	hydroxysteroid 17-beta dehydrogenase 12 [Source:VGNC Symbol;Acc:VGNC:54883]	HSD17B12	2.01273	4.37434	1.33545e-05	0.000409284		ENSBTAG00000000087	789567	hydroxysteroid 17-beta dehydrogenase 12 [Source:VGNC Symbol;Acc:VGNC:54883]	HSD17B12	2.00314	2.00706	4.37434	1.49286e-05	0.000457525
ENSBTAG00000020569	282608	calcium voltage-gated channel auxiliary subunit alpha2delta 1 [Source:VGNC Symbol;Acc:VGNC:26679]	CACNA2D1	4.28551	1.53339	1.35163e-05	0.000412997		ENSBTAG00000013455	510817	speckle type BTB/POZ protein like [Source:VGNC Symbol;Acc:VGNC:35230]	SPOPL	3.7606	3.85321	1.72651	1.51584e-05	0.000463172
ENSBTAG00000019455	514078	myosin VB [Source:VGNC Symbol;Acc:VGNC:31827]	MYO5B	-2.81202	1.83193	1.3594e-05	0.000414129		ENSBTAG00000006824	517850	adaptor protein, phosphotyrosine interacting with PH domain and leucine zipper 1 [Source:VGNC Symbol;Acc:VGNC:26040]	APPL1	1.27733	1.27767	6.80217	1.53378e-05	0.000467253
ENSBTAG00000021601	539687	par-6 family cell polarity regulator beta [Source:VGNC Symbol;Acc:VGNC:32584]	PARD6B	2.39973	3.40981	1.37483e-05	0.00041758		ENSBTAG00000013204	523889	ATPase 13A3 [Source:VGNC Symbol;Acc:VGNC:26279]	ATP13A3	2.98658	2.99584	3.95471	1.57108e-05	0.000477185
ENSBTAG00000030575	#N/A	#N/A	#N/A	3.80551	1.19618	1.38185e-05	0.000417721		ENSBTAG00000008716	338071	small RNA binding exonuclease protection factor La [Source:VGNC Symbol;Acc:VGNC:58554]	SSB	1.39512	1.39525	8.20589	1.58389e-05	0.000479645
ENSBTAG00000005456	524925	TTK protein kinase [Source:VGNC Symbol;Acc:VGNC:36487]	TTK	1.5639	4.97268	1.38351e-05	0.000417721		ENSBTAG00000005456	524925	TTK protein kinase [Source:VGNC Symbol;Acc:VGNC:36487]	TTK	1.5391	1.54074	4.97268	1.5932e-05	0.000481032
ENSBTAG00000001152	511478	TLE family member 6, subcortical maternal complex member [Source:VGNC Symbol;Acc:VGNC:52895]	TLE6	-2.4168	2.72272	1.39172e-05	0.000418956		ENSBTAG00000019267	282872	matrix metallopeptidase 2 [Source:VGNC Symbol;Acc:VGNC:31524]	MMP2	-1.74212	-1.74374	5.13148	1.61475e-05	0.000486098
ENSBTAG00000054239	100337161	kinesin family member 1B [Source:NCBI gene (formerly Entrezgene);Acc:100337161]	0	2.14881	3.40767	1.40308e-05	0.00042113		ENSBTAG00000021726	781016	CWC22 spliceosome associated protein homolog [Source:VGNC Symbol;Acc:VGNC:27841]	CWC22	1.54832	1.54978	5.06931	1.67068e-05	0.000501034
ENSBTAG00000018879	529894	zinc finger protein 451 [Source:VGNC Symbol;Acc:VGNC:37279]	ZNF451	2.37507	3.21921	1.40979e-05	0.0004219		ENSBTAG00000032521	100299044	pleckstrin homology, MyTH4 and FERM domain containing H2 [Source:VGNC Symbol;Acc:VGNC:33021]	PLEKHH2	2.93939	2.97484	2.12436	1.68041e-05	0.000501034
ENSBTAG00000021343	503575	Rho guanine nucleotide exchange factor 12 [Source:VGNC Symbol;Acc:VGNC:26106]	ARHGEF12	1.85467	5.05714	1.44439e-05	0.000430989		ENSBTAG00000008283	529124	Fli-1 proto-oncogene, ETS transcription factor [Source:VGNC Symbol;Acc:VGNC:29031]	FLI1	3.54791	3.65702	1.22829	1.68044e-05	0.000501034
ENSBTAG00000008703	347700	eukaryotic translation initiation factor 2 alpha kinase 2 [Source:VGNC Symbol;Acc:VGNC:28381]	EIF2AK2	2.73044	2.14873	1.4836e-05	0.000441118		ENSBTAG00000019755	512704	receptor accessory protein 3 [Source:VGNC Symbol;Acc:VGNC:33853]	REEP3	1.35616	1.35747	5.09111	1.68407e-05	0.000501034
ENSBTAG00000009663	533297	Y-box binding protein 3 [Source:VGNC Symbol;Acc:VGNC:37018]	YBX3	2.83039	7.02552	1.48701e-05	0.000441118		ENSBTAG00000005145	786652	pseudopodium enriched atypical kinase 1 [Source:VGNC Symbol;Acc:VGNC:32733]	PEAK1	2.22367	2.23676	2.83193	1.72455e-05	0.000511582
ENSBTAG00000018152	506295	myeloid associated differentiation marker [Source:NCBI gene (formerly Entrezgene);Acc:506295]	MYADM	2.81038	5.0118	1.52454e-05	0.000450936		ENSBTAG00000001768	515927	taxilin gamma [Source:VGNC Symbol;Acc:VGNC:36532]	TXLNG	1.66099	1.66209	5.59897	1.73276e-05	0.000512525
ENSBTAG00000000586	533903	ciliogenesis and planar polarity effector 1 [Source:VGNC Symbol;Acc:VGNC:59329]	CPLANE1	1.56645	4.40566	1.53527e-05	0.000452792		ENSBTAG00000005967	527153	ubiquitin protein ligase E3 component n-recognin 2 [Source:VGNC Symbol;Acc:VGNC:36617]	UBR2	2.04523	2.05406	3.2129	1.74891e-05	0.000515038
ENSBTAG00000021237	535297	dystonin [Source:NCBI gene (formerly Entrezgene);Acc:535297]	0	1.78818	4.0078	1.54751e-05	0.000455083		ENSBTAG00000012586	511913	heat shock protein family D (Hsp60) member 1 [Source:VGNC Symbol;Acc:VGNC:49070]	HSPD1	3.01998	3.02161	6.54132	1.75138e-05	0.000515038
ENSBTAG00000051080	112443502	uncharacterized LOC112443502 [Source:NCBI gene (formerly Entrezgene);Acc:112443502]	0	2.69213	3.37283	1.57102e-05	0.000460666		ENSBTAG00000003771	#N/A	#N/A	#N/A	4.09223	4.1333	3.24319	1.75736e-05	0.000515308
ENSBTAG00000021024	506730	microtubule actin crosslinking factor 1 [Source:VGNC Symbol;Acc:VGNC:55610]	MACF1	1.72862	5.87829	1.61299e-05	0.000471616		ENSBTAG00000014373	532953	centrin 3 [Source:VGNC Symbol;Acc:VGNC:27235]	CETN3	1.45521	1.45536	8.15353	1.77424e-05	0.00051728
ENSBTAG00000001736	525895	ubinuclein 1 [Source:VGNC Symbol;Acc:VGNC:36610]	UBN1	1.71028	5.93613	1.63211e-05	0.000474857		ENSBTAG00000020281	510366	ninein [Source:VGNC Symbol;Acc:VGNC:32077]	NIN	1.88403	1.88997	3.53949	1.77565e-05	0.00051728
ENSBTAG00000008716	338071	small RNA binding exonuclease protection factor La [Source:VGNC Symbol;Acc:VGNC:58554]	SSB	1.39719	8.20589	1.63342e-05	0.000474857		ENSBTAG00000017310	516536	eva-1 homolog C [Source:VGNC Symbol;Acc:VGNC:28633]	EVA1C	-3.52651	-3.64101	1.54848	1.77934e-05	0.00051728
ENSBTAG00000017856	615465	thiosulfate sulfurtransferase like domain containing 1 [Source:VGNC Symbol;Acc:VGNC:50177]	TSTD1	-1.57452	5.81957	1.67659e-05	0.000486019		ENSBTAG00000009983	515748	kinesin family member 23 [Source:VGNC Symbol;Acc:VGNC:55119]	KIF23	1.4549	1.45574	5.94999	1.79139e-05	0.000519299
ENSBTAG00000003259	540964	transcription elongation regulator 1 [Source:VGNC Symbol;Acc:VGNC:35685]	TCERG1	1.26297	7.78303	1.68457e-05	0.000486947		ENSBTAG00000054750	#N/A	0	0	3.13937	3.24525	1.64845	1.81374e-05	0.000524283
ENSBTAG00000013821	516289	RIO kinase 1 [Source:VGNC Symbol;Acc:VGNC:50051]	RIOK1	1.5998	6.25968	1.70816e-05	0.000492366		ENSBTAG00000030600	514131	bucentaur-2 [Source:NCBI gene (formerly Entrezgene);Acc:514131]	BCNT2	2.3599	2.36265	5.15627	1.82479e-05	0.000525984
ENSBTAG00000001768	515927	taxilin gamma [Source:VGNC Symbol;Acc:VGNC:36532]	TXLNG	1.68417	5.59897	1.71417e-05	0.000492702		ENSBTAG00000009482	541306	AF4/FMR2 family member 4 [Source:VGNC Symbol;Acc:VGNC:25712]	AFF4	1.71955	1.72462	3.61372	1.89006e-05	0.000541312
ENSBTAG00000005738	541187	ATPase phospholipid transporting 8B1 [Source:VGNC Symbol;Acc:VGNC:26330]	ATP8B1	3.08072	1.69121	1.74735e-05	0.000500826		ENSBTAG00000019588	#N/A	#N/A	#N/A	-6.86503	-1.44269e+08	1.35769	1.89238e-05	0.000541312
ENSBTAG00000001660	539967	SPT2 chromatin protein domain containing 1 [Source:VGNC Symbol;Acc:VGNC:35261]	SPTY2D1	2.16725	3.89853	1.77696e-05	0.00050788		ENSBTAG00000016367	508615	RNA binding motif protein 18 [Source:VGNC Symbol;Acc:VGNC:33789]	RBM18	1.4184	1.41945	5.31731	1.89393e-05	0.000541312
ENSBTAG00000021607	767961	NADH:ubiquinone oxidoreductase complex assembly factor 2 [Source:VGNC Symbol;Acc:VGNC:31954]	NDUFAF2	2.06017	3.5618	1.79542e-05	0.000510551		ENSBTAG00000023867	783330	ring finger and CCCH-type domains 2 [Source:VGNC Symbol;Acc:VGNC:33819]	RC3H2	3.06035	3.11388	1.61448	1.90757e-05	0.000543684
ENSBTAG00000003675	788252	adhesion G protein-coupled receptor L1 [Source:VGNC Symbol;Acc:VGNC:25671]	ADGRL1	-1.78329	3.30176	1.79634e-05	0.000510551		ENSBTAG00000008862	532923	golgin B1 [Source:VGNC Symbol;Acc:VGNC:29489]	GOLGB1	1.36365	1.36413	6.52749	1.92084e-05	0.000545937
ENSBTAG00000001920	535323	DNA polymerase theta [Source:VGNC Symbol;Acc:VGNC:33130]	POLQ	2.40709	2.4125	1.81529e-05	0.000514095		ENSBTAG00000008028	508266	chimerin 1 [Source:VGNC Symbol;Acc:VGNC:27307]	CHN1	2.51729	2.53845	2.6087	1.93378e-05	0.000548084
ENSBTAG00000005147	510165	HPS5 biogenesis of lysosomal organelles complex 2 subunit 2 [Source:VGNC Symbol;Acc:VGNC:29946]	HPS5	1.58311	4.05071	1.8224e-05	0.000514095		ENSBTAG00000005069	282384	transmembrane 7 superfamily member 2 [Source:VGNC Symbol;Acc:VGNC:35910]	TM7SF2	-1.47542	-1.47592	6.53895	1.94226e-05	0.000548959
ENSBTAG00000018796	516619	Rab geranylgeranyltransferase subunit alpha [Source:VGNC Symbol;Acc:VGNC:33670]	RABGGTA	-1.3945	5.55073	1.82724e-05	0.000514095		ENSBTAG00000019513	617008	chromosome 11 C9orf50 homolog [Source:VGNC Symbol;Acc:VGNC:52622]	C11H9orf50	-1.72281	-1.72574	4.14509	1.9649e-05	0.000552984
ENSBTAG00000002029	511594	immunoglobulin superfamily member 5 [Source:VGNC Symbol;Acc:VGNC:50201]	IGSF5	-3.13951	3.78983	1.82902e-05	0.000514095		ENSBTAG00000001364	767944	diphthamine biosynthesis 6 [Source:VGNC Symbol;Acc:VGNC:28181]	DPH6	-1.48827	-1.49011	5.03171	1.96737e-05	0.000552984
ENSBTAG00000054926	#N/A	0	0	1.89898	4.22245	1.86405e-05	0.000522439		ENSBTAG00000002418	529868	TOPBP1 interacting checkpoint and replication regulator [Source:VGNC Symbol;Acc:VGNC:35860]	TICRR	2.74585	2.78913	1.71427	1.97397e-05	0.000553309
ENSBTAG00000017416	535090	karyopherin subunit alpha 4 [Source:VGNC Symbol;Acc:VGNC:30703]	KPNA4	2.79488	4.62824	1.87214e-05	0.000522439		ENSBTAG00000007196	513463	transgelin [Source:VGNC Symbol;Acc:VGNC:35585]	TAGLN	3.23566	3.24334	4.80622	1.98968e-05	0.000556181
ENSBTAG00000011643	537682	SOS Ras/Rac guanine nucleotide exchange factor 1 [Source:VGNC Symbol;Acc:VGNC:35134]	SOS1	3.74555	1.98619	1.87434e-05	0.000522439		ENSBTAG00000051080	112443502	uncharacterized LOC112443502 [Source:NCBI gene (formerly Entrezgene);Acc:112443502]	0	2.61438	2.62664	3.37283	2.00954e-05	0.000559425
ENSBTAG00000000081	286797	ceramide transporter 1 [Source:VGNC Symbol;Acc:VGNC:27566]	CERT1	1.83675	4.29412	1.87924e-05	0.000522439		ENSBTAG00000008353	513497	cyclin dependent kinase inhibitor 1A [Source:VGNC Symbol;Acc:VGNC:27142]	CDKN1A	-1.31864	-1.31868	9.81627	2.01228e-05	0.000559425
ENSBTAG00000014515	514842	replication factor C subunit 1 [Source:NCBI gene (formerly Entrezgene);Acc:514842]	RFC1	2.20964	5.99707	1.88633e-05	0.000522981		ENSBTAG00000001867	539378	sacsin molecular chaperone [Source:VGNC Symbol;Acc:VGNC:34260]	SACS	2.65143	2.66106	3.64418	2.01812e-05	0.000559519
ENSBTAG00000011524	540834	5'-3' exoribonuclease 1 [Source:VGNC Symbol;Acc:VGNC:37008]	XRN1	1.77666	4.46612	1.90184e-05	0.000525127		ENSBTAG00000012077	541239	SMC5-SMC6 complex localization factor 2 [Source:VGNC Symbol;Acc:VGNC:34958]	SLF2	2.35925	2.3703	3.23337	2.02653e-05	0.000560325
ENSBTAG00000011155	540170	pumilio RNA binding family member 2 [Source:VGNC Symbol;Acc:VGNC:33570]	PUM2	3.15509	1.97574	1.90439e-05	0.000525127		ENSBTAG00000020421	514989	SPT16 homolog, facilitates chromatin remodeling subunit [Source:VGNC Symbol;Acc:VGNC:35478]	SUPT16H	1.2591	1.25938	7.14151	2.07702e-05	0.000572727
ENSBTAG00000018661	505575	transmembrane channel like 6 [Source:VGNC Symbol;Acc:VGNC:35922]	TMC6	-1.37155	5.94766	1.91435e-05	0.000526447		ENSBTAG00000017836	786262	ZFP57 zinc finger protein [Source:VGNC Symbol;Acc:VGNC:37165]	ZFP57	3.73352	3.78044	2.63292	2.08331e-05	0.000572911
ENSBTAG00000044105	506618	forkhead box O1 [Source:VGNC Symbol;Acc:VGNC:29098]	FOXO1	2.47042	2.97016	1.9248e-05	0.000527894		ENSBTAG00000003378	506187	ArfGAP with coiled-coil, ankyrin repeat and PH domains 2 [Source:VGNC Symbol;Acc:VGNC:25527]	ACAP2	3.06767	3.12707	1.74849	2.12148e-05	0.000581833
ENSBTAG00000004723	513262	testis expressed 2 [Source:VGNC Symbol;Acc:VGNC:35763]	TEX2	-1.51632	5.75349	1.94609e-05	0.000532297		ENSBTAG00000000175	539533	NEDD4 binding protein 2 [Source:VGNC Symbol;Acc:VGNC:53766]	N4BP2	1.99547	2.00359	3.24025	2.13458e-05	0.000583854
ENSBTAG00000025219	100848263	schlafen family member 12 [Source:NCBI gene (formerly Entrezgene);Acc:100848263]	0	6.60591	0.799892	1.95734e-05	0.000533939		ENSBTAG00000006974	528261	pleckstrin homology domain containing A7 [Source:VGNC Symbol;Acc:VGNC:33008]	PLEKHA7	-2.71346	-2.73785	2.73556	2.1605e-05	0.00058936
ENSBTAG00000050526	#N/A	0	0	-1.99344	3.02282	2.04411e-05	0.000556119		ENSBTAG00000013821	516289	RIO kinase 1 [Source:VGNC Symbol;Acc:VGNC:50051]	RIOK1	1.54935	1.54994	6.25968	2.17666e-05	0.000591952
ENSBTAG00000017457	526376	serine/threonine kinase 10 [Source:VGNC Symbol;Acc:VGNC:35384]	STK10	2.06485	4.53478	2.10203e-05	0.000567737		ENSBTAG00000021526	#N/A	#N/A	#N/A	2.98292	3.00357	2.83477	2.18164e-05	0.000591952
ENSBTAG00000014752	533105	A-kinase anchoring protein 11 [Source:VGNC Symbol;Acc:VGNC:25781]	AKAP11	2.31102	2.96821	2.10256e-05	0.000567737		ENSBTAG00000017440	509278	methyltransferase like 16 [Source:VGNC Symbol;Acc:VGNC:55844]	METTL16	2.15763	2.16932	2.8589	2.19845e-05	0.000593647
ENSBTAG00000043570	#N/A	0	0	1.89831	15.7276	2.10824e-05	0.000567737		ENSBTAG00000002029	511594	immunoglobulin superfamily member 5 [Source:VGNC Symbol;Acc:VGNC:50201]	IGSF5	-3.01771	-3.02911	3.78983	2.19956e-05	0.000593647
ENSBTAG00000014127	282023	prostaglandin-endoperoxide synthase 2 [Source:VGNC Symbol;Acc:VGNC:33512]	PTGS2	2.11387	9.09311	2.10914e-05	0.000567737		ENSBTAG00000019262	787696	DNA topoisomerase II alpha [Source:VGNC Symbol;Acc:VGNC:49583]	TOP2A	1.70304	1.70317	8.7539	2.24169e-05	0.000603417
ENSBTAG00000007430	513045	MYB binding protein 1a [Source:VGNC Symbol;Acc:VGNC:31777]	MYBBP1A	1.73493	7.04507	2.13464e-05	0.000573086		ENSBTAG00000019197	785666	transcription activation suppressor family member 2 [Source:VGNC Symbol;Acc:VGNC:28784]	TASOR2	3.04985	3.10329	1.94225	2.25165e-05	0.000604501
ENSBTAG00000004238	507012	transforming acidic coiled-coil containing protein 1 [Source:VGNC Symbol;Acc:VGNC:35557]	TACC1	2.10401	4.65554	2.14529e-05	0.000574429		ENSBTAG00000054926	#N/A	0	0	1.85877	1.86252	4.22245	2.26026e-05	0.000605216
ENSBTAG00000020533	539922	F-box protein 34 [Source:VGNC Symbol;Acc:VGNC:28907]	FBXO34	2.15126	2.59344	2.15696e-05	0.000576039		ENSBTAG00000044427	#N/A	#N/A	#N/A	2.84547	2.90354	1.49231	2.27586e-05	0.00060626
ENSBTAG00000002418	529868	TOPBP1 interacting checkpoint and replication regulator [Source:VGNC Symbol;Acc:VGNC:35860]	TICRR	2.86838	1.71427	2.20638e-05	0.000587693		ENSBTAG00000046142	505370	protein kinase cAMP-dependent type I regulatory subunit beta [Source:VGNC Symbol;Acc:VGNC:58609]	PRKAR1B	-2.10202	-2.10696	4.21976	2.27608e-05	0.00060626
ENSBTAG00000006142	509583	DEAH-box helicase 36 [Source:VGNC Symbol;Acc:VGNC:28054]	DHX36	1.39511	6.04315	2.22639e-05	0.000591475		ENSBTAG00000001877	767875	high mobility group nucleosome binding domain 5 [Source:VGNC Symbol;Acc:VGNC:56709]	HMGN5	-1.39904	-1.40006	5.58623	2.32619e-05	0.000617591
ENSBTAG00000006276	511774	C1q and TNF related 1 [Source:VGNC Symbol;Acc:VGNC:26622]	C1QTNF1	-1.39602	6.90836	2.23537e-05	0.000592315		ENSBTAG00000005847	282041	Rho associated coiled-coil containing protein kinase 2 [Source:VGNC Symbol;Acc:VGNC:34082]	ROCK2	1.68864	1.68914	6.93197	2.33076e-05	0.000617591
ENSBTAG00000026915	534671	NIMA related kinase 1 [Source:VGNC Symbol;Acc:VGNC:31991]	NEK1	1.77071	3.73268	2.24249e-05	0.000592657		ENSBTAG00000048903	281427	prion protein [Source:NCBI gene (formerly Entrezgene);Acc:281427]	PRNP	1.84764	1.85778	2.85629	2.33889e-05	0.000618136
ENSBTAG00000007130	533375	ESF1 nucleolar pre-rRNA processing protein homolog [Source:VGNC Symbol;Acc:VGNC:28601]	ESF1	1.24134	6.73302	2.25438e-05	0.000594256		ENSBTAG00000018152	506295	myeloid associated differentiation marker [Source:NCBI gene (formerly Entrezgene);Acc:506295]	MYADM	2.77024	2.77528	5.0118	2.34516e-05	0.000618186
ENSBTAG00000021592	505061	WRN RecQ like helicase [Source:VGNC Symbol;Acc:VGNC:59444]	WRN	1.60522	4.25061	2.26172e-05	0.000594652		ENSBTAG00000019534	407144	tRNA nucleotidyl transferase 1 [Source:VGNC Symbol;Acc:VGNC:36377]	TRNT1	2.46461	2.48204	2.74722	2.35629e-05	0.000619068
ENSBTAG00000006656	533251	RAN binding protein 1 [Source:NCBI gene (formerly Entrezgene);Acc:533251]	RANBP1	1.12596	7.90258	2.27453e-05	0.000596477		ENSBTAG00000007236	525337	pericentriolar material 1 [Source:VGNC Symbol;Acc:VGNC:32634]	PCM1	1.44187	1.44233	6.63696	2.36067e-05	0.000619068
ENSBTAG00000043949	532789	pro-apoptotic WT1 regulator [Source:NCBI gene (formerly Entrezgene);Acc:532789]	PAWR	1.32258	6.48494	2.28473e-05	0.000597613		ENSBTAG00000002614	539779	RUN and FYVE domain containing 2 [Source:VGNC Symbol;Acc:VGNC:34214]	RUFY2	2.39791	2.42409	2.07433	2.37492e-05	0.000621204
ENSBTAG00000003546	510059	transcription factor A, mitochondrial [Source:VGNC Symbol;Acc:VGNC:35775]	TFAM	2.89504	2.48211	2.29852e-05	0.000599678		ENSBTAG00000006734	533796	BICD cargo adaptor 1 [Source:VGNC Symbol;Acc:VGNC:26491]	BICD1	3.16309	3.2303	1.89374	2.40172e-05	0.000626603
ENSBTAG00000030567	539043	outer dense fiber of sperm tails 2 [Source:VGNC Symbol;Acc:VGNC:32401]	ODF2	1.71956	3.76812	2.34182e-05	0.000609412		ENSBTAG00000006241	282272	mannosidase alpha class 2B member 1 [Source:NCBI gene (formerly Entrezgene);Acc:282272]	MAN2B1	-1.17881	-1.17911	6.748	2.45685e-05	0.000639347
ENSBTAG00000044175	506404	centromere protein K [Source:VGNC Symbol;Acc:VGNC:27179]	CENPK	1.44458	5.83732	2.37622e-05	0.000616786		ENSBTAG00000053105	539347	transmembrane protein 263 [Source:NCBI gene (formerly Entrezgene);Acc:539347]	TMEM263	3.57391	3.60698	2.88429	2.49017e-05	0.000646364
ENSBTAG00000003183	537455	netrin 4 [Source:VGNC Symbol;Acc:VGNC:32306]	NTN4	1.31627	6.28524	2.39461e-05	0.000619978		ENSBTAG00000033304	617047	transcriptional and immune response regulator [Source:VGNC Symbol;Acc:VGNC:49157]	TCIM	1.67169	1.67245	6.11428	2.50452e-05	0.000648436
ENSBTAG00000044161	#N/A	#N/A	#N/A	5.22205	1.56257	2.41621e-05	0.000623695		ENSBTAG00000002382	528483	DEAD-box helicase 10 [Source:VGNC Symbol;Acc:VGNC:27956]	DDX10	1.22616	1.22694	5.75183	2.53058e-05	0.000652055
ENSBTAG00000022520	353120	BRCA1 DNA repair associated [Source:VGNC Symbol;Acc:VGNC:55781]	BRCA1	2.13893	3.97725	2.42123e-05	0.000623695		ENSBTAG00000006828	535383	Rap guanine nucleotide exchange factor 3 [Source:VGNC Symbol;Acc:VGNC:33724]	RAPGEF3	-1.74867	-1.75123	4.43706	2.53635e-05	0.000652055
ENSBTAG00000047206	#N/A	#N/A	#N/A	4.41473	1.60583	2.43009e-05	0.000624399		ENSBTAG00000014041	539249	G3BP stress granule assembly factor 2 [Source:VGNC Symbol;Acc:VGNC:29177]	G3BP2	1.54166	1.5442	4.33688	2.53773e-05	0.000652055
ENSBTAG00000017380	#N/A	myosin XVIIIA [Source:VGNC Symbol;Acc:VGNC:31813]	MYO18A	2.35623	4.00429	2.45771e-05	0.000629904		ENSBTAG00000017856	615465	thiosulfate sulfurtransferase like domain containing 1 [Source:VGNC Symbol;Acc:VGNC:50177]	TSTD1	-1.53248	-1.53343	5.81957	2.56325e-05	0.000656955
ENSBTAG00000001178	788351	ubiquitin specific peptidase like 1 [Source:VGNC Symbol;Acc:VGNC:36740]	USPL1	2.60644	2.05129	2.49038e-05	0.000636673		ENSBTAG00000021323	536149	ArfGAP with FG repeats 1 [Source:VGNC Symbol;Acc:VGNC:25725]	AGFG1	1.21375	1.21429	6.04296	2.57189e-05	0.000657513
ENSBTAG00000006974	528261	pleckstrin homology domain containing A7 [Source:VGNC Symbol;Acc:VGNC:33008]	PLEKHA7	-2.50556	2.73556	2.51065e-05	0.00063942		ENSBTAG00000045862	525159	fermitin family member 3 [Source:NCBI gene (formerly Entrezgene);Acc:525159]	FERMT3	-4.45302	-4.88098	0.703452	2.6021e-05	0.000663569
ENSBTAG00000017514	524530	cyclin D1 [Source:VGNC Symbol;Acc:VGNC:26962]	CCND1	1.90069	5.0106	2.51369e-05	0.00063942		ENSBTAG00000011319	515193	SAFB like transcription modulator [Source:VGNC Symbol;Acc:VGNC:34970]	SLTM	1.77566	1.77609	7.13401	2.63727e-05	0.000670856
ENSBTAG00000020281	510366	ninein [Source:VGNC Symbol;Acc:VGNC:32077]	NIN	1.84768	3.53949	2.56176e-05	0.000650023		ENSBTAG00000004238	507012	transforming acidic coiled-coil containing protein 1 [Source:VGNC Symbol;Acc:VGNC:35557]	TACC1	2.05642	2.05964	4.65554	2.65591e-05	0.000673911
ENSBTAG00000015076	535935	large tumor suppressor kinase 1 [Source:VGNC Symbol;Acc:VGNC:30800]	LATS1	2.28735	3.36004	2.62313e-05	0.000663696		ENSBTAG00000030567	539043	outer dense fiber of sperm tails 2 [Source:VGNC Symbol;Acc:VGNC:32401]	ODF2	1.6719	1.67606	3.76812	2.67439e-05	0.000675487
ENSBTAG00000002985	#N/A	#N/A	#N/A	7.29416	1.01633	2.62869e-05	0.000663696		ENSBTAG00000005147	510165	HPS5 biogenesis of lysosomal organelles complex 2 subunit 2 [Source:VGNC Symbol;Acc:VGNC:29946]	HPS5	1.52151	1.52455	4.05071	2.67539e-05	0.000675487
ENSBTAG00000033160	511583	family with sequence similarity 114 member A1 [Source:VGNC Symbol;Acc:VGNC:53713]	FAM114A1	1.95777	3.53515	2.65599e-05	0.000668929		ENSBTAG00000014752	533105	A-kinase anchoring protein 11 [Source:VGNC Symbol;Acc:VGNC:25781]	AKAP11	2.19416	2.20536	2.96821	2.68256e-05	0.000675621
ENSBTAG00000003733	511869	transmembrane 4 L six family member 5 [Source:VGNC Symbol;Acc:VGNC:35907]	TM4SF5	-1.64594	3.9264	2.68316e-05	0.000673015		ENSBTAG00000017108	514809	OTU deubiquitinase 3 [Source:VGNC Symbol;Acc:VGNC:32494]	OTUD3	2.27418	2.28948	2.67752	2.71431e-05	0.000681929
ENSBTAG00000014044	#N/A	vezatin, adherens junctions transmembrane protein [Source:VGNC Symbol;Acc:VGNC:36789]	VEZT	2.27213	3.84697	2.68544e-05	0.000673015		ENSBTAG00000010009	614715	Bos taurus transmembrane and coiled-coil domains 1 (TMCO1), mRNA. [Source:RefSeq mRNA;Acc:NM_001034766]	TMCO1	1.25802	1.25832	6.96777	2.74236e-05	0.00068728
ENSBTAG00000021963	534203	SLAIN motif family member 2 [Source:VGNC Symbol;Acc:VGNC:34652]	SLAIN2	1.601	4.97565	2.76096e-05	0.00068998		ENSBTAG00000005265	506049	zinc finger CCHC-type containing 9 [Source:VGNC Symbol;Acc:VGNC:97331]	ZCCHC9	1.88114	1.88552	4.01583	2.77196e-05	0.000692991
ENSBTAG00000011635	513551	centromere protein N [Source:VGNC Symbol;Acc:VGNC:27182]	CENPN	3.27173	1.95454	2.7667e-05	0.00068998		ENSBTAG00000020966	522085	ALX homeobox 3 [Source:VGNC Symbol;Acc:VGNC:25854]	ALX3	1.97569	1.98472	3.19541	2.79388e-05	0.000696759
ENSBTAG00000003607	534672	FAM20C golgi associated secretory pathway kinase [Source:VGNC Symbol;Acc:VGNC:28787]	FAM20C	-1.58701	6.83169	2.79362e-05	0.000694989		ENSBTAG00000017196	281803	protein disulfide isomerase family A member 3 [Source:VGNC Symbol;Acc:VGNC:32697]	PDIA3	1.64326	1.64362	7.34842	2.86272e-05	0.000712181
ENSBTAG00000005847	282041	Rho associated coiled-coil containing protein kinase 2 [Source:VGNC Symbol;Acc:VGNC:34082]	ROCK2	1.66161	6.93197	2.80081e-05	0.00069508		ENSBTAG00000015457	281768	fibroblast growth factor receptor 1 [Source:VGNC Symbol;Acc:VGNC:50179]	FGFR1	3.58432	3.66322	1.78955	2.88511e-05	0.000716
ENSBTAG00000006756	505129	matrin 3 [Source:NCBI gene (formerly Entrezgene);Acc:505129]	MATR3	1.1666	7.14083	2.82381e-05	0.000699083		ENSBTAG00000021250	523324	ralA binding protein 1 [Source:VGNC Symbol;Acc:VGNC:33700]	RALBP1	1.60776	1.60858	6.08226	2.90771e-05	0.000719854
ENSBTAG00000011626	327663	ATPase secretory pathway Ca2+ transporting 1 [Source:VGNC Symbol;Acc:VGNC:26296]	ATP2C1	3.26702	2.20788	2.85021e-05	0.000703905		ENSBTAG00000014278	535982	T-box transcription factor 2 [Source:VGNC Symbol;Acc:VGNC:35666]	TBX2	-3.12236	-3.16036	2.09164	2.93833e-05	0.000725668
ENSBTAG00000007236	525337	pericentriolar material 1 [Source:VGNC Symbol;Acc:VGNC:32634]	PCM1	1.42843	6.63696	2.8948e-05	0.000711552		ENSBTAG00000019625	518852	enoyl-CoA hydratase and 3-hydroxyacyl CoA dehydrogenase [Source:VGNC Symbol;Acc:VGNC:53541]	EHHADH	3.06165	3.13753	1.51199	2.97578e-05	0.000733137
ENSBTAG00000014399	537018	glutamine and serine rich 1 [Source:VGNC Symbol;Acc:VGNC:33604]	QSER1	1.31882	5.83167	2.89516e-05	0.000711552		ENSBTAG00000006276	511774	C1q and TNF related 1 [Source:VGNC Symbol;Acc:VGNC:26622]	C1QTNF1	-1.37131	-1.37168	6.90836	2.98488e-05	0.000733602
ENSBTAG00000019534	407144	tRNA nucleotidyl transferase 1 [Source:VGNC Symbol;Acc:VGNC:36377]	TRNT1	2.41292	2.74722	2.91693e-05	0.000714524		ENSBTAG00000018437	508938	structural maintenance of chromosomes 5 [Source:VGNC Symbol;Acc:VGNC:35002]	SMC5	1.77458	1.77538	6.28841	3.07129e-05	0.000753021
ENSBTAG00000015428	790244	transmembrane protein 170A [Source:NCBI gene (formerly Entrezgene);Acc:790244]	TMEM170A	1.57097	4.65638	2.9213e-05	0.000714524		ENSBTAG00000012848	535675	protein tyrosine phosphatase receptor type U [Source:VGNC Symbol;Acc:VGNC:33559]	PTPRU	-4.26283	-4.49124	1.55573	3.08869e-05	0.000755466
ENSBTAG00000018493	504339	glutamate rich 5 [Source:VGNC Symbol;Acc:VGNC:28585]	ERICH5	2.26465	3.6316	3.00829e-05	0.000733951		ENSBTAG00000016779	534624	CAP-Gly domain containing linker protein 1 [Source:VGNC Symbol;Acc:VGNC:27444]	CLIP1	1.24725	1.24759	6.91006	3.13154e-05	0.00076264
ENSBTAG00000020403	#N/A	zinc finger MYM-type containing 2 [Source:VGNC Symbol;Acc:VGNC:56646]	ZMYM2	1.90751	3.14451	3.02453e-05	0.000733951		ENSBTAG00000020454	512397	leucine zipper tumor suppressor family member 3 [Source:VGNC Symbol;Acc:VGNC:31123]	LZTS3	2.2693	2.27731	3.7706	3.13929e-05	0.00076264
ENSBTAG00000054662	523504	F-box and leucine rich repeat protein 17 [Source:NCBI gene (formerly Entrezgene);Acc:523504]	FBXL17	2.42624	3.31848	3.03022e-05	0.000733951		ENSBTAG00000006703	515331	prostaglandin D2 receptor [Source:VGNC Symbol;Acc:VGNC:33499]	PTGDR	1.93864	1.94306	3.85895	3.14644e-05	0.00076264
ENSBTAG00000038151	100125945	elongation factor 1 homolog [Source:VGNC Symbol;Acc:VGNC:28446]	ELOF1	-1.43999	5.58858	3.03444e-05	0.000733951		ENSBTAG00000019854	514991	ATP binding cassette subfamily E member 1 [Source:VGNC Symbol;Acc:VGNC:25479]	ABCE1	1.64035	1.64305	4.26332	3.148e-05	0.00076264
ENSBTAG00000016199	538540	clathrin interactor 1 [Source:VGNC Symbol;Acc:VGNC:27443]	CLINT1	1.7011	6.2308	3.04321e-05	0.000733951		ENSBTAG00000015428	790244	transmembrane protein 170A [Source:NCBI gene (formerly Entrezgene);Acc:790244]	TMEM170A	1.52981	1.53168	4.65638	3.18356e-05	0.000769424
ENSBTAG00000000169	281184	ankyrin repeat, SAM and basic leucine zipper domain containing 1 [Source:VGNC Symbol;Acc:VGNC:26231]	ASZ1	3.63836	1.90436	3.04947e-05	0.000733951		ENSBTAG00000021196	616791	chromosome 5 C12orf45 homolog [Source:VGNC Symbol;Acc:VGNC:49162]	C5H12orf45	1.72727	1.72966	4.52749	3.19357e-05	0.000770014
ENSBTAG00000013462	516017	L1 cell adhesion molecule [Source:VGNC Symbol;Acc:VGNC:30760]	L1CAM	-2.26841	4.53579	3.05122e-05	0.000733951		ENSBTAG00000003861	512655	G-patch domain containing 11 [Source:VGNC Symbol;Acc:VGNC:29515]	GPATCH11	1.27533	1.27584	6.21868	3.24254e-05	0.000779974
ENSBTAG00000001725	615107	C-X-C motif chemokine ligand 10 [Source:VGNC Symbol;Acc:VGNC:27846]	CXCL10	4.1802	2.49153	3.06062e-05	0.000734478		ENSBTAG00000043570	#N/A	0	0	1.83353	1.83354	15.7276	3.27314e-05	0.000785477
ENSBTAG00000019964	504526	growth arrest specific 6 [Source:VGNC Symbol;Acc:VGNC:29261]	GAS6	-1.27818	7.28099	3.0717e-05	0.000734728		ENSBTAG00000003081	509865	RWD domain containing 4 [Source:VGNC Symbol;Acc:VGNC:34229]	RWDD4	1.39611	1.39655	6.47086	3.3039e-05	0.000790992
ENSBTAG00000032455	#N/A	#N/A	#N/A	3.50537	4.06787	3.07611e-05	0.000734728		ENSBTAG00000039709	615510	PARP1 binding protein [Source:VGNC Symbol;Acc:VGNC:32588]	PARPBP	2.38962	2.40569	2.86995	3.36524e-05	0.000803787
ENSBTAG00000053044	540152	CDC42 effector protein 4 [Source:NCBI gene (formerly Entrezgene);Acc:540152]	CDC42EP4	-1.36325	5.32222	3.16072e-05	0.000753169		ENSBTAG00000035907	510093	DEAD-box helicase 3 X-linked [Source:VGNC Symbol;Acc:VGNC:56526]	DDX3X	1.61294	1.61472	4.83251	3.43371e-05	0.00081822
ENSBTAG00000003220	528076	atypical chemokine receptor 1 [Source:VGNC Symbol;Acc:VGNC:58436]	ACKR1	-5.23081	1.08567	3.24348e-05	0.000769366		ENSBTAG00000046373	#N/A	#N/A	#N/A	3.1602	3.16587	5.11716	3.51783e-05	0.000836307
ENSBTAG00000010238	613482	leukotriene B4 receptor [Source:VGNC Symbol;Acc:VGNC:31069]	LTB4R	-1.83574	4.68868	3.25333e-05	0.000769366		ENSBTAG00000018373	533746	dihydropyrimidinase like 2 [Source:VGNC Symbol;Acc:VGNC:28195]	DPYSL2	1.54611	1.54683	6.561	3.52875e-05	0.000836946
ENSBTAG00000015010	518370	TBC1 domain family member 23 [Source:VGNC Symbol;Acc:VGNC:35638]	TBC1D23	2.62197	1.79407	3.25724e-05	0.000769366		ENSBTAG00000021845	516375	striatin 3 [Source:VGNC Symbol;Acc:VGNC:35425]	STRN3	1.22205	1.22226	7.40328	3.54021e-05	0.000837713
ENSBTAG00000009131	534095	tetratricopeptide repeat domain 37 [Source:VGNC Symbol;Acc:VGNC:36473]	TTC37	2.2487	3.11054	3.25894e-05	0.000769366		ENSBTAG00000021393	539905	fibronectin leucine rich transmembrane protein 2 [Source:VGNC Symbol;Acc:VGNC:29039]	FLRT2	2.09267	2.10194	3.22682	3.56123e-05	0.00084073
ENSBTAG00000016724	507384	aminopeptidase like 1 [Source:VGNC Symbol;Acc:VGNC:32197]	NPEPL1	-1.47688	4.25188	3.32632e-05	0.000783457		ENSBTAG00000013535	507981	DNA fragmentation factor subunit alpha [Source:NCBI gene (formerly Entrezgene);Acc:507981]	DFFA	-1.23589	-1.23654	5.72234	3.57723e-05	0.000842553
ENSBTAG00000008399	100125287	ATR interacting protein [Source:VGNC Symbol;Acc:VGNC:50170]	ATRIP	1.49839	4.50484	3.3427e-05	0.000785495		ENSBTAG00000020378	785291	discs large MAGUK scaffold protein 1 [Source:VGNC Symbol;Acc:VGNC:53531]	DLG1	2.32841	2.3321	4.88866	3.58553e-05	0.000842559
ENSBTAG00000021164	529366	sarcolemma associated protein [Source:VGNC Symbol;Acc:VGNC:34969]	SLMAP	1.58088	4.40823	3.39232e-05	0.00079532		ENSBTAG00000021474	513939	gasdermin D [Source:VGNC Symbol;Acc:VGNC:29675]	GSDMD	-2.26634	-2.27778	3.02964	3.59948e-05	0.000843888
ENSBTAG00000005163	528735	S100 calcium binding protein A1 [Source:VGNC Symbol;Acc:VGNC:34236]	S100A1	-2.81619	2.83794	3.5305e-05	0.000825812		ENSBTAG00000016915	503620	fms related receptor tyrosine kinase 1 [Source:VGNC Symbol;Acc:VGNC:29041]	FLT1	2.84513	2.87294	2.37819	3.65864e-05	0.000855438
ENSBTAG00000013454	540203	TGF-beta activated kinase 1 (MAP3K7) binding protein 2 [Source:VGNC Symbol;Acc:VGNC:53809]	TAB2	3.73372	1.64441	3.54076e-05	0.000826312		ENSBTAG00000038316	534759	G-patch domain containing 8 [Source:VGNC Symbol;Acc:VGNC:29520]	GPATCH8	2.76475	2.76628	6.48731	3.66556e-05	0.000855438
ENSBTAG00000008963	786852	citron rho-interacting serine/threonine kinase [Source:VGNC Symbol;Acc:VGNC:27375]	CIT	2.49714	2.10325	3.58668e-05	0.000835114		ENSBTAG00000004154	527910	SKI like proto-oncogene [Source:VGNC Symbol;Acc:VGNC:34648]	SKIL	1.32683	1.3278	5.28554	3.69883e-05	0.000861226
ENSBTAG00000010452	616366	podocalyxin like [Source:VGNC Symbol;Acc:VGNC:53665]	PODXL	2.65956	1.66628	3.60003e-05	0.000836308		ENSBTAG00000003675	788252	adhesion G protein-coupled receptor L1 [Source:VGNC Symbol;Acc:VGNC:25671]	ADGRL1	-1.72099	-1.72811	3.30176	3.70918e-05	0.000861277
ENSBTAG00000002336	506525	REST corepressor 1 [Source:VGNC Symbol;Acc:VGNC:33834]	RCOR1	2.57519	2.23539	3.63097e-05	0.000841175		ENSBTAG00000024822	534284	senataxin [Source:VGNC Symbol;Acc:VGNC:34501]	SETX	1.72444	1.72826	4.08523	3.71598e-05	0.000861277
ENSBTAG00000011767	528109	membrane palmitoylated protein 5 [Source:VGNC Symbol;Acc:VGNC:31584]	MPP5	1.2684	5.66543	3.63751e-05	0.000841175		ENSBTAG00000047206	#N/A	#N/A	#N/A	3.8815	3.99261	1.60583	3.73332e-05	0.000863329
ENSBTAG00000053402	#N/A	#N/A	#N/A	2.75673	1.74501	3.64754e-05	0.000841581		ENSBTAG00000031567	522045	SWI/SNF related, matrix associated, actin dependent regulator of chromatin subfamily c member 1 [Source:VGNC Symbol;Acc:VGNC:58414]	SMARCC1	1.61515	1.61532	8.27942	3.74856e-05	0.000864888
ENSBTAG00000003876	536656	mitochondrial calcium uniporter [Source:VGNC Symbol;Acc:VGNC:31325]	MCU	1.86579	4.20738	3.6788e-05	0.000846798		ENSBTAG00000021237	535297	dystonin [Source:NCBI gene (formerly Entrezgene);Acc:535297]	0	1.66647	1.67033	4.0078	3.7676e-05	0.000867315
ENSBTAG00000005102	520774	putative homeodomain transcription factor 2 [Source:VGNC Symbol;Acc:VGNC:32849]	PHTF2	2.51835	1.98658	3.6868e-05	0.000846798		ENSBTAG00000007430	513045	MYB binding protein 1a [Source:VGNC Symbol;Acc:VGNC:31777]	MYBBP1A	1.63132	1.63168	7.04507	3.79171e-05	0.000869391
ENSBTAG00000038316	534759	G-patch domain containing 8 [Source:VGNC Symbol;Acc:VGNC:29520]	GPATCH8	2.75909	6.48731	3.79748e-05	0.000870257		ENSBTAG00000021577	536671	zinc finger FYVE-type containing 16 [Source:VGNC Symbol;Acc:VGNC:37174]	ZFYVE16	2.20113	2.21262	2.94898	3.79371e-05	0.000869391
ENSBTAG00000009153	788534	MLX interacting protein like [Source:VGNC Symbol;Acc:VGNC:31510]	MLXIPL	-3.30535	2.97861	3.81432e-05	0.00087215		ENSBTAG00000011743	504975	tolloid like 2 [Source:VGNC Symbol;Acc:VGNC:35896]	TLL2	-4.89593	-5.32859	1.18788	3.89181e-05	0.00088987
ENSBTAG00000011661	536117	centrosomal protein 152 [Source:VGNC Symbol;Acc:VGNC:27194]	CEP152	2.95554	3.68652	3.82809e-05	0.000873337		ENSBTAG00000033160	511583	family with sequence similarity 114 member A1 [Source:VGNC Symbol;Acc:VGNC:53713]	FAM114A1	1.96295	1.97073	3.53515	3.93179e-05	0.000896995
ENSBTAG00000006703	515331	prostaglandin D2 receptor [Source:VGNC Symbol;Acc:VGNC:33499]	PTGDR	1.98869	3.85895	3.89839e-05	0.000887386		ENSBTAG00000005326	282684	casein kinase 1 alpha 1 [Source:VGNC Symbol;Acc:VGNC:55205]	CSNK1A1	1.19819	1.19852	6.65759	3.97388e-05	0.000904568
ENSBTAG00000022689	616217	RING1 and YY1 binding protein [Source:NCBI gene (formerly Entrezgene);Acc:616217]	RYBP	1.71583	5.19144	3.91964e-05	0.000890232		ENSBTAG00000006671	514567	DEAD-box helicase 27 [Source:VGNC Symbol;Acc:VGNC:56183]	DDX27	1.16338	1.16351	7.96488	3.99748e-05	0.000905859
ENSBTAG00000010009	614715	Bos taurus transmembrane and coiled-coil domains 1 (TMCO1), mRNA. [Source:RefSeq mRNA;Acc:NM_001034766]	TMCO1	1.23597	6.96777	3.93357e-05	0.000891405		ENSBTAG00000044040	100139074	PDGFA associated protein 1 [Source:VGNC Symbol;Acc:VGNC:32655]	PDAP1	2.70099	2.70185	7.12971	4.00242e-05	0.000905859
ENSBTAG00000023867	783330	ring finger and CCCH-type domains 2 [Source:VGNC Symbol;Acc:VGNC:33819]	RC3H2	3.20588	1.61448	3.96443e-05	0.000896402		ENSBTAG00000049437	539788	chromobox 3 [Source:NCBI gene (formerly Entrezgene);Acc:539788]	CBX3	1.11252	1.11262	8.28856	4.00626e-05	0.000905859
ENSBTAG00000019755	512704	receptor accessory protein 3 [Source:VGNC Symbol;Acc:VGNC:33853]	REEP3	1.28728	5.09111	4.05307e-05	0.000914411		ENSBTAG00000003460	505722	transcription elongation factor A1 [Source:VGNC Symbol;Acc:VGNC:35679]	TCEA1	1.62706	1.62784	6.11729	4.0296e-05	0.000909117
ENSBTAG00000021845	516375	striatin 3 [Source:VGNC Symbol;Acc:VGNC:35425]	STRN3	1.21538	7.40328	4.06659e-05	0.000915432		ENSBTAG00000000603	538846	junctional adhesion molecule 2 [Source:VGNC Symbol;Acc:VGNC:50011]	JAM2	1.63828	1.64079	4.03936	4.05649e-05	0.000912851
ENSBTAG00000016779	534624	CAP-Gly domain containing linker protein 1 [Source:VGNC Symbol;Acc:VGNC:27444]	CLIP1	1.22697	6.91006	4.09963e-05	0.000920715		ENSBTAG00000020316	282183	adaptor related protein complex 2 subunit beta 1 [Source:VGNC Symbol;Acc:VGNC:55033]	AP2B1	1.31457	1.31469	8.61806	4.06409e-05	0.000912851
ENSBTAG00000044029	512666	apoptosis and caspase activation inhibitor [Source:VGNC Symbol;Acc:VGNC:26353]	AVEN	1.98064	3.74436	4.11412e-05	0.000920715		ENSBTAG00000011661	536117	centrosomal protein 152 [Source:VGNC Symbol;Acc:VGNC:27194]	CEP152	2.87033	2.88166	3.68652	4.11982e-05	0.00092333
ENSBTAG00000003771	#N/A	#N/A	#N/A	3.52497	3.24319	4.1172e-05	0.000920715		ENSBTAG00000007703	282049	N-myristoyltransferase 2 [Source:VGNC Symbol;Acc:VGNC:32138]	NMT2	1.5871	1.58776	6.28081	4.13558e-05	0.000924825
ENSBTAG00000049437	539788	chromobox 3 [Source:NCBI gene (formerly Entrezgene);Acc:539788]	CBX3	1.11102	8.28856	4.15858e-05	0.000927929		ENSBTAG00000046335	#N/A	0	0	4.03112	4.16965	1.42605	4.17709e-05	0.000932059
ENSBTAG00000011981	338034	MYB proto-oncogene like 1 [Source:VGNC Symbol;Acc:VGNC:31778]	MYBL1	2.26743	3.56991	4.24484e-05	0.000945104		ENSBTAG00000012615	#N/A	zinc finger E-box binding homeobox 2 [Source:VGNC Symbol;Acc:VGNC:56157]	ZEB2	4.06598	4.33135	1.03417	4.27855e-05	0.000952608
ENSBTAG00000017096	513044	glutamate rich 1 [Source:VGNC Symbol;Acc:VGNC:28582]	ERICH1	1.38602	5.56516	4.29559e-05	0.000952368		ENSBTAG00000014515	514842	replication factor C subunit 1 [Source:NCBI gene (formerly Entrezgene);Acc:514842]	RFC1	2.05237	2.05367	5.99707	4.38035e-05	0.000971975
ENSBTAG00000037605	100848815	SLA class II histocompatibility antigen, DQ haplotype D alpha chain-like [Source:NCBI gene (formerly Entrezgene);Acc:100848815]	0	-5.14776	1.03849	4.29619e-05	0.000952368		ENSBTAG00000004190	504657	Rho GTPase activating protein 29 [Source:VGNC Symbol;Acc:VGNC:26087]	ARHGAP29	1.08906	1.08928	7.18937	4.38464e-05	0.000971975
ENSBTAG00000006671	514567	DEAD-box helicase 27 [Source:VGNC Symbol;Acc:VGNC:56183]	DDX27	1.1614	7.96488	4.33319e-05	0.000958482		ENSBTAG00000015638	509038	interleukin 20 receptor subunit alpha [Source:VGNC Symbol;Acc:VGNC:30139]	IL20RA	-3.98863	-4.14317	1.66832	4.45932e-05	0.000985964
ENSBTAG00000051782	522920	ATPase family AAA domain containing 2 [Source:NCBI gene (formerly Entrezgene);Acc:522920]	ATAD2	1.92862	6.38629	4.41334e-05	0.000974095		ENSBTAG00000046239	100849063	ligand dependent nuclear receptor corepressor [Source:NCBI gene (formerly Entrezgene);Acc:100849063]	LCOR	2.4385	2.4594	2.35183	4.46712e-05	0.000985964
ENSBTAG00000021526	#N/A	#N/A	#N/A	2.96431	2.83477	4.42971e-05	0.00097559		ENSBTAG00000004720	535166	sulfatase 1 [Source:VGNC Symbol;Acc:VGNC:53880]	SULF1	3.26505	3.33282	2.39201	4.53591e-05	0.00099898
ENSBTAG00000009272	505848	mitotic deacetylase associated SANT domain protein [Source:VGNC Symbol;Acc:VGNC:28444]	MIDEAS	1.91546	3.72422	4.43978e-05	0.000975697		ENSBTAG00000037605	100848815	SLA class II histocompatibility antigen, DQ haplotype D alpha chain-like [Source:NCBI gene (formerly Entrezgene);Acc:100848815]	0	-6.64026	-1.44269e+08	1.03849	4.55729e-05	0.00100152
ENSBTAG00000009579	517520	centrosomal protein 85 [Source:VGNC Symbol;Acc:VGNC:27216]	CEP85	3.0934	1.82372	4.48617e-05	0.000983767		ENSBTAG00000009230	541273	fibulin 7 [Source:VGNC Symbol;Acc:VGNC:28884]	FBLN7	-4.14709	-4.30263	1.95806	4.61911e-05	0.00100848
ENSBTAG00000004423	508009	Rho GTPase activating protein 42 [Source:VGNC Symbol;Acc:VGNC:26096]	ARHGAP42	2.61131	1.7435	4.50692e-05	0.000984197		ENSBTAG00000000949	510898	DnaJ heat shock protein family (Hsp40) member C9 [Source:VGNC Symbol;Acc:VGNC:55985]	DNAJC9	1.65964	1.66439	3.5633	4.62313e-05	0.00100848
ENSBTAG00000004564	781653	muscleblind like splicing regulator 1 [Source:VGNC Symbol;Acc:VGNC:31283]	MBNL1	1.7529	3.57425	4.50748e-05	0.000984197		ENSBTAG00000024787	789559	HAUS augmin like complex subunit 3 [Source:VGNC Symbol;Acc:VGNC:29759]	HAUS3	2.87064	2.90374	2.17084	4.6265e-05	0.00100848
ENSBTAG00000000585	505805	lymphocyte antigen 6 family member G6C [Source:VGNC Symbol;Acc:VGNC:31090]	LY6G6C	-2.41154	6.67093	4.61348e-05	0.00100519		ENSBTAG00000006526	282152	BCL2 like 1 [Source:VGNC Symbol;Acc:VGNC:26446]	BCL2L1	-1.42764	-1.42887	5.14865	4.62862e-05	0.00100848
ENSBTAG00000013191	525795	agrin [Source:VGNC Symbol;Acc:VGNC:25742]	AGRN	-1.28951	7.07005	4.66439e-05	0.001011		ENSBTAG00000009854	531149	M-phase phosphoprotein 10 [Source:VGNC Symbol;Acc:VGNC:31573]	MPHOSPH10	1.39824	1.39935	5.19964	4.6767e-05	0.00101488
ENSBTAG00000017196	281803	protein disulfide isomerase family A member 3 [Source:VGNC Symbol;Acc:VGNC:32697]	PDIA3	1.57709	7.34842	4.67036e-05	0.001011		ENSBTAG00000012069	507353	coiled-coil domain containing 167 [Source:NCBI gene (formerly Entrezgene);Acc:507353]	CCDC167	-1.40791	-1.40826	7.05093	4.67793e-05	0.00101488
ENSBTAG00000010694	537799	BicC family RNA binding protein 1 [Source:VGNC Symbol;Acc:VGNC:26490]	BICC1	3.16191	3.40437	4.67806e-05	0.001011		ENSBTAG00000018133	537777	semaphorin 3A [Source:VGNC Symbol;Acc:VGNC:34426]	SEMA3A	2.43615	2.45186	3.03699	4.69005e-05	0.00101535
ENSBTAG00000014377	532673	chromodomain helicase DNA binding protein 3 [Source:VGNC Symbol;Acc:VGNC:27279]	CHD3	1.62205	5.97184	4.68009e-05	0.001011		ENSBTAG00000014377	532673	chromodomain helicase DNA binding protein 3 [Source:VGNC Symbol;Acc:VGNC:27279]	CHD3	1.62548	1.62643	5.97184	4.71325e-05	0.0010182
ENSBTAG00000015457	281768	fibroblast growth factor receptor 1 [Source:VGNC Symbol;Acc:VGNC:50179]	FGFR1	3.44825	1.78955	4.70204e-05	0.001011		ENSBTAG00000015076	535935	large tumor suppressor kinase 1 [Source:VGNC Symbol;Acc:VGNC:30800]	LATS1	2.11484	2.12278	3.36004	4.75366e-05	0.00102476
ENSBTAG00000004154	527910	SKI like proto-oncogene [Source:VGNC Symbol;Acc:VGNC:34648]	SKIL	1.32634	5.28554	4.70663e-05	0.001011		ENSBTAG00000050060	523303	natural killer cell cytotoxicity receptor 3 ligand 1 [Source:NCBI gene (formerly Entrezgene);Acc:523303]	NCR3LG1	-3.35003	-3.36618	3.58141	4.85578e-05	0.00104456
ENSBTAG00000016656	540789	poly(ADP-ribose) polymerase family member 14 [Source:NCBI gene (formerly Entrezgene);Acc:540789]	PARP14	1.58515	4.76319	4.70974e-05	0.001011		ENSBTAG00000019314	524531	ubiquitin specific peptidase 25 [Source:VGNC Symbol;Acc:VGNC:36718]	USP25	2.41382	2.43306	2.40377	4.87685e-05	0.00104688
ENSBTAG00000026966	615588	Ras association domain family member 9 [Source:VGNC Symbol;Acc:VGNC:33765]	RASSF9	1.86468	3.1191	4.72159e-05	0.00101141		ENSBTAG00000025219	100848263	schlafen family member 12 [Source:NCBI gene (formerly Entrezgene);Acc:100848263]	0	4.18713	4.45373	0.799892	4.90446e-05	0.00105059
ENSBTAG00000011684	518839	RAB11 family interacting protein 1 [Source:VGNC Symbol;Acc:VGNC:33616]	RAB11FIP1	3.07211	3.08107	4.73275e-05	0.00101168		ENSBTAG00000051318	#N/A	0	0	1.56353	1.56454	5.66606	4.91874e-05	0.00105143
ENSBTAG00000005359	534069	transforming growth factor beta 2 [Source:VGNC Symbol;Acc:VGNC:35802]	TGFB2	1.64813	5.97763	4.74533e-05	0.00101192		ENSBTAG00000012293	540689	sperm associated antigen 9 [Source:VGNC Symbol;Acc:VGNC:35170]	SPAG9	1.24101	1.24175	5.68328	4.94457e-05	0.00105474
ENSBTAG00000024822	534284	senataxin [Source:VGNC Symbol;Acc:VGNC:34501]	SETX	1.68182	4.08523	4.75377e-05	0.00101192		ENSBTAG00000003259	540964	transcription elongation regulator 1 [Source:VGNC Symbol;Acc:VGNC:35685]	TCERG1	1.18534	1.1855	7.78303	5.04211e-05	0.0010733
ENSBTAG00000009854	531149	M-phase phosphoprotein 10 [Source:VGNC Symbol;Acc:VGNC:31573]	MPHOSPH10	1.41895	5.19964	4.7818e-05	0.00101576		ENSBTAG00000024199	789336	lysine methyltransferase 2C [Source:VGNC Symbol;Acc:VGNC:30692]	KMT2C	1.74738	1.75416	3.34062	5.11857e-05	0.0010873
ENSBTAG00000018381	528033	cytokine receptor like factor 3 [Source:VGNC Symbol;Acc:VGNC:27718]	CRLF3	1.99891	4.00715	4.79632e-05	0.00101672		ENSBTAG00000005550	100138040	SOS Ras/Rho guanine nucleotide exchange factor 2 [Source:VGNC Symbol;Acc:VGNC:54490]	SOS2	2.59622	2.62819	2.15877	5.1442e-05	0.00109046
ENSBTAG00000013302	533850	R3H domain containing 1 [Source:VGNC Symbol;Acc:VGNC:57358]	R3HDM1	1.94861	4.50524	4.87285e-05	0.0010308		ENSBTAG00000020538	514373	HECT and RLD domain containing E3 ubiquitin protein ligase 5 [Source:VGNC Symbol;Acc:VGNC:29814]	HERC5	1.5697	1.57134	4.81869	5.17901e-05	0.00109556
ENSBTAG00000030671	785042	hook microtubule tethering protein 1 [Source:VGNC Symbol;Acc:VGNC:29905]	HOOK1	-3.64185	2.35242	4.88711e-05	0.00103167		ENSBTAG00000016104	523664	B-TFIID TATA-box binding protein associated factor 1 [Source:VGNC Symbol;Acc:VGNC:55937]	BTAF1	2.87108	2.91166	1.86086	5.21998e-05	0.00110194
ENSBTAG00000001764	523701	neurocan [Source:VGNC Symbol;Acc:VGNC:31900]	NCAN	-2.34165	3.43189	4.89927e-05	0.00103209		ENSBTAG00000005708	514679	kinesin family member 20B [Source:NCBI gene (formerly Entrezgene);Acc:514679]	KIF20B	1.30068	1.30125	6.22983	5.38087e-05	0.00113355
ENSBTAG00000002298	507498	cytoskeleton associated protein 2 like [Source:VGNC Symbol;Acc:VGNC:27381]	CKAP2L	1.18181	6.85802	4.95741e-05	0.00104205		ENSBTAG00000004240	510267	thymopoietin [Source:VGNC Symbol;Acc:VGNC:36138]	TMPO	1.64649	1.65176	3.46583	5.45172e-05	0.0011461
ENSBTAG00000012168	526705	RAN binding protein 6 [Source:VGNC Symbol;Acc:VGNC:50254]	RANBP6	3.13322	1.36867	4.96701e-05	0.00104205		ENSBTAG00000001333	#N/A	#N/A	#N/A	2.55407	2.56832	3.15274	5.4796e-05	0.00114959
ENSBTAG00000019853	540826	SMAD specific E3 ubiquitin protein ligase 2 [Source:VGNC Symbol;Acc:VGNC:35041]	SMURF2	2.31075	2.43942	5.06056e-05	0.00105949		ENSBTAG00000007130	533375	ESF1 nucleolar pre-rRNA processing protein homolog [Source:VGNC Symbol;Acc:VGNC:28601]	ESF1	1.17441	1.17472	6.73302	5.53859e-05	0.00115758
ENSBTAG00000051318	#N/A	0	0	1.56916	5.66606	5.10674e-05	0.00106696		ENSBTAG00000039340	538100	sodium voltage-gated channel beta subunit 4 [Source:VGNC Symbol;Acc:VGNC:34351]	SCN4B	-3.44328	-3.53506	1.95373	5.55096e-05	0.00115758
ENSBTAG00000015188	505884	Kruppel like factor 6 [Source:VGNC Symbol;Acc:VGNC:56191]	KLF6	1.57874	7.36622	5.15492e-05	0.00107298		ENSBTAG00000002627	508905	zinc finger RANBP2-type containing 2 [Source:VGNC Symbol;Acc:VGNC:37372]	ZRANB2	1.24395	1.24418	7.34213	5.55181e-05	0.00115758
ENSBTAG00000044040	100139074	PDGFA associated protein 1 [Source:VGNC Symbol;Acc:VGNC:32655]	PDAP1	2.64827	7.12971	5.15662e-05	0.00107298		ENSBTAG00000047147	516526	crystallin beta-gamma domain containing 3 [Source:NCBI gene (formerly Entrezgene);Acc:516526]	CRYBG3	3.01474	3.07382	1.67046	5.75165e-05	0.00119679
ENSBTAG00000005236	281665	cholecystokinin B receptor [Source:VGNC Symbol;Acc:VGNC:26942]	CCKBR	-1.52437	3.91389	5.3255e-05	0.00110586		ENSBTAG00000000494	539556	phosphodiesterase 4D [Source:VGNC Symbol;Acc:VGNC:32677]	PDE4D	2.91356	2.97922	1.67	5.91201e-05	0.00122765
ENSBTAG00000007196	513463	transgelin [Source:VGNC Symbol;Acc:VGNC:35585]	TAGLN	2.81565	4.80622	5.37394e-05	0.00111352		ENSBTAG00000004564	781653	muscleblind like splicing regulator 1 [Source:VGNC Symbol;Acc:VGNC:31283]	MBNL1	1.72988	1.73555	3.57425	5.93846e-05	0.0012282
ENSBTAG00000046553	100848979	SECIS binding protein 2 like [Source:VGNC Symbol;Acc:VGNC:58410]	SECISBP2L	1.80218	4.83158	5.3843e-05	0.00111352		ENSBTAG00000003604	507654	ADAMTS like 4 [Source:VGNC Symbol;Acc:VGNC:25632]	ADAMTSL4	-1.37443	-1.37538	5.46962	5.94843e-05	0.0012282
ENSBTAG00000024000	616225	atonal bHLH transcription factor 8 [Source:VGNC Symbol;Acc:VGNC:26272]	ATOH8	-2.8445	2.21617	5.4072e-05	0.00111464		ENSBTAG00000051836	526041	ankyrin repeat domain protein [Source:NCBI gene (formerly Entrezgene);Acc:526041]	0	3.84022	4.10298	0.722499	5.9509e-05	0.0012282
ENSBTAG00000012878	514945	BMS1 ribosome biogenesis factor [Source:VGNC Symbol;Acc:VGNC:26527]	BMS1	1.17497	6.98801	5.41786e-05	0.00111464		ENSBTAG00000004575	540584	family with sequence similarity 126 member A [Source:VGNC Symbol;Acc:VGNC:28724]	FAM126A	1.97624	1.98141	3.82651	6.10655e-05	0.00125566
ENSBTAG00000019262	787696	DNA topoisomerase II alpha [Source:VGNC Symbol;Acc:VGNC:49583]	TOP2A	1.58089	8.7539	5.42259e-05	0.00111464		ENSBTAG00000019853	540826	SMAD specific E3 ubiquitin protein ligase 2 [Source:VGNC Symbol;Acc:VGNC:35041]	SMURF2	2.17715	2.19314	2.43942	6.10864e-05	0.00125566
ENSBTAG00000002291	538902	zinc finger and BTB domain containing 41 [Source:VGNC Symbol;Acc:VGNC:37080]	ZBTB41	3.04234	1.73728	5.44518e-05	0.00111703		ENSBTAG00000050848	787099	zinc finger CCHC-type containing 2 [Source:NCBI gene (formerly Entrezgene);Acc:787099]	ZCCHC2	3.18719	3.27632	1.22692	6.16104e-05	0.00125997
ENSBTAG00000033735	783379	WASH complex subunit 4 [Source:VGNC Symbol;Acc:VGNC:36868]	WASHC4	1.41365	4.77428	5.51338e-05	0.00112552		ENSBTAG00000013213	508692	odd-skipped related transciption factor 2 [Source:VGNC Symbol;Acc:VGNC:32477]	OSR2	1.44327	1.44419	5.32747	6.16633e-05	0.00125997
ENSBTAG00000002614	539779	RUN and FYVE domain containing 2 [Source:VGNC Symbol;Acc:VGNC:34214]	RUFY2	2.26198	2.07433	5.51783e-05	0.00112552		ENSBTAG00000018493	504339	glutamate rich 5 [Source:VGNC Symbol;Acc:VGNC:28585]	ERICH5	2.0375	2.04331	3.6316	6.16672e-05	0.00125997
ENSBTAG00000016525	535951	integrin subunit alpha 1 [Source:VGNC Symbol;Acc:VGNC:30310]	ITGA1	1.6391	4.55056	5.52031e-05	0.00112552		ENSBTAG00000006579	414348	prolyl 4-hydroxylase subunit alpha 3 [Source:VGNC Symbol;Acc:VGNC:32537]	P4HA3	-2.96536	-2.98589	3.17826	6.25884e-05	0.00127623
ENSBTAG00000019712	767617	ST14 transmembrane serine protease matriptase [Source:NCBI gene (formerly Entrezgene);Acc:767617]	ST14	-2.7683	2.95326	5.53079e-05	0.00112552		ENSBTAG00000030222	513297	L3MBTL histone methyl-lysine binding protein 2 [Source:VGNC Symbol;Acc:VGNC:30763]	L3MBTL2	1.90476	1.91194	3.32349	6.32142e-05	0.00128641
ENSBTAG00000012586	511913	heat shock protein family D (Hsp60) member 1 [Source:VGNC Symbol;Acc:VGNC:49070]	HSPD1	2.68725	6.54132	5.54448e-05	0.00112605		ENSBTAG00000011524	540834	5'-3' exoribonuclease 1 [Source:VGNC Symbol;Acc:VGNC:37008]	XRN1	1.59605	1.59854	4.46612	6.36851e-05	0.0012934
ENSBTAG00000016305	521728	ATPase 13A4 [Source:VGNC Symbol;Acc:VGNC:26280]	ATP13A4	-4.75998	0.7649	5.56571e-05	0.00112811		ENSBTAG00000009279	533901	tankyrase 2 [Source:VGNC Symbol;Acc:VGNC:36186]	TNKS2	2.86294	2.90679	1.79819	6.44879e-05	0.0013071
ENSBTAG00000004426	538849	DnaJ heat shock protein family (Hsp40) member B14 [Source:VGNC Symbol;Acc:VGNC:53699]	DNAJB14	1.49387	4.06304	5.59525e-05	0.00113184		ENSBTAG00000011865	515389	metastasis associated 1 family member 2 [Source:VGNC Symbol;Acc:VGNC:31714]	MTA2	-1.40246	-1.40411	4.84259	6.46455e-05	0.00130769
ENSBTAG00000027024	788978	Rho GTPase activating protein 5 [Source:VGNC Symbol;Acc:VGNC:26098]	ARHGAP5	1.62382	6.06121	5.71957e-05	0.00115469		ENSBTAG00000011266	534401	zinc finger and BTB domain containing 16 [Source:VGNC Symbol;Acc:VGNC:37062]	ZBTB16	-7.00389	-1.44269e+08	1.47854	6.49642e-05	0.00131153
ENSBTAG00000016006	532856	ankyrin repeat domain 11 [Source:VGNC Symbol;Acc:VGNC:25910]	ANKRD11	1.83704	6.49607	5.75248e-05	0.00115904		ENSBTAG00000021301	768237	acyl-CoA synthetase family member 2 [Source:VGNC Symbol;Acc:VGNC:25562]	ACSF2	-1.30514	-1.30596	5.54925	6.60859e-05	0.00133153
ENSBTAG00000021058	100140430	DEAD-box helicase 42 [Source:VGNC Symbol;Acc:VGNC:27968]	DDX42	3.09485	2.38796	5.78025e-05	0.00116233		ENSBTAG00000011500	528555	calsequestrin 2 [Source:VGNC Symbol;Acc:VGNC:26787]	CASQ2	-7.07732	-1.44269e+08	1.69728	6.62552e-05	0.00133231
ENSBTAG00000032446	#N/A	0	0	3.37713	1.48059	5.807e-05	0.00116276		ENSBTAG00000019271	616033	asparaginyl-tRNA synthetase 1 [Source:NCBI gene (formerly Entrezgene);Acc:616033]	NARS1	1.06016	1.06026	8.26278	6.76406e-05	0.00135748
ENSBTAG00000005929	#N/A	spectrin beta, non-erythrocytic 2 [Source:HGNC Symbol;Acc:HGNC:11276]	SPTBN2	1.91854	2.91122	5.8212e-05	0.00116276		ENSBTAG00000024000	616225	atonal bHLH transcription factor 8 [Source:VGNC Symbol;Acc:VGNC:26272]	ATOH8	-3.10134	-3.15165	2.21617	6.7794e-05	0.00135788
ENSBTAG00000046142	505370	protein kinase cAMP-dependent type I regulatory subunit beta [Source:VGNC Symbol;Acc:VGNC:58609]	PRKAR1B	-1.89227	4.21976	5.82326e-05	0.00116276		ENSBTAG00000003074	529171	solute carrier family 16 member 6 [Source:VGNC Symbol;Acc:VGNC:34692]	SLC16A6	3.51526	3.62413	1.15935	6.81563e-05	0.00136246
ENSBTAG00000020878	539676	cyclin D binding myb like transcription factor 1 [Source:VGNC Symbol;Acc:VGNC:28116]	DMTF1	2.34747	2.08734	5.82809e-05	0.00116276		ENSBTAG00000009383	508467	kinesin family member 11 [Source:VGNC Symbol;Acc:VGNC:30580]	KIF11	1.26037	1.26167	4.89554	6.86284e-05	0.0013692
ENSBTAG00000016851	404181	ribosomal protein S6 kinase B1 [Source:VGNC Symbol;Acc:VGNC:34146]	RPS6KB1	1.24055	6.09632	5.90564e-05	0.00117593		ENSBTAG00000038116	#N/A	0	0	2.40264	2.42532	2.13476	6.94531e-05	0.00138295
ENSBTAG00000001864	528877	nuclear receptor subfamily 4 group A member 3 [Source:VGNC Symbol;Acc:VGNC:32247]	NR4A3	3.54853	2.17498	6.03758e-05	0.00119926		ENSBTAG00000001644	535163	midasin AAA ATPase 1 [Source:VGNC Symbol;Acc:VGNC:31338]	MDN1	1.70784	1.70979	4.74111	6.99366e-05	0.00138985
ENSBTAG00000021538	523485	myosin IE [Source:VGNC Symbol;Acc:VGNC:31820]	MYO1E	2.09492	2.60022	6.04787e-05	0.00119926		ENSBTAG00000011155	540170	pumilio RNA binding family member 2 [Source:VGNC Symbol;Acc:VGNC:33570]	PUM2	2.54633	2.57619	1.97574	7.05357e-05	0.0013947
ENSBTAG00000009383	508467	kinesin family member 11 [Source:VGNC Symbol;Acc:VGNC:30580]	KIF11	1.27985	4.89554	6.06451e-05	0.00119926		ENSBTAG00000009154	#N/A	U2 snRNP associated SURP domain containing [Source:VGNC Symbol;Acc:VGNC:36557]	U2SURP	2.08919	2.09228	4.6202	7.06607e-05	0.0013947
ENSBTAG00000009983	515748	kinesin family member 23 [Source:VGNC Symbol;Acc:VGNC:55119]	KIF23	1.33825	5.94999	6.06996e-05	0.00119926		ENSBTAG00000015188	505884	Kruppel like factor 6 [Source:VGNC Symbol;Acc:VGNC:56191]	KLF6	1.53176	1.53205	7.36622	7.07231e-05	0.0013947
ENSBTAG00000006507	534082	ADAM metallopeptidase with thrombospondin type 1 motif 3 [Source:VGNC Symbol;Acc:VGNC:25626]	ADAMTS3	4.15218	1.75566	6.09921e-05	0.0012027		ENSBTAG00000020505	540582	strawberry notch homolog 1 [Source:VGNC Symbol;Acc:VGNC:34308]	SBNO1	1.45713	1.4577	6.26434	7.07286e-05	0.0013947
ENSBTAG00000012293	540689	sperm associated antigen 9 [Source:VGNC Symbol;Acc:VGNC:35170]	SPAG9	1.2302	5.68328	6.14803e-05	0.00120999		ENSBTAG00000008399	100125287	ATR interacting protein [Source:VGNC Symbol;Acc:VGNC:50170]	ATRIP	1.41161	1.41364	4.50484	7.11408e-05	0.00140011
ENSBTAG00000006579	414348	prolyl 4-hydroxylase subunit alpha 3 [Source:VGNC Symbol;Acc:VGNC:32537]	P4HA3	-2.8047	3.17826	6.16757e-05	0.00121149		ENSBTAG00000001864	528877	nuclear receptor subfamily 4 group A member 3 [Source:VGNC Symbol;Acc:VGNC:32247]	NR4A3	2.75256	2.77638	2.17498	7.13277e-05	0.00140108
ENSBTAG00000019314	524531	ubiquitin specific peptidase 25 [Source:VGNC Symbol;Acc:VGNC:36718]	USP25	2.48519	2.40377	6.20938e-05	0.00121735		ENSBTAG00000021024	506730	microtubule actin crosslinking factor 1 [Source:VGNC Symbol;Acc:VGNC:55610]	MACF1	1.53382	1.53473	5.87829	7.16769e-05	0.00140274
ENSBTAG00000003960	538197	centriolar coiled-coil protein 110 [Source:VGNC Symbol;Acc:VGNC:26981]	CCP110	1.69274	4.23498	6.25805e-05	0.00122453		ENSBTAG00000015238	281129	desmocollin 3 [Source:VGNC Symbol;Acc:VGNC:28214]	DSC3	1.54115	1.54489	3.50632	7.16882e-05	0.00140274
ENSBTAG00000015566	534265	CTR9 homolog, Paf1/RNA polymerase II complex component [Source:VGNC Symbol;Acc:VGNC:27810]	CTR9	1.23862	6.87124	6.33181e-05	0.00123659		ENSBTAG00000006933	510825	protein phosphatase 1 regulatory subunit 10 [Source:VGNC Symbol;Acc:VGNC:33221]	PPP1R10	2.27076	2.28702	2.6238	7.18758e-05	0.00140372
ENSBTAG00000001801	539867	synaptotagmin 4 [Source:VGNC Symbol;Acc:VGNC:35543]	SYT4	-1.37441	5.30055	6.41099e-05	0.00124965		ENSBTAG00000004368	541127	nuclear factor of activated T cells 3 [Source:VGNC Symbol;Acc:VGNC:32033]	NFATC3	1.85549	1.86039	3.87747	7.20907e-05	0.00140522
ENSBTAG00000017877	507718	nectin cell adhesion molecule 4 [Source:VGNC Symbol;Acc:VGNC:55633]	NECTIN4	-1.93884	5.89013	6.45745e-05	0.0012563		ENSBTAG00000020093	617935	cullin 4A [Source:VGNC Symbol;Acc:VGNC:27832]	CUL4A	1.8279	1.83374	3.33947	7.2386e-05	0.00140827
ENSBTAG00000049308	782903	growth arrest specific 2 like 3 [Source:NCBI gene (formerly Entrezgene);Acc:782903]	GAS2L3	3.02845	1.73295	6.48132e-05	0.00125854		ENSBTAG00000013884	508234	signal-induced proliferation-associated 1 [Source:VGNC Symbol;Acc:VGNC:34627]	SIPA1	-1.60839	-1.61413	3.31459	7.3e-05	0.00141751
ENSBTAG00000014900	527305	CCR4-NOT transcription complex subunit 3 [Source:VGNC Symbol;Acc:VGNC:27518]	CNOT3	-1.96508	3.71204	6.50549e-05	0.00126083		ENSBTAG00000012878	514945	BMS1 ribosome biogenesis factor [Source:VGNC Symbol;Acc:VGNC:26527]	BMS1	1.14987	1.15013	6.98801	7.36298e-05	0.00142702
ENSBTAG00000047268	782183	WT1 transcription factor [Source:VGNC Symbol;Acc:VGNC:59373]	WT1	2.82936	1.48505	6.59149e-05	0.00127506		ENSBTAG00000001764	523701	neurocan [Source:VGNC Symbol;Acc:VGNC:31900]	NCAN	-2.09425	-2.10079	3.43189	7.43941e-05	0.00143909
ENSBTAG00000016367	508615	RNA binding motif protein 18 [Source:VGNC Symbol;Acc:VGNC:33789]	RBM18	1.32517	5.31731	6.6815e-05	0.00129002		ENSBTAG00000011146	614242	RAB8B, member RAS oncogene family [Source:VGNC Symbol;Acc:VGNC:33663]	RAB8B	1.39751	1.40042	4.06654	7.46868e-05	0.00144163
ENSBTAG00000003604	507654	ADAMTS like 4 [Source:VGNC Symbol;Acc:VGNC:25632]	ADAMTSL4	-1.37192	5.46962	6.7044e-05	0.00129199		ENSBTAG00000011885	280878	nicotinamide nucleotide transhydrogenase [Source:VGNC Symbol;Acc:VGNC:32143]	NNT	1.45323	1.45826	3.39152	7.48087e-05	0.00144163
ENSBTAG00000005326	282684	casein kinase 1 alpha 1 [Source:VGNC Symbol;Acc:VGNC:55205]	CSNK1A1	1.1701	6.65759	6.74761e-05	0.00129786		ENSBTAG00000000585	505805	lymphocyte antigen 6 family member G6C [Source:VGNC Symbol;Acc:VGNC:31090]	LY6G6C	-2.25636	-2.25712	6.67093	7.55099e-05	0.0014504
ENSBTAG00000019054	614555	epithelial stromal interaction 1 [Source:VGNC Symbol;Acc:VGNC:28557]	EPSTI1	2.118	4.34712	6.79545e-05	0.00130438		ENSBTAG00000001241	614040	ISL LIM homeobox 1 [Source:VGNC Symbol;Acc:VGNC:30296]	ISL1	2.52497	2.53775	3.01018	7.55493e-05	0.0014504
ENSBTAG00000021196	616791	chromosome 5 C12orf45 homolog [Source:VGNC Symbol;Acc:VGNC:49162]	C5H12orf45	1.66034	4.52749	6.82222e-05	0.00130438		ENSBTAG00000040116	511901	H1.10 linker histone [Source:VGNC Symbol;Acc:VGNC:83614]	H1-10	3.38303	3.41559	2.77184	7.60271e-05	0.00145683
ENSBTAG00000014407	527199	INO80 complex subunit D [Source:VGNC Symbol;Acc:VGNC:30206]	INO80D	2.901	0.943268	6.83241e-05	0.00130438		ENSBTAG00000003960	538197	centriolar coiled-coil protein 110 [Source:VGNC Symbol;Acc:VGNC:26981]	CCP110	1.60387	1.60644	4.23498	7.6416e-05	0.00146153
ENSBTAG00000005724	515978	synaptotagmin like 4 [Source:VGNC Symbol;Acc:VGNC:35548]	SYTL4	2.9507	1.87376	6.83276e-05	0.00130438		ENSBTAG00000033690	530961	BRCA1 associated RING domain 1 [Source:VGNC Symbol;Acc:VGNC:26420]	BARD1	1.69563	1.70287	3.11996	7.66502e-05	0.00146268
ENSBTAG00000004575	540584	family with sequence similarity 126 member A [Source:VGNC Symbol;Acc:VGNC:28724]	FAM126A	1.98894	3.82651	6.84696e-05	0.00130464		ENSBTAG00000017335	100139648	HGF activator [Source:VGNC Symbol;Acc:VGNC:53764]	HGFAC	-1.35872	-1.36137	3.90614	7.67638e-05	0.00146268
ENSBTAG00000018094	539836	zinc finger protein 689 [Source:NCBI gene (formerly Entrezgene);Acc:539836]	ZNF689	2.74671	1.34103	6.89777e-05	0.00131084		ENSBTAG00000001178	788351	ubiquitin specific peptidase like 1 [Source:VGNC Symbol;Acc:VGNC:36740]	USPL1	2.09781	2.11596	2.05129	7.70001e-05	0.00146403
ENSBTAG00000048655	281363	5'-nucleotidase ecto [Source:NCBI gene (formerly Entrezgene);Acc:281363]	NT5E	-4.03842	1.32865	6.90526e-05	0.00131084		ENSBTAG00000012094	539670	secretory carrier membrane protein 3 [Source:VGNC Symbol;Acc:VGNC:34317]	SCAMP3	-1.12521	-1.12536	7.61376	7.71223e-05	0.00146403
ENSBTAG00000003378	506187	ArfGAP with coiled-coil, ankyrin repeat and PH domains 2 [Source:VGNC Symbol;Acc:VGNC:25527]	ACAP2	2.64152	1.74849	6.95888e-05	0.00131856		ENSBTAG00000009187	784171	DnaJ heat shock protein family (Hsp40) member C28 [Source:VGNC Symbol;Acc:VGNC:53536]	DNAJC28	2.3689	2.39496	2.01735	7.75579e-05	0.00146926
ENSBTAG00000003460	505722	transcription elongation factor A1 [Source:VGNC Symbol;Acc:VGNC:35679]	TCEA1	1.56474	6.11729	7.00086e-05	0.00132405		ENSBTAG00000012409	281960	periostin [Source:VGNC Symbol;Acc:VGNC:33171]	POSTN	1.55934	1.55966	7.35698	7.77703e-05	0.00146926
ENSBTAG00000001241	614040	ISL LIM homeobox 1 [Source:VGNC Symbol;Acc:VGNC:30296]	ISL1	2.71668	3.01018	7.14552e-05	0.0013489		ENSBTAG00000011876	513807	MORC family CW-type zinc finger 3 [Source:VGNC Symbol;Acc:VGNC:31556]	MORC3	1.55595	1.55778	4.78096	7.78313e-05	0.00146926
ENSBTAG00000010303	281839	intercellular adhesion molecule 1 [Source:VGNC Symbol;Acc:VGNC:50197]	ICAM1	-1.94411	2.97404	7.28626e-05	0.00137292		ENSBTAG00000010637	513067	arylsulfatase G [Source:VGNC Symbol;Acc:VGNC:55034]	ARSG	-2.44842	-2.47656	2.08109	7.8896e-05	0.00148565
ENSBTAG00000024888	281972	phosphodiesterase 5A [Source:VGNC Symbol;Acc:VGNC:32678]	PDE5A	2.54882	2.46697	7.33163e-05	0.00137892		ENSBTAG00000054662	523504	F-box and leucine rich repeat protein 17 [Source:NCBI gene (formerly Entrezgene);Acc:523504]	FBXL17	2.36443	2.37784	3.31848	7.89915e-05	0.00148565
ENSBTAG00000055295	#N/A	0	0	-2.28769	2.15668	7.4117e-05	0.0013914		ENSBTAG00000047661	#N/A	#N/A	#N/A	2.8513	2.88644	2.18854	7.98368e-05	0.00149878
ENSBTAG00000002613	507661	MIS18 binding protein 1 [Source:VGNC Symbol;Acc:VGNC:59350]	MIS18BP1	1.5561	5.58653	7.55555e-05	0.0014158		ENSBTAG00000053402	#N/A	#N/A	#N/A	2.41359	2.44676	1.74501	8.02762e-05	0.00150425
ENSBTAG00000019203	282343	S100 calcium binding protein A4 [Source:VGNC Symbol;Acc:VGNC:34244]	S100A4	-1.61345	10.5966	7.64764e-05	0.00142792		ENSBTAG00000002985	#N/A	#N/A	#N/A	6.57095	1.44269e+08	1.01633	8.07228e-05	0.00150822
ENSBTAG00000002628	617624	solute carrier family 44 member 2 [Source:VGNC Symbol;Acc:VGNC:34876]	SLC44A2	-1.15112	7.3736	7.65335e-05	0.00142792		ENSBTAG00000033662	101907541	NCK associated protein 1 [Source:VGNC Symbol;Acc:VGNC:31915]	NCKAP1	2.18669	2.19972	2.7762	8.08776e-05	0.00150822
ENSBTAG00000005603	516104	C-X-C motif chemokine ligand 11 [Source:VGNC Symbol;Acc:VGNC:27847]	CXCL11	2.68091	4.01499	7.66237e-05	0.00142792		ENSBTAG00000002291	538902	zinc finger and BTB domain containing 41 [Source:VGNC Symbol;Acc:VGNC:37080]	ZBTB41	2.90312	2.9558	1.73728	8.09325e-05	0.00150822
ENSBTAG00000016169	497011	inhibitor of DNA binding 1, HLH protein [Source:VGNC Symbol;Acc:VGNC:30031]	ID1	-2.28369	6.84493	7.67971e-05	0.00142854		ENSBTAG00000014044	#N/A	vezatin, adherens junctions transmembrane protein [Source:VGNC Symbol;Acc:VGNC:36789]	VEZT	2.06062	2.06656	3.84697	8.17185e-05	0.00152008
ENSBTAG00000021052	513071	G protein subunit beta 1 like [Source:VGNC Symbol;Acc:VGNC:29458]	GNB1L	-1.62911	4.18843	7.73238e-05	0.00143112		ENSBTAG00000001660	539967	SPT2 chromatin protein domain containing 1 [Source:VGNC Symbol;Acc:VGNC:35261]	SPTY2D1	1.79541	1.79921	3.89853	8.20251e-05	0.001523
ENSBTAG00000015498	532015	ELOVL fatty acid elongase 4 [Source:VGNC Symbol;Acc:VGNC:28450]	ELOVL4	2.53999	3.42587	7.73349e-05	0.00143112		ENSBTAG00000038151	100125945	elongation factor 1 homolog [Source:VGNC Symbol;Acc:VGNC:28446]	ELOF1	-1.33597	-1.33681	5.58858	8.449e-05	0.00156468
ENSBTAG00000009187	784171	DnaJ heat shock protein family (Hsp40) member C28 [Source:VGNC Symbol;Acc:VGNC:53536]	DNAJC28	2.45995	2.01735	7.73579e-05	0.00143112		ENSBTAG00000046140	100125919	neural proliferation, differentiation and control 1 [Source:VGNC Symbol;Acc:VGNC:55066]	NPDC1	-1.32937	-1.33065	5.03106	8.46999e-05	0.00156468
ENSBTAG00000032884	#N/A	#N/A	#N/A	-4.32131	0.812124	7.9181e-05	0.00146219		ENSBTAG00000006844	#N/A	#N/A	#N/A	6.6507	1.44269e+08	0.642842	8.47313e-05	0.00156468
ENSBTAG00000010727	615657	autophagy related 4D cysteine peptidase [Source:VGNC Symbol;Acc:VGNC:26260]	ATG4D	-1.24406	6.12516	7.94387e-05	0.00146429		ENSBTAG00000006587	540823	zinc finger protein 367 [Source:VGNC Symbol;Acc:VGNC:37260]	ZNF367	2.55118	2.57075	2.83329	8.56044e-05	0.00157794
ENSBTAG00000009407	511415	mbt domain containing 1 [Source:VGNC Symbol;Acc:VGNC:31290]	MBTD1	4.19793	0.787995	7.98678e-05	0.00146954		ENSBTAG00000005163	528735	S100 calcium binding protein A1 [Source:VGNC Symbol;Acc:VGNC:34236]	S100A1	-2.61136	-2.6302	2.83794	8.59489e-05	0.00158143
ENSBTAG00000023054	282524	solute carrier family 25 member 16 [Source:VGNC Symbol;Acc:VGNC:55993]	SLC25A16	1.50929	3.85736	8.04588e-05	0.00147774		ENSBTAG00000020886	510385	UTP25 small subunit processor component [Source:VGNC Symbol;Acc:VGNC:54509]	UTP25	1.27914	1.28052	4.84761	8.72563e-05	0.00160259
ENSBTAG00000009035	281681	centromere protein E [Source:VGNC Symbol;Acc:VGNC:27175]	CENPE	1.2801	7.65003	8.08941e-05	0.00148306		ENSBTAG00000049089	#N/A	0	0	2.32966	2.34267	2.96497	8.91823e-05	0.00163252
ENSBTAG00000012615	#N/A	zinc finger E-box binding homeobox 2 [Source:VGNC Symbol;Acc:VGNC:56157]	ZEB2	3.21927	1.03417	8.13863e-05	0.0014894		ENSBTAG00000052369	#N/A	0	0	1.19538	1.19559	7.31246	8.92069e-05	0.00163252
ENSBTAG00000020852	618274	solute carrier family 16 member 11 [Source:VGNC Symbol;Acc:VGNC:34685]	SLC16A11	-1.49539	3.67759	8.16913e-05	0.00148989		ENSBTAG00000007074	511794	zinc finger with KRAB and SCAN domains 8 [Source:NCBI gene (formerly Entrezgene);Acc:511794]	ZKSCAN8	2.45409	2.47507	2.34399	8.981e-05	0.0016406
ENSBTAG00000013425	101907531	COP9 signalosome subunit 2 [Source:VGNC Symbol;Acc:VGNC:27599]	COPS2	1.69491	3.25846	8.17803e-05	0.00148989		ENSBTAG00000022575	617772	transmembrane protein adipocyte associated 1 [Source:VGNC Symbol;Acc:VGNC:54506]	TPRA1	-1.55075	-1.55259	4.71444	9.03265e-05	0.00164648
ENSBTAG00000017919	540891	CCR4-NOT transcription complex subunit 4 [Source:VGNC Symbol;Acc:VGNC:27519]	CNOT4	2.13709	2.28839	8.18526e-05	0.00148989		ENSBTAG00000044029	512666	apoptosis and caspase activation inhibitor [Source:VGNC Symbol;Acc:VGNC:26353]	AVEN	1.82781	1.83293	3.74436	9.04553e-05	0.00164648
ENSBTAG00000026971	613318	cell division cycle associated 5 [Source:VGNC Symbol;Acc:VGNC:56261]	CDCA5	2.8833	2.59156	8.25215e-05	0.00149939		ENSBTAG00000014261	510075	threonyl-tRNA synthetase 1 [Source:VGNC Symbol;Acc:VGNC:35605]	TARS1	1.04051	1.04064	7.88155	9.1376e-05	0.0016594
ENSBTAG00000014373	532953	centrin 3 [Source:VGNC Symbol;Acc:VGNC:27235]	CETN3	1.31951	8.15353	8.34113e-05	0.00151285		ENSBTAG00000012963	781105	villin like [Source:VGNC Symbol;Acc:VGNC:36795]	VILL	-3.37988	-3.47125	1.46283	9.14912e-05	0.0016594
ENSBTAG00000009617	282356	solute carrier family 2 member 1 [Source:VGNC Symbol;Acc:VGNC:34796]	SLC2A1	-1.46517	4.59044	8.35815e-05	0.00151324		ENSBTAG00000037935	533232	SWI/SNF related, matrix associated, actin dependent regulator of chromatin, subfamily d, member 1 [Source:VGNC Symbol;Acc:VGNC:34993]	SMARCD1	2.8115	2.82971	2.93509	9.2706e-05	0.00167612
ENSBTAG00000011401	519573	PDZ domain containing 8 [Source:VGNC Symbol;Acc:VGNC:32728]	PDZD8	1.329	4.65512	8.91124e-05	0.00161051		ENSBTAG00000014127	282023	prostaglandin-endoperoxide synthase 2 [Source:VGNC Symbol;Acc:VGNC:33512]	PTGS2	1.83766	1.83775	9.09311	9.27426e-05	0.00167612
ENSBTAG00000015337	#N/A	#N/A	#N/A	4.79289	1.05662	8.95516e-05	0.00161558		ENSBTAG00000016979	100125779	phosphate cytidylyltransferase 1, choline, alpha [Source:VGNC Symbol;Acc:VGNC:32652]	PCYT1A	2.14315	2.16478	2.04739	9.3394e-05	0.0016849
ENSBTAG00000009482	541306	AF4/FMR2 family member 4 [Source:VGNC Symbol;Acc:VGNC:25712]	AFF4	1.52338	3.61372	8.99739e-05	0.00162033		ENSBTAG00000021963	534203	SLAIN motif family member 2 [Source:VGNC Symbol;Acc:VGNC:34652]	SLAIN2	1.44697	1.44844	4.97565	9.37166e-05	0.00168622
ENSBTAG00000010341	540114	PWWP domain containing 2A [Source:VGNC Symbol;Acc:VGNC:55301]	PWWP2A	2.07052	3.17623	9.03279e-05	0.00162383		ENSBTAG00000008612	511581	complement C1r [Source:VGNC Symbol;Acc:VGNC:56194]	C1R	-2.07256	-2.08903	2.45057	9.37988e-05	0.00168622
ENSBTAG00000030616	515542	zinc finger CCHC-type containing 10 [Source:VGNC Symbol;Acc:VGNC:37115]	ZCCHC10	1.71733	4.81807	9.052e-05	0.00162441		ENSBTAG00000009153	788534	MLX interacting protein like [Source:VGNC Symbol;Acc:VGNC:31510]	MLXIPL	-3.6541	-3.7065	2.97861	9.42638e-05	0.00169159
ENSBTAG00000033304	617047	transcriptional and immune response regulator [Source:VGNC Symbol;Acc:VGNC:49157]	TCIM	1.52256	6.11428	9.2842e-05	0.00166315		ENSBTAG00000051340	#N/A	0	0	4.87353	5.37419	0.590607	9.50545e-05	0.00170278
ENSBTAG00000005574	280750	clusterin [Source:NCBI gene (formerly Entrezgene);Acc:280750]	CLU	-1.34611	7.79595	9.39169e-05	0.00167945		ENSBTAG00000023054	282524	solute carrier family 25 member 16 [Source:VGNC Symbol;Acc:VGNC:55993]	SLC25A16	1.47075	1.47406	3.85736	9.54693e-05	0.00170721
ENSBTAG00000003861	512655	G-patch domain containing 11 [Source:VGNC Symbol;Acc:VGNC:29515]	GPATCH11	1.20294	6.21868	9.44458e-05	0.00168318		ENSBTAG00000001801	539867	synaptotagmin 4 [Source:VGNC Symbol;Acc:VGNC:35543]	SYT4	-1.31637	-1.31731	5.30055	9.5754e-05	0.00170868
ENSBTAG00000015537	540692	RAS protein activator like 2 [Source:VGNC Symbol;Acc:VGNC:33738]	RASAL2	2.06348	2.53919	9.45134e-05	0.00168318		ENSBTAG00000017426	533406	programmed cell death 6 interacting protein [Source:VGNC Symbol;Acc:VGNC:32664]	PDCD6IP	2.75666	2.77766	2.72439	9.58873e-05	0.00170868
ENSBTAG00000021980	515639	Ras association domain family member 8 [Source:VGNC Symbol;Acc:VGNC:33764]	RASSF8	1.26023	5.11928	9.46223e-05	0.00168318		ENSBTAG00000003455	516065	ankyrin repeat domain 6 [Source:VGNC Symbol;Acc:VGNC:53781]	ANKRD6	-1.85947	-1.86912	3.22505	9.60672e-05	0.00170889
ENSBTAG00000016838	512631	SRSF protein kinase 1 [Source:VGNC Symbol;Acc:VGNC:54238]	SRPK1	1.79942	4.89473	9.51297e-05	0.00168926		ENSBTAG00000018016	614673	nuclear protein 1, transcriptional regulator [Source:VGNC Symbol;Acc:VGNC:32369]	NUPR1	-2.63549	-2.64954	3.46896	9.6533e-05	0.00171342
ENSBTAG00000006587	540823	zinc finger protein 367 [Source:VGNC Symbol;Acc:VGNC:37260]	ZNF367	2.42523	2.83329	9.5304e-05	0.0016894		ENSBTAG00000019704	539633	helicase like transcription factor [Source:VGNC Symbol;Acc:VGNC:50276]	HLTF	1.73306	1.7345	5.35048	9.66587e-05	0.00171342
ENSBTAG00000019634	100137737	p53-induced death domain protein 1 [Source:VGNC Symbol;Acc:VGNC:32863]	PIDD1	-1.73715	3.47462	9.58583e-05	0.00169628		ENSBTAG00000017597	535035	establishment of sister chromatid cohesion N-acetyltransferase 1 [Source:VGNC Symbol;Acc:VGNC:28599]	ESCO1	2.16132	2.18046	2.31159	9.75192e-05	0.00172567
ENSBTAG00000020378	785291	discs large MAGUK scaffold protein 1 [Source:VGNC Symbol;Acc:VGNC:53531]	DLG1	2.0911	4.88866	9.62533e-05	0.00170031		ENSBTAG00000000682	789597	Rap guanine nucleotide exchange factor 6 [Source:NCBI gene (formerly Entrezgene);Acc:789597]	0	2.33576	2.34989	2.96376	9.85292e-05	0.00173778
ENSBTAG00000018598	534551	heat shock protein family B (small) member 6 [Source:NCBI gene (formerly Entrezgene);Acc:534551]	HSPB6	-1.94549	5.79616	9.70692e-05	0.00171175		ENSBTAG00000006656	533251	RAN binding protein 1 [Source:NCBI gene (formerly Entrezgene);Acc:533251]	RANBP1	1.04383	1.04395	7.90258	9.85452e-05	0.00173778
ENSBTAG00000018383	513059	ATPase family AAA domain containing 5 [Source:VGNC Symbol;Acc:VGNC:26235]	ATAD5	1.43668	5.0457	9.7678e-05	0.0017174		ENSBTAG00000001749	539639	SUMO specific peptidase 2 [Source:VGNC Symbol;Acc:VGNC:34446]	SENP2	1.70398	1.70934	3.4579	9.90516e-05	0.00174369
ENSBTAG00000046671	100298456	wolframin ER transmembrane glycoprotein [Source:VGNC Symbol;Acc:VGNC:36936]	WFS1	-1.59504	4.60409	9.78575e-05	0.0017174		ENSBTAG00000009047	787498	yippee like 3 [Source:VGNC Symbol;Acc:VGNC:37036]	YPEL3	-1.54987	-1.55333	3.84476	9.95094e-05	0.00174872
ENSBTAG00000008612	511581	complement C1r [Source:VGNC Symbol;Acc:VGNC:56194]	C1R	-2.03979	2.45057	9.78963e-05	0.0017174		ENSBTAG00000016006	532856	ankyrin repeat domain 11 [Source:VGNC Symbol;Acc:VGNC:25910]	ANKRD11	1.74192	1.74264	6.49607	0.000100465	0.00176246
ENSBTAG00000017482	509394	inositol-3-phosphate synthase 1 [Source:VGNC Symbol;Acc:VGNC:30306]	ISYNA1	-1.32834	4.96514	9.87355e-05	0.00172915		ENSBTAG00000015362	540595	bone morphogenetic protein 7 [Source:VGNC Symbol;Acc:VGNC:26522]	BMP7	-1.41015	-1.41071	6.21194	0.000101439	0.0017765
ENSBTAG00000015942	528615	DnaJ heat shock protein family (Hsp40) member A4 [Source:VGNC Symbol;Acc:VGNC:53935]	DNAJA4	-1.22384	4.8341	9.93421e-05	0.00173678		ENSBTAG00000011043	#N/A	#N/A	#N/A	-3.661	-3.77639	1.38687	0.000101861	0.00178081
ENSBTAG00000031567	522045	SWI/SNF related, matrix associated, actin dependent regulator of chromatin subfamily c member 1 [Source:VGNC Symbol;Acc:VGNC:58414]	SMARCC1	1.49	8.27942	0.0001021	0.00178194		ENSBTAG00000010238	613482	leukotriene B4 receptor [Source:VGNC Symbol;Acc:VGNC:31069]	LTB4R	-1.55477	-1.55633	4.68868	0.000102925	0.00179634
ENSBTAG00000015053	539332	cofilin 2 [Source:VGNC Symbol;Acc:VGNC:27254]	CFL2	1.16829	7.1307	0.00010274	0.001789		ENSBTAG00000011982	#N/A	#N/A	#N/A	2.01054	2.02278	2.33402	0.000103353	0.00179922
ENSBTAG00000010277	#N/A	#N/A	#N/A	4.5193	1.11353	0.000102856	0.001789		ENSBTAG00000003239	510487	UTP20 small subunit processome component [Source:VGNC Symbol;Acc:VGNC:36744]	UTP20	1.6856	1.68637	6.01981	0.000103444	0.00179922
ENSBTAG00000022150	#N/A	matrix remodeling associated 5 [Source:VGNC Symbol;Acc:VGNC:31774]	MXRA5	-4.03135	0.842927	0.000103106	0.00179028		ENSBTAG00000021601	539687	par-6 family cell polarity regulator beta [Source:VGNC Symbol;Acc:VGNC:32584]	PARD6B	2.00764	2.0155	3.40981	0.000104262	0.00181035
ENSBTAG00000025443	523042	folliculin interacting protein 1 [Source:VGNC Symbol;Acc:VGNC:29068]	FNIP1	3.21508	0.99453	0.000104535	0.00181191		ENSBTAG00000022861	#N/A	#N/A	#N/A	2.98896	3.02045	2.0088	0.000104898	0.0018183
ENSBTAG00000003081	509865	RWD domain containing 4 [Source:VGNC Symbol;Acc:VGNC:34229]	RWDD4	1.30689	6.47086	0.000104708	0.00181191		ENSBTAG00000007867	510814	signal transducer and activator of transcription 1 [Source:VGNC Symbol;Acc:VGNC:56151]	STAT1	3.06892	3.12833	1.5307	0.000105137	0.00181934
ENSBTAG00000012409	281960	periostin [Source:VGNC Symbol;Acc:VGNC:33171]	POSTN	1.52244	7.35698	0.000105795	0.00182761		ENSBTAG00000037726	281986	phospholipase C delta 1 [Source:VGNC Symbol;Acc:VGNC:32984]	PLCD1	-1.14571	-1.14649	5.44117	0.000105542	0.00182219
ENSBTAG00000013452	516762	aquaporin 9 [Source:VGNC Symbol;Acc:VGNC:26051]	AQP9	2.25436	5.23147	0.000106921	0.00184394		ENSBTAG00000010375	787839	MSL complex subunit 1 [Source:VGNC Symbol;Acc:VGNC:31698]	MSL1	1.87938	1.88938	2.73855	0.00010566	0.00182219
ENSBTAG00000001886	787049	family with sequence similarity 122B [Source:VGNC Symbol;Acc:VGNC:50154]	FAM122B	2.30644	2.10814	0.000107557	0.00185176		ENSBTAG00000014792	781335	mitogen-activated protein kinase kinase kinase kinase 5 [Source:VGNC Symbol;Acc:VGNC:31208]	MAP4K5	1.80575	1.8118	3.24459	0.000105967	0.00182438
ENSBTAG00000000497	618607	aldo-keto reductase family 1 member A1 [Source:VGNC Symbol;Acc:VGNC:25795]	AKR1A1	-1.07932	7.20753	0.000108999	0.00187341		ENSBTAG00000012371	532189	carboxypeptidase D [Source:VGNC Symbol;Acc:VGNC:27647]	CPD	1.89577	1.90327	3.38504	0.000109158	0.00187615
ENSBTAG00000011266	534401	zinc finger and BTB domain containing 16 [Source:VGNC Symbol;Acc:VGNC:37062]	ZBTB16	-4.08174	1.47854	0.000109586	0.00187842		ENSBTAG00000015106	514360	desmoplakin [Source:VGNC Symbol;Acc:VGNC:28225]	DSP	1.57292	1.5784	3.44533	0.000109858	0.001885
ENSBTAG00000050060	523303	natural killer cell cytotoxicity receptor 3 ligand 1 [Source:NCBI gene (formerly Entrezgene);Acc:523303]	NCR3LG1	-3.15037	3.58141	0.000109775	0.00187842		ENSBTAG00000020878	539676	cyclin D binding myb like transcription factor 1 [Source:VGNC Symbol;Acc:VGNC:28116]	DMTF1	2.24739	2.27292	2.08734	0.00011022	0.00188803
ENSBTAG00000008406	282099	three prime repair exonuclease 1 [Source:VGNC Symbol;Acc:VGNC:36303]	TREX1	-1.24643	4.86021	0.000109844	0.00187842		ENSBTAG00000002336	506525	REST corepressor 1 [Source:VGNC Symbol;Acc:VGNC:33834]	RCOR1	2.25059	2.27166	2.23539	0.000110875	0.00189606
ENSBTAG00000000494	539556	phosphodiesterase 4D [Source:VGNC Symbol;Acc:VGNC:32677]	PDE4D	2.47222	1.67	0.000110908	0.00189343		ENSBTAG00000010506	540599	MYST/Esa1 associated factor 6 [Source:VGNC Symbol;Acc:VGNC:31342]	MEAF6	2.22336	2.24273	2.25554	0.00011218	0.00191516
ENSBTAG00000013045	525619	dyskerin pseudouridine synthase 1 [Source:VGNC Symbol;Acc:VGNC:28078]	DKC1	1.18737	8.11288	0.000111175	0.00189482		ENSBTAG00000032455	#N/A	#N/A	#N/A	3.07555	3.08736	4.06787	0.000113275	0.00193061
ENSBTAG00000010670	520493	V-set and immunoglobulin domain containing 8 [Source:VGNC Symbol;Acc:VGNC:55697]	VSIG8	-2.48255	3.16969	0.000113754	0.00193553		ENSBTAG00000015566	534265	CTR9 homolog, Paf1/RNA polymerase II complex component [Source:VGNC Symbol;Acc:VGNC:27810]	CTR9	1.19038	1.19067	6.87124	0.000113557	0.00193217
ENSBTAG00000007665	281358	natriuretic peptide receptor 3 [Source:NCBI gene (formerly Entrezgene);Acc:281358]	NPR3	1.97406	5.69465	0.000115085	0.00195491		ENSBTAG00000030575	#N/A	#N/A	#N/A	3.28461	3.41734	1.19618	0.000114681	0.00194805
ENSBTAG00000048950	510707	Bos taurus UL16-binding protein 15 (ULBP15), mRNA. [Source:RefSeq mRNA;Acc:NM_001168611]	ULBP13	1.49901	3.41268	0.000115611	0.00196056		ENSBTAG00000011916	538743	ubiquitin specific peptidase 8 [Source:VGNC Symbol;Acc:VGNC:36739]	USP8	1.0241	1.02424	7.77056	0.000114944	0.00194926
ENSBTAG00000018201	512373	triokinase and FMN cyclase [Source:VGNC Symbol;Acc:VGNC:56287]	TKFC	-1.42408	4.0224	0.000116168	0.00196675		ENSBTAG00000012135	515517	La ribonucleoprotein 1B [Source:VGNC Symbol;Acc:VGNC:30791]	LARP1B	1.37642	1.37727	5.63828	0.000117141	0.0019832
ENSBTAG00000013455	510817	speckle type BTB/POZ protein like [Source:VGNC Symbol;Acc:VGNC:35230]	SPOPL	2.97103	1.72651	0.000116889	0.00197566		ENSBTAG00000003541	100137855	zinc finger protein 614 [Source:VGNC Symbol;Acc:VGNC:37313]	ZNF614	1.85494	1.8735	1.97894	0.00011884	0.00200686
ENSBTAG00000000742	538514	angiomotin like 2 [Source:VGNC Symbol;Acc:VGNC:25872]	AMOTL2	1.2915	7.4931	0.00011827	0.00199252		ENSBTAG00000002668	526026	zinc finger protein 711 [Source:VGNC Symbol;Acc:VGNC:37337]	ZNF711	1.15941	1.16058	4.9375	0.000118933	0.00200686
ENSBTAG00000020886	510385	UTP25 small subunit processor component [Source:VGNC Symbol;Acc:VGNC:54509]	UTP25	1.26208	4.84761	0.000118278	0.00199252		ENSBTAG00000011767	528109	membrane palmitoylated protein 5 [Source:VGNC Symbol;Acc:VGNC:31584]	MPP5	1.17576	1.17646	5.66543	0.000119864	0.00201923
ENSBTAG00000048508	281867	inhibin subunit beta A [Source:NCBI gene (formerly Entrezgene);Acc:281867]	INHBA	2.28523	7.81307	0.000119221	0.00200508		ENSBTAG00000012882	510331	cullin 5 [Source:VGNC Symbol;Acc:VGNC:27834]	CUL5	1.61664	1.62184	3.47608	0.000120588	0.00202807
ENSBTAG00000014788	513774	A-kinase anchoring protein 12 [Source:VGNC Symbol;Acc:VGNC:25782]	AKAP12	1.66527	4.68395	0.000119606	0.00200823		ENSBTAG00000000176	540766	Sp3 transcription factor [Source:VGNC Symbol;Acc:VGNC:35154]	SP3	4.03065	4.29563	0.723828	0.000121191	0.00203486
ENSBTAG00000010945	532862	SEC24 homolog B, COPII coat complex component [Source:VGNC Symbol;Acc:VGNC:34414]	SEC24B	3.60131	1.42109	0.000121337	0.00203395		ENSBTAG00000049163	540132	tetraspanin 9 [Source:NCBI gene (formerly Entrezgene);Acc:540132]	TSPAN9	-2.16954	-2.17223	5.11319	0.00012176	0.00204103
ENSBTAG00000005550	100138040	SOS Ras/Rho guanine nucleotide exchange factor 2 [Source:VGNC Symbol;Acc:VGNC:54490]	SOS2	2.29967	2.15877	0.000121748	0.00203748		ENSBTAG00000019916	505010	calmin [Source:VGNC Symbol;Acc:VGNC:27452]	CLMN	-1.92196	-1.93153	3.16177	0.000122406	0.0020485
ENSBTAG00000005708	514679	kinesin family member 20B [Source:NCBI gene (formerly Entrezgene);Acc:514679]	KIF20B	1.23557	6.22983	0.000122081	0.0020397		ENSBTAG00000006708	508410	ariadne RBR E3 ubiquitin protein ligase 1 [Source:VGNC Symbol;Acc:VGNC:26133]	ARIH1	1.09262	1.093	6.36519	0.000122911	0.00205356
ENSBTAG00000019110	507736	proline rich nuclear receptor coactivator 1 [Source:VGNC Symbol;Acc:VGNC:33098]	PNRC1	3.51229	1.84309	0.000122607	0.00204513		ENSBTAG00000019203	282343	S100 calcium binding protein A4 [Source:VGNC Symbol;Acc:VGNC:34244]	S100A4	-1.54597	-1.54601	10.5966	0.000123925	0.0020671
ENSBTAG00000013403	538585	ATP/GTP binding protein like 5 [Source:VGNC Symbol;Acc:VGNC:25723]	AGBL5	-1.24901	4.19008	0.000125616	0.00209188		ENSBTAG00000023907	508076	collagen type XVIII alpha 1 chain [Source:VGNC Symbol;Acc:VGNC:27559]	COL18A1	-2.11444	-2.11978	4.09321	0.000124161	0.00206766
ENSBTAG00000051348	#N/A	0	0	1.54818	4.01218	0.0001261	0.00209652		ENSBTAG00000015053	539332	cofilin 2 [Source:VGNC Symbol;Acc:VGNC:27254]	CFL2	1.1511	1.15134	7.1307	0.000127226	0.00211523
ENSBTAG00000021762	535102	zinc finger CCCH-type containing 15 [Source:VGNC Symbol;Acc:VGNC:37103]	ZC3H15	1.16509	7.44895	0.000126572	0.00210092		ENSBTAG00000015337	#N/A	#N/A	#N/A	3.43596	3.54427	1.05662	0.000127646	0.00211876
ENSBTAG00000039117	540222	TOG array regulator of axonemal microtubules 1 [Source:VGNC Symbol;Acc:VGNC:36214]	TOGARAM1	2.12932	3.46125	0.000127971	0.00212069		ENSBTAG00000018745	282707	centrosomal protein 290 [Source:VGNC Symbol;Acc:VGNC:27201]	CEP290	1.64199	1.64836	3.10859	0.000127889	0.00211933
ENSBTAG00000007703	282049	N-myristoyltransferase 2 [Source:VGNC Symbol;Acc:VGNC:32138]	NMT2	1.46032	6.28081	0.000128557	0.00212694		ENSBTAG00000053398	787969	kinetochore scaffold 1 [Source:NCBI gene (formerly Entrezgene);Acc:787969]	KNL1	2.48815	2.49825	3.48469	0.000129056	0.0021352
ENSBTAG00000022575	617772	transmembrane protein adipocyte associated 1 [Source:VGNC Symbol;Acc:VGNC:54506]	TPRA1	-1.52799	4.71444	0.000129098	0.00212837		ENSBTAG00000016851	404181	ribosomal protein S6 kinase B1 [Source:VGNC Symbol;Acc:VGNC:34146]	RPS6KB1	1.17462	1.17511	6.09632	0.000130188	0.00215043
ENSBTAG00000052708	100336754	ring finger and CCCH-type domains 1 [Source:NCBI gene (formerly Entrezgene);Acc:100336754]	RC3H1	2.29929	2.19318	0.000129498	0.00212837		ENSBTAG00000026915	534671	NIMA related kinase 1 [Source:VGNC Symbol;Acc:VGNC:31991]	NEK1	1.5747	1.5797	3.73268	0.000131916	0.00217544
ENSBTAG00000021962	511003	BCLAF1 and THRAP3 family member 3 [Source:VGNC Symbol;Acc:VGNC:26452]	BCLAF3	1.62382	2.6907	0.000129529	0.00212837		ENSBTAG00000025526	511168	mediator of DNA damage checkpoint 1 [Source:VGNC Symbol;Acc:VGNC:31328]	MDC1	3.59765	3.73319	1.09842	0.000136838	0.00225296
ENSBTAG00000027017	616756	SIX homeobox 3 [Source:VGNC Symbol;Acc:VGNC:34640]	SIX3	1.75868	2.9402	0.000129621	0.00212837		ENSBTAG00000017514	524530	cyclin D1 [Source:VGNC Symbol;Acc:VGNC:26962]	CCND1	1.63431	1.63622	5.0106	0.000138233	0.00227225
ENSBTAG00000012374	789553	mab-21 like 4 [Source:VGNC Symbol;Acc:VGNC:52718]	MAB21L4	-5.09605	0.953252	0.00012969	0.00212837		ENSBTAG00000018661	505575	transmembrane channel like 6 [Source:VGNC Symbol;Acc:VGNC:35922]	TMC6	-1.205	-1.20556	5.94766	0.00013918	0.00228413
ENSBTAG00000017599	327684	nuclear receptor subfamily 2 group F member 1 [Source:VGNC Symbol;Acc:VGNC:32240]	NR2F1	1.09436	8.26362	0.000130258	0.00213205		ENSBTAG00000018082	614254	quinolinate phosphoribosyltransferase [Source:NCBI gene (formerly Entrezgene);Acc:614254]	QPRT	-1.29146	-1.29232	5.61634	0.000140616	0.00230398
ENSBTAG00000014289	613428	zinc finger FYVE-type containing 9 [Source:VGNC Symbol;Acc:VGNC:37179]	ZFYVE9	1.73691	2.81267	0.000130333	0.00213205		ENSBTAG00000053323	100850100	small integral membrane protein 15 [Source:NCBI gene (formerly Entrezgene);Acc:100850100]	0	3.34893	3.38822	2.13431	0.000141815	0.00231989
ENSBTAG00000017540	540918	family with sequence similarity 13 member C [Source:VGNC Symbol;Acc:VGNC:28732]	FAM13C	2.81335	2.74276	0.000130611	0.00213318		ENSBTAG00000009023	522132	transmembrane O-mannosyltransferase targeting cadherins 3 [Source:VGNC Symbol;Acc:VGNC:36147]	TMTC3	1.65061	1.65193	5.31601	0.000143932	0.00234711
ENSBTAG00000017440	509278	methyltransferase like 16 [Source:VGNC Symbol;Acc:VGNC:55844]	METTL16	1.87085	2.8589	0.000135224	0.00220498		ENSBTAG00000006027	534067	ubiquitin specific peptidase 34 [Source:VGNC Symbol;Acc:VGNC:36724]	USP34	1.32164	1.32284	5.19321	0.000143941	0.00234711
ENSBTAG00000010375	787839	MSL complex subunit 1 [Source:VGNC Symbol;Acc:VGNC:31698]	MSL1	1.90818	2.73855	0.000136073	0.00221527		ENSBTAG00000021874	531074	kinesin family member 14 [Source:VGNC Symbol;Acc:VGNC:30583]	KIF14	3.24072	3.34749	1.15773	0.000147627	0.00240337
ENSBTAG00000002627	508905	zinc finger RANBP2-type containing 2 [Source:VGNC Symbol;Acc:VGNC:37372]	ZRANB2	1.18168	7.34213	0.000136383	0.00221677		ENSBTAG00000001483	519843	SLIT-ROBO Rho GTPase activating protein 2 [Source:NCBI gene (formerly Entrezgene);Acc:519843]	SRGAP2	-1.17201	-1.17303	5.39854	0.000149166	0.00242281
ENSBTAG00000010976	534869	KN motif and ankyrin repeat domains 1 [Source:VGNC Symbol;Acc:VGNC:56976]	KANK1	3.45346	1.98029	0.000136973	0.00222281		ENSBTAG00000031069	614112	sorting nexin 24 [Source:VGNC Symbol;Acc:VGNC:35103]	SNX24	-1.33693	-1.34054	3.99568	0.000149297	0.00242281
ENSBTAG00000033662	101907541	NCK associated protein 1 [Source:VGNC Symbol;Acc:VGNC:31915]	NCKAP1	2.11832	2.7762	0.000137791	0.00222901		ENSBTAG00000012828	534252	TBC1 domain family member 15 [Source:VGNC Symbol;Acc:VGNC:35629]	TBC1D15	1.33037	1.33255	4.128	0.00014998	0.00243001
ENSBTAG00000015129	526736	kallikrein related peptidase 10 [Source:VGNC Symbol;Acc:VGNC:30672]	KLK10	-1.3324	5.18856	0.000137793	0.00222901		ENSBTAG00000008771	524920	myelin expression factor 2 [Source:VGNC Symbol;Acc:VGNC:31791]	MYEF2	1.49239	1.49517	4.18868	0.000150437	0.00243354
ENSBTAG00000014041	539249	G3BP stress granule assembly factor 2 [Source:VGNC Symbol;Acc:VGNC:29177]	G3BP2	1.37383	4.33688	0.000138616	0.00223875		ENSBTAG00000010598	519920	eukaryotic translation initiation factor 4E family member 2 [Source:VGNC Symbol;Acc:VGNC:28410]	EIF4E2	-1.21191	-1.21248	6.06086	0.000154263	0.00249148
ENSBTAG00000003532	508893	TLE family member 4, transcriptional corepressor [Source:VGNC Symbol;Acc:VGNC:35892]	TLE4	1.60317	4.33527	0.000142704	0.00230113		ENSBTAG00000011684	518839	RAB11 family interacting protein 1 [Source:VGNC Symbol;Acc:VGNC:33616]	RAB11FIP1	2.54076	2.55355	3.08107	0.000154944	0.0024985
ENSBTAG00000049368	#N/A	0	0	1.90029	2.68741	0.000143796	0.00230753		ENSBTAG00000004316	508527	biorientation of chromosomes in cell division 1 like 1 [Source:VGNC Symbol;Acc:VGNC:26537]	BOD1L1	1.26704	1.26729	7.19553	0.000155468	0.00250298
ENSBTAG00000017278	353160	acyl-CoA binding domain containing 5 [Source:VGNC Symbol;Acc:VGNC:25532]	ACBD5	2.80676	1.95712	0.000143924	0.00230753		ENSBTAG00000001499	533296	tripartite motif containing 33 [Source:VGNC Symbol;Acc:VGNC:36329]	TRIM33	1.95596	1.96348	3.20022	0.000156466	0.00251508
ENSBTAG00000006933	510825	protein phosphatase 1 regulatory subunit 10 [Source:VGNC Symbol;Acc:VGNC:33221]	PPP1R10	2.13626	2.6238	0.000143978	0.00230753		ENSBTAG00000009407	511415	mbt domain containing 1 [Source:VGNC Symbol;Acc:VGNC:31290]	MBTD1	4.5096	5.00595	0.787995	0.000158841	0.00254922
ENSBTAG00000019804	513526	small nuclear ribonucleoprotein U11/U12 subunit 25 [Source:VGNC Symbol;Acc:VGNC:35069]	SNRNP25	-0.985556	7.88128	0.000144072	0.00230753		ENSBTAG00000051348	#N/A	0	0	1.48855	1.49146	4.01218	0.000159206	0.00255105
ENSBTAG00000012848	535675	protein tyrosine phosphatase receptor type U [Source:VGNC Symbol;Acc:VGNC:33559]	PTPRU	-2.70794	1.55573	0.000144235	0.00230753		ENSBTAG00000011635	513551	centromere protein N [Source:VGNC Symbol;Acc:VGNC:27182]	CENPN	2.59782	2.63192	1.95454	0.00016161	0.00258551
ENSBTAG00000008665	541211	DIX domain containing 1 [Source:VGNC Symbol;Acc:VGNC:28077]	DIXDC1	3.05981	0.970001	0.000146549	0.00234087		ENSBTAG00000054406	787634	chromosome 18 C19orf33 homolog [Source:NCBI gene (formerly Entrezgene);Acc:787634]	C18H19orf33	-1.07004	-1.07011	8.83242	0.000162648	0.00259803
ENSBTAG00000003577	532337	G1 to S phase transition 1 [Source:VGNC Symbol;Acc:VGNC:29681]	GSPT1	1.01844	7.76249	0.000147094	0.0023459		ENSBTAG00000030174	513996	acyl-CoA oxidase 1 [Source:VGNC Symbol;Acc:VGNC:25552]	ACOX1	1.86226	1.86724	3.7145	0.000163592	0.00260901
ENSBTAG00000030182	618906	mitogen-activated protein kinase 11 [Source:VGNC Symbol;Acc:VGNC:31214]	MAPK11	-1.65169	4.12688	0.000148046	0.00235738		ENSBTAG00000017851	507554	retinoid X receptor alpha [Source:VGNC Symbol;Acc:VGNC:34230]	RXRA	-1.59755	-1.59937	4.95269	0.000164183	0.00261434
ENSBTAG00000009230	541273	fibulin 7 [Source:VGNC Symbol;Acc:VGNC:28884]	FBLN7	-2.768	1.95806	0.000148513	0.00236113		ENSBTAG00000017390	#N/A	#N/A	#N/A	3.62581	3.73544	1.58202	0.000164465	0.00261473
ENSBTAG00000001246	282144	ATPase Na+/K+ transporting subunit alpha 1 [Source:VGNC Symbol;Acc:VGNC:26282]	ATP1A1	-1.0373	8.80862	0.000149383	0.00237125		ENSBTAG00000023026	281376	serpin family B member 2-like [Source:NCBI gene (formerly Entrezgene);Acc:281376]	0	-3.74069	-3.74872	4.84575	0.000165938	0.00263084
ENSBTAG00000012211	768039	homeobox A5 [Source:VGNC Symbol;Acc:VGNC:29913]	HOXA5	1.43898	4.3171	0.000153056	0.0024244		ENSBTAG00000017278	353160	acyl-CoA binding domain containing 5 [Source:VGNC Symbol;Acc:VGNC:25532]	ACBD5	2.56736	2.59738	1.95712	0.000166218	0.00263084
ENSBTAG00000015238	281129	desmocollin 3 [Source:VGNC Symbol;Acc:VGNC:28214]	DSC3	1.54418	3.50632	0.000153208	0.0024244		ENSBTAG00000050888	768227	DnaJ heat shock protein family (Hsp40) member C24 [Source:VGNC Symbol;Acc:VGNC:54631]	DNAJC24	2.1491	2.1589	3.21773	0.000166253	0.00263084
ENSBTAG00000051082	535297	dystonin [Source:NCBI gene (formerly Entrezgene);Acc:535297]	0	1.68321	3.31271	0.000154296	0.00243782		ENSBTAG00000018004	520311	SH3 domain containing GRB2 like 3, endophilin A3 [Source:VGNC Symbol;Acc:VGNC:34574]	SH3GL3	2.92033	2.98601	1.76634	0.000166589	0.00263206
ENSBTAG00000019916	505010	calmin [Source:VGNC Symbol;Acc:VGNC:27452]	CLMN	-1.7943	3.16177	0.000154782	0.00244171		ENSBTAG00000005574	280750	clusterin [Source:NCBI gene (formerly Entrezgene);Acc:280750]	CLU	-1.28554	-1.28569	7.79595	0.000167381	0.00264046
ENSBTAG00000016915	503620	fms related receptor tyrosine kinase 1 [Source:VGNC Symbol;Acc:VGNC:29041]	FLT1	2.52015	2.37819	0.000156075	0.00245511		ENSBTAG00000021752	541274	DnaJ heat shock protein family (Hsp40) member B4 [Source:VGNC Symbol;Acc:VGNC:55166]	DNAJB4	1.48504	1.48871	3.86912	0.000168153	0.00264854
ENSBTAG00000035615	616181	UPF3B regulator of nonsense mediated mRNA decay [Source:VGNC Symbol;Acc:VGNC:36683]	UPF3B	1.11598	6.5388	0.000156263	0.00245511		ENSBTAG00000008180	515158	spindle apparatus coiled-coil protein 1 [Source:VGNC Symbol;Acc:VGNC:50114]	SPDL1	1.39383	1.39498	5.26833	0.00017065	0.00268371
ENSBTAG00000022489	509283	E3 ubiquitin-protein ligase RNF213 [Source:NCBI gene (formerly Entrezgene);Acc:509283]	0	3.41204	1.47416	0.000156355	0.00245511		ENSBTAG00000002298	507498	cytoskeleton associated protein 2 like [Source:VGNC Symbol;Acc:VGNC:27381]	CKAP2L	1.09752	1.09779	6.85802	0.000173603	0.00272594
ENSBTAG00000011505	504785	rabaptin, RAB GTPase binding effector protein 1 [Source:VGNC Symbol;Acc:VGNC:33667]	RABEP1	1.2223	5.76894	0.000157213	0.00246477		ENSBTAG00000050526	#N/A	0	0	-1.60393	-1.61078	3.02282	0.00017632	0.00276431
ENSBTAG00000020412	522707	RAP2A, member of RAS oncogene family [Source:VGNC Symbol;Acc:VGNC:33719]	RAP2A	2.58188	1.77257	0.000159062	0.00248994		ENSBTAG00000019453	282019	prostaglandin E synthase [Source:VGNC Symbol;Acc:VGNC:33505]	PTGES	-2.08852	-2.09736	3.21802	0.00017659	0.00276431
ENSBTAG00000019845	100140210	ubiquitin specific peptidase 30 [Source:VGNC Symbol;Acc:VGNC:53928]	USP30	1.76931	3.10477	0.000159742	0.00249673		ENSBTAG00000047338	100298760	discoidin, CUB and LCCL domain containing 1 [Source:VGNC Symbol;Acc:VGNC:27908]	DCBLD1	2.74374	2.77839	2.1421	0.000178231	0.00278572
ENSBTAG00000004177	507983	tetratricopeptide repeat, ankyrin repeat and coiled-coil containing 1 [Source:VGNC Symbol;Acc:VGNC:35591]	TANC1	1.61184	3.84086	0.000160085	0.00249826		ENSBTAG00000016305	521728	ATPase 13A4 [Source:VGNC Symbol;Acc:VGNC:26280]	ATP13A4	-4.35722	-4.78405	0.7649	0.000178707	0.00278887
ENSBTAG00000002292	535439	SWI/SNF related, matrix associated, actin dependent regulator of chromatin, subfamily a, member 1 [Source:VGNC Symbol;Acc:VGNC:34985]	SMARCA1	2.09424	5.13841	0.000161532	0.00251698		ENSBTAG00000016046	541186	golgi associated PDZ and coiled-coil motif containing [Source:VGNC Symbol;Acc:VGNC:53793]	GOPC	1.65735	1.66129	3.73275	0.000182221	0.00283935
ENSBTAG00000001992	505060	cytochrome P450, family 51, subfamily A, polypeptide 1 [Source:NCBI gene (formerly Entrezgene);Acc:505060]	CYP51A1	0.988761	8.50071	0.000162163	0.00252295		ENSBTAG00000005929	#N/A	spectrin beta, non-erythrocytic 2 [Source:HGNC Symbol;Acc:HGNC:11276]	SPTBN2	1.59539	1.60167	2.91122	0.000183028	0.00284756
ENSBTAG00000010532	508582	potassium channel tetramerization domain containing 11 [Source:VGNC Symbol;Acc:VGNC:30501]	KCTD11	-0.964829	7.35589	0.000162919	0.00253083		ENSBTAG00000021170	511255	oxysterol binding protein like 9 [Source:VGNC Symbol;Acc:VGNC:32467]	OSBPL9	1.66386	1.66728	3.96656	0.000183604	0.00285217
ENSBTAG00000051886	#N/A	0	0	2.58937	1.34905	0.000163192	0.00253122		ENSBTAG00000017213	510905	microfibril associated protein 1 [Source:VGNC Symbol;Acc:VGNC:31421]	MFAP1	1.15466	1.15503	6.50966	0.000184982	0.0028692
ENSBTAG00000027279	#N/A	#N/A	#N/A	2.9453	1.15348	0.000164053	0.0025407		ENSBTAG00000017026	540874	DEP domain containing 1B [Source:VGNC Symbol;Acc:VGNC:28005]	DEPDC1B	2.54333	2.57716	1.91903	0.000185615	0.00287464
ENSBTAG00000010451	540272	proliferation-associated 2G4 [Source:VGNC Symbol;Acc:VGNC:82306]	PA2G4	1.22718	9.73188	0.000166384	0.0025647		ENSBTAG00000013042	531907	exocyst complex component 5 [Source:VGNC Symbol;Acc:VGNC:28649]	EXOC5	1.04862	1.04928	5.57372	0.000186711	0.00288468
ENSBTAG00000016563	538893	golgin A4 [Source:VGNC Symbol;Acc:VGNC:29485]	GOLGA4	1.14741	7.40506	0.00016642	0.0025647		ENSBTAG00000001573	781067	jumonji domain containing 1C [Source:VGNC Symbol;Acc:VGNC:30376]	JMJD1C	1.2869	1.28773	5.53043	0.000186831	0.00288468
ENSBTAG00000011319	515193	SAFB like transcription modulator [Source:VGNC Symbol;Acc:VGNC:34970]	SLTM	1.51273	7.13401	0.000166617	0.0025647		ENSBTAG00000025669	768038	beta-1,3-galactosyltransferase 4 [Source:VGNC Symbol;Acc:VGNC:26374]	B3GALT4	-1.84995	-1.86168	2.5815	0.000187149	0.00288522
ENSBTAG00000017836	786262	ZFP57 zinc finger protein [Source:VGNC Symbol;Acc:VGNC:37165]	ZFP57	2.87436	2.63292	0.000166725	0.0025647		ENSBTAG00000005603	516104	C-X-C motif chemokine ligand 11 [Source:VGNC Symbol;Acc:VGNC:27847]	CXCL11	2.68878	2.70087	4.01499	0.000188328	0.002899
ENSBTAG00000005116	783009	FKBP prolyl isomerase 15 [Source:VGNC Symbol;Acc:VGNC:29020]	FKBP15	2.03076	2.44007	0.000166863	0.0025647		ENSBTAG00000020432	767858	MIS12 kinetochore complex component [Source:VGNC Symbol;Acc:VGNC:31484]	MIS12	1.67565	1.6781	4.5392	0.000189191	0.00290788
ENSBTAG00000000532	538883	exonuclease 5 [Source:VGNC Symbol;Acc:VGNC:59180]	EXO5	-1.08165	5.65681	0.00016782	0.00257552		ENSBTAG00000030616	515542	zinc finger CCHC-type containing 10 [Source:VGNC Symbol;Acc:VGNC:37115]	ZCCHC10	1.57643	1.57819	4.81807	0.000189964	0.00291164
ENSBTAG00000045757	509486	troponin C1, slow skeletal and cardiac type [Source:VGNC Symbol;Acc:VGNC:36189]	TNNC1	-1.30211	5.81634	0.000171308	0.00262509		ENSBTAG00000000517	526872	ankyrin repeat domain 29 [Source:VGNC Symbol;Acc:VGNC:25921]	ANKRD29	-1.25726	-1.25995	3.92446	0.000190064	0.00291164
ENSBTAG00000054533	286850	G protein subunit gamma 12 [Source:NCBI gene (formerly Entrezgene);Acc:286850]	GNG12	1.54161	3.52805	0.000171811	0.00262749		ENSBTAG00000009272	505848	mitotic deacetylase associated SANT domain protein [Source:VGNC Symbol;Acc:VGNC:28444]	MIDEAS	1.66137	1.66598	3.72422	0.000190523	0.00291164
ENSBTAG00000010637	513067	arylsulfatase G [Source:VGNC Symbol;Acc:VGNC:55034]	ARSG	-2.26287	2.08109	0.000171981	0.00262749		ENSBTAG00000000586	533903	ciliogenesis and planar polarity effector 1 [Source:VGNC Symbol;Acc:VGNC:59329]	CPLANE1	1.30096	1.30291	4.40566	0.00019058	0.00291164
ENSBTAG00000006526	282152	BCL2 like 1 [Source:VGNC Symbol;Acc:VGNC:26446]	BCL2L1	-1.31317	5.14865	0.000172736	0.00263507		ENSBTAG00000033510	540423	myelin protein zero like 2 [Source:VGNC Symbol;Acc:VGNC:31593]	MPZL2	-2.79222	-2.82899	1.90576	0.000192349	0.00293427
ENSBTAG00000005990	281135	sphingosine-1-phosphate receptor 1 [Source:VGNC Symbol;Acc:VGNC:34252]	S1PR1	3.87429	2.0206	0.000173262	0.00263914		ENSBTAG00000016519	541284	membrane bound O-acyltransferase domain containing 1 [Source:VGNC Symbol;Acc:VGNC:31286]	MBOAT1	1.36005	1.36222	4.33722	0.000192768	0.00293625
ENSBTAG00000017310	516536	eva-1 homolog C [Source:VGNC Symbol;Acc:VGNC:28633]	EVA1C	-2.38814	1.54848	0.000173613	0.00264052		ENSBTAG00000022520	353120	BRCA1 DNA repair associated [Source:VGNC Symbol;Acc:VGNC:55781]	BRCA1	1.7685	1.77283	3.97725	0.000193187	0.00293823
ENSBTAG00000051299	#N/A	0	0	1.47744	4.43169	0.000174015	0.00264269		ENSBTAG00000005903	534450	LDL receptor related protein 5 [Source:VGNC Symbol;Acc:VGNC:97281]	LRP5	-2.37899	-2.40879	2.44607	0.00019387	0.00294422
ENSBTAG00000000571	789296	Rho GTPase activating protein 27 [Source:VGNC Symbol;Acc:VGNC:26085]	ARHGAP27	-1.76937	2.66003	0.000174926	0.00265208		ENSBTAG00000044074	519864	MLLT10 histone lysine methyltransferase DOT1L cofactor [Source:VGNC Symbol;Acc:VGNC:58389]	MLLT10	1.37466	1.37846	3.64179	0.000195449	0.00296378
ENSBTAG00000019929	281875	integrin subunit alpha V [Source:VGNC Symbol;Acc:VGNC:30323]	ITGAV	2.01625	3.02584	0.000175155	0.00265208		ENSBTAG00000014882	#N/A	#N/A	#N/A	-2.54717	-2.57398	2.28225	0.000195829	0.00296512
ENSBTAG00000023026	281376	serpin family B member 2-like [Source:NCBI gene (formerly Entrezgene);Acc:281376]	0	-3.9635	4.84575	0.000178572	0.0026998		ENSBTAG00000013045	525619	dyskerin pseudouridine synthase 1 [Source:VGNC Symbol;Acc:VGNC:28078]	DKC1	1.14443	1.14454	8.11288	0.000196651	0.00297038
ENSBTAG00000007167	536389	zinc finger MYM-type containing 5 [Source:VGNC Symbol;Acc:VGNC:56647]	ZMYM5	1.86426	3.24017	0.000179117	0.00270402		ENSBTAG00000017812	506969	ALS2 C-terminal like [Source:VGNC Symbol;Acc:VGNC:25852]	ALS2CL	-1.45536	-1.45728	4.5611	0.00019676	0.00297038
ENSBTAG00000011982	#N/A	#N/A	#N/A	2.19783	2.33402	0.000181578	0.00273712		ENSBTAG00000002726	540660	cell division cycle 27 [Source:VGNC Symbol;Acc:VGNC:50040]	CDC27	1.05146	1.05186	6.26804	0.000197078	0.00297077
ENSBTAG00000053398	787969	kinetochore scaffold 1 [Source:NCBI gene (formerly Entrezgene);Acc:787969]	KNL1	2.41855	3.48469	0.000182386	0.00274239		ENSBTAG00000002628	617624	solute carrier family 44 member 2 [Source:VGNC Symbol;Acc:VGNC:34876]	SLC44A2	-1.08632	-1.0865	7.3736	0.000199985	0.00301013
ENSBTAG00000003074	529171	solute carrier family 16 member 6 [Source:VGNC Symbol;Acc:VGNC:34692]	SLC16A6	3.62136	1.15935	0.000182467	0.00274239		ENSBTAG00000013658	519271	ELKS/RAB6-interacting/CAST family member 1 [Source:VGNC Symbol;Acc:VGNC:28566]	ERC1	2.38317	2.3974	3.11473	0.00020257	0.00304318
ENSBTAG00000007413	506914	centrosomal protein 41 [Source:VGNC Symbol;Acc:VGNC:27204]	CEP41	1.88167	2.83054	0.000182783	0.00274309		ENSBTAG00000024888	281972	phosphodiesterase 5A [Source:VGNC Symbol;Acc:VGNC:32678]	PDE5A	2.26001	2.27806	2.46697	0.000202973	0.00304318
ENSBTAG00000031579	532412	shugoshin 2 [Source:VGNC Symbol;Acc:VGNC:34546]	SGO2	1.21268	6.47482	0.000183697	0.00275275		ENSBTAG00000010645	#N/A	#N/A	#N/A	-6.22603	-1.44269e+08	0.569238	0.000203325	0.00304318
ENSBTAG00000049163	540132	tetraspanin 9 [Source:NCBI gene (formerly Entrezgene);Acc:540132]	TSPAN9	-2.05455	5.11319	0.000186298	0.0027817		ENSBTAG00000024492	526769	tyrosine-protein phosphatase non-receptor type 11 [Source:NCBI gene (formerly Entrezgene);Acc:526769]	0	-2.85263	-2.90778	1.41117	0.000203377	0.00304318
ENSBTAG00000006027	534067	ubiquitin specific peptidase 34 [Source:VGNC Symbol;Acc:VGNC:36724]	USP34	1.29688	5.19321	0.000186329	0.0027817		ENSBTAG00000008951	280994	alkaline phosphatase, biomineralization associated [Source:VGNC Symbol;Acc:VGNC:25850]	ALPL	-2.00307	-2.00908	3.44794	0.000205785	0.00307468
ENSBTAG00000012278	541159	myotubularin related protein 12 [Source:VGNC Symbol;Acc:VGNC:31739]	MTMR12	3.20364	0.88505	0.000186772	0.0027817		ENSBTAG00000003443	516420	ubiquitin specific peptidase 46 [Source:VGNC Symbol;Acc:VGNC:52847]	USP46	1.13174	1.13242	5.74463	0.00020658	0.00308204
ENSBTAG00000019639	507462	sorting nexin 16 [Source:VGNC Symbol;Acc:VGNC:35096]	SNX16	1.70031	3.25067	0.000186801	0.0027817		ENSBTAG00000016683	282291	NFKB inhibitor alpha [Source:VGNC Symbol;Acc:VGNC:32045]	NFKBIA	-1.06901	-1.06917	7.46724	0.000208455	0.00310547
ENSBTAG00000001573	781067	jumonji domain containing 1C [Source:VGNC Symbol;Acc:VGNC:30376]	JMJD1C	1.29777	5.53043	0.000186996	0.0027817		ENSBTAG00000000442	281444	retinol binding protein 4 [Source:VGNC Symbol;Acc:VGNC:33815]	RBP4	-1.06922	-1.06957	6.2987	0.000209415	0.00311519
ENSBTAG00000006708	508410	ariadne RBR E3 ubiquitin protein ligase 1 [Source:VGNC Symbol;Acc:VGNC:26133]	ARIH1	1.07067	6.36519	0.000188345	0.00279497		ENSBTAG00000005144	508493	patatin like phospholipase domain containing 2 [Source:VGNC Symbol;Acc:VGNC:33091]	PNPLA2	-1.36864	-1.36967	5.26899	0.000211337	0.0031392
ENSBTAG00000011865	515389	metastasis associated 1 family member 2 [Source:VGNC Symbol;Acc:VGNC:31714]	MTA2	-1.29756	4.84259	0.000188659	0.00279497		ENSBTAG00000021762	535102	zinc finger CCCH-type containing 15 [Source:VGNC Symbol;Acc:VGNC:37103]	ZC3H15	1.12536	1.12555	7.44895	0.000213159	0.00316165
ENSBTAG00000017390	#N/A	#N/A	#N/A	3.33544	1.58202	0.000188712	0.00279497		ENSBTAG00000010670	520493	V-set and immunoglobulin domain containing 8 [Source:VGNC Symbol;Acc:VGNC:55697]	VSIG8	-2.08276	-2.09013	3.16969	0.000215347	0.00318946
ENSBTAG00000006501	785711	DDB1 and CUL4 associated factor 1 [Source:VGNC Symbol;Acc:VGNC:27899]	DCAF1	2.89175	1.6698	0.000190384	0.00281129		ENSBTAG00000025443	523042	folliculin interacting protein 1 [Source:VGNC Symbol;Acc:VGNC:29068]	FNIP1	3.39783	3.57362	0.99453	0.000217455	0.003216
ENSBTAG00000019627	614712	Thy-1 cell surface antigen [Source:VGNC Symbol;Acc:VGNC:35856]	THY1	2.78908	1.6544	0.000190589	0.00281129		ENSBTAG00000004294	536625	ecotropic viral integration site 5 like [Source:VGNC Symbol;Acc:VGNC:54622]	EVI5L	-1.61928	-1.62166	4.68817	0.000221003	0.00326372
ENSBTAG00000012371	532189	carboxypeptidase D [Source:VGNC Symbol;Acc:VGNC:27647]	CPD	1.75919	3.38504	0.000190642	0.00281129		ENSBTAG00000016267	281035	serpin family G member 1 [Source:VGNC Symbol;Acc:VGNC:54891]	SERPING1	-2.2158	-2.23348	2.23186	0.000222133	0.00327566
ENSBTAG00000001537	529661	tsukushi, small leucine rich proteoglycan [Source:VGNC Symbol;Acc:VGNC:54896]	TSKU	-1.20391	5.22015	0.000191952	0.00282295		ENSBTAG00000049368	#N/A	0	0	1.85063	1.86269	2.68741	0.00022319	0.00328649
ENSBTAG00000040116	511901	H1.10 linker histone [Source:VGNC Symbol;Acc:VGNC:83614]	H1-10	3.02651	2.77184	0.000191988	0.00282295		ENSBTAG00000018804	538194	cadherin EGF LAG seven-pass G-type receptor 2 [Source:VGNC Symbol;Acc:VGNC:27170]	CELSR2	-1.86657	-1.87333	3.44245	0.000224686	0.00330374
ENSBTAG00000011143	539679	karyopherin subunit alpha 1 [Source:VGNC Symbol;Acc:VGNC:30700]	KPNA1	1.34347	5.66127	0.000194063	0.00284933		ENSBTAG00000021857	538584	Rho GTPase activating protein 21 [Source:VGNC Symbol;Acc:VGNC:26080]	ARHGAP21	1.57761	1.57835	6.16016	0.00022636	0.00332353
ENSBTAG00000010598	519920	eukaryotic translation initiation factor 4E family member 2 [Source:VGNC Symbol;Acc:VGNC:28410]	EIF4E2	-1.19355	6.06086	0.000197116	0.00288999		ENSBTAG00000006504	522380	trichoplein keratin filament binding [Source:VGNC Symbol;Acc:VGNC:35697]	TCHP	1.23266	1.23374	5.07335	0.000227109	0.00332974
ENSBTAG00000051880	#N/A	#N/A	#N/A	4.92511	0.944776	0.000197891	0.00289718		ENSBTAG00000018238	507417	ankyrin repeat and BTB domain containing 1 [Source:VGNC Symbol;Acc:VGNC:25515]	ABTB1	-1.81772	-1.81922	5.33496	0.000227668	0.00333313
ENSBTAG00000020454	512397	leucine zipper tumor suppressor family member 3 [Source:VGNC Symbol;Acc:VGNC:31123]	LZTS3	1.85181	3.7706	0.000198492	0.0029018		ENSBTAG00000032674	100298192	SUMO specific peptidase 5 [Source:VGNC Symbol;Acc:VGNC:34447]	SENP5	2.66922	2.69638	2.0554	0.000228288	0.00333434
ENSBTAG00000022989	614841	family with sequence similarity 174 member B [Source:VGNC Symbol;Acc:VGNC:28762]	FAM174B	-3.31578	2.43737	0.000198964	0.00290325		ENSBTAG00000051880	#N/A	#N/A	#N/A	4.30102	4.56868	0.944776	0.000228406	0.00333434
ENSBTAG00000020012	767817	cell division cycle 5 like [Source:VGNC Symbol;Acc:VGNC:27080]	CDC5L	1.03239	7.04704	0.000199161	0.00290325		ENSBTAG00000052707	#N/A	0	0	2.78031	2.81304	2.17371	0.000228938	0.00333731
ENSBTAG00000013204	523889	ATPase 13A3 [Source:VGNC Symbol;Acc:VGNC:26279]	ATP13A3	2.37356	3.95471	0.000200752	0.0029174		ENSBTAG00000044010	#N/A	embigin [Source:HGNC Symbol;Acc:HGNC:30465]	EMB	1.66031	1.66912	2.74506	0.000232113	0.00337875
ENSBTAG00000021151	317655	myosin heavy chain 10 [Source:VGNC Symbol;Acc:VGNC:31794]	MYH10	2.06926	8.90254	0.000200938	0.0029174		ENSBTAG00000017549	281885	KIT ligand [Source:VGNC Symbol;Acc:VGNC:30619]	KITLG	2.86406	2.89705	2.48833	0.000234827	0.00341338
ENSBTAG00000022580	616754	inka box actin regulator 2 [Source:VGNC Symbol;Acc:VGNC:50127]	INKA2	-1.06957	6.71307	0.000200992	0.0029174		ENSBTAG00000011981	338034	MYB proto-oncogene like 1 [Source:VGNC Symbol;Acc:VGNC:31778]	MYBL1	2.00004	2.0079	3.56991	0.000235841	0.00342108
ENSBTAG00000001575	100297344	calmodulin 2 [Source:NCBI gene (formerly Entrezgene);Acc:100297344]	CALM2	1.11896	8.39004	0.000203505	0.00294967		ENSBTAG00000032122	517359	CD19 molecule [Source:VGNC Symbol;Acc:VGNC:27007]	CD19	-1.60833	-1.61312	3.4673	0.000236072	0.00342108
ENSBTAG00000047991	789854	TATA-box binding protein associated factor 4 [Source:VGNC Symbol;Acc:VGNC:57029]	TAF4	1.55474	3.27878	0.000205058	0.00296795		ENSBTAG00000006323	506218	sorting nexin 9 [Source:VGNC Symbol;Acc:VGNC:35115]	SNX9	1.08311	1.08399	5.29758	0.000236365	0.00342108
ENSBTAG00000013317	613812	ring finger protein 168 [Source:VGNC Symbol;Acc:VGNC:97307]	RNF168	1.67862	3.96139	0.000205589	0.00296877		ENSBTAG00000035615	616181	UPF3B regulator of nonsense mediated mRNA decay [Source:VGNC Symbol;Acc:VGNC:36683]	UPF3B	1.08327	1.08359	6.5388	0.000237052	0.00342614
ENSBTAG00000039172	519260	RAB GTPase activating protein 1 [Source:NCBI gene (formerly Entrezgene);Acc:519260]	RABGAP1	2.19281	2.8278	0.000206037	0.00296877		ENSBTAG00000021538	523485	myosin IE [Source:VGNC Symbol;Acc:VGNC:31820]	MYO1E	1.8228	1.83477	2.60022	0.00024184	0.00349038
ENSBTAG00000005042	281510	synapsin I [Source:NCBI gene (formerly Entrezgene);Acc:281510]	SYN1	-1.5608	3.13846	0.000206298	0.00296877		ENSBTAG00000008541	493719	microsomal glutathione S-transferase 1 [Source:VGNC Symbol;Acc:VGNC:31451]	MGST1	-2.75296	-2.75969	4.61502	0.00024231	0.00349221
ENSBTAG00000025426	540197	nuclear receptor binding SET domain protein 1 [Source:VGNC Symbol;Acc:VGNC:55067]	NSD1	2.30896	2.79384	0.00020649	0.00296877		ENSBTAG00000021656	519751	sperm antigen with calponin homology and coiled-coil domains 1 like [Source:NCBI gene (formerly Entrezgene);Acc:519751]	SPECC1L	3.94483	4.12607	1.19665	0.00024302	0.00349749
ENSBTAG00000014248	508556	MIER family member 3 [Source:VGNC Symbol;Acc:VGNC:31471]	MIER3	2.08296	2.09292	0.000206765	0.00296877		ENSBTAG00000010802	532497	potassium two pore domain channel subfamily K member 7 [Source:VGNC Symbol;Acc:VGNC:30477]	KCNK7	-2.20069	-2.22766	2.23403	0.000244151	0.00350881
ENSBTAG00000005773	506980	phosphoglucomutase 2 [Source:VGNC Symbol;Acc:VGNC:32794]	PGM2	1.74205	4.6881	0.000206865	0.00296877		ENSBTAG00000012090	281780	alpha-galactosyltransferase 1 (glycoprotein) [Source:NCBI gene (formerly Entrezgene);Acc:281780]	GGTA1	1.34454	1.3458	5.03091	0.000245574	0.00352428
ENSBTAG00000010645	#N/A	#N/A	#N/A	-6.29987	0.569238	0.000207214	0.00296957		ENSBTAG00000008348	785034	nucleolar protein 4 like [Source:NCBI gene (formerly Entrezgene);Acc:785034]	NOL4L	-1.10605	-1.10714	5.01302	0.000246992	0.00353963
ENSBTAG00000008951	280994	alkaline phosphatase, biomineralization associated [Source:VGNC Symbol;Acc:VGNC:25850]	ALPL	-2.14025	3.44794	0.000208981	0.0029907		ENSBTAG00000019614	535402	family with sequence similarity 76 member A [Source:VGNC Symbol;Acc:VGNC:28827]	FAM76A	3.42519	3.49369	1.75754	0.00024735	0.00353979
ENSBTAG00000012828	534252	TBC1 domain family member 15 [Source:VGNC Symbol;Acc:VGNC:35629]	TBC1D15	1.3326	4.128	0.000209815	0.00299841		ENSBTAG00000013462	516017	L1 cell adhesion molecule [Source:VGNC Symbol;Acc:VGNC:30760]	L1CAM	-1.84023	-1.84303	4.53579	0.000251401	0.00358888
ENSBTAG00000033510	540423	myelin protein zero like 2 [Source:VGNC Symbol;Acc:VGNC:31593]	MPZL2	-3.02923	1.90576	0.000211999	0.00302537		ENSBTAG00000002613	507661	MIS18 binding protein 1 [Source:VGNC Symbol;Acc:VGNC:59350]	MIS18BP1	1.40823	1.40918	5.58653	0.000251486	0.00358888
ENSBTAG00000009154	#N/A	U2 snRNP associated SURP domain containing [Source:VGNC Symbol;Acc:VGNC:36557]	U2SURP	1.92242	4.6202	0.000213009	0.00303553		ENSBTAG00000000898	512581	coagulation factor II thrombin receptor like 2 [Source:VGNC Symbol;Acc:VGNC:28685]	F2RL2	-1.57059	-1.57103	6.58107	0.000253219	0.00360854
ENSBTAG00000003541	100137855	zinc finger protein 614 [Source:VGNC Symbol;Acc:VGNC:37313]	ZNF614	1.77596	1.97894	0.000214358	0.00305047		ENSBTAG00000051435	100124429	ZFP30 zinc finger protein [Source:NCBI gene (formerly Entrezgene);Acc:100124429]	ZFP30	-2.09157	-2.1096	2.38326	0.000254582	0.0036229
ENSBTAG00000038298	512697	coiled-coil domain containing 174 [Source:VGNC Symbol;Acc:VGNC:26871]	CCDC174	1.1342	5.83718	0.000219928	0.00312538		ENSBTAG00000020569	282608	calcium voltage-gated channel auxiliary subunit alpha2delta 1 [Source:VGNC Symbol;Acc:VGNC:26679]	CACNA2D1	3.30779	3.41511	1.53339	0.000255757	0.00363453
ENSBTAG00000024657	529006	ZFP91 zinc finger protein, atypical E3 ubiquitin ligase [Source:NCBI gene (formerly Entrezgene);Acc:529006]	0	1.31043	6.95265	0.000220473	0.00312875		ENSBTAG00000017877	507718	nectin cell adhesion molecule 4 [Source:VGNC Symbol;Acc:VGNC:55633]	NECTIN4	-1.67332	-1.67421	5.89013	0.000256461	0.00363629
ENSBTAG00000009443	404167	glucosaminyl (N-acetyl) transferase 3, mucin type [Source:NCBI gene (formerly Entrezgene);Acc:404167]	GCNT3	-2.3695	2.75471	0.00022937	0.00325047		ENSBTAG00000003399	537503	SWI/SNF related, matrix associated, actin dependent regulator of chromatin, subfamily a, member 5 [Source:VGNC Symbol;Acc:VGNC:34988]	SMARCA5	1.62784	1.62826	6.96608	0.000256595	0.00363629
ENSBTAG00000037726	281986	phospholipase C delta 1 [Source:VGNC Symbol;Acc:VGNC:32984]	PLCD1	-1.09851	5.44117	0.000230081	0.00325601		ENSBTAG00000001151	513154	amyloid beta precursor like protein 1 [Source:VGNC Symbol;Acc:VGNC:26019]	APLP1	-1.42205	-1.42564	3.69995	0.00025859	0.00365946
ENSBTAG00000001499	533296	tripartite motif containing 33 [Source:VGNC Symbol;Acc:VGNC:36329]	TRIM33	1.9552	3.20022	0.000230547	0.00325807		ENSBTAG00000018125	538771	kinesin family member 5C [Source:VGNC Symbol;Acc:VGNC:30607]	KIF5C	2.37868	2.40025	2.38741	0.00025993	0.00366985
ENSBTAG00000038920	783566	vacuolar protein sorting 13 homolog C [Source:VGNC Symbol;Acc:VGNC:36810]	VPS13C	1.80207	3.54765	0.000232353	0.00327905		ENSBTAG00000006507	534082	ADAM metallopeptidase with thrombospondin type 1 motif 3 [Source:VGNC Symbol;Acc:VGNC:25626]	ADAMTS3	3.09471	3.14846	1.75566	0.000260046	0.00366985
ENSBTAG00000025929	782907	methylthioadenosine phosphorylase [Source:NCBI gene (formerly Entrezgene);Acc:782907]	0	1.19222	5.41996	0.000232918	0.00328247		ENSBTAG00000024657	529006	ZFP91 zinc finger protein, atypical E3 ubiquitin ligase [Source:NCBI gene (formerly Entrezgene);Acc:529006]	0	1.29045	1.29077	6.95265	0.00026112	0.00367514
ENSBTAG00000004449	538147	diacylglycerol kinase epsilon [Source:VGNC Symbol;Acc:VGNC:28027]	DGKE	2.5977	1.51101	0.000235415	0.00331307		ENSBTAG00000016944	#N/A	#N/A	#N/A	-3.19748	-3.26238	1.73415	0.000261143	0.00367514
ENSBTAG00000003329	327681	follistatin [Source:VGNC Symbol;Acc:VGNC:29134]	FST	1.24913	8.8679	0.000236354	0.00332169		ENSBTAG00000013454	540203	TGF-beta activated kinase 1 (MAP3K7) binding protein 2 [Source:VGNC Symbol;Acc:VGNC:53809]	TAB2	2.73158	2.77862	1.64441	0.000263579	0.0037043
ENSBTAG00000020505	540582	strawberry notch homolog 1 [Source:VGNC Symbol;Acc:VGNC:34308]	SBNO1	1.34332	6.26434	0.000238468	0.00334575		ENSBTAG00000023279	541201	NEDD4 binding protein 2 like 2 [Source:VGNC Symbol;Acc:VGNC:53827]	N4BP2L2	1.2995	1.30139	4.48293	0.000264343	0.00370992
ENSBTAG00000045862	525159	fermitin family member 3 [Source:NCBI gene (formerly Entrezgene);Acc:525159]	FERMT3	-3.10284	0.703452	0.000238724	0.00334575		ENSBTAG00000021575	526153	bromodomain containing 7 [Source:VGNC Symbol;Acc:VGNC:26560]	BRD7	1.18208	1.1825	6.42085	0.000265737	0.00372434
ENSBTAG00000046140	100125919	neural proliferation, differentiation and control 1 [Source:VGNC Symbol;Acc:VGNC:55066]	NPDC1	-1.24154	5.03106	0.000240425	0.00336062		ENSBTAG00000012820	513275	syntaxin 3 [Source:VGNC Symbol;Acc:VGNC:35439]	STX3	-3.6428	-3.75811	1.53573	0.000266939	0.00373604
ENSBTAG00000012694	538770	U2AF homology motif kinase 1 [Source:VGNC Symbol;Acc:VGNC:36653]	UHMK1	3.19774	1.93092	0.000240445	0.00336062		ENSBTAG00000019054	614555	epithelial stromal interaction 1 [Source:VGNC Symbol;Acc:VGNC:28557]	EPSTI1	1.87298	1.87667	4.34712	0.000269014	0.00375991
ENSBTAG00000002717	532236	internexin neuronal intermediate filament protein alpha [Source:VGNC Symbol;Acc:VGNC:30191]	INA	-2.34725	1.45412	0.000241155	0.00336351		ENSBTAG00000003532	508893	TLE family member 4, transcriptional corepressor [Source:VGNC Symbol;Acc:VGNC:35892]	TLE4	1.49083	1.49317	4.33527	0.000269569	0.0037625
ENSBTAG00000001231	281996	cadherin related family member 1 [Source:VGNC Symbol;Acc:VGNC:27108]	CDHR1	-1.94579	2.47534	0.000241313	0.00336351		ENSBTAG00000001886	787049	family with sequence similarity 122B [Source:VGNC Symbol;Acc:VGNC:50154]	FAM122B	2.04716	2.06662	2.10814	0.000270985	0.00377284
ENSBTAG00000046239	100849063	ligand dependent nuclear receptor corepressor [Source:NCBI gene (formerly Entrezgene);Acc:100849063]	LCOR	2.12911	2.35183	0.000244669	0.00340562		ENSBTAG00000011802	511422	collagen type VI alpha 1 chain [Source:VGNC Symbol;Acc:VGNC:27570]	COL6A1	2.98824	3.03658	1.8705	0.000271161	0.00377284
ENSBTAG00000002726	540660	cell division cycle 27 [Source:VGNC Symbol;Acc:VGNC:50040]	CDC27	1.0415	6.26804	0.000245074	0.0034066		ENSBTAG00000025622	516457	DEF6 guanine nucleotide exchange factor [Source:VGNC Symbol;Acc:VGNC:27986]	DEF6	-8.07791	-1.44269e+08	1.76885	0.000271422	0.00377284
ENSBTAG00000027787	#N/A	#N/A	#N/A	1.39446	6.20086	0.000246067	0.00341574		ENSBTAG00000009676	373543	serine/threonine kinase 25 [Source:VGNC Symbol;Acc:VGNC:35391]	STK25	-1.19564	-1.19608	6.36077	0.000272401	0.00378128
ENSBTAG00000005967	527153	ubiquitin protein ligase E3 component n-recognin 2 [Source:VGNC Symbol;Acc:VGNC:36617]	UBR2	1.60313	3.2129	0.000248228	0.00344104		ENSBTAG00000011643	537682	SOS Ras/Rac guanine nucleotide exchange factor 1 [Source:VGNC Symbol;Acc:VGNC:35134]	SOS1	2.91889	2.97168	1.98619	0.000275035	0.00381264
ENSBTAG00000012078	404082	transmembrane protein 176A [Source:VGNC Symbol;Acc:VGNC:36000]	TMEM176A	-1.80157	2.65844	0.000248724	0.00344322		ENSBTAG00000021052	513071	G protein subunit beta 1 like [Source:VGNC Symbol;Acc:VGNC:29458]	GNB1L	-1.44023	-1.44269	4.18843	0.000275577	0.00381496
ENSBTAG00000017597	535035	establishment of sister chromatid cohesion N-acetyltransferase 1 [Source:VGNC Symbol;Acc:VGNC:28599]	ESCO1	1.96647	2.31159	0.000249383	0.00344765		ENSBTAG00000043584	3283882	ATP synthase F0 subunit 6 [Source:NCBI gene (formerly Entrezgene);Acc:3283882]	ATP6	-1.39553	-1.39554	11.5122	0.000275978	0.00381533
ENSBTAG00000019513	617008	chromosome 11 C9orf50 homolog [Source:VGNC Symbol;Acc:VGNC:52622]	C11H9orf50	-1.45336	4.14509	0.000249791	0.00344861		ENSBTAG00000009579	517520	centrosomal protein 85 [Source:VGNC Symbol;Acc:VGNC:27216]	CEP85	2.43159	2.46484	1.82372	0.00027785	0.00383178
ENSBTAG00000012047	525246	Janus kinase 2 [Source:VGNC Symbol;Acc:VGNC:30365]	JAK2	2.08902	2.3874	0.000253775	0.00349698		ENSBTAG00000009368	617367	Ras related GTP binding C [Source:VGNC Symbol;Acc:VGNC:34160]	RRAGC	1.33185	1.33283	5.37368	0.000277922	0.00383178
ENSBTAG00000018160	506387	laminin subunit alpha 1 [Source:VGNC Symbol;Acc:VGNC:30769]	LAMA1	3.04308	2.8736	0.000253982	0.00349698		ENSBTAG00000013317	613812	ring finger protein 168 [Source:VGNC Symbol;Acc:VGNC:97307]	RNF168	1.60642	1.60988	3.96139	0.000279109	0.00384294
ENSBTAG00000020277	100138150	protein phosphatase 2 scaffold subunit Abeta [Source:VGNC Symbol;Acc:VGNC:33254]	PPP2R1B	1.78149	2.93042	0.000261108	0.00359024		ENSBTAG00000010694	537799	BicC family RNA binding protein 1 [Source:VGNC Symbol;Acc:VGNC:26490]	BICC1	2.85896	2.87935	3.40437	0.00028045	0.00385618
ENSBTAG00000013004	534787	inter-alpha-trypsin inhibitor heavy chain 5 [Source:VGNC Symbol;Acc:VGNC:30337]	ITIH5	-8.75059	2.43788	0.000261507	0.00359087		ENSBTAG00000051886	#N/A	0	0	2.16266	2.19663	1.34905	0.000285195	0.00391614
ENSBTAG00000019807	513668	collagen type XXVII alpha 1 chain [Source:VGNC Symbol;Acc:VGNC:56941]	COL27A1	-1.73107	3.5924	0.000262371	0.00359788		ENSBTAG00000010255	538969	zinc finger protein 24 [Source:VGNC Symbol;Acc:VGNC:37232]	ZNF24	1.2734	1.27399	5.92875	0.000286969	0.00393373
ENSBTAG00000054287	539842	C1q and TNF related 2 [Source:NCBI gene (formerly Entrezgene);Acc:539842]	C1QTNF2	-3.87835	0.711257	0.000263506	0.00360858		ENSBTAG00000004901	537790	phosphatidylinositol-4-phosphate 3-kinase catalytic subunit type 2 alpha [Source:NCBI gene (formerly Entrezgene);Acc:537790]	PIK3C2A	1.97589	1.99584	2.06175	0.000287249	0.00393373
ENSBTAG00000006869	511990	PHD finger protein 20 like 1 [Source:VGNC Symbol;Acc:VGNC:32820]	PHF20L1	1.15904	6.35055	0.000265092	0.00362542		ENSBTAG00000012977	514949	catechol-O-methyltransferase domain containing 1 [Source:VGNC Symbol;Acc:VGNC:27591]	COMTD1	-1.34191	-1.3445	4.00034	0.000288006	0.00393879
ENSBTAG00000003239	510487	UTP20 small subunit processome component [Source:VGNC Symbol;Acc:VGNC:36744]	UTP20	1.57201	6.01981	0.000266058	0.00363375		ENSBTAG00000043949	532789	pro-apoptotic WT1 regulator [Source:NCBI gene (formerly Entrezgene);Acc:532789]	PAWR	1.13274	1.13315	6.48494	0.000289547	0.00395455
ENSBTAG00000007089	512533	FSHD region gene 1 [Source:NCBI gene (formerly Entrezgene);Acc:512533]	FRG1	1.08506	5.7093	0.000267107	0.00363841		ENSBTAG00000016169	497011	inhibitor of DNA binding 1, HLH protein [Source:VGNC Symbol;Acc:VGNC:30031]	ID1	-2.00203	-2.00274	6.84493	0.000291477	0.00397558
ENSBTAG00000006878	785085	TATA-box binding protein associated factor 1 [Source:NCBI gene (formerly Entrezgene);Acc:785085]	0	1.51262	3.32528	0.000267114	0.00363841		ENSBTAG00000018158	515372	transmembrane protein 139 [Source:VGNC Symbol;Acc:VGNC:35972]	TMEM139	-1.5011	-1.50584	3.6385	0.000292289	0.00398044
ENSBTAG00000004263	518974	ATPase H+ transporting V0 subunit a4 [Source:VGNC Symbol;Acc:VGNC:26309]	ATP6V0A4	-3.7376	0.963896	0.000270968	0.00368138		ENSBTAG00000007375	280858	macrophage migration inhibitory factor [Source:VGNC Symbol;Acc:VGNC:49557]	MIF	-2.77078	-2.79675	2.37549	0.000292616	0.00398044
ENSBTAG00000052965	101905010	0	0	-2.24732	2.39644	0.000270993	0.00368138		ENSBTAG00000037456	522105	AT-hook DNA binding motif containing 1 [Source:VGNC Symbol;Acc:VGNC:25753]	AHDC1	-1.43886	-1.43959	6.12341	0.000293815	0.00399141
ENSBTAG00000007698	507157	transmembrane protein 59 like [Source:VGNC Symbol;Acc:VGNC:36100]	TMEM59L	-1.06953	7.76009	0.000274282	0.00372109		ENSBTAG00000022689	616217	RING1 and YY1 binding protein [Source:NCBI gene (formerly Entrezgene);Acc:616217]	RYBP	1.43927	1.44056	5.19144	0.000297874	0.00404034
ENSBTAG00000006021	507479	centrosomal protein 250 [Source:VGNC Symbol;Acc:VGNC:27200]	CEP250	3.28749	1.51295	0.000274944	0.0037251		ENSBTAG00000002006	281530	thrombospondin 1 [Source:VGNC Symbol;Acc:VGNC:35828]	THBS1	1.32421	1.32425	10.1028	0.000298211	0.00404034
ENSBTAG00000050108	#N/A	0	0	1.98302	3.00662	0.000275468	0.00372724		ENSBTAG00000019938	540948	NEDD4 binding protein 1 [Source:VGNC Symbol;Acc:VGNC:31852]	N4BP1	1.24277	1.245	4.20607	0.000299641	0.00405396
ENSBTAG00000012142	514440	RAD18 E3 ubiquitin protein ligase [Source:VGNC Symbol;Acc:VGNC:33679]	RAD18	1.51059	3.63822	0.000286763	0.00387491		ENSBTAG00000002258	281631	apolipoprotein A1 [Source:VGNC Symbol;Acc:VGNC:26022]	APOA1	-1.13791	-1.13817	7.16235	0.000300013	0.00405396
ENSBTAG00000037935	533232	SWI/SNF related, matrix associated, actin dependent regulator of chromatin, subfamily d, member 1 [Source:VGNC Symbol;Acc:VGNC:34993]	SMARCD1	2.53565	2.93509	0.000287525	0.0038768		ENSBTAG00000016656	540789	poly(ADP-ribose) polymerase family member 14 [Source:NCBI gene (formerly Entrezgene);Acc:540789]	PARP14	1.3641	1.36573	4.76319	0.00030225	0.00407878
ENSBTAG00000047338	100298760	discoidin, CUB and LCCL domain containing 1 [Source:VGNC Symbol;Acc:VGNC:27908]	DCBLD1	2.5626	2.1421	0.000288174	0.0038768		ENSBTAG00000002586	509039	transcription factor 12 [Source:VGNC Symbol;Acc:VGNC:35686]	TCF12	1.58837	1.59561	3.07171	0.000303179	0.00408589
ENSBTAG00000001877	767875	high mobility group nucleosome binding domain 5 [Source:VGNC Symbol;Acc:VGNC:56709]	HMGN5	-1.18096	5.58623	0.000288317	0.0038768		ENSBTAG00000026971	613318	cell division cycle associated 5 [Source:VGNC Symbol;Acc:VGNC:56261]	CDCA5	2.43838	2.45699	2.59156	0.000308063	0.00414621
ENSBTAG00000044106	512910	scaffold protein involved in DNA repair [Source:VGNC Symbol;Acc:VGNC:35216]	SPIDR	-1.62024	3.29473	0.000288778	0.0038768		ENSBTAG00000003546	510059	transcription factor A, mitochondrial [Source:VGNC Symbol;Acc:VGNC:35775]	TFAM	2.04724	2.06057	2.48211	0.0003104	0.00417216
ENSBTAG00000011482	511955	solute carrier family 43 member 2 [Source:VGNC Symbol;Acc:VGNC:34875]	SLC43A2	-1.37109	5.32875	0.000288807	0.0038768		ENSBTAG00000020089	537257	ubiquitin specific peptidase 32 [Source:VGNC Symbol;Acc:VGNC:36722]	USP32	2.0884	2.1119	2.18081	0.000311535	0.00417379
ENSBTAG00000019938	540948	NEDD4 binding protein 1 [Source:VGNC Symbol;Acc:VGNC:31852]	N4BP1	1.24385	4.20607	0.000291677	0.00391017		ENSBTAG00000002033	613578	UBX domain protein 2A [Source:VGNC Symbol;Acc:VGNC:36625]	UBXN2A	1.20719	1.20972	3.91901	0.000311744	0.00417379
ENSBTAG00000030600	514131	bucentaur-2 [Source:NCBI gene (formerly Entrezgene);Acc:514131]	BCNT2	1.83257	5.15627	0.000294125	0.00393393		ENSBTAG00000009207	539121	lysine methyltransferase 2E (inactive) [Source:VGNC Symbol;Acc:VGNC:30694]	KMT2E	1.065	1.06532	6.6439	0.000311752	0.00417379
ENSBTAG00000015280	533161	kinesin family member 2C [Source:VGNC Symbol;Acc:VGNC:30601]	KIF2C	1.62666	4.97424	0.000294223	0.00393393		ENSBTAG00000001725	615107	C-X-C motif chemokine ligand 10 [Source:VGNC Symbol;Acc:VGNC:27846]	CXCL10	3.60342	3.6728	2.49153	0.000315449	0.00421773
ENSBTAG00000020989	508637	sushi domain containing 4 [Source:VGNC Symbol;Acc:VGNC:35489]	SUSD4	-2.38717	1.56559	0.000296243	0.00395574		ENSBTAG00000040490	509875	coiled-coil domain containing 3 [Source:NCBI gene (formerly Entrezgene);Acc:509875]	CCDC3	-1.94787	-1.94981	5.31675	0.000316318	0.0042238
ENSBTAG00000018238	507417	ankyrin repeat and BTB domain containing 1 [Source:VGNC Symbol;Acc:VGNC:25515]	ABTB1	-1.7866	5.33496	0.000296832	0.00395841		ENSBTAG00000015839	281295	microtubule associated protein 4 [Source:NCBI gene (formerly Entrezgene);Acc:281295]	MAP4	3.42112	3.51181	1.77219	0.000321033	0.00428113
ENSBTAG00000004561	286857	paired box 6 [Source:VGNC Symbol;Acc:VGNC:32598]	PAX6	1.56053	2.94589	0.000298824	0.00397976		ENSBTAG00000030671	785042	hook microtubule tethering protein 1 [Source:VGNC Symbol;Acc:VGNC:29905]	HOOK1	-2.98445	-3.02196	2.35242	0.000322724	0.00429805
ENSBTAG00000016069	518601	ADP ribosylation factor 4 [Source:VGNC Symbol;Acc:VGNC:26059]	ARF4	2.63491	1.86111	0.00031126	0.00413996		ENSBTAG00000003220	528076	atypical chemokine receptor 1 [Source:VGNC Symbol;Acc:VGNC:58436]	ACKR1	-3.90335	-4.1285	1.08567	0.000323276	0.00429978
ENSBTAG00000010550	506307	eukaryotic translation initiation factor 5A2 [Source:VGNC Symbol;Acc:VGNC:28419]	EIF5A2	2.34174	1.47471	0.000311732	0.00414083		ENSBTAG00000048655	281363	5'-nucleotidase ecto [Source:NCBI gene (formerly Entrezgene);Acc:281363]	NT5E	-4.64476	-5.07472	1.32865	0.000324695	0.00430528
ENSBTAG00000006489	541234	myosin VA [Source:VGNC Symbol;Acc:VGNC:31826]	MYO5A	1.23819	5.5313	0.000312342	0.00414352		ENSBTAG00000005960	538959	erythrocyte membrane protein band 4.1 like 2 [Source:VGNC Symbol;Acc:VGNC:28521]	EPB41L2	2.03143	2.04596	2.59109	0.000324789	0.00430528
ENSBTAG00000005763	514859	AKT1 substrate 1 [Source:VGNC Symbol;Acc:VGNC:25798]	AKT1S1	-1.25006	5.07656	0.000315521	0.00418024		ENSBTAG00000014917	524743	GTP binding protein 4 [Source:VGNC Symbol;Acc:VGNC:29710]	GTPBP4	0.957664	0.95778	7.79707	0.000324959	0.00430528
ENSBTAG00000018437	508938	structural maintenance of chromosomes 5 [Source:VGNC Symbol;Acc:VGNC:35002]	SMC5	1.45036	6.28841	0.000315956	0.00418056		ENSBTAG00000017090	781661	SMCR8-C9orf72 complex subunit [Source:VGNC Symbol;Acc:VGNC:58472]	SMCR8	3.39146	3.48201	1.39464	0.000325423	0.00430582
ENSBTAG00000012069	507353	coiled-coil domain containing 167 [Source:NCBI gene (formerly Entrezgene);Acc:507353]	CCDC167	-1.23395	7.05093	0.0003164	0.00418101		ENSBTAG00000044197	518089	EDAR associated death domain [Source:VGNC Symbol;Acc:VGNC:28319]	EDARADD	-1.98319	-2.00357	1.90782	0.000329307	0.00435155
ENSBTAG00000017840	509799	bromodomain adjacent to zinc finger domain 2A [Source:VGNC Symbol;Acc:VGNC:26430]	BAZ2A	1.13472	6.17909	0.000317835	0.00419452		ENSBTAG00000014788	513774	A-kinase anchoring protein 12 [Source:VGNC Symbol;Acc:VGNC:25782]	AKAP12	1.51019	1.51216	4.68395	0.000331766	0.00437836
ENSBTAG00000006844	#N/A	#N/A	#N/A	6.28113	0.642842	0.00031929	0.00420826		ENSBTAG00000011242	513051	mutY DNA glycosylase [Source:VGNC Symbol;Acc:VGNC:31765]	MUTYH	-1.5569	-1.56548	2.67914	0.000333317	0.00439313
ENSBTAG00000011876	513807	MORC family CW-type zinc finger 3 [Source:VGNC Symbol;Acc:VGNC:31556]	MORC3	1.40369	4.78096	0.000320055	0.00421289		ENSBTAG00000018342	407100	tight junction protein 3 [Source:VGNC Symbol;Acc:VGNC:35883]	TJP3	-2.31446	-2.35191	1.53323	0.000335457	0.00441561
ENSBTAG00000001887	538505	signal transducing adaptor molecule 2 [Source:VGNC Symbol;Acc:VGNC:97314]	STAM2	1.33456	4.533	0.000320878	0.004213		ENSBTAG00000002444	513220	marker of proliferation Ki-67 [Source:VGNC Symbol;Acc:VGNC:55960]	MKI67	1.24666	1.24678	8.38447	0.000340383	0.00447467
ENSBTAG00000018689	514719	DNA ligase 3 [Source:VGNC Symbol;Acc:VGNC:30883]	LIG3	1.85603	2.36554	0.000320892	0.004213		ENSBTAG00000010677	535165	LIM and calponin homology domains 1 [Source:VGNC Symbol;Acc:VGNC:30887]	LIMCH1	1.52157	1.52378	4.73234	0.000349125	0.00458367
ENSBTAG00000009115	512922	splA/ryanodine receptor domain and SOCS box containing 4 [Source:VGNC Symbol;Acc:VGNC:35249]	SPSB4	-4.17746	1.14256	0.00032605	0.00427454		ENSBTAG00000006726	526711	coiled-coil domain containing 102B [Source:VGNC Symbol;Acc:VGNC:56364]	CCDC102B	2.34984	2.38266	2.39544	0.000352645	0.00462392
ENSBTAG00000000644	509251	S100 calcium binding protein A5 [Source:VGNC Symbol;Acc:VGNC:34245]	S100A5	-2.01628	2.22149	0.000326583	0.00427454		ENSBTAG00000019627	614712	Thy-1 cell surface antigen [Source:VGNC Symbol;Acc:VGNC:35856]	THY1	2.43728	2.47294	1.6544	0.000356472	0.00466808
ENSBTAG00000040056	513386	leukotriene B4 receptor 2 [Source:VGNC Symbol;Acc:VGNC:31070]	LTB4R2	-2.5998	1.1066	0.00032684	0.00427454		ENSBTAG00000003577	532337	G1 to S phase transition 1 [Source:VGNC Symbol;Acc:VGNC:29681]	GSPT1	0.970346	0.970469	7.76249	0.000356989	0.00466885
ENSBTAG00000021896	784219	nucleoporin 214 [Source:VGNC Symbol;Acc:VGNC:32358]	NUP214	1.96505	2.22584	0.000328402	0.00428946		ENSBTAG00000003329	327681	follistatin [Source:VGNC Symbol;Acc:VGNC:29134]	FST	1.20828	1.20834	8.8679	0.000360259	0.00470525
ENSBTAG00000019614	535402	family with sequence similarity 76 member A [Source:VGNC Symbol;Acc:VGNC:28827]	FAM76A	3.53107	1.75754	0.000329464	0.00429697		ENSBTAG00000021766	522921	heparin binding EGF like growth factor [Source:VGNC Symbol;Acc:VGNC:29765]	HBEGF	2.55312	2.5708	2.38553	0.000360697	0.00470525
ENSBTAG00000004842	538571	ring finger and SPRY domain containing 1 [Source:VGNC Symbol;Acc:VGNC:34191]	RSPRY1	1.41335	3.47637	0.000329821	0.00429697		ENSBTAG00000023600	613972	apolipoprotein D [Source:VGNC Symbol;Acc:VGNC:26031]	APOD	-1.97826	-1.98397	3.43363	0.000362085	0.0047173
ENSBTAG00000051435	100124429	ZFP30 zinc finger protein [Source:NCBI gene (formerly Entrezgene);Acc:100124429]	ZFP30	-1.98884	2.38326	0.000334754	0.00435418		ENSBTAG00000005328	541255	interactor of little elongation complex ELL subunit 2 [Source:VGNC Symbol;Acc:VGNC:30027]	ICE2	1.43617	1.44117	3.05692	0.000364042	0.00473674
ENSBTAG00000015590	506286	ciliogenesis associated kinase 1 [Source:VGNC Symbol;Acc:VGNC:30028]	CILK1	1.62175	3.31995	0.000335068	0.00435418		ENSBTAG00000007779	522473	general transcription factor IIIC subunit 3 [Source:VGNC Symbol;Acc:VGNC:29704]	GTF3C3	1.46006	1.46593	3.02829	0.000365507	0.00474973
ENSBTAG00000039709	615510	PARP1 binding protein [Source:VGNC Symbol;Acc:VGNC:32588]	PARPBP	1.85251	2.86995	0.000339203	0.00440228		ENSBTAG00000015901	514000	armadillo repeat containing 1 [Source:VGNC Symbol;Acc:VGNC:26155]	ARMC1	0.937718	0.937948	6.84931	0.00036863	0.0047842
ENSBTAG00000012067	529859	ectopic P-granules autophagy protein 5 homolog [Source:VGNC Symbol;Acc:VGNC:28531]	EPG5	2.4876	1.67909	0.000342073	0.00442871		ENSBTAG00000021962	511003	BCLAF1 and THRAP3 family member 3 [Source:VGNC Symbol;Acc:VGNC:26452]	BCLAF3	1.52174	1.53133	2.6907	0.000370755	0.00480001
ENSBTAG00000048386	#N/A	0	0	1.50382	3.3745	0.000342109	0.00442871		ENSBTAG00000013238	511513	cyclin dependent kinase 12 [Source:VGNC Symbol;Acc:VGNC:27117]	CDK12	1.18127	1.18256	4.80413	0.000371088	0.00480001
ENSBTAG00000046545	100336730	myocyte enhancer factor 2D [Source:VGNC Symbol;Acc:VGNC:31374]	MEF2D	-1.28107	4.85129	0.000342886	0.00443311		ENSBTAG00000025426	540197	nuclear receptor binding SET domain protein 1 [Source:VGNC Symbol;Acc:VGNC:55067]	NSD1	2.12517	2.13766	2.79384	0.000371263	0.00480001
ENSBTAG00000005536	282462	male-enhanced antigen 1 [Source:NCBI gene (formerly Entrezgene);Acc:282462]	MEA1	-1.09692	6.17287	0.000345732	0.00446424		ENSBTAG00000019929	281875	integrin subunit alpha V [Source:VGNC Symbol;Acc:VGNC:30323]	ITGAV	1.81627	1.82432	3.02584	0.000376663	0.00486364
ENSBTAG00000010819	539099	homeobox containing 1 [Source:VGNC Symbol;Acc:VGNC:29869]	HMBOX1	1.30775	3.59107	0.000346489	0.00446834		ENSBTAG00000001537	529661	tsukushi, small leucine rich proteoglycan [Source:VGNC Symbol;Acc:VGNC:54896]	TSKU	-1.13854	-1.1394	5.22015	0.00038347	0.00494525
ENSBTAG00000011500	528555	calsequestrin 2 [Source:VGNC Symbol;Acc:VGNC:26787]	CASQ2	-3.11188	1.69728	0.000352739	0.00454319		ENSBTAG00000015303	535171	membrane palmitoylated protein 6 [Source:VGNC Symbol;Acc:VGNC:31585]	MPP6	1.28752	1.29012	3.96715	0.000384616	0.00495376
ENSBTAG00000000711	504499	N-myc downstream regulated 1 [Source:VGNC Symbol;Acc:VGNC:53868]	NDRG1	-0.995182	6.50642	0.00035406	0.00455444		ENSBTAG00000002082	613548	myristoylated alanine rich protein kinase C substrate [Source:VGNC Symbol;Acc:VGNC:31244]	MARCKS	1.94946	1.95683	3.11958	0.000386684	0.00497264
ENSBTAG00000019271	616033	asparaginyl-tRNA synthetase 1 [Source:NCBI gene (formerly Entrezgene);Acc:616033]	NARS1	0.974142	8.26278	0.000354531	0.00455473		ENSBTAG00000047856	513673	p21 (RAC1) activated kinase 2 [Source:VGNC Symbol;Acc:VGNC:53593]	PAK2	1.04393	1.04412	7.25167	0.00038706	0.00497264
ENSBTAG00000048991	613762	REC114 meiotic recombination protein [Source:NCBI gene (formerly Entrezgene);Acc:613762]	REC114	-4.28872	2.92047	0.000355024	0.00455532		ENSBTAG00000006614	510486	transmembrane and coiled-coil domain family 1 [Source:VGNC Symbol;Acc:VGNC:35925]	TMCC1	1.63277	1.64297	2.34095	0.000394765	0.00506524
ENSBTAG00000011363	536706	ecotropic viral integration site 5 [Source:VGNC Symbol;Acc:VGNC:55170]	EVI5	1.28267	4.68528	0.000356329	0.0045663		ENSBTAG00000051245	768313	SRY-box transcription factor 4 [Source:VGNC Symbol;Acc:VGNC:54491]	SOX4	1.60976	1.61212	4.51096	0.000395607	0.00506965
ENSBTAG00000014261	510075	threonyl-tRNA synthetase 1 [Source:VGNC Symbol;Acc:VGNC:35605]	TARS1	0.970301	7.88155	0.000358726	0.00459124		ENSBTAG00000015280	533161	kinesin family member 2C [Source:VGNC Symbol;Acc:VGNC:30601]	KIF2C	1.5524	1.55394	4.97424	0.000396122	0.00506986
ENSBTAG00000008096	281137	endothelin 1 [Source:VGNC Symbol;Acc:VGNC:28327]	EDN1	1.14968	6.45342	0.000366589	0.00468598		ENSBTAG00000013848	528174	adhesion G protein-coupled receptor D1 [Source:VGNC Symbol;Acc:VGNC:53887]	ADGRD1	-1.92241	-1.9272	4.11062	0.000398075	0.00508845
ENSBTAG00000015116	540564	RAD23 homolog A, nucleotide excision repair protein [Source:VGNC Symbol;Acc:VGNC:33682]	RAD23A	-0.993452	7.58118	0.000371622	0.00474197		ENSBTAG00000015642	528783	stromal cell derived factor 4 [Source:VGNC Symbol;Acc:VGNC:34387]	SDF4	-1.12868	-1.12899	6.71598	0.000403086	0.00514604
ENSBTAG00000006916	536067	TATA-box binding protein associated factor 15 [Source:VGNC Symbol;Acc:VGNC:54497]	TAF15	2.82076	1.74741	0.000372251	0.00474197		ENSBTAG00000022114	614243	transmembrane protein 65 [Source:VGNC Symbol;Acc:VGNC:36106]	TMEM65	2.37702	2.41231	1.94461	0.000403655	0.00514686
ENSBTAG00000005104	785213	alpha-1,6-mannosylglycoprotein 6-beta-N-acetylglucosaminyltransferase B [Source:VGNC Symbol;Acc:VGNC:55847]	MGAT5B	-2.59603	1.46317	0.000372367	0.00474197		ENSBTAG00000001244	281407	plasminogen activator, tissue type [Source:VGNC Symbol;Acc:VGNC:32974]	PLAT	-1.13005	-1.13019	7.86886	0.00040582	0.00516798
ENSBTAG00000015778	504467	SAS-6 centriolar assembly protein [Source:VGNC Symbol;Acc:VGNC:34295]	SASS6	1.32636	3.91497	0.000374257	0.00476008		ENSBTAG00000002086	512236	pre-mRNA processing factor 4B [Source:VGNC Symbol;Acc:VGNC:33381]	PRPF4B	1.32672	1.32699	7.18851	0.00040811	0.00519064
ENSBTAG00000008172	535578	egl-9 family hypoxia inducible factor 3 [Source:VGNC Symbol;Acc:VGNC:28367]	EGLN3	-2.52865	2.76829	0.00037697	0.00478648		ENSBTAG00000002335	517952	heart and neural crest derivatives expressed 1 [Source:VGNC Symbol;Acc:VGNC:29746]	HAND1	-8.71937	-1.44269e+08	2.52313	0.000409389	0.00520042
ENSBTAG00000003443	516420	ubiquitin specific peptidase 46 [Source:VGNC Symbol;Acc:VGNC:52847]	USP46	1.08982	5.74463	0.000377273	0.00478648		ENSBTAG00000008172	535578	egl-9 family hypoxia inducible factor 3 [Source:VGNC Symbol;Acc:VGNC:28367]	EGLN3	-2.41064	-2.42572	2.76829	0.000410922	0.00521338
ENSBTAG00000004037	280831	Jun proto-oncogene, AP-1 transcription factor subunit [Source:VGNC Symbol;Acc:VGNC:30386]	JUN	0.990312	9.10047	0.000380671	0.00482357		ENSBTAG00000014217	539542	hematopoietically expressed homeobox [Source:VGNC Symbol;Acc:VGNC:29839]	HHEX	1.96296	1.97777	2.31888	0.000411626	0.0052158
ENSBTAG00000014609	538606	protein phosphatase 1 regulatory subunit 12A [Source:VGNC Symbol;Acc:VGNC:33223]	PPP1R12A	1.06762	7.58048	0.00038138	0.00482655		ENSBTAG00000012694	538770	U2AF homology motif kinase 1 [Source:VGNC Symbol;Acc:VGNC:36653]	UHMK1	2.67478	2.70702	1.93092	0.000413563	0.00523384
ENSBTAG00000005453	505234	FYVE, RhoGEF and PH domain containing 4 [Source:VGNC Symbol;Acc:VGNC:28967]	FGD4	2.06298	2.01896	0.000383158	0.00484302		ENSBTAG00000007362	524274	XPC complex subunit, DNA damage recognition and repair factor [Source:VGNC Symbol;Acc:VGNC:36993]	XPC	-1.14506	-1.14537	6.70163	0.000417041	0.00527129
ENSBTAG00000013621	531435	dpy-19 like 4 [Source:VGNC Symbol;Acc:VGNC:49549]	DPY19L4	1.88066	2.49671	0.00038454	0.00484651		ENSBTAG00000006489	541234	myosin VA [Source:VGNC Symbol;Acc:VGNC:31826]	MYO5A	1.2108	1.21163	5.5313	0.000420162	0.00530415
ENSBTAG00000002767	525962	G protein subunit beta 4 [Source:VGNC Symbol;Acc:VGNC:29461]	GNB4	1.15865	7.04371	0.000384733	0.00484651		ENSBTAG00000004842	538571	ring finger and SPRY domain containing 1 [Source:VGNC Symbol;Acc:VGNC:34191]	RSPRY1	1.34578	1.34936	3.47637	0.000420913	0.00530705
ENSBTAG00000014059	282146	ATPase plasma membrane Ca2+ transporting 4 [Source:VGNC Symbol;Acc:VGNC:97243]	ATP2B4	1.8759	4.84805	0.000384863	0.00484651		ENSBTAG00000013452	516762	aquaporin 9 [Source:VGNC Symbol;Acc:VGNC:26051]	AQP9	1.89549	1.89709	5.23147	0.000422264	0.0053175
ENSBTAG00000014615	513953	solute carrier family 26 member 2 [Source:VGNC Symbol;Acc:VGNC:34777]	SLC26A2	4.05887	0.860877	0.00038779	0.00487733		ENSBTAG00000020837	514453	Rho guanine nucleotide exchange factor 16 [Source:VGNC Symbol;Acc:VGNC:26108]	ARHGEF16	-1.58749	-1.59443	3.00826	0.000424231	0.00533566
ENSBTAG00000006241	282272	mannosidase alpha class 2B member 1 [Source:NCBI gene (formerly Entrezgene);Acc:282272]	MAN2B1	-1.01807	6.748	0.00038836	0.00487813		ENSBTAG00000022989	614841	family with sequence similarity 174 member B [Source:VGNC Symbol;Acc:VGNC:28762]	FAM174B	-3.34549	-3.3969	2.43737	0.000425243	0.00534179
ENSBTAG00000009401	507991	5-methyltetrahydrofolate-homocysteine methyltransferase reductase [Source:VGNC Symbol;Acc:VGNC:58606]	MTRR	3.5444	0.870745	0.000389198	0.00487813		ENSBTAG00000021151	317655	myosin heavy chain 10 [Source:VGNC Symbol;Acc:VGNC:31794]	MYH10	1.91531	1.91548	8.90254	0.000428179	0.00537203
ENSBTAG00000001393	615211	metal response element binding transcription factor 2 [Source:VGNC Symbol;Acc:VGNC:31723]	MTF2	1.12127	4.59957	0.000389292	0.00487813		ENSBTAG00000027789	783720	peptidylprolyl isomerase G [Source:VGNC Symbol;Acc:VGNC:33199]	PPIG	1.03788	1.03799	8.04811	0.000429257	0.00537417
ENSBTAG00000018528	540972	ubiquitin specific peptidase 45 [Source:VGNC Symbol;Acc:VGNC:52846]	USP45	2.49429	1.24383	0.000391423	0.00489881		ENSBTAG00000052658	#N/A	#N/A	#N/A	3.41237	3.50304	1.4412	0.000429406	0.00537417
ENSBTAG00000017118	511911	family with sequence similarity 8 member A1 [Source:VGNC Symbol;Acc:VGNC:28844]	FAM8A1	1.84405	2.58747	0.00039682	0.00496025		ENSBTAG00000048459	506760	calcium regulated heat stable protein 1 [Source:NCBI gene (formerly Entrezgene);Acc:506760]	CARHSP1	-1.20825	-1.20856	6.86303	0.000430057	0.00537419
ENSBTAG00000006434	540340	synaptopodin 2 [Source:VGNC Symbol;Acc:VGNC:35531]	SYNPO2	2.52058	1.69017	0.000399972	0.00499351		ENSBTAG00000016775	513787	solute carrier family 27 member 1 [Source:VGNC Symbol;Acc:VGNC:34785]	SLC27A1	-1.74551	-1.75192	3.56396	0.000430463	0.00537419
ENSBTAG00000011338	100125763	neuronal regeneration related protein [Source:NCBI gene (formerly Entrezgene);Acc:100125763]	NREP	2.50815	3.05373	0.000405443	0.00505562		ENSBTAG00000025809	768306	abhydrolase domain containing 8 [Source:VGNC Symbol;Acc:VGNC:25504]	ABHD8	-1.33937	-1.33968	6.76299	0.000432456	0.00539245
ENSBTAG00000018133	537777	semaphorin 3A [Source:VGNC Symbol;Acc:VGNC:34426]	SEMA3A	1.87499	3.03699	0.000411118	0.00511714		ENSBTAG00000006434	540340	synaptopodin 2 [Source:VGNC Symbol;Acc:VGNC:35531]	SYNPO2	2.92786	3.00276	1.69017	0.000437007	0.00544253
ENSBTAG00000047262	101905591	keratin 42 [Source:VGNC Symbol;Acc:VGNC:50431]	KRT42	-2.38699	3.04162	0.000411383	0.00511714		ENSBTAG00000010303	281839	intercellular adhesion molecule 1 [Source:VGNC Symbol;Acc:VGNC:50197]	ICAM1	-1.52061	-1.52635	2.97404	0.000439886	0.00547169
ENSBTAG00000021766	522921	heparin binding EGF like growth factor [Source:VGNC Symbol;Acc:VGNC:29765]	HBEGF	3.03595	2.38553	0.000412022	0.00511883		ENSBTAG00000016810	512526	pyrroline-5-carboxylate reductase 3 [Source:VGNC Symbol;Acc:VGNC:33587]	PYCR3	-1.06332	-1.06351	7.42676	0.000448893	0.00557456
ENSBTAG00000015638	509038	interleukin 20 receptor subunit alpha [Source:VGNC Symbol;Acc:VGNC:30139]	IL20RA	-2.49553	1.66832	0.000412942	0.00512401		ENSBTAG00000014737	282122	vascular endothelial growth factor C [Source:VGNC Symbol;Acc:VGNC:36785]	VEGFC	2.11317	2.11538	4.99431	0.000449252	0.00557456
ENSBTAG00000021060	508497	FtsJ RNA 2'-O-methyltransferase 3 [Source:VGNC Symbol;Acc:VGNC:29139]	FTSJ3	1.18258	5.73073	0.000415973	0.00515533		ENSBTAG00000004177	507983	tetratricopeptide repeat, ankyrin repeat and coiled-coil containing 1 [Source:VGNC Symbol;Acc:VGNC:35591]	TANC1	1.47895	1.48269	3.84086	0.00045159	0.00559674
ENSBTAG00000021170	511255	oxysterol binding protein like 9 [Source:VGNC Symbol;Acc:VGNC:32467]	OSBPL9	1.5783	3.96656	0.00041888	0.00518505		ENSBTAG00000004216	504592	mitogen-activated protein kinase kinase kinase 2 [Source:VGNC Symbol;Acc:VGNC:31195]	MAP3K2	3.43997	3.61626	0.927012	0.00045425	0.00562287
ENSBTAG00000016046	541186	golgi associated PDZ and coiled-coil motif containing [Source:VGNC Symbol;Acc:VGNC:53793]	GOPC	1.58152	3.73275	0.00042505	0.00525502		ENSBTAG00000002292	535439	SWI/SNF related, matrix associated, actin dependent regulator of chromatin, subfamily a, member 1 [Source:VGNC Symbol;Acc:VGNC:34985]	SMARCA1	1.88574	1.88781	5.13841	0.000455414	0.00562778
ENSBTAG00000013556	506146	unc-13 homolog D [Source:VGNC Symbol;Acc:VGNC:36666]	UNC13D	-1.50113	5.01381	0.000426097	0.00525822		ENSBTAG00000015368	538801	septin 4 [Source:VGNC Symbol;Acc:VGNC:34456]	SEPTIN4	-1.73209	-1.73563	4.03786	0.000455753	0.00562778
ENSBTAG00000004368	541127	nuclear factor of activated T cells 3 [Source:VGNC Symbol;Acc:VGNC:32033]	NFATC3	1.55509	3.87747	0.000426364	0.00525822		ENSBTAG00000013302	533850	R3H domain containing 1 [Source:VGNC Symbol;Acc:VGNC:57358]	R3HDM1	1.58216	1.58481	4.50524	0.000457195	0.00563378
ENSBTAG00000013213	508692	odd-skipped related transciption factor 2 [Source:VGNC Symbol;Acc:VGNC:32477]	OSR2	1.29148	5.32747	0.000426859	0.00525822		ENSBTAG00000003504	525059	glutathione synthetase [Source:VGNC Symbol;Acc:VGNC:29683]	GSS	-1.3057	-1.3069	4.9298	0.000457346	0.00563378
ENSBTAG00000018804	538194	cadherin EGF LAG seven-pass G-type receptor 2 [Source:VGNC Symbol;Acc:VGNC:27170]	CELSR2	-1.72205	3.44245	0.000427946	0.00526524		ENSBTAG00000007763	326577	solute carrier family 1 member 4 [Source:VGNC Symbol;Acc:VGNC:34714]	SLC1A4	1.51761	1.51966	4.69192	0.000459536	0.00564795
ENSBTAG00000015225	614694	nucleoporin 58 [Source:VGNC Symbol;Acc:VGNC:32363]	NUP58	2.3674	1.85209	0.000429539	0.00527699		ENSBTAG00000021592	505061	WRN RecQ like helicase [Source:VGNC Symbol;Acc:VGNC:59444]	WRN	1.26565	1.2677	4.25061	0.000459607	0.00564795
ENSBTAG00000015077	519254	DEAD-box helicase 18 [Source:NCBI gene (formerly Entrezgene);Acc:519254]	0	2.01597	1.79383	0.000429939	0.00527699		ENSBTAG00000020984	537312	Rap guanine nucleotide exchange factor 4 [Source:VGNC Symbol;Acc:VGNC:33725]	RAPGEF4	-1.8331	-1.83824	3.70793	0.000465368	0.00571184
ENSBTAG00000001857	618756	docking protein 4 [Source:VGNC Symbol;Acc:VGNC:28168]	DOK4	-1.15545	5.12031	0.000432628	0.0053036		ENSBTAG00000017540	540918	family with sequence similarity 13 member C [Source:VGNC Symbol;Acc:VGNC:28732]	FAM13C	2.38275	2.39878	2.74276	0.00046703	0.00572534
ENSBTAG00000008134	617701	brain derived neurotrophic factor [Source:VGNC Symbol;Acc:VGNC:26461]	BDNF	1.27444	4.87273	0.000433877	0.00531251		ENSBTAG00000012005	513228	intraflagellar transport 43 [Source:VGNC Symbol;Acc:VGNC:30068]	IFT43	-1.21278	-1.21455	4.5658	0.000467933	0.0057295
ENSBTAG00000049864	101906096	protein phosphatase 1 regulatory subunit 9B [Source:NCBI gene (formerly Entrezgene);Acc:101906096]	PPP1R9B	2.70657	1.46029	0.000441179	0.00539543		ENSBTAG00000001821	505359	proline rich coiled-coil 2C [Source:VGNC Symbol;Acc:VGNC:33406]	PRRC2C	1.18027	1.18035	8.67565	0.000475917	0.00582026
ENSBTAG00000017001	507132	RNA binding motif protein 28 [Source:VGNC Symbol;Acc:VGNC:33796]	RBM28	1.07982	5.65278	0.000441987	0.00539882		ENSBTAG00000027843	768059	transcription elongation factor A like 8 [Source:VGNC Symbol;Acc:VGNC:35683]	TCEAL8	2.51174	2.55371	1.97551	0.0004803	0.00586681
ENSBTAG00000018373	533746	dihydropyrimidinase like 2 [Source:VGNC Symbol;Acc:VGNC:28195]	DPYSL2	1.26582	6.561	0.000445053	0.00542975		ENSBTAG00000012142	514440	RAD18 E3 ubiquitin protein ligase [Source:VGNC Symbol;Acc:VGNC:33679]	RAD18	1.42047	1.42412	3.63822	0.00048502	0.00591736
ENSBTAG00000008320	615408	septin 5 [Source:VGNC Symbol;Acc:VGNC:53921]	SEPTIN5	-1.41643	5.02289	0.000449624	0.00547895		ENSBTAG00000044175	506404	centromere protein K [Source:VGNC Symbol;Acc:VGNC:27179]	CENPK	1.17988	1.18057	5.83732	0.000491427	0.00597294
ENSBTAG00000014921	280826	interleukin 6 [Source:VGNC Symbol;Acc:VGNC:30166]	IL6	2.44413	4.46255	0.000451013	0.0054893		ENSBTAG00000013004	534787	inter-alpha-trypsin inhibitor heavy chain 5 [Source:VGNC Symbol;Acc:VGNC:30337]	ITIH5	-8.26061	-1.44269e+08	2.43788	0.000491546	0.00597294
ENSBTAG00000014792	781335	mitogen-activated protein kinase kinase kinase kinase 5 [Source:VGNC Symbol;Acc:VGNC:31208]	MAP4K5	1.64772	3.24459	0.000452615	0.00549777		ENSBTAG00000016109	507276	dehydrogenase/reductase 12 [Source:VGNC Symbol;Acc:VGNC:28041]	DHRS12	-2.68396	-2.7902	0.869365	0.00049204	0.00597294
ENSBTAG00000004864	512749	centrosomal protein 89 [Source:VGNC Symbol;Acc:VGNC:27218]	CEP89	1.25025	4.6751	0.00045279	0.00549777		ENSBTAG00000005359	534069	transforming growth factor beta 2 [Source:VGNC Symbol;Acc:VGNC:35802]	TGFB2	1.37232	1.37315	5.97763	0.000492268	0.00597294
ENSBTAG00000019164	540513	Rho related BTB domain containing 1 [Source:VGNC Symbol;Acc:VGNC:33945]	RHOBTB1	2.39631	1.67341	0.000456445	0.00553555		ENSBTAG00000016378	515494	LDL receptor related protein 10 [Source:VGNC Symbol;Acc:VGNC:30987]	LRP10	-1.02033	-1.02053	7.16749	0.000492511	0.00597294
ENSBTAG00000030278	613671	EGF like domain multiple 7 [Source:VGNC Symbol;Acc:VGNC:59214]	EGFL7	-1.93673	3.21229	0.000457292	0.00553922		ENSBTAG00000007395	535750	alsin Rho guanine nucleotide exchange factor ALS2 [Source:VGNC Symbol;Acc:VGNC:25851]	ALS2	2.29541	2.33958	1.48584	0.000493161	0.00597371
ENSBTAG00000012423	538091	SUMO specific peptidase 1 [Source:VGNC Symbol;Acc:VGNC:34445]	SENP1	3.20274	0.539405	0.000459065	0.00555408		ENSBTAG00000000644	509251	S100 calcium binding protein A5 [Source:VGNC Symbol;Acc:VGNC:34245]	S100A5	-1.68768	-1.69853	2.22149	0.000494684	0.00598502
ENSBTAG00000017369	788176	MAM domain containing 2 [Source:VGNC Symbol;Acc:VGNC:31157]	MAMDC2	3.33996	0.737434	0.000461079	0.00557183		ENSBTAG00000021880	536925	coenzyme Q8A [Source:VGNC Symbol;Acc:VGNC:27616]	COQ8A	-1.25626	-1.25705	5.88238	0.000497634	0.00600702
ENSBTAG00000032122	517359	CD19 molecule [Source:VGNC Symbol;Acc:VGNC:27007]	CD19	-1.5372	3.4673	0.000463654	0.0055963		ENSBTAG00000027787	#N/A	#N/A	#N/A	1.30982	1.31035	6.20086	0.000497682	0.00600702
ENSBTAG00000000442	281444	retinol binding protein 4 [Source:VGNC Symbol;Acc:VGNC:33815]	RBP4	-1.02887	6.2987	0.000464995	0.00560584		ENSBTAG00000045517	#N/A	#N/A	#N/A	3.06947	3.14542	1.30203	0.000498312	0.0060075
ENSBTAG00000001185	767828	lysine methyltransferase 5B [Source:NCBI gene (formerly Entrezgene);Acc:767828]	KMT5B	1.88659	2.71794	0.000467592	0.00563047		ENSBTAG00000004355	100337359	roundabout guidance receptor 3 [Source:VGNC Symbol;Acc:VGNC:34080]	ROBO3	-1.35369	-1.35632	4.1899	0.000499225	0.00601138
ENSBTAG00000008180	515158	spindle apparatus coiled-coil protein 1 [Source:VGNC Symbol;Acc:VGNC:50114]	SPDL1	1.29656	5.26833	0.000470167	0.00565479		ENSBTAG00000013475	506182	TNF receptor associated factor 3 [Source:VGNC Symbol;Acc:VGNC:36272]	TRAF3	1.28164	1.28287	4.97688	0.000503037	0.00605012
ENSBTAG00000001749	539639	SUMO specific peptidase 2 [Source:VGNC Symbol;Acc:VGNC:34446]	SENP2	1.49848	3.4579	0.000472529	0.00567648		ENSBTAG00000044161	#N/A	#N/A	#N/A	2.43497	2.46623	1.56257	0.000504041	0.00605504
ENSBTAG00000052658	#N/A	#N/A	#N/A	3.50351	1.4412	0.000474597	0.0056946		ENSBTAG00000005614	534788	UDP-glucuronate decarboxylase 1 [Source:VGNC Symbol;Acc:VGNC:36753]	UXS1	1.42485	1.43143	2.8264	0.000506859	0.00607895
ENSBTAG00000009477	790878	pirin [Source:VGNC Symbol;Acc:VGNC:32915]	PIR	-1.64847	2.83833	0.000477848	0.00572686		ENSBTAG00000019040	514347	phospholipase B domain containing 2 [Source:VGNC Symbol;Acc:VGNC:32979]	PLBD2	-1.18641	-1.18679	6.44669	0.000507226	0.00607895
ENSBTAG00000021474	513939	gasdermin D [Source:VGNC Symbol;Acc:VGNC:29675]	GSDMD	-1.77	3.02964	0.000479274	0.00573229		ENSBTAG00000007329	509382	SET domain bifurcated histone lysine methyltransferase 2 [Source:VGNC Symbol;Acc:VGNC:34500]	SETDB2	2.2149	2.24028	1.748	0.000507893	0.00607977
ENSBTAG00000017426	533406	programmed cell death 6 interacting protein [Source:VGNC Symbol;Acc:VGNC:32664]	PDCD6IP	2.32468	2.72439	0.000479428	0.00573229		ENSBTAG00000016584	511294	ribosome production factor 2 homolog [Source:VGNC Symbol;Acc:VGNC:34103]	RPF2	1.3561	1.35711	5.18424	0.000509496	0.0060918
ENSBTAG00000016775	513787	solute carrier family 27 member 1 [Source:VGNC Symbol;Acc:VGNC:34785]	SLC27A1	-1.64985	3.56396	0.000480891	0.00574303		ENSBTAG00000044032	540141	lysine demethylase 2A [Source:VGNC Symbol;Acc:VGNC:56269]	KDM2A	1.19348	1.19407	5.9244	0.000512691	0.0061228
ENSBTAG00000038549	509506	phylloquinone omega-hydroxylase CYP4F2 [Source:NCBI gene (formerly Entrezgene);Acc:509506]	0	-4.31381	0.621129	0.000483053	0.00576209		ENSBTAG00000016038	539484	GRIP and coiled-coil domain containing 2 [Source:VGNC Symbol;Acc:VGNC:29281]	GCC2	1.09265	1.09329	5.65622	0.000516487	0.00616091
ENSBTAG00000016979	100125779	phosphate cytidylyltransferase 1, choline, alpha [Source:VGNC Symbol;Acc:VGNC:32652]	PCYT1A	1.84479	2.04739	0.000489409	0.00583108		ENSBTAG00000020136	404149	calcium/calmodulin dependent serine protein kinase [Source:VGNC Symbol;Acc:VGNC:26776]	CASK	2.39792	2.4118	3.09685	0.000519579	0.00619053
ENSBTAG00000020329	107131178	FAM161 centrosomal protein B [Source:VGNC Symbol;Acc:VGNC:28743]	FAM161B	2.38722	1.4846	0.000490718	0.00583984		ENSBTAG00000010510	512470	DExH-box helicase 29 [Source:VGNC Symbol;Acc:VGNC:28050]	DHX29	0.998697	0.998952	6.78222	0.000539232	0.00641717
ENSBTAG00000013848	528174	adhesion G protein-coupled receptor D1 [Source:VGNC Symbol;Acc:VGNC:53887]	ADGRD1	-1.80963	4.11062	0.000499591	0.00593848		ENSBTAG00000012962	281476	seryl-tRNA synthetase 1 [Source:VGNC Symbol;Acc:VGNC:34291]	SARS1	1.12616	1.12652	6.60575	0.000540187	0.00642103
ENSBTAG00000049002	506667	C1D nuclear receptor corepressor [Source:NCBI gene (formerly Entrezgene);Acc:506667]	C1D	1.22139	4.91294	0.000501202	0.00595068		ENSBTAG00000009665	534358	utrophin [Source:VGNC Symbol;Acc:VGNC:36749]	UTRN	1.51485	1.51753	4.65402	0.000543251	0.00644992
ENSBTAG00000053007	540877	inositol-trisphosphate 3-kinase B [Source:NCBI gene (formerly Entrezgene);Acc:540877]	ITPKB	-2.56944	1.8654	0.000501961	0.00595274		ENSBTAG00000011143	539679	karyopherin subunit alpha 1 [Source:VGNC Symbol;Acc:VGNC:30700]	KPNA1	1.23928	1.24004	5.66127	0.000547737	0.0064956
ENSBTAG00000013270	789903	tetratricopeptide repeat domain 19 [Source:VGNC Symbol;Acc:VGNC:36458]	TTC19	3.05379	1.11701	0.00050594	0.00598371		ENSBTAG00000015196	518186	PHD finger protein 6 [Source:VGNC Symbol;Acc:VGNC:97297]	PHF6	1.34079	1.34298	4.27412	0.000549023	0.00650327
ENSBTAG00000020035	539640	regulator of calcineurin 1 [Source:VGNC Symbol;Acc:VGNC:33820]	RCAN1	-2.11833	3.20125	0.000506113	0.00598371		ENSBTAG00000010123	281004	apolipoprotein E [Source:VGNC Symbol;Acc:VGNC:52178]	APOE	-1.4336	-1.43688	3.69729	0.000549665	0.00650331
ENSBTAG00000023279	541201	NEDD4 binding protein 2 like 2 [Source:VGNC Symbol;Acc:VGNC:53827]	N4BP2L2	1.24175	4.48293	0.000506336	0.00598371		ENSBTAG00000017352	529699	zinc finger CCCH-type containing 11A [Source:NCBI gene (formerly Entrezgene);Acc:529699]	ZC3H11A	1.62522	1.62639	5.54654	0.000551315	0.00651075
ENSBTAG00000025809	768306	abhydrolase domain containing 8 [Source:VGNC Symbol;Acc:VGNC:25504]	ABHD8	-1.33978	6.76299	0.000507518	0.00598397		ENSBTAG00000039121	614435	protein tyrosine phosphatase 4A2 [Source:VGNC Symbol;Acc:VGNC:33524]	PTP4A2	1.08225	1.08232	8.82023	0.000551608	0.00651075
ENSBTAG00000048029	281308	matrix metallopeptidase 1 (interstitial collagenase) [Source:NCBI gene (formerly Entrezgene);Acc:281308]	MMP1	-2.56885	5.0796	0.000507534	0.00598397		ENSBTAG00000018272	535394	arginine-glutamic acid dipeptide repeats [Source:VGNC Symbol;Acc:VGNC:33872]	RERE	2.56017	2.60243	1.6074	0.000552214	0.00651075
ENSBTAG00000023907	508076	collagen type XVIII alpha 1 chain [Source:VGNC Symbol;Acc:VGNC:27559]	COL18A1	-1.78643	4.09321	0.000508485	0.00598823		ENSBTAG00000054647	533764	ribulose-5-phosphate-3-epimerase [Source:NCBI gene (formerly Entrezgene);Acc:533764]	RPE	1.0165	1.01739	5.06275	0.000555273	0.00653923
ENSBTAG00000012962	281476	seryl-tRNA synthetase 1 [Source:VGNC Symbol;Acc:VGNC:34291]	SARS1	1.13167	6.60575	0.000509882	0.00599774		ENSBTAG00000015604	540045	zinc finger protein 385A [Source:VGNC Symbol;Acc:VGNC:37263]	ZNF385A	-1.45151	-1.45404	4.18431	0.000559586	0.00658072
ENSBTAG00000000682	789597	Rap guanine nucleotide exchange factor 6 [Source:NCBI gene (formerly Entrezgene);Acc:789597]	0	1.93735	2.96376	0.000513398	0.00603213		ENSBTAG00000005718	280981	perilipin 2 [Source:VGNC Symbol;Acc:VGNC:33030]	PLIN2	1.95094	1.95601	3.57212	0.000560089	0.00658072
ENSBTAG00000021201	533324	family with sequence similarity 126 member B [Source:VGNC Symbol;Acc:VGNC:28725]	FAM126B	1.9074	3.12916	0.000522109	0.00612644		ENSBTAG00000003581	515928	SET domain containing 7, histone lysine methyltransferase [Source:VGNC Symbol;Acc:VGNC:34497]	SETD7	2.83493	2.88257	1.73287	0.000567017	0.00665443
ENSBTAG00000025477	541246	kinesin family member 3A [Source:VGNC Symbol;Acc:VGNC:30602]	KIF3A	1.07142	5.82618	0.000522629	0.00612644		ENSBTAG00000011656	534228	pre-mRNA processing factor 6 [Source:VGNC Symbol;Acc:VGNC:33382]	PRPF6	1.57374	1.57699	4.03118	0.000568969	0.00666966
ENSBTAG00000015362	540595	bone morphogenetic protein 7 [Source:VGNC Symbol;Acc:VGNC:26522]	BMP7	-1.25631	6.21194	0.000526402	0.00616356		ENSBTAG00000012797	539869	defective in cullin neddylation 1 domain containing 1 [Source:VGNC Symbol;Acc:VGNC:27935]	DCUN1D1	2.42844	2.47359	1.64997	0.00057216	0.00669902
ENSBTAG00000009020	506264	cysteine rich transmembrane BMP regulator 1 [Source:VGNC Symbol;Acc:VGNC:27710]	CRIM1	1.41038	7.92247	0.000529433	0.00619194		ENSBTAG00000020035	539640	regulator of calcineurin 1 [Source:VGNC Symbol;Acc:VGNC:33820]	RCAN1	-2.20239	-2.21436	3.20125	0.000572791	0.00669902
ENSBTAG00000051210	281806	glutathione S-transferase pi 1 [Source:NCBI gene (formerly Entrezgene);Acc:281806]	GSTP1	-1.0433	9.70599	0.000531549	0.00620954		ENSBTAG00000017429	533479	prolyl endopeptidase like [Source:VGNC Symbol;Acc:VGNC:33311]	PREPL	1.91614	1.9329	2.24305	0.000574589	0.00671233
ENSBTAG00000053105	539347	transmembrane protein 263 [Source:NCBI gene (formerly Entrezgene);Acc:539347]	TMEM263	2.49513	2.88429	0.00053269	0.00621574		ENSBTAG00000012067	529859	ectopic P-granules autophagy protein 5 homolog [Source:VGNC Symbol;Acc:VGNC:28531]	EPG5	2.41956	2.46093	1.67909	0.000585464	0.00683153
ENSBTAG00000011043	#N/A	#N/A	#N/A	-2.95469	1.38687	0.000537503	0.00626471		ENSBTAG00000013611	534830	sodium channel and clathrin linker 1 [Source:VGNC Symbol;Acc:VGNC:59362]	SCLT1	1.72809	1.7358	2.99905	0.00058865	0.00686084
ENSBTAG00000027713	613760	LysM domain containing 3 [Source:VGNC Symbol;Acc:VGNC:31114]	LYSMD3	2.33644	2.48797	0.000539179	0.00627706		ENSBTAG00000019807	513668	collagen type XXVII alpha 1 chain [Source:VGNC Symbol;Acc:VGNC:56941]	COL27A1	-1.5561	-1.56024	3.5924	0.000590387	0.00687321
ENSBTAG00000014310	540503	HEAT repeat containing 5B [Source:VGNC Symbol;Acc:VGNC:29795]	HEATR5B	3.61931	0.827669	0.00054313	0.00631583		ENSBTAG00000023947	614488	arginine vasopressin induced 1 [Source:VGNC Symbol;Acc:VGNC:26357]	AVPI1	-1.08849	-1.0887	7.16757	0.000593043	0.00689624
ENSBTAG00000014278	535982	T-box transcription factor 2 [Source:VGNC Symbol;Acc:VGNC:35666]	TBX2	-2.47195	2.09164	0.00054466	0.00632639		ENSBTAG00000021633	517825	thymine DNA glycosylase [Source:VGNC Symbol;Acc:VGNC:35711]	TDG	1.3196	1.32023	5.97331	0.000593732	0.00689638
ENSBTAG00000018229	536348	nuclear factor I X [Source:VGNC Symbol;Acc:VGNC:32042]	NFIX	2.06096	2.37248	0.000545827	0.0063294		ENSBTAG00000020546	353353	tRNA aspartic acid methyltransferase 1 [Source:VGNC Symbol;Acc:VGNC:36296]	TRDMT1	2.15524	2.17794	2.06511	0.000596029	0.00691516
ENSBTAG00000012963	781105	villin like [Source:VGNC Symbol;Acc:VGNC:36795]	VILL	-2.65949	1.46283	0.000546163	0.0063294		ENSBTAG00000018160	506387	laminin subunit alpha 1 [Source:VGNC Symbol;Acc:VGNC:30769]	LAMA1	2.7176	2.73693	2.8736	0.00059951	0.00694584
ENSBTAG00000027506	767873	small nuclear ribonucleoprotein polypeptide B2 [Source:VGNC Symbol;Acc:VGNC:35077]	SNRPB2	0.968069	8.12646	0.000548469	0.00634889		ENSBTAG00000039117	540222	TOG array regulator of axonemal microtubules 1 [Source:VGNC Symbol;Acc:VGNC:36214]	TOGARAM1	1.74566	1.75102	3.46125	0.000600038	0.00694584
ENSBTAG00000050709	112445004	diaphanous related formin 2 [Source:NCBI gene (formerly Entrezgene);Acc:112445004]	0	1.87955	2.23457	0.000551373	0.00637525		ENSBTAG00000025929	782907	methylthioadenosine phosphorylase [Source:NCBI gene (formerly Entrezgene);Acc:782907]	0	1.11238	1.11315	5.41996	0.000601978	0.00696037
ENSBTAG00000027843	768059	transcription elongation factor A like 8 [Source:VGNC Symbol;Acc:VGNC:35683]	TCEAL8	2.20305	1.97551	0.000553716	0.00639508		ENSBTAG00000010451	540272	proliferation-associated 2G4 [Source:VGNC Symbol;Acc:VGNC:82306]	PA2G4	1.12495	1.12498	9.73188	0.000602748	0.00696137
ENSBTAG00000011140	617104	family with sequence similarity 162 member A [Source:VGNC Symbol;Acc:VGNC:28744]	FAM162A	-1.13758	8.09492	0.00055482	0.00640056		ENSBTAG00000012374	789553	mab-21 like 4 [Source:VGNC Symbol;Acc:VGNC:52718]	MAB21L4	-4.51454	-4.9431	0.953252	0.00061878	0.00713842
ENSBTAG00000001471	534489	POC1 centriolar protein A [Source:VGNC Symbol;Acc:VGNC:50094]	POC1A	-1.19601	3.96389	0.000560391	0.00645751		ENSBTAG00000006143	513105	cAMP responsive element binding protein 3 like 1 [Source:VGNC Symbol;Acc:VGNC:27694]	CREB3L1	-1.12334	-1.12344	8.41097	0.000624216	0.00719298
ENSBTAG00000050801	#N/A	0	0	-1.86556	2.93598	0.00056392	0.00649083		ENSBTAG00000001408	539715	cannabinoid receptor interacting protein 1 [Source:VGNC Symbol;Acc:VGNC:27531]	CNRIP1	1.3822	1.38317	5.48469	0.000624941	0.00719318
ENSBTAG00000044427	#N/A	#N/A	#N/A	2.04051	1.49231	0.000570358	0.00655751		ENSBTAG00000017840	509799	bromodomain adjacent to zinc finger domain 2A [Source:VGNC Symbol;Acc:VGNC:26430]	BAZ2A	1.0795	1.07992	6.17909	0.000625949	0.00719665
ENSBTAG00000021656	519751	sperm antigen with calponin homology and coiled-coil domains 1 like [Source:NCBI gene (formerly Entrezgene);Acc:519751]	SPECC1L	3.29915	1.19665	0.000579047	0.00664989		ENSBTAG00000012391	524749	MINDY lysine 48 deubiquitinase 2 [Source:VGNC Symbol;Acc:VGNC:31477]	MINDY2	1.5401	1.54363	3.94083	0.000627853	0.00721039
ENSBTAG00000017851	507554	retinoid X receptor alpha [Source:VGNC Symbol;Acc:VGNC:34230]	RXRA	-1.42303	4.95269	0.000579922	0.00665243		ENSBTAG00000000422	101905039	teashirt zinc finger homeobox 1 [Source:VGNC Symbol;Acc:VGNC:56375]	TSHZ1	-1.39958	-1.4027	4.14996	0.000629637	0.00722273
ENSBTAG00000018749	512320	nudix hydrolase 16 [Source:VGNC Symbol;Acc:VGNC:32330]	NUDT16	-2.05483	3.86975	0.000583915	0.00668529		ENSBTAG00000013270	789903	tetratricopeptide repeat domain 19 [Source:VGNC Symbol;Acc:VGNC:36458]	TTC19	2.47216	2.52209	1.11701	0.000637928	0.0072868
ENSBTAG00000020136	404149	calcium/calmodulin dependent serine protein kinase [Source:VGNC Symbol;Acc:VGNC:26776]	CASK	2.30016	3.09685	0.000584626	0.00668529		ENSBTAG00000049308	782903	growth arrest specific 2 like 3 [Source:NCBI gene (formerly Entrezgene);Acc:782903]	GAS2L3	2.14918	2.17561	1.73295	0.000638173	0.0072868
ENSBTAG00000014922	538275	SH2 domain containing adaptor protein B [Source:VGNC Symbol;Acc:VGNC:34588]	SHB	-1.51759	3.20805	0.000584758	0.00668529		ENSBTAG00000004755	512402	SH3KBP1 binding protein 1 [Source:VGNC Symbol;Acc:VGNC:34602]	SHKBP1	-1.80237	-1.80521	4.40768	0.000638585	0.0072868
ENSBTAG00000006138	512660	semaphorin 3C [Source:VGNC Symbol;Acc:VGNC:34428]	SEMA3C	2.11897	1.93059	0.000585753	0.00668916		ENSBTAG00000001904	513761	zinc finger protein 276 [Source:VGNC Symbol;Acc:VGNC:37236]	ZNF276	3.07809	3.1834	0.842105	0.000638631	0.0072868
ENSBTAG00000009611	510395	PHD finger protein 21A [Source:VGNC Symbol;Acc:VGNC:32821]	PHF21A	2.30582	1.56614	0.000588255	0.0067102		ENSBTAG00000001332	281937	myosin IC [Source:VGNC Symbol;Acc:VGNC:31818]	MYO1C	-1.384	-1.38425	7.34763	0.000638804	0.0072868
ENSBTAG00000012882	510331	cullin 5 [Source:VGNC Symbol;Acc:VGNC:27834]	CUL5	1.40904	3.47608	0.000589954	0.00672204		ENSBTAG00000017375	767842	family with sequence similarity 241 member A [Source:VGNC Symbol;Acc:VGNC:28806]	FAM241A	2.05387	2.06456	2.68776	0.000641642	0.00731098
ENSBTAG00000038794	521172	transmembrane protein 245 [Source:VGNC Symbol;Acc:VGNC:36055]	TMEM245	4.92567	0.983962	0.000592713	0.00674593		ENSBTAG00000033077	#N/A	nuclear FMR1 interacting protein 2 [Source:VGNC Symbol;Acc:VGNC:32346]	NUFIP2	2.40807	2.45751	1.29822	0.000642691	0.00731474
ENSBTAG00000013042	531907	exocyst complex component 5 [Source:VGNC Symbol;Acc:VGNC:28649]	EXOC5	0.985045	5.57372	0.00059373	0.00674995		ENSBTAG00000003610	514134	DENN domain containing 1A [Source:VGNC Symbol;Acc:VGNC:27993]	DENND1A	-2.07564	-2.09539	2.31607	0.000643596	0.00731686
ENSBTAG00000007319	517405	jagged canonical Notch ligand 2 [Source:VGNC Symbol;Acc:VGNC:30362]	JAG2	-1.3231	5.60195	0.000600142	0.00681523		ENSBTAG00000001987	533720	switching B cell complex subunit SWAP70 [Source:VGNC Symbol;Acc:VGNC:54893]	SWAP70	0.972454	0.972655	7.09008	0.00064566	0.00733213
ENSBTAG00000024199	789336	lysine methyltransferase 2C [Source:VGNC Symbol;Acc:VGNC:30692]	KMT2C	1.39034	3.34062	0.00060513	0.00685963		ENSBTAG00000007634	524648	hook microtubule tethering protein 3 [Source:VGNC Symbol;Acc:VGNC:50090]	HOOK3	1.0857	1.08595	6.96004	0.000652082	0.0073968
ENSBTAG00000004901	537790	phosphatidylinositol-4-phosphate 3-kinase catalytic subunit type 2 alpha [Source:NCBI gene (formerly Entrezgene);Acc:537790]	PIK3C2A	1.81141	2.06175	0.0006054	0.00685963		ENSBTAG00000010341	540114	PWWP domain containing 2A [Source:VGNC Symbol;Acc:VGNC:55301]	PWWP2A	1.64369	1.64996	3.17623	0.000654636	0.00741751
ENSBTAG00000004139	531350	BTB domain and CNC homolog 1 [Source:VGNC Symbol;Acc:VGNC:26402]	BACH1	2.58844	2.09126	0.000608432	0.00688631		ENSBTAG00000014615	513953	solute carrier family 26 member 2 [Source:VGNC Symbol;Acc:VGNC:34777]	SLC26A2	3.5796	3.75743	0.860877	0.000664255	0.00751813
ENSBTAG00000002335	517952	heart and neural crest derivatives expressed 1 [Source:VGNC Symbol;Acc:VGNC:29746]	HAND1	-8.49013	2.52313	0.000614422	0.00694638		ENSBTAG00000001898	509840	coiled-coil domain containing 112 [Source:VGNC Symbol;Acc:VGNC:26834]	CCDC112	1.22785	1.22933	4.69826	0.00066933	0.00756499
ENSBTAG00000007602	511976	integrin subunit alpha 8 [Source:VGNC Symbol;Acc:VGNC:30319]	ITGA8	4.35148	0.500091	0.000618433	0.00698397		ENSBTAG00000005102	520774	putative homeodomain transcription factor 2 [Source:VGNC Symbol;Acc:VGNC:32849]	PHTF2	1.89815	1.91958	1.98658	0.000669882	0.00756499
ENSBTAG00000016694	784489	KIAA0319 like [Source:VGNC Symbol;Acc:VGNC:30549]	KIAA0319L	3.06412	0.967789	0.000621508	0.00701092		ENSBTAG00000009141	511554	family with sequence similarity 210 member A [Source:VGNC Symbol;Acc:VGNC:28788]	FAM210A	2.00347	2.03414	1.52485	0.000676223	0.00762812
ENSBTAG00000015325	100139219	mechanistic target of rapamycin kinase [Source:VGNC Symbol;Acc:VGNC:31748]	MTOR	3.37982	1.11109	0.000631809	0.00711922		ENSBTAG00000011601	404164	ST3 beta-galactoside alpha-2,3-sialyltransferase 5 [Source:VGNC Symbol;Acc:VGNC:35334]	ST3GAL5	2.11664	2.13489	2.2031	0.000681854	0.00768313
ENSBTAG00000019197	785666	transcription activation suppressor family member 2 [Source:VGNC Symbol;Acc:VGNC:28784]	TASOR2	2.0148	1.94225	0.000638811	0.00719015		ENSBTAG00000016406	527595	minichromosome maintenance 10 replication initiation factor [Source:VGNC Symbol;Acc:VGNC:31307]	MCM10	1.01244	1.01284	6.15777	0.00068661	0.00772816
ENSBTAG00000012135	515517	La ribonucleoprotein 1B [Source:VGNC Symbol;Acc:VGNC:30791]	LARP1B	1.22212	5.63828	0.000639539	0.0071904		ENSBTAG00000004929	112443003	chromosome 20 C5orf51 homolog [Source:VGNC Symbol;Acc:VGNC:57346]	C20H5orf51	1.49927	1.50506	3.20446	0.00068871	0.00774323
ENSBTAG00000004869	281733	CXADR Ig-like cell adhesion molecule [Source:VGNC Symbol;Acc:VGNC:53521]	CXADR	1.38646	4.48262	0.00065114	0.00731272		ENSBTAG00000049516	777773	ADP ribosylation factor like GTPase 6 interacting protein 1 [Source:NCBI gene (formerly Entrezgene);Acc:777773]	ARL6IP1	1.01387	1.01404	7.46314	0.000693076	0.00778371
ENSBTAG00000002313	281878	inositol 1,4,5-trisphosphate receptor type 2 [Source:VGNC Symbol;Acc:VGNC:30347]	ITPR2	2.73596	0.676995	0.000651856	0.00731272		ENSBTAG00000009190	282359	solute carrier family 2 member 4 [Source:VGNC Symbol;Acc:VGNC:34801]	SLC2A4	-1.94658	-1.96918	1.80751	0.000698165	0.00783222
ENSBTAG00000005877	521399	family with sequence similarity 83 member A [Source:VGNC Symbol;Acc:VGNC:28832]	FAM83A	-1.56744	3.3353	0.000655045	0.0073404		ENSBTAG00000011626	327663	ATPase secretory pathway Ca2+ transporting 1 [Source:VGNC Symbol;Acc:VGNC:26296]	ATP2C1	2.19619	2.21711	2.20788	0.000701788	0.0078642
ENSBTAG00000001644	535163	midasin AAA ATPase 1 [Source:VGNC Symbol;Acc:VGNC:31338]	MDN1	1.43584	4.74111	0.000664464	0.00743556		ENSBTAG00000016703	100139547	cell division cycle 73 [Source:VGNC Symbol;Acc:VGNC:27083]	CDC73	1.21426	1.21592	4.50155	0.000713214	0.00798344
ENSBTAG00000011244	539979	testis associated actin remodelling kinase 2 [Source:VGNC Symbol;Acc:VGNC:35755]	TESK2	1.52282	2.58104	0.000665188	0.00743556		ENSBTAG00000021802	505710	migration and invasion enhancer 1 [Source:VGNC Symbol;Acc:VGNC:31468]	MIEN1	-1.02072	-1.0211	6.31216	0.000718798	0.00803711
ENSBTAG00000031849	510926	transmembrane protein 119 [Source:VGNC Symbol;Acc:VGNC:35955]	TMEM119	-1.59893	2.34641	0.00066573	0.00743556		ENSBTAG00000011962	527631	phospholipase A2 group III [Source:VGNC Symbol;Acc:VGNC:32959]	PLA2G3	-3.39657	-3.43885	2.26716	0.000724082	0.0080873
ENSBTAG00000051836	526041	ankyrin repeat domain protein [Source:NCBI gene (formerly Entrezgene);Acc:526041]	0	2.61482	0.722499	0.000668348	0.00744973		ENSBTAG00000013784	282420	casein kinase 2 alpha 2 [Source:VGNC Symbol;Acc:VGNC:27769]	CSNK2A2	1.23957	1.24013	5.98262	0.000725014	0.00808884
ENSBTAG00000002258	281631	apolipoprotein A1 [Source:VGNC Symbol;Acc:VGNC:26022]	APOA1	-1.07849	7.16235	0.000668462	0.00744973		ENSBTAG00000009607	510504	LARGE xylosyl- and glucuronyltransferase 2 [Source:VGNC Symbol;Acc:VGNC:30789]	LARGE2	-1.96703	-1.9791	2.89812	0.000726535	0.00809692
ENSBTAG00000011173	509420	family with sequence similarity 189 member A2 [Source:VGNC Symbol;Acc:VGNC:54429]	FAM189A2	-2.50775	1.06628	0.000670773	0.00746261		ENSBTAG00000007608	538658	base methyltransferase of 25S rRNA 2 homolog [Source:VGNC Symbol;Acc:VGNC:26528]	BMT2	2.19312	2.21398	2.20348	0.000728006	0.00810445
ENSBTAG00000001821	505359	proline rich coiled-coil 2C [Source:VGNC Symbol;Acc:VGNC:33406]	PRRC2C	1.15274	8.67565	0.000671085	0.00746261		ENSBTAG00000006021	507479	centrosomal protein 250 [Source:VGNC Symbol;Acc:VGNC:27200]	CEP250	2.72621	2.77784	1.51295	0.000728808	0.0081045
ENSBTAG00000020707	534326	adhesion G protein-coupled receptor G6 [Source:VGNC Symbol;Acc:VGNC:25669]	ADGRG6	1.51059	3.64408	0.00067458	0.00749329		ENSBTAG00000009749	522980	ubiquitin specific peptidase 2 [Source:VGNC Symbol;Acc:VGNC:54894]	USP2	3.98814	4.25263	0.723237	0.000729734	0.00810594
ENSBTAG00000008541	493719	microsomal glutathione S-transferase 1 [Source:VGNC Symbol;Acc:VGNC:31451]	MGST1	-2.29619	4.61502	0.000675374	0.00749392		ENSBTAG00000044106	512910	scaffold protein involved in DNA repair [Source:VGNC Symbol;Acc:VGNC:35216]	SPIDR	-1.51976	-1.52582	3.29473	0.000734254	0.00814725
ENSBTAG00000002136	505672	FCH and mu domain containing endocytic adaptor 1 [Source:VGNC Symbol;Acc:VGNC:28935]	FCHO1	-1.61563	5.90456	0.000685709	0.00760032		ENSBTAG00000013346	513676	SIX homeobox 5 [Source:VGNC Symbol;Acc:VGNC:34641]	SIX5	-1.69461	-1.69884	3.87106	0.000737816	0.00817191
ENSBTAG00000007014	521932	centrosomal protein 63 [Source:VGNC Symbol;Acc:VGNC:27209]	CEP63	1.45887	3.05953	0.000689029	0.0076288		ENSBTAG00000046671	100298456	wolframin ER transmembrane glycoprotein [Source:VGNC Symbol;Acc:VGNC:36936]	WFS1	-1.32375	-1.32536	4.60409	0.000738082	0.00817191
ENSBTAG00000018745	282707	centrosomal protein 290 [Source:VGNC Symbol;Acc:VGNC:27201]	CEP290	1.44145	3.10859	0.000690311	0.00763469		ENSBTAG00000048402	#N/A	0	0	1.41808	1.42098	3.97297	0.000740063	0.00818494
ENSBTAG00000009596	614006	chromosome 8 C9orf43 homolog [Source:VGNC Symbol;Acc:VGNC:52741]	C8H9orf43	-1.74187	3.41926	0.000692234	0.00764764		ENSBTAG00000017761	282370	structural maintenance of chromosomes 1A [Source:VGNC Symbol;Acc:VGNC:34997]	SMC1A	1.14233	1.14253	7.47959	0.000743186	0.00821055
ENSBTAG00000044032	540141	lysine demethylase 2A [Source:VGNC Symbol;Acc:VGNC:56269]	KDM2A	1.17259	5.9244	0.000693612	0.00765455		ENSBTAG00000019712	767617	ST14 transmembrane serine protease matriptase [Source:NCBI gene (formerly Entrezgene);Acc:767617]	ST14	-2.09889	-2.1106	2.95326	0.00074505	0.00822221
ENSBTAG00000010460	539563	microtubule affinity regulating kinase 1 [Source:NCBI gene (formerly Entrezgene);Acc:539563]	MARK1	1.46925	3.40172	0.000698872	0.00770425		ENSBTAG00000000750	525740	MSL complex subunit 2 [Source:VGNC Symbol;Acc:VGNC:31699]	MSL2	3.01851	3.12325	1.06237	0.000746155	0.00822549
ENSBTAG00000003581	515928	SET domain containing 7, histone lysine methyltransferase [Source:VGNC Symbol;Acc:VGNC:34497]	SETD7	2.8169	1.73287	0.00070451	0.00775799		ENSBTAG00000006869	511990	PHD finger protein 20 like 1 [Source:VGNC Symbol;Acc:VGNC:32820]	PHF20L1	1.07909	1.07948	6.35055	0.000749356	0.00825183
ENSBTAG00000004849	530939	immunoglobulin superfamily member 3 [Source:VGNC Symbol;Acc:VGNC:30094]	IGSF3	-3.57772	1.46412	0.000706256	0.00776882		ENSBTAG00000026604	615821	LYR motif containing 2 [Source:VGNC Symbol;Acc:VGNC:31109]	LYRM2	1.12362	1.12515	4.50261	0.000751242	0.00826366
ENSBTAG00000009207	539121	lysine methyltransferase 2E (inactive) [Source:VGNC Symbol;Acc:VGNC:30694]	KMT2E	1.01425	6.6439	0.000710255	0.00780437		ENSBTAG00000016990	532257	ubiquitin specific peptidase 24 [Source:VGNC Symbol;Acc:VGNC:36717]	USP24	2.43442	2.4759	1.37993	0.000753845	0.00828334
ENSBTAG00000008504	618415	synaptogyrin 3 [Source:VGNC Symbol;Acc:VGNC:35525]	SYNGR3	-2.69705	2.12756	0.000711927	0.0078143		ENSBTAG00000002136	505672	FCH and mu domain containing endocytic adaptor 1 [Source:VGNC Symbol;Acc:VGNC:28935]	FCHO1	-1.59774	-1.59868	5.90456	0.000779076	0.00855134
ENSBTAG00000054406	787634	chromosome 18 C19orf33 homolog [Source:NCBI gene (formerly Entrezgene);Acc:787634]	C18H19orf33	-0.983217	8.83242	0.000715699	0.00784724		ENSBTAG00000015010	518370	TBC1 domain family member 23 [Source:VGNC Symbol;Acc:VGNC:35638]	TBC1D23	1.91118	1.93623	1.79407	0.000780953	0.00856271
ENSBTAG00000016584	511294	ribosome production factor 2 homolog [Source:VGNC Symbol;Acc:VGNC:34103]	RPF2	1.34985	5.18424	0.00071845	0.00786755		ENSBTAG00000018689	514719	DNA ligase 3 [Source:VGNC Symbol;Acc:VGNC:30883]	LIG3	1.66185	1.6739	2.36554	0.000783714	0.00858374
ENSBTAG00000043584	3283882	ATP synthase F0 subunit 6 [Source:NCBI gene (formerly Entrezgene);Acc:3283882]	ATP6	-1.28941	11.5122	0.000719098	0.00786755		ENSBTAG00000054745	#N/A	0	0	-3.17672	-3.17684	10.5198	0.000785452	0.00859352
ENSBTAG00000018178	618340	nuclear prelamin A recognition factor [Source:VGNC Symbol;Acc:VGNC:55858]	NARF	1.36653	4.66597	0.000736252	0.00804658		ENSBTAG00000000995	540234	terminal nucleotidyltransferase 5A [Source:VGNC Symbol;Acc:VGNC:28815]	TENT5A	1.6408	1.64628	3.0863	0.000786298	0.00859353
ENSBTAG00000004929	112443003	chromosome 20 C5orf51 homolog [Source:VGNC Symbol;Acc:VGNC:57346]	C20H5orf51	1.48955	3.20446	0.000738329	0.00806062		ENSBTAG00000007152	504832	OS9 endoplasmic reticulum lectin [Source:VGNC Symbol;Acc:VGNC:32455]	OS9	2.08535	2.10214	2.49911	0.000789979	0.00862451
ENSBTAG00000014737	282122	vascular endothelial growth factor C [Source:VGNC Symbol;Acc:VGNC:36785]	VEGFC	2.07301	4.99431	0.000739372	0.00806336		ENSBTAG00000004849	530939	immunoglobulin superfamily member 3 [Source:VGNC Symbol;Acc:VGNC:30094]	IGSF3	-3.89584	-4.04973	1.46412	0.000795992	0.00868084
ENSBTAG00000012977	514949	catechol-O-methyltransferase domain containing 1 [Source:VGNC Symbol;Acc:VGNC:27591]	COMTD1	-1.25779	4.00034	0.000746253	0.00812969		ENSBTAG00000015567	528165	translocase of inner mitochondrial membrane 44 [Source:VGNC Symbol;Acc:VGNC:49577]	TIMM44	1.34996	1.35135	4.91997	0.000798869	0.00870288
ENSBTAG00000018126	512144	VPS53 subunit of GARP complex [Source:VGNC Symbol;Acc:VGNC:36829]	VPS53	1.26289	4.87967	0.000748615	0.00814495		ENSBTAG00000007389	510697	interferon induced protein 35 [Source:VGNC Symbol;Acc:VGNC:30044]	IFI35	-1.24553	-1.24828	3.86894	0.000805664	0.00876752
ENSBTAG00000024787	789559	HAUS augmin like complex subunit 3 [Source:VGNC Symbol;Acc:VGNC:29759]	HAUS3	2.16365	2.17084	0.000749256	0.00814495		ENSBTAG00000000197	616544	tRNA methyltransferase 10A [Source:VGNC Symbol;Acc:VGNC:36366]	TRMT10A	1.48348	1.49044	2.73654	0.000808704	0.00879043
ENSBTAG00000023947	614488	arginine vasopressin induced 1 [Source:VGNC Symbol;Acc:VGNC:26357]	AVPI1	-1.07509	7.16757	0.000751215	0.00815754		ENSBTAG00000012168	526705	RAN binding protein 6 [Source:VGNC Symbol;Acc:VGNC:50254]	RANBP6	2.37262	2.42714	1.36867	0.000809705	0.00879043
ENSBTAG00000016038	539484	GRIP and coiled-coil domain containing 2 [Source:VGNC Symbol;Acc:VGNC:29281]	GCC2	1.06991	5.65622	0.000753773	0.00817659		ENSBTAG00000013621	531435	dpy-19 like 4 [Source:VGNC Symbol;Acc:VGNC:49549]	DPY19L4	1.63616	1.64568	2.49671	0.000810361	0.00879043
ENSBTAG00000025964	529061	microtubule associated serine/threonine kinase family member 4 [Source:VGNC Symbol;Acc:VGNC:58387]	MAST4	3.29747	1.20801	0.00076234	0.00826071		ENSBTAG00000017446	786629	E2F transcription factor 8 [Source:VGNC Symbol;Acc:VGNC:28292]	E2F8	1.51141	1.51519	3.83031	0.000812979	0.00880943
ENSBTAG00000010510	512470	DExH-box helicase 29 [Source:VGNC Symbol;Acc:VGNC:28050]	DHX29	0.981368	6.78222	0.000764325	0.00827342		ENSBTAG00000034691	513158	GDP-L-fucose synthase [Source:VGNC Symbol;Acc:VGNC:36450]	GFUS	-1.12959	-1.12995	6.41122	0.000816026	0.00883305
ENSBTAG00000011079	516719	chromosome 18 C19orf48 homolog [Source:NCBI gene (formerly Entrezgene);Acc:516719]	C18H19orf48	1.14358	5.0209	0.000772148	0.00834921		ENSBTAG00000008309	510792	ATPase cation transporting 13A2 [Source:VGNC Symbol;Acc:VGNC:26278]	ATP13A2	-1.48668	-1.49103	3.54056	0.000821561	0.0088764
ENSBTAG00000019868	528153	RUN and FYVE domain containing 1 [Source:NCBI gene (formerly Entrezgene);Acc:528153]	RUFY1	1.34591	3.83324	0.000773608	0.00835611		ENSBTAG00000003183	537455	netrin 4 [Source:VGNC Symbol;Acc:VGNC:32306]	NTN4	1.05826	1.0587	6.28524	0.000821776	0.0088764
ENSBTAG00000014883	327715	GABA type A receptor-associated protein [Source:VGNC Symbol;Acc:VGNC:29185]	GABARAP	-0.962674	7.83213	0.000778083	0.00839554		ENSBTAG00000007089	512533	FSHD region gene 1 [Source:NCBI gene (formerly Entrezgene);Acc:512533]	FRG1	1.00948	1.01005	5.7093	0.000822745	0.00887745
ENSBTAG00000020984	537312	Rap guanine nucleotide exchange factor 4 [Source:VGNC Symbol;Acc:VGNC:33725]	RAPGEF4	-1.73405	3.70793	0.000786128	0.00847336		ENSBTAG00000005763	514859	AKT1 substrate 1 [Source:VGNC Symbol;Acc:VGNC:25798]	AKT1S1	-1.156	-1.157	5.07656	0.000825254	0.00888367
ENSBTAG00000039121	614435	protein tyrosine phosphatase 4A2 [Source:VGNC Symbol;Acc:VGNC:33524]	PTP4A2	1.05789	8.82023	0.000789038	0.00849572		ENSBTAG00000012211	768039	homeobox A5 [Source:VGNC Symbol;Acc:VGNC:29913]	HOXA5	1.21976	1.22138	4.3171	0.00082565	0.00888367
ENSBTAG00000009665	534358	utrophin [Source:VGNC Symbol;Acc:VGNC:36749]	UTRN	1.41343	4.65402	0.000793	0.00852936		ENSBTAG00000038298	512697	coiled-coil domain containing 174 [Source:VGNC Symbol;Acc:VGNC:26871]	CCDC174	1.03402	1.03451	5.83718	0.000825941	0.00888367
ENSBTAG00000017352	529699	zinc finger CCCH-type containing 11A [Source:NCBI gene (formerly Entrezgene);Acc:529699]	ZC3H11A	1.57121	5.54654	0.000797489	0.00856858		ENSBTAG00000018703	#N/A	#N/A	#N/A	4.49989	4.99616	0.799996	0.000829611	0.00891372
ENSBTAG00000009023	522132	transmembrane O-mannosyltransferase targeting cadherins 3 [Source:VGNC Symbol;Acc:VGNC:36147]	TMTC3	1.42608	5.31601	0.000809732	0.00868618		ENSBTAG00000016845	524529	polypeptide N-acetylgalactosaminyltransferase 7 [Source:VGNC Symbol;Acc:VGNC:29235]	GALNT7	2.20176	2.23375	1.82994	0.00083183	0.00892813
ENSBTAG00000000582	512743	lymphocyte antigen 6 complex, locus G6E [Source:NCBI gene (formerly Entrezgene);Acc:512743]	LY6G6E	-1.86724	7.18628	0.000810141	0.00868618		ENSBTAG00000016563	538893	golgin A4 [Source:VGNC Symbol;Acc:VGNC:29485]	GOLGA4	1.03729	1.03748	7.40506	0.000835016	0.00894042
ENSBTAG00000049089	#N/A	0	0	1.85512	2.96497	0.000814687	0.00872542		ENSBTAG00000020852	618274	solute carrier family 16 member 11 [Source:VGNC Symbol;Acc:VGNC:34685]	SLC16A11	-1.26092	-1.26441	3.67759	0.000835479	0.00894042
ENSBTAG00000005261	534348	Fc fragment of IgG binding protein [Source:NCBI gene (formerly Entrezgene);Acc:534348]	0	-1.83409	2.0526	0.000815516	0.00872542		ENSBTAG00000005203	507040	chromosome 1 C3orf33 homolog [Source:VGNC Symbol;Acc:VGNC:52665]	C1H3orf33	1.70592	1.72448	1.86221	0.000835611	0.00894042
ENSBTAG00000054745	#N/A	0	0	-3.15657	10.5198	0.000818562	0.00874881		ENSBTAG00000013460	538545	zinc finger and BTB domain containing 11 [Source:VGNC Symbol;Acc:VGNC:37059]	ZBTB11	2.67643	2.74034	1.09344	0.000842446	0.00900409
ENSBTAG00000008886	535434	storkhead box 2 [Source:VGNC Symbol;Acc:VGNC:35415]	STOX2	3.50651	0.786468	0.000824731	0.00880549		ENSBTAG00000038549	509506	phylloquinone omega-hydroxylase CYP4F2 [Source:NCBI gene (formerly Entrezgene);Acc:509506]	0	-3.55918	-3.78034	0.621129	0.000873173	0.00932192
ENSBTAG00000019704	539633	helicase like transcription factor [Source:VGNC Symbol;Acc:VGNC:50276]	HLTF	1.42684	5.35048	0.000832141	0.0088753		ENSBTAG00000020933	505341	host cell factor C2 [Source:VGNC Symbol;Acc:VGNC:29773]	HCFC2	1.3675	1.37162	3.40169	0.000874876	0.00932192
ENSBTAG00000009607	510504	LARGE xylosyl- and glucuronyltransferase 2 [Source:VGNC Symbol;Acc:VGNC:30789]	LARGE2	-1.83599	2.89812	0.000840159	0.00895143		ENSBTAG00000012922	537728	PHD finger protein 2 [Source:VGNC Symbol;Acc:VGNC:32818]	PHF2	3.17691	3.28312	1.20635	0.000875373	0.00932192
ENSBTAG00000021857	538584	Rho GTPase activating protein 21 [Source:VGNC Symbol;Acc:VGNC:26080]	ARHGAP21	1.39873	6.16016	0.000848352	0.00902688		ENSBTAG00000033217	497019	tropomyosin 3 [Source:VGNC Symbol;Acc:VGNC:36253]	TPM3	0.985062	0.985118	9.01857	0.000875848	0.00932192
ENSBTAG00000026896	529218	forkhead box F2 [Source:VGNC Symbol;Acc:VGNC:29085]	FOXF2	-1.63096	1.84342	0.000849616	0.00902688		ENSBTAG00000047078	506660	neurotrophin 4 [Source:VGNC Symbol;Acc:VGNC:32300]	NTF4	-1.5673	-1.57614	2.86115	0.000881074	0.00936775
ENSBTAG00000013859	782059	SCY1 like pseudokinase 2 [Source:VGNC Symbol;Acc:VGNC:34375]	SCYL2	1.00515	5.35608	0.000849902	0.00902688		ENSBTAG00000018300	768037	TNF receptor superfamily member 19 [Source:VGNC Symbol;Acc:VGNC:53840]	TNFRSF19	-2.854	-2.96229	0.67122	0.000884998	0.00939964
ENSBTAG00000002444	513220	marker of proliferation Ki-67 [Source:VGNC Symbol;Acc:VGNC:55960]	MKI67	1.16629	8.38447	0.000851443	0.00903382		ENSBTAG00000013411	281141	enolase 1 [Source:VGNC Symbol;Acc:VGNC:97268]	ENO1	-1.04267	-1.04268	11.5316	0.000898416	0.00953094
ENSBTAG00000015818	112441463	interstitial collagenase-like [Source:NCBI gene (formerly Entrezgene);Acc:112441463]	0	-2.57761	4.97175	0.000854475	0.00905654		ENSBTAG00000004036	511119	gap junction protein gamma 1 [Source:VGNC Symbol;Acc:VGNC:29382]	GJC1	1.22757	1.22909	4.79712	0.000899234	0.00953094
ENSBTAG00000000197	616544	tRNA methyltransferase 10A [Source:VGNC Symbol;Acc:VGNC:36366]	TRMT10A	1.53318	2.73654	0.000870997	0.00921343		ENSBTAG00000018723	515553	solute carrier family 25 member 34 [Source:VGNC Symbol;Acc:VGNC:34760]	SLC25A34	-2.30322	-2.33486	1.93047	0.000900615	0.00953565
ENSBTAG00000013475	506182	TNF receptor associated factor 3 [Source:VGNC Symbol;Acc:VGNC:36272]	TRAF3	1.23769	4.97688	0.000871193	0.00921343		ENSBTAG00000009960	532573	flotillin 1 [Source:VGNC Symbol;Acc:VGNC:29036]	FLOT1	-1.12203	-1.12295	5.38999	0.000905363	0.00957595
ENSBTAG00000006726	526711	coiled-coil domain containing 102B [Source:VGNC Symbol;Acc:VGNC:56364]	CCDC102B	1.80332	2.39544	0.000871994	0.00921343		ENSBTAG00000021023	529962	zinc finger MYM-type containing 4 [Source:VGNC Symbol;Acc:VGNC:37200]	ZMYM4	1.97811	2.00105	2.2208	0.000918228	0.00970194
ENSBTAG00000015155	100125237	3-hydroxyacyl-CoA dehydratase 3 [Source:VGNC Symbol;Acc:VGNC:29738]	HACD3	1.09648	4.30131	0.000878497	0.00927252		ENSBTAG00000001393	615211	metal response element binding transcription factor 2 [Source:VGNC Symbol;Acc:VGNC:31723]	MTF2	1.05374	1.05505	4.59957	0.000920388	0.00971467
ENSBTAG00000013784	282420	casein kinase 2 alpha 2 [Source:VGNC Symbol;Acc:VGNC:27769]	CSNK2A2	1.23081	5.98262	0.000879463	0.0092731		ENSBTAG00000031579	532412	shugoshin 2 [Source:VGNC Symbol;Acc:VGNC:34546]	SGO2	1.08714	1.08753	6.47482	0.000922609	0.00972803
ENSBTAG00000001968	512635	tetratricopeptide repeat domain 14 [Source:VGNC Symbol;Acc:VGNC:53610]	TTC14	1.04116	6.38248	0.000881406	0.00928396		ENSBTAG00000013769	534360	nectin cell adhesion molecule 3 [Source:NCBI gene (formerly Entrezgene);Acc:534360]	NECTIN3	1.37334	1.37518	4.7585	0.000927255	0.0097592
ENSBTAG00000019275	616784	INTS3 and NABP interacting protein [Source:VGNC Symbol;Acc:VGNC:30204]	INIP	2.52429	2.64162	0.000890364	0.00936861		ENSBTAG00000015559	540516	ERI1 exoribonuclease family member 3 [Source:VGNC Symbol;Acc:VGNC:55169]	ERI3	-1.55071	-1.55575	3.55687	0.000928356	0.0097592
ENSBTAG00000016388	507969	solute carrier organic anion transporter family member 4A1 [Source:VGNC Symbol;Acc:VGNC:34954]	SLCO4A1	-1.74397	2.41707	0.000894077	0.00939797		ENSBTAG00000013412	538523	nuclear factor of activated T cells 5 [Source:VGNC Symbol;Acc:VGNC:32029]	NFAT5	2.17154	2.20815	1.41165	0.000928443	0.0097592
ENSBTAG00000011087	517876	AT-rich interaction domain 2 [Source:VGNC Symbol;Acc:VGNC:26125]	ARID2	1.92666	2.12146	0.000914298	0.0096006		ENSBTAG00000011356	616206	calmodulin regulated spectrin associated protein family member 3 [Source:VGNC Symbol;Acc:VGNC:26731]	CAMSAP3	-3.18435	-3.29599	0.934862	0.000931604	0.00977382
ENSBTAG00000021869	614615	THAP domain containing 5 [Source:VGNC Symbol;Acc:VGNC:35823]	THAP5	1.75784	2.01169	0.00091708	0.00961297		ENSBTAG00000007922	767991	ring finger protein 24 [Source:VGNC Symbol;Acc:VGNC:34059]	RNF24	2.01589	2.04474	1.49786	0.000932287	0.00977382
ENSBTAG00000003504	525059	glutathione synthetase [Source:VGNC Symbol;Acc:VGNC:29683]	GSS	-1.25382	4.9298	0.000917365	0.00961297		ENSBTAG00000018528	540972	ubiquitin specific peptidase 45 [Source:VGNC Symbol;Acc:VGNC:52846]	USP45	2.17348	2.21667	1.24383	0.000932716	0.00977382
ENSBTAG00000017213	510905	microfibril associated protein 1 [Source:VGNC Symbol;Acc:VGNC:31421]	MFAP1	1.04533	6.50966	0.000919939	0.00963002		ENSBTAG00000000090	507880	SEC31 homolog B, COPII coat complex component [Source:VGNC Symbol;Acc:VGNC:34418]	SEC31B	-4.33087	-4.75722	0.870965	0.000935065	0.00978836
ENSBTAG00000021393	539905	fibronectin leucine rich transmembrane protein 2 [Source:VGNC Symbol;Acc:VGNC:29039]	FLRT2	1.50871	3.22682	0.000924349	0.00966226		ENSBTAG00000021607	767961	NADH:ubiquinone oxidoreductase complex assembly factor 2 [Source:VGNC Symbol;Acc:VGNC:31954]	NDUFAF2	1.39138	1.39509	3.5618	0.000939124	0.00982074
ENSBTAG00000003833	511543	solute carrier family 35 member G2 [Source:VGNC Symbol;Acc:VGNC:34837]	SLC35G2	-2.15671	2.24647	0.000926245	0.00966226		ENSBTAG00000016206	281293	monoamine oxidase A [Source:VGNC Symbol;Acc:VGNC:31174]	MAOA	-2.07832	-2.09071	2.68934	0.000940559	0.00982565
ENSBTAG00000050195	617002	family with sequence similarity 172 member A [Source:NCBI gene (formerly Entrezgene);Acc:617002]	FAM172A	1.62701	3.43118	0.00092644	0.00966226		ENSBTAG00000013615	505144	cysteine and histidine rich domain containing 1 [Source:VGNC Symbol;Acc:VGNC:27309]	CHORDC1	0.978854	0.979219	6.21014	0.000946624	0.00987887
ENSBTAG00000031852	513858	TBC1 domain family member 10B [Source:VGNC Symbol;Acc:VGNC:35624]	TBC1D10B	-1.0815	6.31345	0.000926817	0.00966226		ENSBTAG00000012107	538529	solute carrier family 25 member 28 [Source:VGNC Symbol;Acc:VGNC:34754]	SLC25A28	-1.38038	-1.38151	5.17054	0.000950332	0.0099074
ENSBTAG00000018894	506518	peroxisomal biogenesis factor 11 gamma [Source:VGNC Symbol;Acc:VGNC:32753]	PEX11G	-1.00263	5.43376	0.000930416	0.00968985		ENSBTAG00000008068	781454	endoplasmic reticulum lectin 1 [Source:VGNC Symbol;Acc:VGNC:28587]	ERLEC1	0.964222	0.96455	6.40865	0.000957074	0.00996158
ENSBTAG00000048402	#N/A	0	0	1.40304	3.97297	0.000937331	0.00974889		ENSBTAG00000046545	100336730	myocyte enhancer factor 2D [Source:VGNC Symbol;Acc:VGNC:31374]	MEF2D	-1.16371	-1.1648	4.85129	0.000957486	0.00996158
ENSBTAG00000022069	532649	ataxin 2 [Source:VGNC Symbol;Acc:VGNC:26340]	ATXN2	1.18629	5.88542	0.000938001	0.00974889		ENSBTAG00000000040	515219	MAF bZIP transcription factor G [Source:VGNC Symbol;Acc:VGNC:31141]	MAFG	1.01411	1.01469	5.54625	0.000963202	0.0100095
ENSBTAG00000004316	508527	biorientation of chromosomes in cell division 1 like 1 [Source:VGNC Symbol;Acc:VGNC:26537]	BOD1L1	1.12096	7.19553	0.000953356	0.00989836		ENSBTAG00000024162	617307	solute carrier family 19 member 1 [Source:VGNC Symbol;Acc:VGNC:34709]	SLC19A1	-1.23251	-1.23395	4.70049	0.000964057	0.0100095
ENSBTAG00000004427	533350	oxysterol binding protein like 8 [Source:VGNC Symbol;Acc:VGNC:32466]	OSBPL8	1.34698	3.71498	0.000956858	0.0099246		ENSBTAG00000010252	506448	zinc finger protein 397 [Source:NCBI gene (formerly Entrezgene);Acc:506448]	ZNF397	-1.60276	-1.61274	2.60549	0.000966293	0.0100225
ENSBTAG00000014676	615958	shroom family member 1 [Source:VGNC Symbol;Acc:VGNC:34608]	SHROOM1	-1.20876	3.84499	0.000960113	0.00994822		ENSBTAG00000008406	282099	three prime repair exonuclease 1 [Source:VGNC Symbol;Acc:VGNC:36303]	TREX1	-1.06486	-1.06587	4.86021	0.00096858	0.010036
ENSBTAG00000049516	777773	ADP ribosylation factor like GTPase 6 interacting protein 1 [Source:NCBI gene (formerly Entrezgene);Acc:777773]	ARL6IP1	0.993758	7.46314	0.000965224	0.009991		ENSBTAG00000009443	404167	glucosaminyl (N-acetyl) transferase 3, mucin type [Source:NCBI gene (formerly Entrezgene);Acc:404167]	GCNT3	-1.99307	-2.00489	2.75471	0.000969663	0.010037
ENSBTAG00000018314	511672	mediator complex subunit 11 [Source:VGNC Symbol;Acc:VGNC:31348]	MED11	-1.16643	3.67345	0.000970952	0.0100401		ENSBTAG00000014861	518905	solute carrier family 20 member 2 [Source:VGNC Symbol;Acc:VGNC:34718]	SLC20A2	-2.55084	-2.56681	2.60873	0.000974205	0.0100737
ENSBTAG00000017610	510304	nuclear factor related to kappaB binding protein [Source:VGNC Symbol;Acc:VGNC:32051]	NFRKB	1.60086	4.22083	0.000972873	0.0100497		ENSBTAG00000008320	615408	septin 5 [Source:VGNC Symbol;Acc:VGNC:53921]	SEPTIN5	-1.31085	-1.31205	5.02289	0.000976626	0.0100885
ENSBTAG00000021301	768237	acyl-CoA synthetase family member 2 [Source:VGNC Symbol;Acc:VGNC:25562]	ACSF2	-1.09644	5.54925	0.000973884	0.01005		ENSBTAG00000004869	281733	CXADR Ig-like cell adhesion molecule [Source:VGNC Symbol;Acc:VGNC:53521]	CXADR	1.333	1.33496	4.48262	0.000980465	0.0101179
ENSBTAG00000023259	100336844	oxysterol binding protein like 1A [Source:VGNC Symbol;Acc:VGNC:32460]	OSBPL1A	1.73052	2.62687	0.000981274	0.010116		ENSBTAG00000038011	615501	SH3 domain containing ring finger 3 [Source:VGNC Symbol;Acc:VGNC:34581]	SH3RF3	-2.58836	-2.65914	0.819815	0.000991016	0.0102164
ENSBTAG00000049861	783109	Bos taurus BoWC1.1 (WC1), mRNA. [Source:RefSeq mRNA;Acc:NM_001281899]	WC1	2.93356	1.97752	0.000988632	0.0101815		ENSBTAG00000015129	526736	kallikrein related peptidase 10 [Source:VGNC Symbol;Acc:VGNC:30672]	KLK10	-1.15939	-1.16045	5.18856	0.000993238	0.0102289
ENSBTAG00000040512	100126444	Purkinje cell protein 4 like 1 [Source:VGNC Symbol;Acc:VGNC:32645]	PCP4L1	1.88151	3.46908	0.00099371	0.0102235		ENSBTAG00000007014	521932	centrosomal protein 63 [Source:VGNC Symbol;Acc:VGNC:27209]	CEP63	1.42707	1.43345	3.05953	0.000994442	0.010231
ENSBTAG00000016744	535571	cell cycle associated protein 1 [Source:VGNC Symbol;Acc:VGNC:26751]	CAPRIN1	0.974848	6.95519	0.000995199	0.0102284		ENSBTAG00000011505	504785	rabaptin, RAB GTPase binding effector protein 1 [Source:VGNC Symbol;Acc:VGNC:33667]	RABEP1	1.0791	1.07973	5.76894	0.000999934	0.0102771
ENSBTAG00000007362	524274	XPC complex subunit, DNA damage recognition and repair factor [Source:VGNC Symbol;Acc:VGNC:36993]	XPC	-1.08214	6.70163	0.0010016	0.0102839		ENSBTAG00000048508	281867	inhibin subunit beta A [Source:NCBI gene (formerly Entrezgene);Acc:281867]	INHBA	1.80822	1.80851	7.81307	0.0010033	0.0103013
ENSBTAG00000030962	532824	eukaryotic elongation factor, selenocysteine-tRNA specific [Source:VGNC Symbol;Acc:VGNC:28337]	EEFSEC	-1.57915	4.31144	0.00100853	0.0103446		ENSBTAG00000009412	507461	sialic acid acetylesterase [Source:VGNC Symbol;Acc:VGNC:34613]	SIAE	-2.04056	-2.06123	2.0378	0.00100601	0.0103187
ENSBTAG00000017068	512898	DET1 and DDB1 associated 1 [Source:NCBI gene (formerly Entrezgene);Acc:512898]	DDA1	1.44285	2.99081	0.00101706	0.0104216		ENSBTAG00000011482	511955	solute carrier family 43 member 2 [Source:VGNC Symbol;Acc:VGNC:34875]	SLC43A2	-1.25355	-1.25467	5.32875	0.00100858	0.0103338
ENSBTAG00000007329	509382	SET domain bifurcated histone lysine methyltransferase 2 [Source:VGNC Symbol;Acc:VGNC:34500]	SETDB2	2.24744	1.748	0.00102374	0.0104794		ENSBTAG00000015818	112441463	interstitial collagenase-like [Source:NCBI gene (formerly Entrezgene);Acc:112441463]	0	-2.24674	-2.24878	4.97175	0.00100951	0.0103338
ENSBTAG00000012090	281780	alpha-galactosyltransferase 1 (glycoprotein) [Source:NCBI gene (formerly Entrezgene);Acc:281780]	GGTA1	1.21366	5.03091	0.00102749	0.0104971		ENSBTAG00000032517	616240	BAF chromatin remodeling complex subunit BCL7A [Source:VGNC Symbol;Acc:VGNC:53891]	BCL7A	3.05461	3.12115	1.67052	0.00101346	0.0103638
ENSBTAG00000004104	536911	RUNX family transcription factor 2 [Source:VGNC Symbol;Acc:VGNC:34220]	RUNX2	1.77556	2.37894	0.00102769	0.0104971		ENSBTAG00000009125	507093	aldehyde dehydrogenase 1 family member A3 [Source:VGNC Symbol;Acc:VGNC:59168]	ALDH1A3	2.03357	2.06256	1.43062	0.00101965	0.0104103
ENSBTAG00000018349	615930	IFI30 lysosomal thiol reductase [Source:VGNC Symbol;Acc:VGNC:30043]	IFI30	-1.38696	4.75783	0.00102856	0.0104971		ENSBTAG00000024449	533089	centromere protein F [Source:VGNC Symbol;Acc:VGNC:27176]	CENPF	1.01371	1.01381	8.27719	0.00102006	0.0104103
ENSBTAG00000017958	528398	Abelson helper integration site 1 [Source:VGNC Symbol;Acc:VGNC:53780]	AHI1	1.06762	5.08045	0.00103151	0.0105167		ENSBTAG00000017517	535214	zinc finger protein 236 [Source:VGNC Symbol;Acc:VGNC:37231]	ZNF236	2.42064	2.47556	1.37591	0.00102343	0.0104343
ENSBTAG00000006718	532708	nuclear VCP like [Source:VGNC Symbol;Acc:VGNC:32372]	NVL	1.2843	4.51239	0.0010334	0.0105254		ENSBTAG00000019120	540681	WD repeat and HMG-box DNA binding protein 1 [Source:VGNC Symbol;Acc:VGNC:36878]	WDHD1	1.30304	1.30506	4.49039	0.00103138	0.0105048
ENSBTAG00000046335	#N/A	0	0	2.67864	1.42605	0.00104025	0.010581		ENSBTAG00000013479	768005	SLC9A3 regulator 2 [Source:VGNC Symbol;Acc:VGNC:34942]	SLC9A3R2	-1.64341	-1.64847	3.46148	0.0010482	0.0106654
ENSBTAG00000015085	505436	chloride intracellular channel 3 [Source:VGNC Symbol;Acc:VGNC:27441]	CLIC3	-2.12188	2.37366	0.00104094	0.010581		ENSBTAG00000051333	783538	AT-rich interaction domain 5B [Source:VGNC Symbol;Acc:VGNC:26132]	ARID5B	0.987461	0.987622	7.4744	0.00105034	0.0106765
ENSBTAG00000011656	534228	pre-mRNA processing factor 6 [Source:VGNC Symbol;Acc:VGNC:33382]	PRPF6	1.49492	4.03118	0.001046	0.0106218		ENSBTAG00000012725	506904	chromosome 10 C14orf93 homolog [Source:VGNC Symbol;Acc:VGNC:52610]	C10H14orf93	-1.50253	-1.51189	2.54593	0.00105189	0.0106816
ENSBTAG00000020570	#N/A	#N/A	#N/A	3.74023	0.835245	0.00104801	0.0106316		ENSBTAG00000005588	508460	decapping exoribonuclease [Source:VGNC Symbol;Acc:VGNC:50147]	DXO	-1.29271	-1.29671	3.41818	0.00105825	0.0107223
ENSBTAG00000025622	516457	DEF6 guanine nucleotide exchange factor [Source:VGNC Symbol;Acc:VGNC:27986]	DEF6	-7.33684	1.76885	0.00105165	0.0106579		ENSBTAG00000018598	534551	heat shock protein family B (small) member 6 [Source:NCBI gene (formerly Entrezgene);Acc:534551]	HSPB6	-1.52756	-1.52857	5.79616	0.00105833	0.0107223
ENSBTAG00000010718	789713	Ral GEF with PH domain and SH3 binding motif 2 [Source:VGNC Symbol;Acc:VGNC:33705]	RALGPS2	1.31926	3.19306	0.00105385	0.0106618		ENSBTAG00000048390	#N/A	#N/A	#N/A	-2.08634	-2.11672	1.5883	0.00106021	0.0107223
ENSBTAG00000004136	510807	nuclear factor, erythroid 2 like 3 [Source:VGNC Symbol;Acc:VGNC:32037]	NFE2L3	1.44514	3.44448	0.00105413	0.0106618		ENSBTAG00000030499	786565	diaphanous related formin 1 [Source:NCBI gene (formerly Entrezgene);Acc:786565]	0	2.85804	2.8757	3.05938	0.00106023	0.0107223
ENSBTAG00000031569	517052	golgi membrane protein 1 [Source:VGNC Symbol;Acc:VGNC:29491]	GOLM1	1.67138	2.73937	0.0010564	0.0106742		ENSBTAG00000003012	540944	TNF receptor associated factor 1 [Source:VGNC Symbol;Acc:VGNC:36270]	TRAF1	-1.30192	-1.30455	3.90975	0.00106116	0.0107223
ENSBTAG00000008649	538995	ETS variant transcription factor 3 [Source:VGNC Symbol;Acc:VGNC:50176]	ETV3	1.73606	2.75192	0.00106018	0.0107017		ENSBTAG00000038107	788091	MAPK activated protein kinase 2 [Source:VGNC Symbol;Acc:VGNC:54449]	MAPKAPK2	1.90671	1.91427	3.47218	0.00106632	0.0107637
ENSBTAG00000012820	513275	syntaxin 3 [Source:VGNC Symbol;Acc:VGNC:35439]	STX3	-2.73909	1.53573	0.00106223	0.0107118		ENSBTAG00000049002	506667	C1D nuclear receptor corepressor [Source:NCBI gene (formerly Entrezgene);Acc:506667]	C1D	1.13993	1.14102	4.91294	0.00108531	0.0109445
ENSBTAG00000020922	532933	UPF1 RNA helicase and ATPase [Source:VGNC Symbol;Acc:VGNC:36680]	UPF1	1.57376	4.00618	0.00106475	0.0107265		ENSBTAG00000015946	510455	RB binding protein 5, histone lysine methyltransferase complex subunit [Source:VGNC Symbol;Acc:VGNC:50641]	RBBP5	1.63067	1.63765	3.01322	0.00109294	0.0110106
ENSBTAG00000021577	536671	zinc finger FYVE-type containing 16 [Source:VGNC Symbol;Acc:VGNC:37174]	ZFYVE16	1.59001	2.94898	0.00106894	0.0107581		ENSBTAG00000051618	#N/A	#N/A	#N/A	2.37709	2.39692	2.28271	0.00109939	0.0110645
ENSBTAG00000008204	538441	carnosine N-methyltransferase 1 [Source:VGNC Symbol;Acc:VGNC:26771]	CARNMT1	2.01637	2.54041	0.00107774	0.010836		ENSBTAG00000007602	511976	integrin subunit alpha 8 [Source:VGNC Symbol;Acc:VGNC:30319]	ITGA8	3.63387	3.89384	0.500091	0.00110562	0.0111163
ENSBTAG00000000090	507880	SEC31 homolog B, COPII coat complex component [Source:VGNC Symbol;Acc:VGNC:34418]	SEC31B	-3.27479	0.870965	0.00108222	0.0108703		ENSBTAG00000003405	508875	tumor protein p53 inducible protein 3 [Source:VGNC Symbol;Acc:VGNC:36235]	TP53I3	-1.54646	-1.55198	3.43548	0.00111014	0.0111485
ENSBTAG00000044001	524132	LIM domain containing preferred translocation partner in lipoma [Source:NCBI gene (formerly Entrezgene);Acc:524132]	LPP	2.08831	2.85879	0.00108489	0.0108863		ENSBTAG00000009742	524590	docking protein 7 [Source:VGNC Symbol;Acc:VGNC:53703]	DOK7	-1.1003	-1.10184	4.53565	0.00111101	0.0111485
ENSBTAG00000017517	535214	zinc finger protein 236 [Source:VGNC Symbol;Acc:VGNC:37231]	ZNF236	2.25615	1.37591	0.0010881	0.0109078		ENSBTAG00000051419	#N/A	0	0	2.27425	2.30463	1.81514	0.00111275	0.0111549
ENSBTAG00000008078	540154	tripartite motif containing 59 [Source:VGNC Symbol;Acc:VGNC:36344]	TRIM59	2.31393	2.11937	0.00109166	0.0109283		ENSBTAG00000019804	513526	small nuclear ribonucleoprotein U11/U12 subunit 25 [Source:VGNC Symbol;Acc:VGNC:35069]	SNRNP25	-0.88594	-0.886035	7.88128	0.00111399	0.0111564
ENSBTAG00000013411	281141	enolase 1 [Source:VGNC Symbol;Acc:VGNC:97268]	ENO1	-1.02924	11.5316	0.0010924	0.0109283		ENSBTAG00000015325	100139219	mechanistic target of rapamycin kinase [Source:VGNC Symbol;Acc:VGNC:31748]	MTOR	2.94946	3.03666	1.11109	0.00112215	0.0112271
ENSBTAG00000020093	617935	cullin 4A [Source:VGNC Symbol;Acc:VGNC:27832]	CUL4A	1.46414	3.33947	0.00109336	0.0109283		ENSBTAG00000008136	326578	SNW domain containing 1 [Source:VGNC Symbol;Acc:VGNC:35089]	SNW1	0.958971	0.959215	6.76209	0.00115521	0.0115464
ENSBTAG00000015559	540516	ERI1 exoribonuclease family member 3 [Source:VGNC Symbol;Acc:VGNC:55169]	ERI3	-1.49166	3.55687	0.00109544	0.0109355		ENSBTAG00000032617	785057	F-box protein 44 [Source:NCBI gene (formerly Entrezgene);Acc:785057]	FBXO44	-1.70239	-1.71622	2.14783	0.00116025	0.0115854
ENSBTAG00000000517	526872	ankyrin repeat domain 29 [Source:VGNC Symbol;Acc:VGNC:25921]	ANKRD29	-1.11003	3.92446	0.00109624	0.0109355		ENSBTAG00000016764	282869	ubiquitin like modifier activating enzyme 1 [Source:VGNC Symbol;Acc:VGNC:36561]	UBA1	-1.01275	-1.01284	8.27877	0.00116284	0.0115999
ENSBTAG00000012482	540622	CUB domain containing protein 1 [Source:VGNC Symbol;Acc:VGNC:27089]	CDCP1	1.56502	3.49367	0.00110077	0.01097		ENSBTAG00000007559	515119	URI1 prefoldin like chaperone [Source:VGNC Symbol;Acc:VGNC:36698]	URI1	1.07365	1.07442	5.37176	0.00117666	0.0117262
ENSBTAG00000013196	511373	serine/threonine kinase 17b [Source:VGNC Symbol;Acc:VGNC:35388]	STK17B	1.82223	2.5578	0.0011027	0.0109784		ENSBTAG00000003072	282130	acyl-CoA dehydrogenase very long chain [Source:VGNC Symbol;Acc:VGNC:50246]	ACADVL	-0.942342	-0.942506	7.25179	0.00117874	0.0117355
ENSBTAG00000019040	514347	phospholipase B domain containing 2 [Source:VGNC Symbol;Acc:VGNC:32979]	PLBD2	-1.12655	6.44669	0.00111325	0.0110727		ENSBTAG00000018942	534692	SSX family member 2 interacting protein [Source:VGNC Symbol;Acc:VGNC:35329]	SSX2IP	1.32767	1.33021	3.99359	0.00118689	0.0117949
ENSBTAG00000054466	#N/A	0	0	1.86704	1.51695	0.00111939	0.0111228		ENSBTAG00000006197	535814	zinc finger DHHC-type palmitoyltransferase 21 [Source:VGNC Symbol;Acc:VGNC:37137]	ZDHHC21	1.25926	1.26214	3.86845	0.00118703	0.0117949
ENSBTAG00000047661	#N/A	#N/A	#N/A	2.0796	2.18854	0.00112619	0.0111795		ENSBTAG00000055295	#N/A	0	0	-1.66292	-1.67716	2.15668	0.00119049	0.0118178
ENSBTAG00000003399	537503	SWI/SNF related, matrix associated, actin dependent regulator of chromatin, subfamily a, member 5 [Source:VGNC Symbol;Acc:VGNC:34988]	SMARCA5	1.40764	6.96608	0.00112917	0.0111982		ENSBTAG00000020084	504489	LON peptidase N-terminal domain and ring finger 1 [Source:VGNC Symbol;Acc:VGNC:30949]	LONRF1	1.27254	1.27625	3.41553	0.00120297	0.0119301
ENSBTAG00000015839	281295	microtubule associated protein 4 [Source:NCBI gene (formerly Entrezgene);Acc:281295]	MAP4	2.52672	1.77219	0.00113194	0.0112147		ENSBTAG00000015572	613858	YTH domain containing 1 [Source:VGNC Symbol;Acc:VGNC:37039]	YTHDC1	1.05567	1.05599	6.611	0.00120547	0.0119432
ENSBTAG00000034005	782819	zinc finger protein 35 [Source:VGNC Symbol;Acc:VGNC:37255]	ZNF35	1.34005	3.57612	0.00113659	0.0112498		ENSBTAG00000011363	536706	ecotropic viral integration site 5 [Source:VGNC Symbol;Acc:VGNC:55170]	EVI5	1.175	1.17659	4.68528	0.00120919	0.0119684
ENSBTAG00000018300	768037	TNF receptor superfamily member 19 [Source:VGNC Symbol;Acc:VGNC:53840]	TNFRSF19	-3.28626	0.67122	0.00113775	0.0112503		ENSBTAG00000011759	519675	complement C1q like 1 [Source:VGNC Symbol;Acc:VGNC:26620]	C1QL1	-1.15647	-1.15902	3.78186	0.00121063	0.011971
ENSBTAG00000012849	282191	collagen type IV alpha 1 chain [Source:VGNC Symbol;Acc:VGNC:50081]	COL4A1	1.32858	7.36896	0.00114602	0.0113212		ENSBTAG00000016622	515010	T cell activation inhibitor, mitochondrial [Source:VGNC Symbol;Acc:VGNC:35677]	TCAIM	-3.45013	-3.56414	1.40626	0.00121863	0.0120384
ENSBTAG00000007352	540768	potassium voltage-gated channel subfamily C member 4 [Source:VGNC Symbol;Acc:VGNC:30433]	KCNC4	-2.19433	1.85256	0.00115798	0.0114193		ENSBTAG00000022489	509283	E3 ubiquitin-protein ligase RNF213 [Source:NCBI gene (formerly Entrezgene);Acc:509283]	0	2.62784	2.68441	1.47416	0.00122136	0.0120536
ENSBTAG00000048271	532244	microtubule associated monooxygenase, calponin and LIM domain containing 3 [Source:VGNC Symbol;Acc:VGNC:31459]	MICAL3	1.94688	1.8868	0.0011582	0.0114193		ENSBTAG00000032223	504790	component of oligomeric golgi complex 7 [Source:VGNC Symbol;Acc:VGNC:27551]	COG7	-1.1628	-1.16433	4.56536	0.00122866	0.012114
ENSBTAG00000003610	514134	DENN domain containing 1A [Source:VGNC Symbol;Acc:VGNC:27993]	DENND1A	-1.84798	2.31607	0.0011628	0.0114535		ENSBTAG00000005140	535280	neuroblastoma suppressor of tumorigenicity 1 [Source:NCBI gene (formerly Entrezgene);Acc:535280]	0	3.01487	3.14462	0.65751	0.00123736	0.0121879
ENSBTAG00000019302	281020	BCL2 apoptosis regulator [Source:VGNC Symbol;Acc:VGNC:26445]	BCL2	2.98538	0.904599	0.00117098	0.0115229		ENSBTAG00000008504	618415	synaptogyrin 3 [Source:VGNC Symbol;Acc:VGNC:35525]	SYNGR3	-2.49882	-2.52719	2.12756	0.0012389	0.0121913
ENSBTAG00000014088	540550	muscleblind like splicing regulator 3 [Source:VGNC Symbol;Acc:VGNC:31285]	MBNL3	1.53541	2.38314	0.00117649	0.011566		ENSBTAG00000005828	504429	MER proto-oncogene, tyrosine kinase [Source:VGNC Symbol;Acc:VGNC:31391]	MERTK	-2.334	-2.36852	1.66949	0.0012436	0.0122157
ENSBTAG00000038011	615501	SH3 domain containing ring finger 3 [Source:VGNC Symbol;Acc:VGNC:34581]	SH3RF3	-3.28364	0.819815	0.00117828	0.0115724		ENSBTAG00000020860	505123	chromodomain helicase DNA binding protein 1 [Source:VGNC Symbol;Acc:VGNC:27276]	CHD1	1.16404	1.16434	6.87902	0.00124378	0.0122157
ENSBTAG00000010907	767949	protein phosphatase 1 regulatory inhibitor subunit 1A [Source:VGNC Symbol;Acc:VGNC:54472]	PPP1R1A	-1.56304	3.98302	0.00118253	0.0116029		ENSBTAG00000001920	535323	DNA polymerase theta [Source:VGNC Symbol;Acc:VGNC:33130]	POLQ	1.5658	1.57714	2.4125	0.00124957	0.0122607
ENSBTAG00000014038	533114	cyclin dependent kinase like 2 [Source:VGNC Symbol;Acc:VGNC:27139]	CDKL2	1.67033	2.40616	0.00118502	0.0116162		ENSBTAG00000019639	507462	sorting nexin 16 [Source:VGNC Symbol;Acc:VGNC:35096]	SNX16	1.38384	1.38844	3.25067	0.00125216	0.0122743
ENSBTAG00000021880	536925	coenzyme Q8A [Source:VGNC Symbol;Acc:VGNC:27616]	COQ8A	-1.1623	5.88238	0.00119023	0.011656		ENSBTAG00000006114	539598	zinc finger CCHC-type containing 8 [Source:VGNC Symbol;Acc:VGNC:37123]	ZCCHC8	1.35634	1.35831	4.50372	0.00125551	0.0122953
ENSBTAG00000000898	512581	coagulation factor II thrombin receptor like 2 [Source:VGNC Symbol;Acc:VGNC:28685]	F2RL2	-1.37326	6.58107	0.00119538	0.0116902		ENSBTAG00000005236	281665	cholecystokinin B receptor [Source:VGNC Symbol;Acc:VGNC:26942]	CCKBR	-1.15716	-1.15923	3.91389	0.00126082	0.0123354
ENSBTAG00000001933	514460	protein phosphatase 2 phosphatase activator [Source:VGNC Symbol;Acc:VGNC:33526]	PTPA	-1.11282	8.46679	0.00119602	0.0116902		ENSBTAG00000020180	534351	transmembrane p24 trafficking protein 5 [Source:VGNC Symbol;Acc:VGNC:35938]	TMED5	1.39278	1.39857	2.89863	0.00126487	0.0123631
ENSBTAG00000021874	531074	kinesin family member 14 [Source:VGNC Symbol;Acc:VGNC:30583]	KIF14	2.43434	1.15773	0.00119929	0.0117109		ENSBTAG00000000856	512690	F-box and leucine rich repeat protein 6 [Source:VGNC Symbol;Acc:VGNC:53864]	FBXL6	-1.54236	-1.5426	7.7222	0.00126665	0.0123687
ENSBTAG00000030670	510855	pericentrin [Source:VGNC Symbol;Acc:VGNC:32637]	PCNT	1.78926	2.27937	0.00120223	0.0117284		ENSBTAG00000051299	#N/A	0	0	1.24781	1.24971	4.43169	0.00129889	0.0126713
ENSBTAG00000016703	100139547	cell division cycle 73 [Source:VGNC Symbol;Acc:VGNC:27083]	CDC73	1.17194	4.50155	0.00120527	0.0117418		ENSBTAG00000050426	617416	multivesicular body subunit 12B [Source:NCBI gene (formerly Entrezgene);Acc:617416]	MVB12B	-1.56817	-1.57801	2.75707	0.00130365	0.0127056
ENSBTAG00000001408	539715	cannabinoid receptor interacting protein 1 [Source:VGNC Symbol;Acc:VGNC:27531]	CNRIP1	1.31061	5.48469	0.00120591	0.0117418		ENSBTAG00000020173	507329	inositol polyphosphate-5-phosphatase D [Source:VGNC Symbol;Acc:VGNC:30212]	INPP5D	-2.18399	-2.20771	2.17239	0.00130949	0.0127503
ENSBTAG00000011962	527631	phospholipase A2 group III [Source:VGNC Symbol;Acc:VGNC:32959]	PLA2G3	-3.44739	2.26716	0.00121164	0.0117863		ENSBTAG00000018315	787413	proline, glutamate and leucine rich protein 1 [Source:VGNC Symbol;Acc:VGNC:32744]	PELP1	-1.59562	-1.60685	2.3765	0.00131388	0.0127808
ENSBTAG00000047567	282121	vascular endothelial growth factor B [Source:VGNC Symbol;Acc:VGNC:97324]	VEGFB	-1.26604	4.78531	0.00121342	0.0117923		ENSBTAG00000051631	616561	PNKD metallo-beta-lactamase domain containing [Source:NCBI gene (formerly Entrezgene);Acc:616561]	PNKD	-1.35115	-1.35262	4.69585	0.00131888	0.0128172
ENSBTAG00000003319	529416	fibronectin leucine rich transmembrane protein 3 [Source:VGNC Symbol;Acc:VGNC:29040]	FLRT3	1.06994	7.35327	0.00121859	0.0118284		ENSBTAG00000020896	528362	galectin-related inter-fiber protein [Source:VGNC Symbol;Acc:VGNC:29642]	GRIFIN	-2.61117	-2.63993	2.18284	0.00132134	0.0128289
ENSBTAG00000031609	508969	THAP domain containing 12 [Source:VGNC Symbol;Acc:VGNC:35820]	THAP12	2.36489	1.73447	0.00121945	0.0118284		ENSBTAG00000006212	507792	GTF2I repeat domain containing 1 [Source:VGNC Symbol;Acc:VGNC:29700]	GTF2IRD1	-1.91906	-1.94826	1.87572	0.0013312	0.0129123
ENSBTAG00000027425	617478	coiled-coil domain containing 190 [Source:VGNC Symbol;Acc:VGNC:26883]	CCDC190	-2.76412	1.27304	0.00122692	0.0118894		ENSBTAG00000027506	767873	small nuclear ribonucleoprotein polypeptide B2 [Source:VGNC Symbol;Acc:VGNC:35077]	SNRPB2	0.919168	0.91926	8.12646	0.00133838	0.0129626
ENSBTAG00000008048	521363	GC-rich sequence DNA-binding factor 2 [Source:VGNC Symbol;Acc:VGNC:29283]	GCFC2	2.38308	1.06425	0.00123212	0.0119285		ENSBTAG00000019812	512391	MAPK regulated corepressor interacting protein 1 [Source:VGNC Symbol;Acc:VGNC:31322]	MCRIP1	-1.11484	-1.11519	6.67034	0.00134021	0.0129626
ENSBTAG00000019924	338047	DDHD domain containing 1 [Source:VGNC Symbol;Acc:VGNC:27943]	DDHD1	1.28332	3.98773	0.0012346	0.0119411		ENSBTAG00000017033	508651	lipolysis stimulated lipoprotein receptor [Source:VGNC Symbol;Acc:VGNC:31064]	LSR	-1.10032	-1.10097	5.53624	0.00134021	0.0129626
ENSBTAG00000007395	535750	alsin Rho guanine nucleotide exchange factor ALS2 [Source:VGNC Symbol;Acc:VGNC:25851]	ALS2	1.96928	1.48584	0.00123988	0.0119675		ENSBTAG00000001575	100297344	calmodulin 2 [Source:NCBI gene (formerly Entrezgene);Acc:100297344]	CALM2	0.99388	0.993972	8.39004	0.00134718	0.0130177
ENSBTAG00000015303	535171	membrane palmitoylated protein 6 [Source:VGNC Symbol;Acc:VGNC:31585]	MPP6	1.18309	3.96715	0.00124038	0.0119675		ENSBTAG00000047268	782183	WT1 transcription factor [Source:VGNC Symbol;Acc:VGNC:59373]	WT1	2.19206	2.23966	1.48505	0.0013557	0.0130855
ENSBTAG00000016823	527889	casein kinase 1 gamma 1 [Source:VGNC Symbol;Acc:VGNC:50095]	CSNK1G1	1.5958	2.6128	0.00124099	0.0119675		ENSBTAG00000016769	613810	cyclin dependent kinase 16 [Source:VGNC Symbol;Acc:VGNC:27119]	CDK16	-1.18878	-1.1898	5.21007	0.00135678	0.0130855
ENSBTAG00000011798	514787	serine/threonine kinase 38 like [Source:VGNC Symbol;Acc:VGNC:35400]	STK38L	1.37319	3.58313	0.00124203	0.0119675		ENSBTAG00000017140	538580	cellular inhibitor of PP2A [Source:VGNC Symbol;Acc:VGNC:27369]	CIP2A	1.1857	1.18654	5.44151	0.00136939	0.0131947
ENSBTAG00000011146	614242	RAB8B, member RAS oncogene family [Source:VGNC Symbol;Acc:VGNC:33663]	RAB8B	1.13357	4.06654	0.0012461	0.0119953		ENSBTAG00000019044	507837	BAR/IMD domain containing adaptor protein 2 [Source:VGNC Symbol;Acc:VGNC:26412]	BAIAP2	1.32143	1.32274	5.06776	0.00138864	0.0133675
ENSBTAG00000019120	540681	WD repeat and HMG-box DNA binding protein 1 [Source:VGNC Symbol;Acc:VGNC:36878]	WDHD1	1.27269	4.49039	0.00125706	0.0120894		ENSBTAG00000008078	540154	tripartite motif containing 59 [Source:VGNC Symbol;Acc:VGNC:36344]	TRIM59	2.18889	2.21067	2.11937	0.00139679	0.0134332
ENSBTAG00000021681	615857	proline rich 11 [Source:VGNC Symbol;Acc:VGNC:33388]	PRR11	1.3891	3.64192	0.00126524	0.012154		ENSBTAG00000013556	506146	unc-13 homolog D [Source:VGNC Symbol;Acc:VGNC:36666]	UNC13D	-1.36391	-1.3655	5.01381	0.00141024	0.0135498
ENSBTAG00000017745	522155	interleukin 6 signal transducer [Source:VGNC Symbol;Acc:VGNC:30168]	IL6ST	1.12079	5.32433	0.00126665	0.012154		ENSBTAG00000046248	326600	actin related protein 2/3 complex subunit 1B [Source:VGNC Symbol;Acc:VGNC:26164]	ARPC1B	1.53256	1.53731	3.4319	0.00141719	0.0136037
ENSBTAG00000052707	#N/A	0	0	2.26183	2.17371	0.00126736	0.012154		ENSBTAG00000048991	613762	REC114 meiotic recombination protein [Source:NCBI gene (formerly Entrezgene);Acc:613762]	REC114	-4.21941	-4.29943	2.92047	0.00141856	0.013604
ENSBTAG00000050888	768227	DnaJ heat shock protein family (Hsp40) member C24 [Source:VGNC Symbol;Acc:VGNC:54631]	DNAJC24	1.70228	3.21773	0.00127032	0.0121665		ENSBTAG00000043577	3283886	NADH dehydrogenase subunit 4 [Source:NCBI gene (formerly Entrezgene);Acc:3283886]	ND4	-1.0899	-1.08993	10.1721	0.00142408	0.0136441
ENSBTAG00000032774	613941	adipogenesis regulatory factor [Source:VGNC Symbol;Acc:VGNC:25680]	ADIRF	-1.11726	8.53523	0.00127219	0.0121665		ENSBTAG00000046079	#N/A	#N/A	#N/A	1.79695	1.8132	2.10403	0.00142901	0.0136785
ENSBTAG00000008288	533620	ankyrin repeat domain 26 [Source:NCBI gene (formerly Entrezgene);Acc:533620]	ANKRD26	1.10643	4.46384	0.00127225	0.0121665		ENSBTAG00000010976	534869	KN motif and ankyrin repeat domains 1 [Source:VGNC Symbol;Acc:VGNC:56976]	KANK1	2.41763	2.44691	1.98029	0.00144316	0.0138009
ENSBTAG00000026604	615821	LYR motif containing 2 [Source:VGNC Symbol;Acc:VGNC:31109]	LYRM2	1.08628	4.50261	0.00127379	0.0121698		ENSBTAG00000024928	338033	TNF receptor superfamily member 1B [Source:VGNC Symbol;Acc:VGNC:36165]	TNFRSF1B	2.48117	2.52295	1.63645	0.00144896	0.0138433
ENSBTAG00000002082	613548	myristoylated alanine rich protein kinase C substrate [Source:VGNC Symbol;Acc:VGNC:31244]	MARCKS	1.80615	3.11958	0.00127553	0.012175		ENSBTAG00000001283	506005	RIC1 homolog, RAB6A GEF complex partner 1 [Source:VGNC Symbol;Acc:VGNC:33959]	RIC1	2.4847	2.54017	1.1615	0.00145502	0.0138882
ENSBTAG00000009368	617367	Ras related GTP binding C [Source:VGNC Symbol;Acc:VGNC:34160]	RRAGC	1.18995	5.37368	0.00128206	0.0122246		ENSBTAG00000010120	510924	HECT and RLD domain containing E3 ubiquitin protein ligase 3 [Source:VGNC Symbol;Acc:VGNC:50190]	HERC3	-2.03227	-2.05532	2.00977	0.00145881	0.0139114
ENSBTAG00000047613	100336523	HtrA serine peptidase 3 [Source:VGNC Symbol;Acc:VGNC:59337]	HTRA3	-1.44833	5.05962	0.00128314	0.0122246		ENSBTAG00000001899	#N/A	potassium voltage-gated channel subfamily H member 7 [Source:VGNC Symbol;Acc:VGNC:30449]	KCNH7	3.6833	3.8622	0.972383	0.00146098	0.013919
ENSBTAG00000010255	538969	zinc finger protein 24 [Source:VGNC Symbol;Acc:VGNC:37232]	ZNF24	1.14816	5.92875	0.00128556	0.0122362		ENSBTAG00000017919	540891	CCR4-NOT transcription complex subunit 4 [Source:VGNC Symbol;Acc:VGNC:27519]	CNOT4	1.557	1.56898	2.28839	0.00146437	0.0139382
ENSBTAG00000019099	100124521	solute carrier family 25 member 37 [Source:NCBI gene (formerly Entrezgene);Acc:100124521]	SLC25A37	1.99221	1.63996	0.00129142	0.0122806		ENSBTAG00000009806	529698	inversin [Source:VGNC Symbol;Acc:VGNC:30236]	INVS	-1.30346	-1.30941	3.07876	0.00147191	0.0139969
ENSBTAG00000011802	511422	collagen type VI alpha 1 chain [Source:VGNC Symbol;Acc:VGNC:27570]	COL6A1	2.45248	1.8705	0.00129949	0.0123458		ENSBTAG00000016760	510368	LRR binding FLII interacting protein 2 [Source:VGNC Symbol;Acc:VGNC:31035]	LRRFIP2	1.00055	1.00091	6.31876	0.00147657	0.0140281
ENSBTAG00000014553	282148	ATPase H+ transporting V0 subunit d1 [Source:VGNC Symbol;Acc:VGNC:26312]	ATP6V0D1	-1.11091	6.3806	0.00130563	0.0123925		ENSBTAG00000009512	514504	EPS8 like 1 [Source:VGNC Symbol;Acc:VGNC:28556]	EPS8L1	-1.29041	-1.29457	3.477	0.00148332	0.0140791
ENSBTAG00000005144	508493	patatin like phospholipase domain containing 2 [Source:VGNC Symbol;Acc:VGNC:33091]	PNPLA2	-1.19737	5.26899	0.00131717	0.0124904		ENSBTAG00000011011	512652	slingshot protein phosphatase 2 [Source:VGNC Symbol;Acc:VGNC:35313]	SSH2	1.87022	1.89256	1.78036	0.00151117	0.01433
ENSBTAG00000000221	537542	RNA binding motif protein 34 [Source:NCBI gene (formerly Entrezgene);Acc:537542]	RBM34	1.45209	5.30283	0.00132747	0.0125764		ENSBTAG00000040435	#N/A	0	0	-1.06366	-1.06399	6.3584	0.00151258	0.01433
ENSBTAG00000055045	512251	heat shock protein family B (small) member 7 [Source:VGNC Symbol;Acc:VGNC:49068]	HSPB7	-1.40601	3.00207	0.00133616	0.0126469		ENSBTAG00000015802	785086	cAMP responsive element binding protein 3 like 2 [Source:VGNC Symbol;Acc:VGNC:27695]	CREB3L2	1.41028	1.41326	4.20455	0.00151638	0.0143527
ENSBTAG00000003994	282261	insulin like growth factor binding protein 3 [Source:VGNC Symbol;Acc:VGNC:30085]	IGFBP3	-2.10782	4.80913	0.00134283	0.0126812		ENSBTAG00000012423	538091	SUMO specific peptidase 1 [Source:VGNC Symbol;Acc:VGNC:34445]	SENP1	2.88735	3.05575	0.539405	0.00152816	0.0144508
ENSBTAG00000052673	#N/A	0	0	2.42445	1.36745	0.00134332	0.0126812		ENSBTAG00000030182	618906	mitogen-activated protein kinase 11 [Source:VGNC Symbol;Acc:VGNC:31214]	MAPK11	-1.30829	-1.31054	4.12688	0.00153094	0.0144591
ENSBTAG00000020004	510277	zinc finger protein 800 [Source:VGNC Symbol;Acc:VGNC:54518]	ZNF800	1.13996	5.55031	0.00134368	0.0126812		ENSBTAG00000046307	281678	CCAAT enhancer binding protein delta [Source:NCBI gene (formerly Entrezgene);Acc:281678]	CEBPD	-1.14782	-1.1479	8.70415	0.00153188	0.0144591
ENSBTAG00000048707	#N/A	0	0	2.04365	2.206	0.00134477	0.0126812		ENSBTAG00000027017	616756	SIX homeobox 3 [Source:VGNC Symbol;Acc:VGNC:34640]	SIX3	1.38678	1.39326	2.9402	0.00153375	0.0144633
ENSBTAG00000039658	784973	programmed cell death 7 [Source:VGNC Symbol;Acc:VGNC:55131]	PDCD7	1.22374	3.83308	0.00134686	0.0126892		ENSBTAG00000038920	783566	vacuolar protein sorting 13 homolog C [Source:VGNC Symbol;Acc:VGNC:36810]	VPS13C	1.49955	1.50449	3.54765	0.00154477	0.0145537
ENSBTAG00000000892	782472	cyclic GMP-AMP synthase [Source:VGNC Symbol;Acc:VGNC:31271]	CGAS	2.46891	1.03541	0.00134954	0.0127027		ENSBTAG00000013772	784123	serine and arginine repetitive matrix 1 [Source:VGNC Symbol;Acc:VGNC:35294]	SRRM1	1.06999	1.07009	8.18933	0.00155001	0.0145895
ENSBTAG00000007074	511794	zinc finger with KRAB and SCAN domains 8 [Source:NCBI gene (formerly Entrezgene);Acc:511794]	ZKSCAN8	1.88768	2.34399	0.00135386	0.0127315		ENSBTAG00000027279	#N/A	#N/A	#N/A	2.22631	2.27947	1.15348	0.00155421	0.0146156
ENSBTAG00000033268	539762	zinc finger homeobox 4 [Source:VGNC Symbol;Acc:VGNC:37158]	ZFHX4	1.16462	4.69021	0.00135693	0.0127487		ENSBTAG00000016637	506275	WW domain binding protein 4 [Source:VGNC Symbol;Acc:VGNC:36874]	WBP4	1.02989	1.0301	7.1253	0.00155774	0.0146353
ENSBTAG00000002201	784953	nuclear transcription factor, X-box binding like 1 [Source:VGNC Symbol;Acc:VGNC:32054]	NFXL1	1.43807	2.92249	0.00135861	0.0127526		ENSBTAG00000051210	281806	glutathione S-transferase pi 1 [Source:NCBI gene (formerly Entrezgene);Acc:281806]	GSTP1	-0.973722	-0.973754	9.70599	0.00156293	0.0146705
ENSBTAG00000017734	519494	vacuolar protein sorting 13 homolog A [Source:NCBI gene (formerly Entrezgene);Acc:519494]	0	2.20977	1.48755	0.0013681	0.0128211		ENSBTAG00000009737	#N/A	#N/A	#N/A	-2.58051	-2.60448	2.14932	0.00156766	0.0147013
ENSBTAG00000006323	506218	sorting nexin 9 [Source:VGNC Symbol;Acc:VGNC:35115]	SNX9	0.971456	5.29758	0.00136843	0.0128211		ENSBTAG00000020922	532933	UPF1 RNA helicase and ATPase [Source:VGNC Symbol;Acc:VGNC:36680]	UPF1	1.47949	1.48241	4.00618	0.00157005	0.0147102
ENSBTAG00000015802	785086	cAMP responsive element binding protein 3 like 2 [Source:VGNC Symbol;Acc:VGNC:27695]	CREB3L2	1.39493	4.20455	0.00137161	0.0128391		ENSBTAG00000014375	509239	transmembrane and coiled-coil domain family 3 [Source:VGNC Symbol;Acc:VGNC:35927]	TMCC3	-1.23457	-1.23798	3.55145	0.00157204	0.0147153
ENSBTAG00000014969	520750	cartilage intermediate layer protein 2 [Source:VGNC Symbol;Acc:VGNC:27367]	CILP2	-1.44448	2.49403	0.00138546	0.0129569		ENSBTAG00000014088	540550	muscleblind like splicing regulator 3 [Source:VGNC Symbol;Acc:VGNC:31285]	MBNL3	1.47869	1.48884	2.38314	0.00157409	0.0147209
ENSBTAG00000012094	539670	secretory carrier membrane protein 3 [Source:VGNC Symbol;Acc:VGNC:34317]	SCAMP3	-0.953667	7.61376	0.0013944	0.0130285		ENSBTAG00000021201	533324	family with sequence similarity 126 member B [Source:VGNC Symbol;Acc:VGNC:28725]	FAM126B	1.59247	1.59822	3.12916	0.00158221	0.0147679
ENSBTAG00000001899	#N/A	potassium voltage-gated channel subfamily H member 7 [Source:VGNC Symbol;Acc:VGNC:30449]	KCNH7	3.69444	0.972383	0.00140755	0.0131393		ENSBTAG00000003580	523124	pleckstrin and Sec7 domain containing [Source:NCBI gene (formerly Entrezgene);Acc:523124]	PSD	-1.36342	-1.36468	5.23787	0.00158254	0.0147679
ENSBTAG00000013611	534830	sodium channel and clathrin linker 1 [Source:VGNC Symbol;Acc:VGNC:59362]	SCLT1	1.59012	2.99905	0.00141317	0.0131796		ENSBTAG00000038794	521172	transmembrane protein 245 [Source:VGNC Symbol;Acc:VGNC:36055]	TMEM245	3.47591	3.61041	0.983962	0.00158347	0.0147679
ENSBTAG00000007683	614170	DDB1 and CUL4 associated factor 17 [Source:VGNC Symbol;Acc:VGNC:27904]	DCAF17	1.99954	1.69955	0.00141664	0.0131999		ENSBTAG00000019928	510038	aquaporin 11 [Source:VGNC Symbol;Acc:VGNC:26045]	AQP11	1.48156	1.48919	2.94489	0.00158825	0.0147989
ENSBTAG00000047650	539535	neurexophilin 4 [Source:VGNC Symbol;Acc:VGNC:32383]	NXPH4	-1.93621	2.10675	0.00143022	0.0133143		ENSBTAG00000016931	526129	E2F transcription factor 7 [Source:VGNC Symbol;Acc:VGNC:28291]	E2F7	1.6572	1.66658	2.68467	0.00159136	0.0148144
ENSBTAG00000021051	505578	zinc finger HIT-type containing 6 [Source:VGNC Symbol;Acc:VGNC:37361]	ZNHIT6	1.19418	7.00203	0.00143652	0.0133607		ENSBTAG00000031741	783152	zinc finger protein 322 [Source:NCBI gene (formerly Entrezgene);Acc:783152]	ZNF322	2.37115	2.44085	0.769766	0.00159691	0.0148524
ENSBTAG00000014091	782247	Rho guanine nucleotide exchange factor 3 [Source:VGNC Symbol;Acc:VGNC:26115]	ARHGEF3	1.66322	1.91405	0.0014562	0.0135313		ENSBTAG00000006775	100337431	solute carrier family 12 member 7 [Source:VGNC Symbol;Acc:VGNC:34670]	SLC12A7	-1.12929	-1.13091	4.50423	0.00160433	0.0148991
ENSBTAG00000016990	532257	ubiquitin specific peptidase 24 [Source:VGNC Symbol;Acc:VGNC:36717]	USP24	2.46516	1.37993	0.00146104	0.0135639		ENSBTAG00000012752	514403	mitochondrial ribosomal protein L2 [Source:VGNC Symbol;Acc:VGNC:31623]	MRPL2	1.78145	1.79826	2.10155	0.00160486	0.0148991
ENSBTAG00000018945	541209	angiomotin like 1 [Source:VGNC Symbol;Acc:VGNC:25871]	AMOTL1	2.99102	0.517542	0.00148381	0.0137628		ENSBTAG00000007488	#N/A	ZFP90 zinc finger protein [Source:VGNC Symbol;Acc:VGNC:37169]	ZFP90	2.87046	2.95697	0.766376	0.00161186	0.0149504
ENSBTAG00000015946	510455	RB binding protein 5, histone lysine methyltransferase complex subunit [Source:VGNC Symbol;Acc:VGNC:50641]	RBBP5	1.59928	3.01322	0.0014903	0.013802		ENSBTAG00000046648	101903427	carboxypeptidase A4-like [Source:NCBI gene (formerly Entrezgene);Acc:101903427]	CPA4	-2.77271	-2.88004	0.779383	0.00163686	0.0151686
ENSBTAG00000016104	523664	B-TFIID TATA-box binding protein associated factor 1 [Source:VGNC Symbol;Acc:VGNC:55937]	BTAF1	2.04898	1.86086	0.00149075	0.013802		ENSBTAG00000019569	523328	CD151 molecule [Source:VGNC Symbol;Acc:VGNC:53655]	CD151	-1.16081	-1.16091	8.57378	0.00164017	0.0151698
ENSBTAG00000002033	613578	UBX domain protein 2A [Source:VGNC Symbol;Acc:VGNC:36625]	UBXN2A	1.08124	3.91901	0.00151546	0.014018		ENSBTAG00000008134	617701	brain derived neurotrophic factor [Source:VGNC Symbol;Acc:VGNC:26461]	BDNF	1.13777	1.13892	4.87273	0.00164137	0.0151698
ENSBTAG00000012929	537625	centrosomal protein 85 like [Source:VGNC Symbol;Acc:VGNC:27217]	CEP85L	1.3643	3.24674	0.00152676	0.0141066		ENSBTAG00000010185	515581	transcriptional adaptor 2B [Source:NCBI gene (formerly Entrezgene);Acc:515581]	TADA2B	2.09368	2.13619	1.53166	0.00164285	0.0151698
ENSBTAG00000018703	#N/A	#N/A	#N/A	3.2613	0.799996	0.00152781	0.0141066		ENSBTAG00000008285	539092	oxidation resistance 1 [Source:VGNC Symbol;Acc:VGNC:55069]	OXR1	2.28861	2.30983	2.45334	0.00164296	0.0151698
ENSBTAG00000049289	#N/A	0	0	-2.32288	1.8998	0.00153157	0.0141285		ENSBTAG00000025964	529061	microtubule associated serine/threonine kinase family member 4 [Source:VGNC Symbol;Acc:VGNC:58387]	MAST4	2.22067	2.25502	1.20801	0.00164877	0.0152097
ENSBTAG00000001100	508044	interleukin 22 receptor subunit alpha 1 [Source:VGNC Symbol;Acc:VGNC:30144]	IL22RA1	-1.82837	1.84689	0.0015345	0.0141427		ENSBTAG00000008321	515933	ring finger protein 8 [Source:VGNC Symbol;Acc:VGNC:34073]	RNF8	2.32046	2.34285	2.13875	0.00165677	0.0152696
ENSBTAG00000015375	515820	SH2 domain containing 3C [Source:VGNC Symbol;Acc:VGNC:34559]	SH2D3C	-1.77962	1.57819	0.0015408	0.0141879		ENSBTAG00000019090	541100	pleckstrin homology, MyTH4 and FERM domain containing H3 [Source:VGNC Symbol;Acc:VGNC:33022]	PLEKHH3	-1.35045	-1.35273	4.29637	0.00166305	0.0153136
ENSBTAG00000046503	541071	nuclear receptor coactivator 7 [Source:NCBI gene (formerly Entrezgene);Acc:541071]	NCOA7	1.2914	3.71064	0.00155042	0.0142636		ENSBTAG00000009617	282356	solute carrier family 2 member 1 [Source:VGNC Symbol;Acc:VGNC:34796]	SLC2A1	-1.15179	-1.15322	4.59044	0.00166633	0.01533
ENSBTAG00000003692	281562	uncoupling protein 2 [Source:VGNC Symbol;Acc:VGNC:36641]	UCP2	-1.30288	5.20608	0.00155381	0.0142818		ENSBTAG00000014248	508556	MIER family member 3 [Source:VGNC Symbol;Acc:VGNC:31471]	MIER3	1.72276	1.74141	2.09292	0.0016771	0.0154151
ENSBTAG00000018636	530744	cyclin K [Source:VGNC Symbol;Acc:VGNC:26974]	CCNK	1.02136	6.69779	0.00156662	0.0143866		ENSBTAG00000022777	538392	CDC42 binding protein kinase alpha [Source:VGNC Symbol;Acc:VGNC:27069]	CDC42BPA	1.11607	1.11761	4.61815	0.00168164	0.0154429
ENSBTAG00000038321	286879	lipase E, hormone sensitive type [Source:VGNC Symbol;Acc:VGNC:55060]	LIPE	-1.76213	2.02513	0.00158216	0.0145162		ENSBTAG00000000742	538514	angiomotin like 2 [Source:VGNC Symbol;Acc:VGNC:25872]	AMOTL2	1.07235	1.07255	7.4931	0.0016836	0.0154469
ENSBTAG00000016588	508215	post-glycosylphosphatidylinositol attachment to proteins 6 [Source:VGNC Symbol;Acc:VGNC:36123]	PGAP6	-1.07665	4.47207	0.00158675	0.0145452		ENSBTAG00000018000	504799	CLN3 lysosomal/endosomal transmembrane protein, battenin [Source:NCBI gene (formerly Entrezgene);Acc:504799]	CLN3	-1.16932	-1.17294	3.44262	0.00169641	0.0155504
ENSBTAG00000019665	281860	interleukin 1 receptor antagonist [Source:VGNC Symbol;Acc:VGNC:30136]	IL1RN	-1.21367	3.76313	0.00159046	0.0145642		ENSBTAG00000021057	504932	transmembrane protein 190 [Source:VGNC Symbol;Acc:VGNC:36016]	TMEM190	-2.81238	-2.84639	2.00264	0.00170215	0.015589
ENSBTAG00000007867	510814	signal transducer and activator of transcription 1 [Source:VGNC Symbol;Acc:VGNC:56151]	STAT1	2.34684	1.5307	0.00159168	0.0145642		ENSBTAG00000006958	538804	chromosome 23 C6orf136 homolog [Source:VGNC Symbol;Acc:VGNC:53961]	C23H6orf136	-1.07795	-1.07835	6.25416	0.00170816	0.01563
ENSBTAG00000023600	613972	apolipoprotein D [Source:VGNC Symbol;Acc:VGNC:26031]	APOD	-1.8017	3.43363	0.00159579	0.0145886		ENSBTAG00000035230	782450	torsin 1A interacting protein 2 [Source:VGNC Symbol;Acc:VGNC:36225]	TOR1AIP2	1.23854	1.24018	4.49374	0.00171055	0.0156378
ENSBTAG00000044074	519864	MLLT10 histone lysine methyltransferase DOT1L cofactor [Source:VGNC Symbol;Acc:VGNC:58389]	MLLT10	1.15905	3.64179	0.00163595	0.014937		ENSBTAG00000038141	509703	adhesion G protein-coupled receptor G1 [Source:VGNC Symbol;Acc:VGNC:97236]	ADGRG1	-1.07075	-1.07096	7.12387	0.00171316	0.0156476
ENSBTAG00000019812	512391	MAPK regulated corepressor interacting protein 1 [Source:VGNC Symbol;Acc:VGNC:31322]	MCRIP1	-1.09721	6.67034	0.00163683	0.014937		ENSBTAG00000043970	614744	chromosome 14 C8orf37 homolog [Source:VGNC Symbol;Acc:VGNC:52626]	C14H8orf37	2.52452	2.57483	1.23376	0.00171656	0.0156555
ENSBTAG00000020860	505123	chromodomain helicase DNA binding protein 1 [Source:VGNC Symbol;Acc:VGNC:27276]	CHD1	1.14072	6.87902	0.00164038	0.014946		ENSBTAG00000039172	519260	RAB GTPase activating protein 1 [Source:NCBI gene (formerly Entrezgene);Acc:519260]	RABGAP1	1.75628	1.7666	2.8278	0.0017171	0.0156555
ENSBTAG00000008102	100139581	cartilage acidic protein 1 [Source:VGNC Symbol;Acc:VGNC:27725]	CRTAC1	-1.2988	3.67342	0.00164075	0.014946		ENSBTAG00000009115	512922	splA/ryanodine receptor domain and SOCS box containing 4 [Source:VGNC Symbol;Acc:VGNC:35249]	SPSB4	-4.43285	-4.86042	1.14256	0.00172601	0.0157226
ENSBTAG00000003300	281913	milk fat globule EGF and factor V/VIII domain containing [Source:VGNC Symbol;Acc:VGNC:31426]	MFGE8	-0.995448	5.54578	0.00164359	0.0149486		ENSBTAG00000000715	#N/A	#N/A	#N/A	2.25763	2.28315	1.8519	0.00173398	0.015781
ENSBTAG00000016845	524529	polypeptide N-acetylgalactosaminyltransferase 7 [Source:VGNC Symbol;Acc:VGNC:29235]	GALNT7	1.92438	1.82994	0.00164397	0.0149486		ENSBTAG00000025210	508632	collagen type IV alpha 2 chain [Source:VGNC Symbol;Acc:VGNC:50082]	COL4A2	2.32075	2.38139	1.60215	0.00174269	0.0158462
ENSBTAG00000003580	523124	pleckstrin and Sec7 domain containing [Source:NCBI gene (formerly Entrezgene);Acc:523124]	PSD	-1.34771	5.23787	0.00164829	0.0149744		ENSBTAG00000019845	100140210	ubiquitin specific peptidase 30 [Source:VGNC Symbol;Acc:VGNC:53928]	USP30	1.3849	1.39043	3.10477	0.00174751	0.0158759
ENSBTAG00000015124	540543	arginine and glutamate rich 1 [Source:VGNC Symbol;Acc:VGNC:26072]	ARGLU1	0.97583	7.48633	0.00167778	0.0152288		ENSBTAG00000018349	615930	IFI30 lysosomal thiol reductase [Source:VGNC Symbol;Acc:VGNC:30043]	IFI30	-1.29444	-1.29581	4.75783	0.00175729	0.0159504
ENSBTAG00000017466	785689	hyperpolarization activated cyclic nucleotide gated potassium channel 4 [Source:VGNC Symbol;Acc:VGNC:29779]	HCN4	-2.22164	1.90171	0.0016818	0.0152403		ENSBTAG00000032253	784245	RAD54 like 2 [Source:VGNC Symbol;Acc:VGNC:49152]	RAD54L2	2.91214	2.98691	1.41655	0.00178403	0.0161787
ENSBTAG00000003526	520207	spectrin repeat containing nuclear envelope family member 3 [Source:VGNC Symbol;Acc:VGNC:35522]	SYNE3	-1.15884	4.21735	0.00168205	0.0152403		ENSBTAG00000017956	512578	potassium channel tetramerization domain containing 15 [Source:VGNC Symbol;Acc:VGNC:30504]	KCTD15	1.76661	1.78472	1.91142	0.00179014	0.0162197
ENSBTAG00000007942	789894	terminal nucleotidyltransferase 4B [Source:VGNC Symbol;Acc:VGNC:54565]	TENT4B	1.8685	1.34677	0.00168929	0.0152923		ENSBTAG00000032982	519474	telomeric repeat binding factor 1 [Source:VGNC Symbol;Acc:VGNC:35749]	TERF1	1.09092	1.09138	6.02875	0.00179278	0.0162213
ENSBTAG00000018082	614254	quinolinate phosphoribosyltransferase [Source:NCBI gene (formerly Entrezgene);Acc:614254]	QPRT	-1.07769	5.61634	0.00169258	0.0153085		ENSBTAG00000017554	506626	reticulon 4 interacting protein 1 [Source:VGNC Symbol;Acc:VGNC:34205]	RTN4IP1	-1.03	-1.03076	5.07265	0.00179351	0.0162213
ENSBTAG00000010106	540547	cyclin D3 [Source:VGNC Symbol;Acc:VGNC:26964]	CCND3	-1.09863	5.83521	0.00169433	0.0153107		ENSBTAG00000005536	282462	male-enhanced antigen 1 [Source:NCBI gene (formerly Entrezgene);Acc:282462]	MEA1	-0.983009	-0.983402	6.17287	0.00179774	0.0162451
ENSBTAG00000017429	533479	prolyl endopeptidase like [Source:VGNC Symbol;Acc:VGNC:33311]	PREPL	1.66359	2.24305	0.00170041	0.015352		ENSBTAG00000019924	338047	DDHD domain containing 1 [Source:VGNC Symbol;Acc:VGNC:27943]	DDHD1	1.22469	1.22704	3.98773	0.00179999	0.016251
ENSBTAG00000046307	281678	CCAAT enhancer binding protein delta [Source:NCBI gene (formerly Entrezgene);Acc:281678]	CEBPD	-1.13861	8.70415	0.00170476	0.0153776		ENSBTAG00000005196	519731	tRNA-yW synthesizing protein 3 homolog [Source:VGNC Symbol;Acc:VGNC:36554]	TYW3	1.55638	1.5632	2.94604	0.0018082	0.0163107
ENSBTAG00000001403	528478	protein kinase C iota [Source:VGNC Symbol;Acc:VGNC:33333]	PRKCI	0.993736	6.85178	0.00170685	0.0153828		ENSBTAG00000014289	613428	zinc finger FYVE-type containing 9 [Source:VGNC Symbol;Acc:VGNC:37179]	ZFYVE9	1.35315	1.36011	2.81267	0.00181119	0.0163232
ENSBTAG00000020311	505839	ubiquitin specific peptidase 20 [Source:VGNC Symbol;Acc:VGNC:36715]	USP20	-1.28859	3.76736	0.00174039	0.0156712		ENSBTAG00000000476	538672	thrombopoietin [Source:VGNC Symbol;Acc:VGNC:35844]	THPO	-1.70129	-1.71052	2.90371	0.00183107	0.0164877
ENSBTAG00000008142	535490	interferon induced with helicase C domain 1 [Source:VGNC Symbol;Acc:VGNC:30048]	IFIH1	2.88089	1.56528	0.00174205	0.0156723		ENSBTAG00000006501	785711	DDB1 and CUL4 associated factor 1 [Source:VGNC Symbol;Acc:VGNC:27899]	DCAF1	1.99309	2.0173	1.6698	0.00183679	0.0165246
ENSBTAG00000030499	786565	diaphanous related formin 1 [Source:NCBI gene (formerly Entrezgene);Acc:786565]	0	2.70507	3.05938	0.00174815	0.015705		ENSBTAG00000014059	282146	ATPase plasma membrane Ca2+ transporting 4 [Source:VGNC Symbol;Acc:VGNC:97243]	ATP2B4	1.56222	1.56418	4.84805	0.00183906	0.0165304
ENSBTAG00000022808	100337346	CDK2 associated cullin domain 1 [Source:VGNC Symbol;Acc:VGNC:55940]	CACUL1	3.24582	1.25172	0.00174878	0.015705		ENSBTAG00000031849	510926	transmembrane protein 119 [Source:VGNC Symbol;Acc:VGNC:35955]	TMEM119	-1.50811	-1.52108	2.34641	0.00184537	0.0165725
ENSBTAG00000016455	536020	cache domain containing 1 [Source:VGNC Symbol;Acc:VGNC:26671]	CACHD1	-1.72342	2.36666	0.00175824	0.0157761		ENSBTAG00000050108	#N/A	0	0	1.50073	1.5063	3.00662	0.0018485	0.016586
ENSBTAG00000000322	533188	CD2 associated protein [Source:VGNC Symbol;Acc:VGNC:27022]	CD2AP	0.992168	6.03438	0.00177927	0.0159387		ENSBTAG00000012047	525246	Janus kinase 2 [Source:VGNC Symbol;Acc:VGNC:30365]	JAK2	1.70563	1.71945	2.3874	0.00185266	0.0166086
ENSBTAG00000016147	505789	centrin 4 [Source:NCBI gene (formerly Entrezgene);Acc:505789]	CETN4	0.922694	7.52385	0.00178212	0.0159387		ENSBTAG00000025612	515890	ubiquitin related modifier 1 [Source:VGNC Symbol;Acc:VGNC:36699]	URM1	-1.02499	-1.02612	4.80617	0.00186673	0.01672
ENSBTAG00000012818	503621	PDZ and LIM domain 5 [Source:VGNC Symbol;Acc:VGNC:32711]	PDLIM5	1.56954	3.11064	0.00178219	0.0159387		ENSBTAG00000002843	511431	acyl-CoA thioesterase 4 [Source:NCBI gene (formerly Entrezgene);Acc:511431]	ACOT4	-1.9503	-1.96457	2.57891	0.00190339	0.017016
ENSBTAG00000002646	526329	dynein cytoplasmic 1 intermediate chain 2 [Source:VGNC Symbol;Acc:VGNC:28271]	DYNC1I2	0.891563	8.11916	0.00178263	0.0159387		ENSBTAG00000003784	507897	DnaJ heat shock protein family (Hsp40) member C2 [Source:VGNC Symbol;Acc:VGNC:53636]	DNAJC2	1.12899	1.12927	6.87132	0.00190349	0.017016
ENSBTAG00000004216	504592	mitogen-activated protein kinase kinase kinase 2 [Source:VGNC Symbol;Acc:VGNC:31195]	MAP3K2	2.51527	0.927012	0.00178771	0.0159701		ENSBTAG00000043558	3283877	NADH dehydrogenase subunit 1 [Source:NCBI gene (formerly Entrezgene);Acc:3283877]	ND1	-1.20314	-1.20315	12.2539	0.00190479	0.017016
ENSBTAG00000046648	101903427	carboxypeptidase A4-like [Source:NCBI gene (formerly Entrezgene);Acc:101903427]	CPA4	-2.77875	0.779383	0.00179805	0.0160484		ENSBTAG00000016525	535951	integrin subunit alpha 1 [Source:VGNC Symbol;Acc:VGNC:30310]	ITGA1	1.21829	1.22003	4.55056	0.00190719	0.0170225
ENSBTAG00000005861	407194	cyclin T1 [Source:VGNC Symbol;Acc:VGNC:26978]	CCNT1	2.30928	1.75085	0.00180621	0.0160948		ENSBTAG00000019983	100140419	ASXL transcriptional regulator 2 [Source:VGNC Symbol;Acc:VGNC:26229]	ASXL2	1.72756	1.73918	2.38446	0.00190979	0.0170307
ENSBTAG00000000737	782535	Dmx like 2 [Source:VGNC Symbol;Acc:VGNC:55110]	DMXL2	3.00274	0.60816	0.00180642	0.0160948		ENSBTAG00000004073	512854	metastasis associated 1 family member 3 [Source:VGNC Symbol;Acc:VGNC:31715]	MTA3	-1.31679	-1.32039	3.60659	0.00191783	0.0170875
ENSBTAG00000005328	541255	interactor of little elongation complex ELL subunit 2 [Source:VGNC Symbol;Acc:VGNC:30027]	ICE2	1.29671	3.05692	0.00184277	0.0163941		ENSBTAG00000005724	515978	synaptotagmin like 4 [Source:VGNC Symbol;Acc:VGNC:35548]	SYTL4	1.98579	2.00997	1.87376	0.00192775	0.0171608
ENSBTAG00000021575	526153	bromodomain containing 7 [Source:VGNC Symbol;Acc:VGNC:26560]	BRD7	1.03554	6.42085	0.00184323	0.0163941		ENSBTAG00000027337	518169	cathepsin A [Source:VGNC Symbol;Acc:VGNC:27812]	CTSA	-1.0056	-1.00591	6.6064	0.00193399	0.0172013
ENSBTAG00000032982	519474	telomeric repeat binding factor 1 [Source:VGNC Symbol;Acc:VGNC:35749]	TERF1	1.09662	6.02875	0.00184657	0.0164095		ENSBTAG00000018033	533289	phosphatidylinositol-5-phosphate 4-kinase type 2 alpha [Source:VGNC Symbol;Acc:VGNC:32906]	PIP4K2A	1.59486	1.60042	3.5603	0.00195597	0.0173813
ENSBTAG00000006882	505886	IQ motif containing GTPase activating protein 3 [Source:VGNC Symbol;Acc:VGNC:30260]	IQGAP3	-0.862459	7.04362	0.00185693	0.0164767		ENSBTAG00000027916	504994	MALT1 paracaspase [Source:VGNC Symbol;Acc:VGNC:31156]	MALT1	1.91434	1.93694	1.78942	0.00195822	0.0173813
ENSBTAG00000019746	534513	coiled-coil domain containing 66 [Source:VGNC Symbol;Acc:VGNC:26909]	CCDC66	1.60713	2.83823	0.00185737	0.0164767		ENSBTAG00000016042	515889	transmembrane 6 superfamily member 2 [Source:VGNC Symbol;Acc:VGNC:35909]	TM6SF2	-1.28909	-1.29224	3.61422	0.00195934	0.0173813
ENSBTAG00000008136	326578	SNW domain containing 1 [Source:VGNC Symbol;Acc:VGNC:35089]	SNW1	0.933711	6.76209	0.00186593	0.0165382		ENSBTAG00000018749	512320	nudix hydrolase 16 [Source:VGNC Symbol;Acc:VGNC:32330]	NUDT16	-1.88149	-1.88761	3.86975	0.00196437	0.0174107
ENSBTAG00000008484	510378	transmembrane protein 161B [Source:VGNC Symbol;Acc:VGNC:35987]	TMEM161B	1.07366	5.56761	0.00188326	0.0166772		ENSBTAG00000000322	533188	CD2 associated protein [Source:VGNC Symbol;Acc:VGNC:27022]	CD2AP	0.979996	0.980411	6.03438	0.00197838	0.0175196
ENSBTAG00000007375	280858	macrophage migration inhibitory factor [Source:VGNC Symbol;Acc:VGNC:49557]	MIF	-2.27562	2.37549	0.0018864	0.0166905		ENSBTAG00000002767	525962	G protein subunit beta 4 [Source:VGNC Symbol;Acc:VGNC:29461]	GNB4	1.03357	1.03383	7.04371	0.00199244	0.0176287
ENSBTAG00000017488	530358	Kruppel like factor 3 [Source:VGNC Symbol;Acc:VGNC:30630]	KLF3	1.50884	2.896	0.00191463	0.016923		ENSBTAG00000019099	100124521	solute carrier family 25 member 37 [Source:NCBI gene (formerly Entrezgene);Acc:100124521]	SLC25A37	2.04129	2.07692	1.63996	0.0020031	0.017699
ENSBTAG00000051862	104970913	zinc finger protein 37A [Source:NCBI gene (formerly Entrezgene);Acc:104970913]	0	-1.62238	2.31182	0.001916	0.016923		ENSBTAG00000001314	505816	tRNA methyltransferase 6 [Source:VGNC Symbol;Acc:VGNC:36374]	TRMT6	1.0804	1.08092	5.84926	0.00200433	0.017699
ENSBTAG00000017946	781772	family with sequence similarity 25 member A [Source:NCBI gene (formerly Entrezgene);Acc:781772]	0	-1.22914	3.06987	0.00192164	0.0169581		ENSBTAG00000008293	518469	glycerophosphocholine phosphodiesterase 1 [Source:VGNC Symbol;Acc:VGNC:29528]	GPCPD1	2.54069	2.5966	1.18927	0.00200559	0.017699
ENSBTAG00000053317	613682	yippee like 4 [Source:NCBI gene (formerly Entrezgene);Acc:613682]	YPEL4	-1.19183	3.72141	0.00194794	0.0171753		ENSBTAG00000016097	509779	calcium voltage-gated channel subunit alpha1 F [Source:VGNC Symbol;Acc:VGNC:26676]	CACNA1F	-1.38008	-1.38924	2.0881	0.00201241	0.0177437
ENSBTAG00000048737	#N/A	#N/A	#N/A	2.72997	0.661843	0.00196962	0.0173514		ENSBTAG00000038173	#N/A	#N/A	#N/A	1.67688	1.69912	1.48577	0.00202051	0.0177997
ENSBTAG00000017682	538481	tet methylcytosine dioxygenase 2 [Source:VGNC Symbol;Acc:VGNC:35757]	TET2	2.06655	2.12856	0.00197491	0.017383		ENSBTAG00000007483	617896	unc-119 lipid binding chaperone B [Source:VGNC Symbol;Acc:VGNC:36663]	UNC119B	2.2313	2.26832	1.44417	0.00202271	0.0178037
ENSBTAG00000002188	618703	chromosome 25 C16orf89 homolog [Source:VGNC Symbol;Acc:VGNC:58591]	C25H16orf89	-1.69174	2.55836	0.00197963	0.0174094		ENSBTAG00000001286	525427	engulfment and cell motility 3 [Source:VGNC Symbol;Acc:VGNC:28440]	ELMO3	-2.14284	-2.16508	2.45028	0.00202683	0.0178166
ENSBTAG00000010582	525051	bromodomain containing 3 [Source:VGNC Symbol;Acc:VGNC:26558]	BRD3	1.60292	4.59886	0.00198477	0.0174396		ENSBTAG00000004676	524484	transmembrane protein 184A [Source:VGNC Symbol;Acc:VGNC:36009]	TMEM184A	-1.81242	-1.82197	2.91894	0.00202768	0.0178166
ENSBTAG00000012391	524749	MINDY lysine 48 deubiquitinase 2 [Source:VGNC Symbol;Acc:VGNC:31477]	MINDY2	1.37028	3.94083	0.00199479	0.0175125		ENSBTAG00000027425	617478	coiled-coil domain containing 190 [Source:VGNC Symbol;Acc:VGNC:26883]	CCDC190	-2.68845	-2.76023	1.27304	0.00203645	0.0178782
ENSBTAG00000047676	505094	proline dehydrogenase (oxidase) 1 [Source:NCBI gene (formerly Entrezgene);Acc:505094]	PRODH	-0.970663	5.79636	0.00200317	0.0175601		ENSBTAG00000012078	404082	transmembrane protein 176A [Source:VGNC Symbol;Acc:VGNC:36000]	TMEM176A	-1.50376	-1.51396	2.65844	0.00203973	0.0178916
ENSBTAG00000007570	523017	NADH:ubiquinone oxidoreductase complex assembly factor 6 [Source:VGNC Symbol;Acc:VGNC:31958]	NDUFAF6	1.30462	3.64876	0.00200366	0.0175601		ENSBTAG00000017682	538481	tet methylcytosine dioxygenase 2 [Source:VGNC Symbol;Acc:VGNC:35757]	TET2	1.94168	1.95797	2.12856	0.00205151	0.0179794
ENSBTAG00000020436	536335	kinesin family member 27 [Source:VGNC Symbol;Acc:VGNC:30598]	KIF27	1.13129	3.4119	0.00202457	0.0177281		ENSBTAG00000010351	533174	sorting nexin 25 [Source:VGNC Symbol;Acc:VGNC:35104]	SNX25	-1.04955	-1.04997	6.20476	0.00206984	0.0181244
ENSBTAG00000040490	509875	coiled-coil domain containing 3 [Source:NCBI gene (formerly Entrezgene);Acc:509875]	CCDC3	-1.54984	5.31675	0.00203735	0.0178246		ENSBTAG00000009691	617840	SH2B adaptor protein 2 [Source:VGNC Symbol;Acc:VGNC:59364]	SH2B2	-2.94946	-3.03752	1.12742	0.00208007	0.0181984
ENSBTAG00000022588	615152	chromosome 14 C8orf34 homolog [Source:VGNC Symbol;Acc:VGNC:52625]	C14H8orf34	2.11134	1.83758	0.00203934	0.0178267		ENSBTAG00000007167	536389	zinc finger MYM-type containing 5 [Source:VGNC Symbol;Acc:VGNC:56647]	ZMYM5	1.36014	1.36421	3.24017	0.00210858	0.018432
ENSBTAG00000017557	532822	glutaminyl-tRNA amidotransferase subunit QRSL1 [Source:NCBI gene (formerly Entrezgene);Acc:532822]	QRSL1	1.39493	3.01151	0.00205708	0.0179586		ENSBTAG00000004510	614603	sarcosine dehydrogenase [Source:VGNC Symbol;Acc:VGNC:34289]	SARDH	-1.97066	-1.97872	3.79532	0.00211087	0.0184362
ENSBTAG00000007348	515911	signaling receptor and transporter of retinol STRA6 [Source:VGNC Symbol;Acc:VGNC:35417]	STRA6	-1.37045	4.08677	0.00205796	0.0179586		ENSBTAG00000046744	527118	paralemmin 3 [Source:VGNC Symbol;Acc:VGNC:32559]	PALM3	1.67437	1.67859	3.74793	0.00211824	0.0184847
ENSBTAG00000049058	530430	inhibin subunit beta B [Source:VGNC Symbol;Acc:VGNC:30201]	INHBB	1.25181	4.1242	0.0020647	0.018002		ENSBTAG00000020937	615539	small nuclear RNA activating complex polypeptide 1 [Source:VGNC Symbol;Acc:VGNC:35054]	SNAPC1	1.00449	1.0056	4.57879	0.00212116	0.0184942
ENSBTAG00000005987	541270	WD repeat domain 33 [Source:VGNC Symbol;Acc:VGNC:36892]	WDR33	1.03344	4.74111	0.00207084	0.0180401		ENSBTAG00000018229	536348	nuclear factor I X [Source:VGNC Symbol;Acc:VGNC:32042]	NFIX	1.80056	1.81571	2.37248	0.00213246	0.0185633
ENSBTAG00000002086	512236	pre-mRNA processing factor 4B [Source:VGNC Symbol;Acc:VGNC:33381]	PRPF4B	1.16117	7.18851	0.00209711	0.0182533		ENSBTAG00000037778	613667	chemokine (C-X-C motif) ligand 3 [Source:NCBI gene (formerly Entrezgene);Acc:613667]	CXCL3	-1.42243	-1.42507	3.90992	0.00213355	0.0185633
ENSBTAG00000020837	514453	Rho guanine nucleotide exchange factor 16 [Source:VGNC Symbol;Acc:VGNC:26108]	ARHGEF16	-1.3573	3.00826	0.00209901	0.0182542		ENSBTAG00000007455	515176	deoxyribonuclease 1 like 1 [Source:VGNC Symbol;Acc:VGNC:28133]	DNASE1L1	-1.06772	-1.06895	4.65755	0.00213455	0.0185633
ENSBTAG00000017812	506969	ALS2 C-terminal like [Source:VGNC Symbol;Acc:VGNC:25852]	ALS2CL	-1.20109	4.5611	0.00210218	0.0182661		ENSBTAG00000001933	514460	protein phosphatase 2 phosphatase activator [Source:VGNC Symbol;Acc:VGNC:33526]	PTPA	-1.06388	-1.06397	8.46679	0.00216484	0.0187984
ENSBTAG00000030174	513996	acyl-CoA oxidase 1 [Source:VGNC Symbol;Acc:VGNC:25552]	ACOX1	1.44417	3.7145	0.00210719	0.0182941		ENSBTAG00000035226	#N/A	torsin 1A interacting protein 1 [Source:VGNC Symbol;Acc:VGNC:36224]	TOR1AIP1	0.913023	0.913531	5.81047	0.00216528	0.0187984
ENSBTAG00000007634	524648	hook microtubule tethering protein 3 [Source:VGNC Symbol;Acc:VGNC:50090]	HOOK3	1.00344	6.96004	0.00211013	0.018304		ENSBTAG00000047874	100299693	pre-mRNA processing factor 38B [Source:VGNC Symbol;Acc:VGNC:33376]	PRPF38B	1.08608	1.08638	6.68267	0.0021684	0.0188095
ENSBTAG00000015901	514000	armadillo repeat containing 1 [Source:VGNC Symbol;Acc:VGNC:26155]	ARMC1	0.857366	6.84931	0.00211252	0.0183091		ENSBTAG00000044078	787094	tescalcin [Source:VGNC Symbol;Acc:VGNC:35753]	TESC	-1.19478	-1.19763	3.71427	0.00217263	0.0188171
ENSBTAG00000013602	540661	bromodomain and WD repeat domain containing 1 [Source:VGNC Symbol;Acc:VGNC:26575]	BRWD1	1.01148	5.94135	0.00211509	0.0183158		ENSBTAG00000009488	512136	nuclear RNA export factor 1 [Source:VGNC Symbol;Acc:VGNC:32375]	NXF1	2.30291	2.33351	1.56639	0.00217298	0.0188171
ENSBTAG00000001286	525427	engulfment and cell motility 3 [Source:VGNC Symbol;Acc:VGNC:28440]	ELMO3	-1.9228	2.45028	0.00211909	0.0183198		ENSBTAG00000049058	530430	inhibin subunit beta B [Source:VGNC Symbol;Acc:VGNC:30201]	INHBB	1.22762	1.22972	4.1242	0.00218844	0.0189348
ENSBTAG00000007213	327666	signal regulatory protein alpha [Source:NCBI gene (formerly Entrezgene);Acc:327666]	SIRPA	-1.01204	6.03626	0.00211915	0.0183198		ENSBTAG00000006878	785085	TATA-box binding protein associated factor 1 [Source:NCBI gene (formerly Entrezgene);Acc:785085]	0	1.21212	1.21561	3.32528	0.0021964	0.0189806
ENSBTAG00000020748	519943	family with sequence similarity 76 member B [Source:VGNC Symbol;Acc:VGNC:28828]	FAM76B	1.36442	3.55624	0.00212897	0.018389		ENSBTAG00000053007	540877	inositol-trisphosphate 3-kinase B [Source:NCBI gene (formerly Entrezgene);Acc:540877]	ITPKB	-2.38612	-2.42767	1.8654	0.00219852	0.0189806
ENSBTAG00000051419	#N/A	0	0	2.09094	1.81514	0.00214142	0.0184809		ENSBTAG00000022150	#N/A	matrix remodeling associated 5 [Source:VGNC Symbol;Acc:VGNC:31774]	MXRA5	-2.65631	-2.76207	0.842927	0.00220063	0.0189806
ENSBTAG00000018723	515553	solute carrier family 25 member 34 [Source:VGNC Symbol;Acc:VGNC:34760]	SLC25A34	-1.95739	1.93047	0.00216119	0.0186229		ENSBTAG00000012441	535916	SMAD family member 7 [Source:VGNC Symbol;Acc:VGNC:34980]	SMAD7	1.65873	1.66808	2.64918	0.00220119	0.0189806
ENSBTAG00000048257	534967	leukotriene-B(4) omega-hydroxylase 2-like [Source:NCBI gene (formerly Entrezgene);Acc:534967]	0	-1.30185	2.6627	0.00216153	0.0186229		ENSBTAG00000004427	533350	oxysterol binding protein like 8 [Source:VGNC Symbol;Acc:VGNC:32466]	OSBPL8	1.27013	1.27378	3.71498	0.00220365	0.0189807
ENSBTAG00000000856	512690	F-box and leucine rich repeat protein 6 [Source:VGNC Symbol;Acc:VGNC:53864]	FBXL6	-1.44611	7.7222	0.00217836	0.0187519		ENSBTAG00000000256	#N/A	TLE family member 1, transcriptional corepressor [Source:HGNC Symbol;Acc:HGNC:11837]	TLE1	1.7618	1.79503	1.44309	0.00220493	0.0189807
ENSBTAG00000016519	541284	membrane bound O-acyltransferase domain containing 1 [Source:VGNC Symbol;Acc:VGNC:31286]	MBOAT1	1.12752	4.33722	0.00219396	0.0188703		ENSBTAG00000007665	281358	natriuretic peptide receptor 3 [Source:NCBI gene (formerly Entrezgene);Acc:281358]	NPR3	1.45649	1.45764	5.69465	0.00221278	0.0190321
ENSBTAG00000043970	614744	chromosome 14 C8orf37 homolog [Source:VGNC Symbol;Acc:VGNC:52626]	C14H8orf37	2.72618	1.23376	0.00220098	0.0189147		ENSBTAG00000006916	536067	TATA-box binding protein associated factor 15 [Source:VGNC Symbol;Acc:VGNC:54497]	TAF15	2.14787	2.17581	1.74741	0.0022217	0.0190927
ENSBTAG00000018004	520311	SH3 domain containing GRB2 like 3, endophilin A3 [Source:VGNC Symbol;Acc:VGNC:34574]	SH3GL3	1.88234	1.76634	0.00220869	0.018951		ENSBTAG00000018732	515590	heat shock protein family A (Hsp70) member 12B [Source:NCBI gene (formerly Entrezgene);Acc:515590]	HSPA12B	-4.21982	-4.33826	1.89323	0.00222707	0.0191227
ENSBTAG00000021802	505710	migration and invasion enhancer 1 [Source:VGNC Symbol;Acc:VGNC:31468]	MIEN1	-0.950141	6.31216	0.00220893	0.018951		ENSBTAG00000051862	104970913	zinc finger protein 37A [Source:NCBI gene (formerly Entrezgene);Acc:104970913]	0	-1.65454	-1.66871	2.31182	0.00225287	0.0193279
ENSBTAG00000017244	507639	pre-mRNA processing factor 18 [Source:NCBI gene (formerly Entrezgene);Acc:507639]	PRPF18	1.10625	4.73794	0.00222034	0.0190328		ENSBTAG00000010835	504854	cysteine rich with EGF like domains 1 [Source:VGNC Symbol;Acc:VGNC:27704]	CRELD1	-1.02861	-1.02978	4.62883	0.00226343	0.0194022
ENSBTAG00000007152	504832	OS9 endoplasmic reticulum lectin [Source:VGNC Symbol;Acc:VGNC:32455]	OS9	1.78511	2.49911	0.00222297	0.0190393		ENSBTAG00000013856	616564	single stranded DNA binding protein 2 [Source:VGNC Symbol;Acc:VGNC:50023]	SSBP2	-1.48473	-1.4927	3.12333	0.00227494	0.0194688
ENSBTAG00000016297	538167	cyclin Y like 1 [Source:VGNC Symbol;Acc:VGNC:55332]	CCNYL1	1.75161	1.98449	0.00223857	0.0191568		ENSBTAG00000020277	100138150	protein phosphatase 2 scaffold subunit Abeta [Source:VGNC Symbol;Acc:VGNC:33254]	PPP2R1B	1.3508	1.35602	2.93042	0.00227503	0.0194688
ENSBTAG00000001283	506005	RIC1 homolog, RAB6A GEF complex partner 1 [Source:VGNC Symbol;Acc:VGNC:33959]	RIC1	2.48928	1.1615	0.00224234	0.0191617		ENSBTAG00000014670	516056	brain expressed X-linked 5 [Source:VGNC Symbol;Acc:VGNC:50553]	BEX5	-3.65618	-3.77166	1.8797	0.00229055	0.0195851
ENSBTAG00000019502	515299	mediator complex subunit 4 [Source:VGNC Symbol;Acc:VGNC:31368]	MED4	0.963029	6.26595	0.00224291	0.0191617		ENSBTAG00000004449	538147	diacylglycerol kinase epsilon [Source:VGNC Symbol;Acc:VGNC:28027]	DGKE	1.86594	1.89216	1.51101	0.00229304	0.01959
ENSBTAG00000016206	281293	monoamine oxidase A [Source:VGNC Symbol;Acc:VGNC:31174]	MAOA	-1.91807	2.68934	0.00225193	0.0192226		ENSBTAG00000003366	504760	DExD/H-box helicase 58 [Source:VGNC Symbol;Acc:VGNC:27979]	DDX58	1.80427	1.81892	2.43368	0.00235783	0.0201266
ENSBTAG00000011011	512652	slingshot protein phosphatase 2 [Source:VGNC Symbol;Acc:VGNC:35313]	SSH2	1.78684	1.78036	0.00225869	0.0192641		ENSBTAG00000003837	511675	R-spondin 1 [Source:VGNC Symbol;Acc:VGNC:34188]	RSPO1	-3.17098	-3.31778	1.28871	0.00237382	0.0202461
ENSBTAG00000012957	539060	SERPINE1 mRNA binding protein 1 [Source:VGNC Symbol;Acc:VGNC:34461]	SERBP1	0.855462	10.3024	0.00227266	0.0193671		ENSBTAG00000014270	524942	unc-5 netrin receptor B [Source:VGNC Symbol;Acc:VGNC:36671]	UNC5B	-1.00425	-1.00482	5.98587	0.00241211	0.0205554
ENSBTAG00000014478	512668	zinc finger and SCAN domain containing 29 [Source:VGNC Symbol;Acc:VGNC:37379]	ZSCAN29	2.53636	0.911674	0.00227707	0.0193884		ENSBTAG00000000582	512743	lymphocyte antigen 6 complex, locus G6E [Source:NCBI gene (formerly Entrezgene);Acc:512743]	LY6G6E	-1.62371	-1.62405	7.18628	0.00241987	0.0206043
ENSBTAG00000016810	512526	pyrroline-5-carboxylate reductase 3 [Source:VGNC Symbol;Acc:VGNC:33587]	PYCR3	-0.956537	7.42676	0.00228887	0.0194726		ENSBTAG00000026309	515040	zinc fingers and homeoboxes 2 [Source:VGNC Symbol;Acc:VGNC:37183]	ZHX2	-3.65058	-4.06542	0.613245	0.00246731	0.0209749
ENSBTAG00000044044	100300400	clock circadian regulator [Source:VGNC Symbol;Acc:VGNC:27456]	CLOCK	1.65559	2.70725	0.00229113	0.0194756		ENSBTAG00000008142	535490	interferon induced with helicase C domain 1 [Source:VGNC Symbol;Acc:VGNC:30048]	IFIH1	2.56869	2.61103	1.56528	0.00246751	0.0209749
ENSBTAG00000054686	525174	CRACD like [Source:NCBI gene (formerly Entrezgene);Acc:525174]	CRACDL	-1.65595	1.94976	0.00231357	0.0196499		ENSBTAG00000021869	614615	THAP domain containing 5 [Source:VGNC Symbol;Acc:VGNC:35823]	THAP5	1.48458	1.49696	2.01169	0.00248429	0.0210999
ENSBTAG00000011916	538743	ubiquitin specific peptidase 8 [Source:VGNC Symbol;Acc:VGNC:36739]	USP8	0.872577	7.77056	0.00231683	0.0196612		ENSBTAG00000013910	505641	RNA polymerase III subunit GL [Source:VGNC Symbol;Acc:VGNC:84440]	POLR3GL	-1.10565	-1.1073	4.4023	0.00250019	0.0212172
ENSBTAG00000033504	504683	MAK16 homolog [Source:VGNC Symbol;Acc:VGNC:31153]	MAK16	1.00976	5.71336	0.00232259	0.0196937		ENSBTAG00000043582	#N/A	0	0	1.25613	1.25868	3.61603	0.00251622	0.0213355
ENSBTAG00000021048	280713	adrenomedullin [Source:VGNC Symbol;Acc:VGNC:25681]	ADM	-2.42592	2.5065	0.00232874	0.019721		ENSBTAG00000004139	531350	BTB domain and CNC homolog 1 [Source:VGNC Symbol;Acc:VGNC:26402]	BACH1	2.08198	2.10238	2.09126	0.00253247	0.0214553
ENSBTAG00000021964	507526	cadherin 17 [Source:VGNC Symbol;Acc:VGNC:27096]	CDH17	-3.04489	0.656039	0.00232969	0.019721		ENSBTAG00000016724	507384	aminopeptidase like 1 [Source:VGNC Symbol;Acc:VGNC:32197]	NPEPL1	-1.07525	-1.07708	4.25188	0.00254563	0.0215489
ENSBTAG00000033217	497019	tropomyosin 3 [Source:VGNC Symbol;Acc:VGNC:36253]	TPM3	0.926111	9.01857	0.00234507	0.0198346		ENSBTAG00000000224	522371	tetraspanin 15 [Source:VGNC Symbol;Acc:VGNC:36430]	TSPAN15	-1.56082	-1.56638	3.29283	0.00257018	0.0217386
ENSBTAG00000018342	407100	tight junction protein 3 [Source:VGNC Symbol;Acc:VGNC:35883]	TJP3	-1.87537	1.53323	0.00236552	0.019991		ENSBTAG00000009637	286845	solute carrier family 12 member 2 [Source:VGNC Symbol;Acc:VGNC:34665]	SLC12A2	1.42011	1.42457	3.4301	0.0025875	0.0218669
ENSBTAG00000020911	100336530	formin binding protein 4 [Source:VGNC Symbol;Acc:VGNC:54870]	FNBP4	1.13629	5.12741	0.00237068	0.0200179		ENSBTAG00000026283	286771	aspartate beta-hydroxylase [Source:VGNC Symbol;Acc:VGNC:26219]	ASPH	1.32001	1.32789	2.49989	0.00259358	0.0218866
ENSBTAG00000024381	530027	mannosidase alpha class 1A member 1 [Source:VGNC Symbol;Acc:VGNC:31161]	MAN1A1	1.02811	6.48923	0.00240453	0.020287		ENSBTAG00000016937	100137974	chromosome 7 C19orf67 homolog [Source:VGNC Symbol;Acc:VGNC:54413]	C7H19orf67	-0.989716	-0.990374	5.4126	0.00259782	0.0218866
ENSBTAG00000048125	100126045	ectonucleoside triphosphate diphosphohydrolase 2 [Source:VGNC Symbol;Acc:VGNC:28509]	ENTPD2	-2.88701	1.20805	0.00240696	0.0202907		ENSBTAG00000007319	517405	jagged canonical Notch ligand 2 [Source:VGNC Symbol;Acc:VGNC:30362]	JAG2	-1.1537	-1.15436	5.60195	0.00259838	0.0218866
ENSBTAG00000020896	528362	galectin-related inter-fiber protein [Source:VGNC Symbol;Acc:VGNC:29642]	GRIFIN	-2.40164	2.18284	0.00242993	0.0204673		ENSBTAG00000033504	504683	MAK16 homolog [Source:VGNC Symbol;Acc:VGNC:31153]	MAK16	0.993787	0.9943	5.71336	0.00259843	0.0218866
ENSBTAG00000021661	537782	apoptotic peptidase activating factor 1 [Source:VGNC Symbol;Acc:VGNC:25999]	APAF1	1.99335	1.80277	0.0024483	0.020605		ENSBTAG00000018094	539836	zinc finger protein 689 [Source:NCBI gene (formerly Entrezgene);Acc:539836]	ZNF689	1.92337	1.96425	1.34103	0.00260159	0.0218951
ENSBTAG00000018474	507359	interleukin 6 receptor [Source:VGNC Symbol;Acc:VGNC:30167]	IL6R	-1.00066	6.13196	0.00245959	0.0206829		ENSBTAG00000010727	615657	autophagy related 4D cysteine peptidase [Source:VGNC Symbol;Acc:VGNC:26260]	ATG4D	-0.977027	-0.977382	6.12516	0.00263201	0.0221328
ENSBTAG00000022861	#N/A	#N/A	#N/A	2.45531	2.0088	0.00246226	0.0206883		ENSBTAG00000047991	789854	TATA-box binding protein associated factor 4 [Source:VGNC Symbol;Acc:VGNC:57029]	TAF4	1.22584	1.23001	3.27878	0.00264227	0.0222007
ENSBTAG00000015562	317710	phospholipase B domain containing 1 [Source:VGNC Symbol;Acc:VGNC:32978]	PLBD1	-2.06416	1.86851	0.00246917	0.0207293		ENSBTAG00000017488	530358	Kruppel like factor 3 [Source:VGNC Symbol;Acc:VGNC:30630]	KLF3	1.44135	1.44807	2.896	0.00265544	0.022293
ENSBTAG00000010677	535165	LIM and calponin homology domains 1 [Source:VGNC Symbol;Acc:VGNC:30887]	LIMCH1	1.24918	4.73234	0.00247386	0.0207515		ENSBTAG00000022808	100337346	CDK2 associated cullin domain 1 [Source:VGNC Symbol;Acc:VGNC:55940]	CACUL1	2.89954	2.97421	1.25172	0.00267502	0.0224389
ENSBTAG00000007779	522473	general transcription factor IIIC subunit 3 [Source:VGNC Symbol;Acc:VGNC:29704]	GTF3C3	1.24287	3.02829	0.00247695	0.0207603		ENSBTAG00000014170	112445177	MAP7 domain containing 3 [Source:VGNC Symbol;Acc:VGNC:56929]	MAP7D3	1.3331	1.33954	2.67121	0.0026877	0.0225267
ENSBTAG00000005016	767602	adaptor related protein complex 3 subunit beta 1 [Source:VGNC Symbol;Acc:VGNC:25987]	AP3B1	1.21201	5.91762	0.00248392	0.0208015		ENSBTAG00000016819	281758	fatty acid binding protein 3 [Source:VGNC Symbol;Acc:VGNC:28697]	FABP3	-2.22499	-2.22558	7.16023	0.0026943	0.0225634
ENSBTAG00000013736	618054	prominin 1 [Source:VGNC Symbol;Acc:VGNC:33364]	PROM1	1.97226	1.44428	0.00251788	0.0210686		ENSBTAG00000008048	521363	GC-rich sequence DNA-binding factor 2 [Source:VGNC Symbol;Acc:VGNC:29283]	GCFC2	1.72003	1.74675	1.06425	0.00269725	0.0225695
ENSBTAG00000013460	538545	zinc finger and BTB domain containing 11 [Source:VGNC Symbol;Acc:VGNC:37059]	ZBTB11	2.53813	1.09344	0.00253246	0.0211387		ENSBTAG00000000221	537542	RNA binding motif protein 34 [Source:NCBI gene (formerly Entrezgene);Acc:537542]	RBM34	1.31782	1.31874	5.30283	0.00270035	0.0225721
ENSBTAG00000000256	#N/A	TLE family member 1, transcriptional corepressor [Source:HGNC Symbol;Acc:HGNC:11837]	TLE1	1.59249	1.44309	0.00253246	0.0211387		ENSBTAG00000003319	529416	fibronectin leucine rich transmembrane protein 3 [Source:VGNC Symbol;Acc:VGNC:29040]	FLRT3	1.00788	1.00807	7.35327	0.002702	0.0225721
ENSBTAG00000025526	511168	mediator of DNA damage checkpoint 1 [Source:VGNC Symbol;Acc:VGNC:31328]	MDC1	2.45081	1.09842	0.00253248	0.0211387		ENSBTAG00000045757	509486	troponin C1, slow skeletal and cardiac type [Source:VGNC Symbol;Acc:VGNC:36189]	TNNC1	-1.06244	-1.06305	5.81634	0.00270491	0.0225779
ENSBTAG00000012797	539869	defective in cullin neddylation 1 domain containing 1 [Source:VGNC Symbol;Acc:VGNC:27935]	DCUN1D1	1.87423	1.64997	0.00254126	0.0211945		ENSBTAG00000047214	616205	trafficking protein particle complex 1 [Source:VGNC Symbol;Acc:VGNC:36284]	TRAPPC1	-0.991178	-0.991894	5.34784	0.00270846	0.022589
ENSBTAG00000038662	508454	gap junction protein beta 6 [Source:VGNC Symbol;Acc:VGNC:29381]	GJB6	2.98097	3.58089	0.00255091	0.0212575		ENSBTAG00000009982	519266	immunoglobulin superfamily member 8 [Source:VGNC Symbol;Acc:VGNC:30096]	IGSF8	-1.01769	-1.01863	5.08982	0.00272024	0.0226538
ENSBTAG00000032253	784245	RAD54 like 2 [Source:VGNC Symbol;Acc:VGNC:49152]	RAD54L2	2.58988	1.41655	0.00256974	0.0213969		ENSBTAG00000020707	534326	adhesion G protein-coupled receptor G6 [Source:VGNC Symbol;Acc:VGNC:25669]	ADGRG6	1.25601	1.25871	3.64408	0.00272132	0.0226538
ENSBTAG00000016732	534479	dynein axonemal intermediate chain 2 [Source:VGNC Symbol;Acc:VGNC:28130]	DNAI2	-2.02085	1.65907	0.00258378	0.0214963		ENSBTAG00000027059	613997	actin related protein 2/3 complex inhibitor [Source:NCBI gene (formerly Entrezgene);Acc:613997]	ARPIN	-1.0077	-1.00878	4.93568	0.00272291	0.0226538
ENSBTAG00000011986	539290	phospholipid scramblase 4 [Source:VGNC Symbol;Acc:VGNC:33053]	PLSCR4	1.87016	1.58022	0.00258671	0.0215031		ENSBTAG00000004457	517688	ORAI calcium release-activated calcium modulator 1 [Source:VGNC Symbol;Acc:VGNC:32443]	ORAI1	-1.11881	-1.11991	4.90251	0.00272668	0.0226666
ENSBTAG00000019569	523328	CD151 molecule [Source:VGNC Symbol;Acc:VGNC:53655]	CD151	-1.1141	8.57378	0.0026491	0.0220037		ENSBTAG00000008533	541048	glucocorticoid induced 1 [Source:VGNC Symbol;Acc:VGNC:29393]	GLCCI1	2.13907	2.17546	1.39976	0.00274056	0.0227537
ENSBTAG00000018833	510256	SV2 related protein [Source:VGNC Symbol;Acc:VGNC:35498]	SVOP	2.89462	0.984387	0.0026553	0.0220373		ENSBTAG00000005028	539704	HIRA interacting protein 3 [Source:VGNC Symbol;Acc:VGNC:29862]	HIRIP3	-1.31836	-1.32295	3.2305	0.00274163	0.0227537
ENSBTAG00000002843	511431	acyl-CoA thioesterase 4 [Source:NCBI gene (formerly Entrezgene);Acc:511431]	ACOT4	-1.80377	2.57891	0.00266943	0.0221365		ENSBTAG00000004561	286857	paired box 6 [Source:VGNC Symbol;Acc:VGNC:32598]	PAX6	1.26008	1.2657	2.94589	0.00277414	0.0229825
ENSBTAG00000008464	529923	ATP binding cassette subfamily B member 9 [Source:VGNC Symbol;Acc:VGNC:25467]	ABCB9	-1.48663	2.59158	0.00268543	0.022251		ENSBTAG00000007596	538437	GTP binding protein overexpressed in skeletal muscle [Source:VGNC Symbol;Acc:VGNC:29315]	GEM	1.31157	1.31332	4.59787	0.00277536	0.0229825
ENSBTAG00000015670	534526	p21 (RAC1) activated kinase 3 [Source:VGNC Symbol;Acc:VGNC:53659]	PAK3	1.27715	2.48926	0.00269015	0.022272		ENSBTAG00000008996	100138159	SFI1 centrin binding protein [Source:VGNC Symbol;Acc:VGNC:34514]	SFI1	-1.30561	-1.3086	3.86315	0.00277597	0.0229825
ENSBTAG00000004555	100337021	LDL receptor related protein 2 [Source:VGNC Symbol;Acc:VGNC:30990]	LRP2	-2.83448	1.11813	0.00269679	0.0222962		ENSBTAG00000003779	768236	zinc finger C4H2-type containing [Source:VGNC Symbol;Acc:VGNC:37114]	ZC4H2	-2.4563	-2.55927	0.85981	0.00277876	0.0229869
ENSBTAG00000020180	534351	transmembrane p24 trafficking protein 5 [Source:VGNC Symbol;Acc:VGNC:35938]	TMED5	1.3263	2.89863	0.00269746	0.0222962		ENSBTAG00000011417	#N/A	centriolin [Source:VGNC Symbol;Acc:VGNC:52755]	CNTRL	2.471	2.56915	0.738044	0.00278465	0.0230018
ENSBTAG00000046079	#N/A	#N/A	#N/A	1.67093	2.10403	0.00270039	0.0223023		ENSBTAG00000016041	534859	UDP-GlcNAc:betaGal beta-1,3-N-acetylglucosaminyltransferase 8 [Source:VGNC Symbol;Acc:VGNC:26384]	B3GNT8	-1.7011	-1.71111	2.81319	0.00278508	0.0230018
ENSBTAG00000048565	286842	brain abundant membrane attached signal protein 1 [Source:NCBI gene (formerly Entrezgene);Acc:286842]	BASP1	1.14672	9.04133	0.00270365	0.0223112		ENSBTAG00000001029	512056	RAS guanyl releasing protein 2 [Source:VGNC Symbol;Acc:VGNC:33748]	RASGRP2	-2.49439	-2.54125	1.32743	0.00279104	0.023029
ENSBTAG00000000342	514996	procollagen-lysine,2-oxoglutarate 5-dioxygenase 3 [Source:VGNC Symbol;Acc:VGNC:33041]	PLOD3	-0.940617	5.9355	0.00272063	0.0224331		ENSBTAG00000006940	100141158	ubiquitin specific peptidase 48 [Source:VGNC Symbol;Acc:VGNC:36733]	USP48	1.0399	1.04132	4.47642	0.0027929	0.023029
ENSBTAG00000034848	526525	F2R like trypsin receptor 1 [Source:VGNC Symbol;Acc:VGNC:28684]	F2RL1	-2.0205	1.5037	0.00273492	0.0225327		ENSBTAG00000049861	783109	Bos taurus BoWC1.1 (WC1), mRNA. [Source:RefSeq mRNA;Acc:NM_001281899]	WC1	2.19054	2.21058	1.97752	0.00281643	0.0232042
ENSBTAG00000002367	535210	host cell factor C1 regulator 1 [Source:VGNC Symbol;Acc:VGNC:29772]	HCFC1R1	-1.2102	5.09129	0.00275299	0.0226632		ENSBTAG00000008596	785152	prickle planar cell polarity protein 1 [Source:VGNC Symbol;Acc:VGNC:33315]	PRICKLE1	1.08337	1.08466	4.63026	0.0028194	0.0232099
ENSBTAG00000001824	510658	solute carrier family 2 member 6 [Source:VGNC Symbol;Acc:VGNC:34802]	SLC2A6	-1.0238	4.51476	0.0027677	0.0227519		ENSBTAG00000030650	280946	thiosulfate sulfurtransferase [Source:VGNC Symbol;Acc:VGNC:36449]	TST	-1.07524	-1.07708	4.15947	0.00283008	0.023279
ENSBTAG00000015368	538801	septin 4 [Source:VGNC Symbol;Acc:VGNC:34456]	SEPTIN4	-1.437	4.03786	0.00276824	0.0227519		ENSBTAG00000019757	506646	SDS3 homolog, SIN3A corepressor complex component [Source:VGNC Symbol;Acc:VGNC:35460]	SUDS3	0.945309	0.945751	6.01376	0.00284283	0.0233649
ENSBTAG00000019537	540667	membrane associated ring-CH-type finger 8 [Source:VGNC Symbol;Acc:VGNC:55990]	MARCHF8	-1.24567	4.30747	0.00278092	0.0228377		ENSBTAG00000008886	535434	storkhead box 2 [Source:VGNC Symbol;Acc:VGNC:35415]	STOX2	2.93592	3.06463	0.786468	0.0028557	0.0234518
ENSBTAG00000016769	613810	cyclin dependent kinase 16 [Source:VGNC Symbol;Acc:VGNC:27119]	CDK16	-1.11644	5.21007	0.00279292	0.0229177		ENSBTAG00000008991	514108	eukaryotic translation initiation factor 4E nuclear import factor 1 [Source:VGNC Symbol;Acc:VGNC:28414]	EIF4ENIF1	2.27574	2.3131	1.4609	0.00286524	0.0235112
ENSBTAG00000050848	787099	zinc finger CCHC-type containing 2 [Source:NCBI gene (formerly Entrezgene);Acc:787099]	ZCCHC2	2.03333	1.22692	0.00281109	0.0230482		ENSBTAG00000012120	540975	TCDD inducible poly(ADP-ribose) polymerase [Source:VGNC Symbol;Acc:VGNC:53609]	TIPARP	1.2418	1.24263	5.44263	0.00287659	0.0235778
ENSBTAG00000009737	#N/A	#N/A	#N/A	-2.72974	2.14932	0.00281902	0.0230947		ENSBTAG00000012330	280729	beta-2-microglobulin [Source:NCBI gene (formerly Entrezgene);Acc:783680]	B2M	0.962873	0.962897	10.1007	0.00287975	0.0235778
ENSBTAG00000004755	512402	SH3KBP1 binding protein 1 [Source:VGNC Symbol;Acc:VGNC:34602]	SHKBP1	-1.52687	4.40768	0.00282172	0.0230982		ENSBTAG00000018912	513377	Rho guanine nucleotide exchange factor 1 [Source:VGNC Symbol;Acc:VGNC:52179]	ARHGEF1	-1.024	-1.02458	5.6844	0.00288097	0.0235778
ENSBTAG00000009175	506083	ribosomal protein S6 kinase B2 [Source:VGNC Symbol;Acc:VGNC:34147]	RPS6KB2	-1.09264	6.18829	0.00283655	0.0232009		ENSBTAG00000008102	100139581	cartilage acidic protein 1 [Source:VGNC Symbol;Acc:VGNC:27725]	CRTAC1	-1.26254	-1.26639	3.67342	0.00288264	0.0235778
ENSBTAG00000011517	618485	coiled-coil domain containing 106 [Source:VGNC Symbol;Acc:VGNC:26831]	CCDC106	-1.99694	1.49588	0.00283976	0.0232085		ENSBTAG00000004603	537511	polyhomeotic homolog 2 [Source:VGNC Symbol;Acc:VGNC:32811]	PHC2	-0.951295	-0.951477	7.16342	0.0028876	0.0235995
ENSBTAG00000006388	533064	F-box protein 45 [Source:VGNC Symbol;Acc:VGNC:28915]	FBXO45	1.44164	3.76519	0.00284739	0.0232522		ENSBTAG00000013357	514957	pumilio RNA binding family member 3 [Source:VGNC Symbol;Acc:VGNC:33571]	PUM3	0.889019	0.88922	6.88287	0.00289025	0.0236022
ENSBTAG00000031741	783152	zinc finger protein 322 [Source:NCBI gene (formerly Entrezgene);Acc:783152]	ZNF322	2.39547	0.769766	0.00285419	0.0232728		ENSBTAG00000039658	784973	programmed cell death 7 [Source:VGNC Symbol;Acc:VGNC:55131]	PDCD7	1.12308	1.12534	3.83308	0.00289389	0.0236129
ENSBTAG00000054095	615255	glia maturation factor beta [Source:NCBI gene (formerly Entrezgene);Acc:615255]	GMFB	1.44594	2.65256	0.00285675	0.0232728		ENSBTAG00000021681	615857	proline rich 11 [Source:VGNC Symbol;Acc:VGNC:33388]	PRR11	1.26626	1.2695	3.64192	0.00291569	0.0237717
ENSBTAG00000015106	514360	desmoplakin [Source:VGNC Symbol;Acc:VGNC:28225]	DSP	1.17081	3.44533	0.00285761	0.0232728		ENSBTAG00000001675	615813	inositol-trisphosphate 3-kinase A [Source:VGNC Symbol;Acc:VGNC:30344]	ITPKA	-1.76665	-1.78329	1.83756	0.00292846	0.0238567
ENSBTAG00000006504	522380	trichoplein keratin filament binding [Source:VGNC Symbol;Acc:VGNC:35697]	TCHP	1.03217	5.07335	0.00285907	0.0232728		ENSBTAG00000014947	282333	protein tyrosine phosphatase non-receptor type 13 [Source:VGNC Symbol;Acc:VGNC:53774]	PTPN13	1.32287	1.33015	2.56616	0.00296106	0.024103
ENSBTAG00000032517	616240	BAF chromatin remodeling complex subunit BCL7A [Source:VGNC Symbol;Acc:VGNC:53891]	BCL7A	2.4729	1.67052	0.00286607	0.0233111		ENSBTAG00000003692	281562	uncoupling protein 2 [Source:VGNC Symbol;Acc:VGNC:36641]	UCP2	-1.21505	-1.21602	5.20608	0.00297103	0.0241649
ENSBTAG00000004277	280834	EvC ciliary complex subunit 2 [Source:VGNC Symbol;Acc:VGNC:28635]	EVC2	-1.63211	2.35895	0.00290867	0.0236387		ENSBTAG00000043550	3283889	cytochrome b [Source:NCBI gene (formerly Entrezgene);Acc:3283889]	CYTB	-1.33103	-1.33106	11.0213	0.00301227	0.0244807
ENSBTAG00000008008	281534	toll like receptor 2 [Source:VGNC Symbol;Acc:VGNC:49982]	TLR2	-1.38132	3.29653	0.00291781	0.0236941		ENSBTAG00000045767	505016	linker for activation of T cells family member 2 [Source:VGNC Symbol;Acc:VGNC:30799]	LAT2	-2.39471	-2.43636	1.44358	0.00305017	0.0247689
ENSBTAG00000019784	533617	protein phosphatase 2 regulatory subunit B'epsilon [Source:VGNC Symbol;Acc:VGNC:33264]	PPP2R5E	1.16766	5.31871	0.00293203	0.0237906		ENSBTAG00000021051	505578	zinc finger HIT-type containing 6 [Source:VGNC Symbol;Acc:VGNC:37361]	ZNHIT6	1.11554	1.1158	7.00203	0.00306051	0.0248331
ENSBTAG00000017560	617530	CCAAT enhancer binding protein gamma [Source:VGNC Symbol;Acc:VGNC:27163]	CEBPG	0.988519	4.56354	0.00293676	0.02381		ENSBTAG00000052965	101905010	0	0	-1.5906	-1.60082	2.39644	0.00307146	0.0249021
ENSBTAG00000008300	280794	fibronectin 1 [Source:VGNC Symbol;Acc:VGNC:29056]	FN1	1.06117	11.5157	0.00295315	0.0239214		ENSBTAG00000000892	782472	cyclic GMP-AMP synthase [Source:VGNC Symbol;Acc:VGNC:31271]	CGAS	2.15826	2.21071	1.03541	0.00308914	0.0250138
ENSBTAG00000014917	524743	GTP binding protein 4 [Source:VGNC Symbol;Acc:VGNC:29710]	GTPBP4	0.851505	7.79707	0.0029552	0.0239214		ENSBTAG00000016373	508011	tetratricopeptide repeat domain 26 [Source:VGNC Symbol;Acc:VGNC:36465]	TTC26	1.32322	1.32792	3.13706	0.00309015	0.0250138
ENSBTAG00000016316	508144	zinc finger ZZ-type and EF-hand domain containing 1 [Source:VGNC Symbol;Acc:VGNC:37396]	ZZEF1	2.13224	1.32076	0.00296921	0.0240157		ENSBTAG00000018178	618340	nuclear prelamin A recognition factor [Source:VGNC Symbol;Acc:VGNC:55858]	NARF	1.19885	1.20045	4.66597	0.0031304	0.0253194
ENSBTAG00000004751	537578	spectrin beta, non-erythrocytic 4 [Source:VGNC Symbol;Acc:VGNC:35254]	SPTBN4	-1.11559	5.87239	0.00298113	0.0240929		ENSBTAG00000016744	535571	cell cycle associated protein 1 [Source:VGNC Symbol;Acc:VGNC:26751]	CAPRIN1	0.904471	0.90468	6.95519	0.00314104	0.0253853
ENSBTAG00000051340	#N/A	0	0	3.26496	0.590607	0.00300048	0.02423		ENSBTAG00000044105	506618	forkhead box O1 [Source:VGNC Symbol;Acc:VGNC:29098]	FOXO1	1.46243	1.4696	2.97016	0.00314565	0.0254024
ENSBTAG00000010671	785371	GLI family zinc finger 3 [Source:VGNC Symbol;Acc:VGNC:29401]	GLI3	1.24955	3.17747	0.00302066	0.0243737		ENSBTAG00000053346	613651	splA/ryanodine receptor domain and SOCS box containing 2 [Source:NCBI gene (formerly Entrezgene);Acc:613651]	SPSB2	-1.70124	-1.7192	1.80317	0.0031659	0.0255456
ENSBTAG00000008827	523846	SPARC (osteonectin), cwcv and kazal like domains proteoglycan 2 [Source:VGNC Symbol;Acc:VGNC:35226]	SPOCK2	-3.75444	0.944696	0.0030455	0.0245386		ENSBTAG00000001037	520058	mitogen-activated protein kinase kinase kinase kinase 2 [Source:VGNC Symbol;Acc:VGNC:31205]	MAP4K2	-1.07697	-1.07845	4.56442	0.00318853	0.0257078
ENSBTAG00000024928	338033	TNF receptor superfamily member 1B [Source:VGNC Symbol;Acc:VGNC:36165]	TNFRSF1B	2.20743	1.63645	0.00304927	0.0245386		ENSBTAG00000016316	508144	zinc finger ZZ-type and EF-hand domain containing 1 [Source:VGNC Symbol;Acc:VGNC:37396]	ZZEF1	2.09138	2.13036	1.32076	0.0032006	0.0257848
ENSBTAG00000003609	511011	polysaccharide biosynthesis domain containing 1 [Source:VGNC Symbol;Acc:VGNC:32604]	PBDC1	1.01027	5.93835	0.0030495	0.0245386		ENSBTAG00000017179	525655	ubiquitin specific peptidase 12 [Source:VGNC Symbol;Acc:VGNC:52840]	USP12	0.97817	0.978494	6.46595	0.00320561	0.0258046
ENSBTAG00000017150	505422	ETS homologous factor [Source:VGNC Symbol;Acc:VGNC:28375]	EHF	-3.22265	0.740092	0.00305074	0.0245386		ENSBTAG00000018126	512144	VPS53 subunit of GARP complex [Source:VGNC Symbol;Acc:VGNC:36829]	VPS53	1.10814	1.10928	4.87967	0.00325336	0.0261684
ENSBTAG00000025181	617455	coiled-coil domain containing 85C [Source:VGNC Symbol;Acc:VGNC:26925]	CCDC85C	-1.00212	5.23457	0.00305329	0.0245397		ENSBTAG00000021808	282160	calcium voltage-gated channel auxiliary subunit beta 3 [Source:VGNC Symbol;Acc:VGNC:26685]	CACNB3	-1.02888	-1.0295	5.79441	0.00325852	0.0261772
ENSBTAG00000018158	515372	transmembrane protein 139 [Source:VGNC Symbol;Acc:VGNC:35972]	TMEM139	-1.18177	3.6385	0.00306158	0.0245869		ENSBTAG00000019665	281860	interleukin 1 receptor antagonist [Source:VGNC Symbol;Acc:VGNC:30136]	IL1RN	-1.14146	-1.14422	3.76313	0.00325961	0.0261772
ENSBTAG00000030384	100139115	surfeit locus protein 1 [Source:NCBI gene (formerly Entrezgene);Acc:100139115]	SURF1	-0.871416	6.90679	0.00310617	0.0249136		ENSBTAG00000016147	505789	centrin 4 [Source:NCBI gene (formerly Entrezgene);Acc:505789]	CETN4	0.886654	0.886788	7.52385	0.00326479	0.0261981
ENSBTAG00000026502	282211	cytochrome P450, family 2, subfamily D, polypeptide 6 [Source:NCBI gene (formerly Entrezgene);Acc:282211]	CYP2D14	-1.36561	3.14829	0.00310716	0.0249136		ENSBTAG00000007960	534799	DNA topoisomerase I [Source:VGNC Symbol;Acc:VGNC:49136]	TOP1	1.08418	1.08431	7.84721	0.00328047	0.0263032
ENSBTAG00000038831	540828	phytanoyl-CoA dioxygenase domain containing 1 [Source:NCBI gene (formerly Entrezgene);Acc:540828]	PHYHD1	-1.10188	4.11276	0.00312019	0.0249984		ENSBTAG00000011420	511923	carbonic anhydrase 9 [Source:VGNC Symbol;Acc:VGNC:26659]	CA9	-1.34446	-1.35042	3.20184	0.00328869	0.0263484
ENSBTAG00000004753	515147	ribitol xylosyltransferase 1 [Source:VGNC Symbol;Acc:VGNC:36091]	RXYLT1	1.02204	4.61482	0.00312389	0.0250083		ENSBTAG00000019537	540667	membrane associated ring-CH-type finger 8 [Source:VGNC Symbol;Acc:VGNC:55990]	MARCHF8	-1.20685	-1.20864	4.30747	0.0032953	0.0263805
ENSBTAG00000007483	617896	unc-119 lipid binding chaperone B [Source:VGNC Symbol;Acc:VGNC:36663]	UNC119B	2.1855	1.44417	0.00314983	0.0251911		ENSBTAG00000017734	519494	vacuolar protein sorting 13 homolog A [Source:NCBI gene (formerly Entrezgene);Acc:519494]	0	1.86206	1.88824	1.48755	0.00330368	0.0264268
ENSBTAG00000043550	3283889	cytochrome b [Source:NCBI gene (formerly Entrezgene);Acc:3283889]	CYTB	-1.32344	11.0213	0.00315167	0.0251911		ENSBTAG00000005990	281135	sphingosine-1-phosphate receptor 1 [Source:VGNC Symbol;Acc:VGNC:34252]	S1PR1	1.98064	1.9955	2.0206	0.00330752	0.0264368
ENSBTAG00000025398	504548	ubiquitin D [Source:NCBI gene (formerly Entrezgene);Acc:504548]	0	-3.32264	1.47489	0.00315783	0.0252205		ENSBTAG00000017232	534909	kinesin family member 13B [Source:VGNC Symbol;Acc:VGNC:30582]	KIF13B	1.99068	2.03223	1.20371	0.0033146	0.0264519
ENSBTAG00000021162	515249	cytoskeleton associated protein 2 [Source:VGNC Symbol;Acc:VGNC:27380]	CKAP2	1.01611	6.93982	0.00317003	0.0252981		ENSBTAG00000012929	537625	centrosomal protein 85 like [Source:VGNC Symbol;Acc:VGNC:27217]	CEP85L	1.29237	1.29768	3.24674	0.00331462	0.0264519
ENSBTAG00000010252	506448	zinc finger protein 397 [Source:NCBI gene (formerly Entrezgene);Acc:506448]	ZNF397	-1.3868	2.60549	0.00321496	0.0256365		ENSBTAG00000018967	540431	Yip1 domain family member 3 [Source:VGNC Symbol;Acc:VGNC:37026]	YIPF3	-0.972159	-0.972349	7.10312	0.00334625	0.0266835
ENSBTAG00000020279	504346	ALG9 alpha-1,2-mannosyltransferase [Source:NCBI gene (formerly Entrezgene);Acc:504346]	0	-1.24627	3.82816	0.00322469	0.025694		ENSBTAG00000044044	100300400	clock circadian regulator [Source:VGNC Symbol;Acc:VGNC:27456]	CLOCK	1.55653	1.56502	2.70725	0.00337943	0.0269258
ENSBTAG00000020644	540179	glypican 4 [Source:VGNC Symbol;Acc:VGNC:29526]	GPC4	-6.31632	0.42967	0.00323518	0.0257574		ENSBTAG00000021695	507949	glycerate kinase [Source:VGNC Symbol;Acc:VGNC:29429]	GLYCTK	-1.41339	-1.41951	2.80818	0.00338193	0.0269258
ENSBTAG00000012630	513841	peptidase domain containing associated with muscle regeneration 1 [Source:VGNC Symbol;Acc:VGNC:32562]	PAMR1	-1.88002	1.48518	0.00324617	0.0258247		ENSBTAG00000019110	507736	proline rich nuclear receptor coactivator 1 [Source:VGNC Symbol;Acc:VGNC:33098]	PNRC1	2.13943	2.1658	1.84309	0.00340549	0.0270758
ENSBTAG00000003112	508940	THUMP domain containing 3 [Source:VGNC Symbol;Acc:VGNC:35855]	THUMPD3	1.01697	5.32201	0.00328169	0.0260869		ENSBTAG00000003994	282261	insulin like growth factor binding protein 3 [Source:VGNC Symbol;Acc:VGNC:30085]	IGFBP3	-1.74798	-1.74967	4.80913	0.0034061	0.0270758
ENSBTAG00000019889	767887	DIS3 homolog, exosome endoribonuclease and 3'-5' exoribonuclease [Source:VGNC Symbol;Acc:VGNC:28072]	DIS3	1.14023	3.94384	0.00328833	0.0261193		ENSBTAG00000015648	509302	DnaJ heat shock protein family (Hsp40) member C21 [Source:NCBI gene (formerly Entrezgene);Acc:509302]	DNAJC21	0.847832	0.847968	7.32556	0.00342959	0.0272413
ENSBTAG00000001029	512056	RAS guanyl releasing protein 2 [Source:VGNC Symbol;Acc:VGNC:33748]	RASGRP2	-2.69305	1.32743	0.00329549	0.0261557		ENSBTAG00000007442	767893	A-kinase anchoring protein 9 [Source:VGNC Symbol;Acc:VGNC:25791]	AKAP9	0.985822	0.98606	6.87982	0.00346939	0.0275359
ENSBTAG00000005828	504429	MER proto-oncogene, tyrosine kinase [Source:VGNC Symbol;Acc:VGNC:31391]	MERTK	-2.0914	1.66949	0.00329852	0.0261593		ENSBTAG00000032446	#N/A	0	0	1.97596	2.0086	1.48059	0.00347225	0.0275372
ENSBTAG00000013615	505144	cysteine and histidine rich domain containing 1 [Source:VGNC Symbol;Acc:VGNC:27309]	CHORDC1	0.907129	6.21014	0.00331257	0.0262503		ENSBTAG00000011252	788127	RAD50 double strand break repair protein [Source:VGNC Symbol;Acc:VGNC:52870]	RAD50	1.01312	1.0134	6.78596	0.00347811	0.0275621
ENSBTAG00000015202	493709	distal membrane arm assembly complex 2 like [Source:VGNC Symbol;Acc:VGNC:54625]	DMAC2L	1.0601	4.07182	0.0033331	0.0263924		ENSBTAG00000018201	512373	triokinase and FMN cyclase [Source:VGNC Symbol;Acc:VGNC:56287]	TKFC	-1.08796	-1.09016	4.0224	0.00348636	0.027606
ENSBTAG00000011601	404164	ST3 beta-galactoside alpha-2,3-sialyltransferase 5 [Source:VGNC Symbol;Acc:VGNC:35334]	ST3GAL5	1.78669	2.2031	0.00335001	0.0265057		ENSBTAG00000012470	511816	SNAP associated protein [Source:VGNC Symbol;Acc:VGNC:35058]	SNAPIN	-1.0059	-1.00716	4.67557	0.0035226	0.0278713
ENSBTAG00000004570	540901	paired related homeobox 1 [Source:VGNC Symbol;Acc:VGNC:33412]	PRRX1	1.68171	4.51804	0.00336136	0.0265749		ENSBTAG00000011338	100125763	neuronal regeneration related protein [Source:NCBI gene (formerly Entrezgene);Acc:100125763]	NREP	2.2464	2.26748	3.05373	0.00353424	0.0279417
ENSBTAG00000013772	784123	serine and arginine repetitive matrix 1 [Source:VGNC Symbol;Acc:VGNC:35294]	SRRM1	1.00838	8.18933	0.00337502	0.0266622		ENSBTAG00000003395	523338	zinc finger RANBP2-type containing 1 [Source:VGNC Symbol;Acc:VGNC:37371]	ZRANB1	1.23614	1.23842	4.02441	0.00355426	0.0280781
ENSBTAG00000001702	509812	transmembrane protein 107 [Source:VGNC Symbol;Acc:VGNC:35947]	TMEM107	1.34858	3.64643	0.00338667	0.0267334		ENSBTAG00000018383	513059	ATPase family AAA domain containing 5 [Source:VGNC Symbol;Acc:VGNC:26235]	ATAD5	1.07306	1.07403	5.0457	0.00358351	0.0282872
ENSBTAG00000004036	511119	gap junction protein gamma 1 [Source:VGNC Symbol;Acc:VGNC:29382]	GJC1	1.09086	4.79712	0.00340196	0.0268333		ENSBTAG00000017875	538835	Rho GTPase activating protein 30 [Source:VGNC Symbol;Acc:VGNC:26088]	ARHGAP30	-1.51567	-1.52658	2.04653	0.00360233	0.0283946
ENSBTAG00000004072	493728	capping actin protein of muscle Z-line subunit alpha 2 [Source:VGNC Symbol;Acc:VGNC:26757]	CAPZA2	0.843797	7.28486	0.00341086	0.0268727		ENSBTAG00000012818	503621	PDZ and LIM domain 5 [Source:VGNC Symbol;Acc:VGNC:32711]	PDLIM5	1.46188	1.46823	3.11064	0.00360269	0.0283946
ENSBTAG00000014270	524942	unc-5 netrin receptor B [Source:VGNC Symbol;Acc:VGNC:36671]	UNC5B	-0.971248	5.98587	0.00341224	0.0268727		ENSBTAG00000013664	504954	filamin A interacting protein 1 like [Source:VGNC Symbol;Acc:VGNC:29013]	FILIP1L	1.71432	1.71497	6.92062	0.00361729	0.0284777
ENSBTAG00000020089	537257	ubiquitin specific peptidase 32 [Source:VGNC Symbol;Acc:VGNC:36722]	USP32	1.46955	2.18081	0.00341718	0.0268908		ENSBTAG00000017744	767948	Fas associated factor family member 2 [Source:VGNC Symbol;Acc:VGNC:28706]	FAF2	0.964355	0.964785	5.98637	0.00362521	0.0284777
ENSBTAG00000040590	#N/A	0	0	1.51601	2.20546	0.00342488	0.0269306		ENSBTAG00000010370	512628	clathrin binding box of aftiphilin containing 1 [Source:VGNC Symbol;Acc:VGNC:53934]	CLBA1	-1.15909	-1.16133	3.72379	0.0036266	0.0284777
ENSBTAG00000008293	518469	glycerophosphocholine phosphodiesterase 1 [Source:VGNC Symbol;Acc:VGNC:29528]	GPCPD1	2.5149	1.18927	0.00342968	0.0269475		ENSBTAG00000008518	533865	mediator complex subunit 25 [Source:VGNC Symbol;Acc:VGNC:31362]	MED25	-1.30501	-1.30634	4.86669	0.00362714	0.0284777
ENSBTAG00000032617	785057	F-box protein 44 [Source:NCBI gene (formerly Entrezgene);Acc:785057]	FBXO44	-1.5318	2.14783	0.00345255	0.027086		ENSBTAG00000006631	517588	GLI family zinc finger 1 [Source:VGNC Symbol;Acc:VGNC:29399]	GLI1	-3.45137	-3.6012	1.34109	0.00362724	0.0284777
ENSBTAG00000021999	506812	carnitine palmitoyltransferase 1A [Source:VGNC Symbol;Acc:VGNC:27676]	CPT1A	-0.996668	5.5315	0.00345264	0.027086		ENSBTAG00000016469	783548	tankyrase 1 binding protein 1 [Source:VGNC Symbol;Acc:VGNC:36185]	TNKS1BP1	-1.27361	-1.27435	5.64773	0.00369155	0.0289553
ENSBTAG00000003902	533884	zinc finger protein 512 [Source:VGNC Symbol;Acc:VGNC:37290]	ZNF512	1.45712	2.48365	0.00346808	0.0271813		ENSBTAG00000017056	539579	pyruvate kinase L/R [Source:VGNC Symbol;Acc:VGNC:32943]	PKLR	-1.8353	-1.8691	1.09472	0.00369376	0.0289553
ENSBTAG00000011205	506058	protein phosphatase 1 regulatory subunit 42 [Source:VGNC Symbol;Acc:VGNC:53877]	PPP1R42	1.78351	1.11514	0.00347013	0.0271813		ENSBTAG00000004263	518974	ATPase H+ transporting V0 subunit a4 [Source:VGNC Symbol;Acc:VGNC:26309]	ATP6V0A4	-2.72454	-2.83132	0.963896	0.00371454	0.0290958
ENSBTAG00000003160	527134	leucine rich repeats and calponin homology domain containing 4 [Source:VGNC Symbol;Acc:VGNC:30974]	LRCH4	-1.07199	4.39755	0.00347565	0.0272036		ENSBTAG00000015254	507188	galactosidase beta 1 [Source:VGNC Symbol;Acc:VGNC:29391]	GLB1	-0.881689	-0.881967	6.54261	0.0037314	0.0292054
ENSBTAG00000016373	508011	tetratricopeptide repeat domain 26 [Source:VGNC Symbol;Acc:VGNC:36465]	TTC26	1.33126	3.13706	0.00348766	0.0272767		ENSBTAG00000011528	615202	small integral membrane protein 11A [Source:NCBI gene (formerly Entrezgene);Acc:615202]	SMIM11A	-1.07068	-1.07172	5.06428	0.0037401	0.029251
ENSBTAG00000037902	#N/A	#N/A	#N/A	-1.44795	2.64873	0.00349929	0.0273466		ENSBTAG00000015670	534526	p21 (RAC1) activated kinase 3 [Source:VGNC Symbol;Acc:VGNC:53659]	PAK3	1.35873	1.37216	2.48926	0.0037483	0.0292926
ENSBTAG00000020933	505341	host cell factor C2 [Source:VGNC Symbol;Acc:VGNC:29773]	HCFC2	1.21239	3.40169	0.00352974	0.0275634		ENSBTAG00000005371	537812	dolichyl-phosphate N-acetylglucosaminephosphotransferase 1 [Source:VGNC Symbol;Acc:VGNC:28174]	DPAGT1	-0.941941	-0.942907	4.84567	0.00375333	0.0293094
ENSBTAG00000006212	507792	GTF2I repeat domain containing 1 [Source:VGNC Symbol;Acc:VGNC:29700]	GTF2IRD1	-1.49675	1.87572	0.00353458	0.02758		ENSBTAG00000003889	516318	period circadian regulator 1 [Source:VGNC Symbol;Acc:VGNC:32748]	PER1	-1.0203	-1.02114	5.11346	0.00379724	0.0296295
ENSBTAG00000015669	618521	adenosine deaminase tRNA specific 1 [Source:VGNC Symbol;Acc:VGNC:25637]	ADAT1	2.12408	0.987872	0.00355719	0.0277352		ENSBTAG00000017890	616095	zinc finger matrin-type 5 [Source:VGNC Symbol;Acc:VGNC:37194]	ZMAT5	-1.356	-1.35928	3.67771	0.00382006	0.0297797
ENSBTAG00000007450	515440	complement C2 [Source:VGNC Symbol;Acc:VGNC:53959]	C2	-2.25523	2.24302	0.00356355	0.0277635		ENSBTAG00000001161	538649	SIN3-HDAC complex associated factor [Source:VGNC Symbol;Acc:VGNC:34626]	SINHCAF	1.24403	1.24543	4.71407	0.00382234	0.0297797
ENSBTAG00000008299	534581	interleukin 20 receptor subunit beta [Source:VGNC Symbol;Acc:VGNC:30140]	IL20RB	-1.23117	3.40097	0.00358102	0.0278783		ENSBTAG00000013196	511373	serine/threonine kinase 17b [Source:VGNC Symbol;Acc:VGNC:35388]	STK17B	1.47439	1.48231	2.5578	0.00385942	0.0300456
ENSBTAG00000019708	506059	acyl-CoA synthetase long chain family member 6 [Source:VGNC Symbol;Acc:VGNC:55153]	ACSL6	-1.95535	2.54916	0.00359546	0.0279693		ENSBTAG00000000369	538419	epidermal growth factor receptor pathway substrate 8 [Source:VGNC Symbol;Acc:VGNC:28555]	EPS8	-2.01896	-2.0376	2.25459	0.00387502	0.030144
ENSBTAG00000002574	540487	myozenin 2 [Source:VGNC Symbol;Acc:VGNC:31841]	MYOZ2	-4.41711	1.50387	0.00360658	0.0280343		ENSBTAG00000008665	541211	DIX domain containing 1 [Source:VGNC Symbol;Acc:VGNC:28077]	DIXDC1	2.05144	2.10903	0.970001	0.00388304	0.0301833
ENSBTAG00000003935	404134	transmembrane BAX inhibitor motif containing 1 [Source:VGNC Symbol;Acc:VGNC:35915]	TMBIM1	-0.819456	7.64044	0.00364186	0.0282659		ENSBTAG00000021897	515771	beta-1,4-galactosyltransferase 3 [Source:VGNC Symbol;Acc:VGNC:26390]	B4GALT3	-1.04284	-1.04471	4.04342	0.00388861	0.0302035
ENSBTAG00000015169	536181	UBX domain protein 4 [Source:VGNC Symbol;Acc:VGNC:36627]	UBXN4	0.965698	6.89459	0.00364192	0.0282659		ENSBTAG00000001762	100125917	regulatory factor X associated ankyrin containing protein [Source:VGNC Symbol;Acc:VGNC:33900]	RFXANK	-1.06579	-1.06642	5.67254	0.00392123	0.0304336
ENSBTAG00000009223	528453	stratifin [Source:VGNC Symbol;Acc:VGNC:34517]	SFN	-2.03305	1.60653	0.00365809	0.0283697		ENSBTAG00000003261	618599	aurora kinase C [Source:NCBI gene (formerly Entrezgene);Acc:618599]	AURKC	-1.43999	-1.44996	2.2513	0.00392833	0.0304655
ENSBTAG00000055281	100848357	uncharacterized LOC100848357 [Source:NCBI gene (formerly Entrezgene);Acc:100848357]	0	-1.72456	1.68682	0.00368069	0.0285233		ENSBTAG00000013982	281559	uveal autoantigen with coiled-coil domains and ankyrin repeats [Source:VGNC Symbol;Acc:VGNC:36558]	UACA	1.00799	1.0084	6.22299	0.00393317	0.0304798
ENSBTAG00000005039	540421	A-Raf proto-oncogene, serine/threonine kinase [Source:VGNC Symbol;Acc:VGNC:26054]	ARAF	-0.879506	9.83542	0.00369597	0.0286199		ENSBTAG00000001702	509812	transmembrane protein 107 [Source:VGNC Symbol;Acc:VGNC:35947]	TMEM107	1.31471	1.31813	3.64643	0.00398155	0.0308313
ENSBTAG00000047856	513673	p21 (RAC1) activated kinase 2 [Source:VGNC Symbol;Acc:VGNC:53593]	PAK2	0.906027	7.25167	0.00371707	0.0287613		ENSBTAG00000014407	527199	INO80 complex subunit D [Source:VGNC Symbol;Acc:VGNC:30206]	INO80D	1.96104	2.02537	0.943268	0.00401365	0.0310562
ENSBTAG00000053323	100850100	small integral membrane protein 15 [Source:NCBI gene (formerly Entrezgene);Acc:100850100]	0	2.48975	2.13431	0.00372962	0.0288365		ENSBTAG00000040076	614936	interleukin enhancer binding factor 3 [Source:VGNC Symbol;Acc:VGNC:30176]	ILF3	0.958471	0.958936	5.96719	0.00402157	0.0310938
ENSBTAG00000008743	508629	aldehyde dehydrogenase 2 family member [Source:NCBI gene (formerly Entrezgene);Acc:508629]	ALDH2	-1.00185	5.84707	0.00375415	0.0290042		ENSBTAG00000019471	508912	cornichon family AMPA receptor auxiliary protein 4 [Source:VGNC Symbol;Acc:VGNC:27504]	CNIH4	-0.945311	-0.945376	8.52412	0.00403144	0.0311381
ENSBTAG00000002078	512622	lysine demethylase 4A [Source:VGNC Symbol;Acc:VGNC:30527]	KDM4A	1.51063	1.45707	0.00375831	0.0290142		ENSBTAG00000007476	534072	beta-transducin repeat containing E3 ubiquitin protein ligase [Source:VGNC Symbol;Acc:VGNC:26603]	BTRC	-1.23159	-1.23664	3.22951	0.00403341	0.0311381
ENSBTAG00000038173	#N/A	#N/A	#N/A	1.62268	1.48577	0.00376219	0.0290222		ENSBTAG00000053050	514205	sterile alpha motif domain containing 9 [Source:NCBI gene (formerly Entrezgene);Acc:514205]	SAMD9	1.93336	1.95499	1.87113	0.00410148	0.0316395
ENSBTAG00000006529	509696	decaprenyl diphosphate synthase subunit 1 [Source:VGNC Symbol;Acc:VGNC:32719]	PDSS1	1.19452	3.84525	0.00377024	0.0290623		ENSBTAG00000014553	282148	ATPase H+ transporting V0 subunit d1 [Source:VGNC Symbol;Acc:VGNC:26312]	ATP6V0D1	-1.01437	-1.01475	6.3806	0.00410888	0.0316726
ENSBTAG00000020173	507329	inositol polyphosphate-5-phosphatase D [Source:VGNC Symbol;Acc:VGNC:30212]	INPP5D	-1.81448	2.17239	0.00378834	0.0291797		ENSBTAG00000003806	524222	extracellular matrix protein 1 [Source:VGNC Symbol;Acc:VGNC:28311]	ECM1	-1.80886	-1.83201	1.52347	0.00416379	0.0320109
ENSBTAG00000040435	#N/A	0	0	-0.997816	6.3584	0.00379871	0.0292374		ENSBTAG00000000308	508431	itchy E3 ubiquitin protein ligase [Source:VGNC Symbol;Acc:VGNC:30307]	ITCH	1.82753	1.85076	1.74895	0.00416568	0.0320109
ENSBTAG00000046587	503685	cystatin E/M [Source:NCBI gene (formerly Entrezgene);Acc:503685]	CST6	-1.15679	5.67461	0.00382129	0.0293677		ENSBTAG00000014731	281181	glyceraldehyde-3-phosphate dehydrogenase [Source:VGNC Symbol;Acc:VGNC:97273]	GAPDH	-1.02724	-1.02726	10.5623	0.00416584	0.0320109
ENSBTAG00000020432	767858	MIS12 kinetochore complex component [Source:VGNC Symbol;Acc:VGNC:31484]	MIS12	1.25466	4.5392	0.00382141	0.0293677		ENSBTAG00000020911	100336530	formin binding protein 4 [Source:VGNC Symbol;Acc:VGNC:54870]	FNBP4	1.07108	1.07196	5.12741	0.0041659	0.0320109
ENSBTAG00000018732	515590	heat shock protein family A (Hsp70) member 12B [Source:NCBI gene (formerly Entrezgene);Acc:515590]	HSPA12B	-3.67991	1.89323	0.00383308	0.0294352		ENSBTAG00000054533	286850	G protein subunit gamma 12 [Source:NCBI gene (formerly Entrezgene);Acc:286850]	GNG12	1.14729	1.15043	3.52805	0.00416854	0.0320109
ENSBTAG00000016944	#N/A	#N/A	#N/A	-2.14208	1.73415	0.00383633	0.0294379		ENSBTAG00000006388	533064	F-box protein 45 [Source:VGNC Symbol;Acc:VGNC:28915]	FBXO45	1.32923	1.332	3.76519	0.00417164	0.0320109
ENSBTAG00000047147	516526	crystallin beta-gamma domain containing 3 [Source:NCBI gene (formerly Entrezgene);Acc:516526]	CRYBG3	1.77582	1.67046	0.00384966	0.0295179		ENSBTAG00000008008	281534	toll like receptor 2 [Source:VGNC Symbol;Acc:VGNC:49982]	TLR2	-1.2634	-1.26694	3.29653	0.00421462	0.0323163
ENSBTAG00000016764	282869	ubiquitin like modifier activating enzyme 1 [Source:VGNC Symbol;Acc:VGNC:36561]	UBA1	-0.933201	8.27877	0.00385424	0.0295308		ENSBTAG00000021202	514788	acyl-CoA thioesterase 7 [Source:NCBI gene (formerly Entrezgene);Acc:514788]	ACOT7	-0.938821	-0.939118	6.50433	0.00424093	0.0324883
ENSBTAG00000024162	617307	solute carrier family 19 member 1 [Source:VGNC Symbol;Acc:VGNC:34709]	SLC19A1	-1.09714	4.70049	0.00387821	0.0296921		ENSBTAG00000008204	538441	carnosine N-methyltransferase 1 [Source:VGNC Symbol;Acc:VGNC:26771]	CARNMT1	1.59132	1.60029	2.54041	0.00424344	0.0324883
ENSBTAG00000012816	#N/A	0	0	1.74629	2.38316	0.00389024	0.0297618		ENSBTAG00000014676	615958	shroom family member 1 [Source:VGNC Symbol;Acc:VGNC:34608]	SHROOM1	-1.07424	-1.0768	3.84499	0.0042563	0.0325623
ENSBTAG00000003455	516065	ankyrin repeat domain 6 [Source:VGNC Symbol;Acc:VGNC:53781]	ANKRD6	-1.21329	3.22505	0.00389541	0.029779		ENSBTAG00000008288	533620	ankyrin repeat domain 26 [Source:NCBI gene (formerly Entrezgene);Acc:533620]	ANKRD26	1.0001	1.00146	4.46384	0.00426359	0.0325935
ENSBTAG00000005275	404169	cAMP-dependent protein kinase inhibitor gamma [Source:VGNC Symbol;Acc:VGNC:32942]	PKIG	-1.6702	3.15487	0.00392857	0.0299958		ENSBTAG00000019275	616784	INTS3 and NABP interacting protein [Source:VGNC Symbol;Acc:VGNC:30204]	INIP	1.92892	1.93999	2.64162	0.00427125	0.0326276
ENSBTAG00000012120	540975	TCDD inducible poly(ADP-ribose) polymerase [Source:VGNC Symbol;Acc:VGNC:53609]	TIPARP	1.21492	5.44263	0.00392967	0.0299958		ENSBTAG00000010277	#N/A	#N/A	#N/A	2.50432	2.57545	1.11353	0.00429116	0.0327551
ENSBTAG00000017761	282370	structural maintenance of chromosomes 1A [Source:VGNC Symbol;Acc:VGNC:34997]	SMC1A	1.00416	7.47959	0.00394591	0.0300971		ENSBTAG00000011543	613842	programmed cell death 1 [Source:VGNC Symbol;Acc:VGNC:32657]	PDCD1	-2.25696	-2.26405	3.8004	0.00430026	0.0327737
ENSBTAG00000013909	512018	BOC cell adhesion associated, oncogene regulated [Source:VGNC Symbol;Acc:VGNC:26536]	BOC	-2.46523	1.4874	0.00396489	0.0302193		ENSBTAG00000011969	516099	heat shock protein family B (small) member 1 [Source:NCBI gene (formerly Entrezgene);Acc:516099]	HSPB1	-0.867513	-0.867521	11.6964	0.00430278	0.0327737
ENSBTAG00000007371	535352	secretory carrier membrane protein 1 [Source:VGNC Symbol;Acc:VGNC:34315]	SCAMP1	1.79729	2.19745	0.00398892	0.0303797		ENSBTAG00000016213	100141142	synaptonemal complex central element protein 2 [Source:VGNC Symbol;Acc:VGNC:35505]	SYCE2	-2.1093	-2.15868	1.17796	0.00430642	0.0327737
ENSBTAG00000027764	506056	EP300 interacting inhibitor of differentiation 1 [Source:NCBI gene (formerly Entrezgene);Acc:506056]	EID1	0.963947	6.11121	0.00401356	0.0305445		ENSBTAG00000026461	282412	calcium voltage-gated channel subunit alpha1 H [Source:VGNC Symbol;Acc:VGNC:26678]	CACNA1H	-2.6382	-2.69186	1.49604	0.00430648	0.0327737
ENSBTAG00000007120	539295	ADP ribosylation factor guanine nucleotide exchange factor 2 [Source:VGNC Symbol;Acc:VGNC:26065]	ARFGEF2	0.985944	5.24886	0.00403148	0.0306579		ENSBTAG00000031609	508969	THAP domain containing 12 [Source:VGNC Symbol;Acc:VGNC:35820]	THAP12	1.86594	1.88719	1.73447	0.00432266	0.0328722
ENSBTAG00000047450	100295193	SWI5 dependent homologous recombination repair protein 1 [Source:VGNC Symbol;Acc:VGNC:34519]	SFR1	2.45786	0.842844	0.00403501	0.0306618		ENSBTAG00000004532	532881	FGFR1 oncogene partner 2 [Source:VGNC Symbol;Acc:VGNC:28986]	FGFR1OP2	1.62963	1.63584	3.05396	0.00434285	0.0329882
ENSBTAG00000051267	#N/A	CASP2 and RIPK1 domain containing adaptor with death domain [Source:HGNC Symbol;Acc:HGNC:2340]	CRADD	-1.78479	2.01624	0.00407558	0.0309264		ENSBTAG00000048631	536517	TIAM Rac1 associated GEF 1 [Source:NCBI gene (formerly Entrezgene);Acc:536517]	0	-2.62735	-2.71212	1.55455	0.00434439	0.0329882
ENSBTAG00000019465	534051	inositol-trisphosphate 3-kinase C [Source:VGNC Symbol;Acc:VGNC:30345]	ITPKC	-1.04076	4.06412	0.0040759	0.0309264		ENSBTAG00000050728	#N/A	#N/A	#N/A	1.79828	1.82402	1.5791	0.00435208	0.0330219
ENSBTAG00000021945	521854	nidogen 2 [Source:VGNC Symbol;Acc:VGNC:32074]	NID2	1.02286	7.58922	0.00408812	0.0309733		ENSBTAG00000013485	511054	zinc finger FYVE-type containing 19 [Source:VGNC Symbol;Acc:VGNC:37175]	ZFYVE19	-1.29696	-1.30529	2.47875	0.00436092	0.0330643
ENSBTAG00000037456	522105	AT-hook DNA binding motif containing 1 [Source:VGNC Symbol;Acc:VGNC:25753]	AHDC1	-1.13326	6.12341	0.00408817	0.0309733		ENSBTAG00000004426	538849	DnaJ heat shock protein family (Hsp40) member B14 [Source:VGNC Symbol;Acc:VGNC:53699]	DNAJB14	1.04074	1.0425	4.06304	0.00436891	0.0331003
ENSBTAG00000003548	#N/A	#N/A	#N/A	-3.47409	2.66489	0.00411816	0.0311773		ENSBTAG00000002646	526329	dynein cytoplasmic 1 intermediate chain 2 [Source:VGNC Symbol;Acc:VGNC:28271]	DYNC1I2	0.844434	0.844524	8.11916	0.00439714	0.0332884
ENSBTAG00000006197	535814	zinc finger DHHC-type palmitoyltransferase 21 [Source:VGNC Symbol;Acc:VGNC:37137]	ZDHHC21	1.11993	3.86845	0.0041501	0.0313936		ENSBTAG00000007450	515440	complement C2 [Source:VGNC Symbol;Acc:VGNC:53959]	C2	-2.05477	-2.07116	2.24302	0.00440028	0.0332884
ENSBTAG00000016267	281035	serpin family G member 1 [Source:VGNC Symbol;Acc:VGNC:54891]	SERPING1	-1.66249	2.23186	0.0041529	0.0313936		ENSBTAG00000000392	534915	activating signal cointegrator 1 complex subunit 1 [Source:VGNC Symbol;Acc:VGNC:26203]	ASCC1	-1.14496	-1.14793	3.78785	0.00440601	0.0333069
ENSBTAG00000007208	519899	histone deacetylase 11 [Source:VGNC Symbol;Acc:VGNC:49150]	HDAC11	-1.26805	3.57341	0.00419755	0.0317075		ENSBTAG00000021316	317711	collagen type IV alpha 3 chain [Source:VGNC Symbol;Acc:VGNC:55339]	COL4A3	2.11994	2.15364	1.15121	0.00442997	0.0334632
ENSBTAG00000000245	517882	NHS like 1 [Source:VGNC Symbol;Acc:VGNC:32072]	NHSL1	1.5415	2.99398	0.0042094	0.0317735		ENSBTAG00000018894	506518	peroxisomal biogenesis factor 11 gamma [Source:VGNC Symbol;Acc:VGNC:32753]	PEX11G	-0.897979	-0.89855	5.43376	0.00446473	0.0337008
ENSBTAG00000016378	515494	LDL receptor related protein 10 [Source:VGNC Symbol;Acc:VGNC:30987]	LRP10	-0.891429	7.16749	0.00421942	0.0318255		ENSBTAG00000020279	504346	ALG9 alpha-1,2-mannosyltransferase [Source:NCBI gene (formerly Entrezgene);Acc:504346]	0	-1.22049	-1.22352	3.82816	0.00446956	0.0337122
ENSBTAG00000019187	515561	zinc finger protein 462 [Source:VGNC Symbol;Acc:VGNC:37280]	ZNF462	1.21005	4.51349	0.00424533	0.0319972		ENSBTAG00000005481	282132	ADAM metallopeptidase domain 10 [Source:VGNC Symbol;Acc:VGNC:25604]	ADAM10	0.98983	0.990137	6.67774	0.00447415	0.0337218
ENSBTAG00000032591	538634	collagen triple helix repeat containing 1 [Source:VGNC Symbol;Acc:VGNC:27796]	CTHRC1	1.06289	5.00592	0.00427628	0.0322066		ENSBTAG00000015116	540564	RAD23 homolog A, nucleotide excision repair protein [Source:VGNC Symbol;Acc:VGNC:33682]	RAD23A	-0.856623	-0.856748	7.58118	0.00449168	0.0338289
ENSBTAG00000051947	615626	prothymosin, alpha (gene sequence 28) [Source:NCBI gene (formerly Entrezgene);Acc:615626]	PTMA	1.29005	3.50509	0.00428666	0.0322436		ENSBTAG00000014267	528171	zinc finger CCHC-type containing 14 [Source:VGNC Symbol;Acc:VGNC:37118]	ZCCHC14	1.81184	1.84314	1.40752	0.00452662	0.0340668
ENSBTAG00000004283	407130	PPFIA binding protein 1 [Source:VGNC Symbol;Acc:VGNC:33193]	PPFIBP1	0.881922	6.43859	0.00428753	0.0322436		ENSBTAG00000023784	767837	transmembrane protein 88B [Source:VGNC Symbol;Acc:VGNC:36121]	TMEM88B	-1.47409	-1.49618	1.27916	0.00453278	0.034088
ENSBTAG00000010351	533174	sorting nexin 25 [Source:VGNC Symbol;Acc:VGNC:35104]	SNX25	-0.991595	6.20476	0.0042979	0.0322791		ENSBTAG00000048029	281308	matrix metallopeptidase 1 (interstitial collagenase) [Source:NCBI gene (formerly Entrezgene);Acc:281308]	MMP1	-1.73109	-1.73234	5.0796	0.00453835	0.0341047
ENSBTAG00000019163	523966	cytochrome b-561 domain containing 2 [Source:NCBI gene (formerly Entrezgene);Acc:523966]	CYB561D2	-1.03078	4.7478	0.00429859	0.0322791		ENSBTAG00000010718	789713	Ral GEF with PH domain and SH3 binding motif 2 [Source:VGNC Symbol;Acc:VGNC:33705]	RALGPS2	1.13843	1.1424	3.19306	0.0045504	0.03417
ENSBTAG00000032839	786557	leucine rich repeats and calponin homology domain containing 3 [Source:VGNC Symbol;Acc:VGNC:30973]	LRCH3	1.87364	1.46706	0.00430485	0.0323022		ENSBTAG00000018314	511672	mediator complex subunit 11 [Source:VGNC Symbol;Acc:VGNC:31348]	MED11	-1.02242	-1.02489	3.67345	0.00458899	0.0344219
ENSBTAG00000020122	519992	ubiquitin specific peptidase 16 [Source:VGNC Symbol;Acc:VGNC:52842]	USP16	0.952559	6.614	0.0043166	0.0323665		ENSBTAG00000010907	767949	protein phosphatase 1 regulatory inhibitor subunit 1A [Source:VGNC Symbol;Acc:VGNC:54472]	PPP1R1A	-1.28554	-1.28775	3.98302	0.00459072	0.0344219
ENSBTAG00000003072	282130	acyl-CoA dehydrogenase very long chain [Source:VGNC Symbol;Acc:VGNC:50246]	ACADVL	-0.870796	7.25179	0.00434432	0.0325504		ENSBTAG00000045664	337889	leucine rich repeat containing 41 [Source:NCBI gene (formerly Entrezgene);Acc:337889]	LRRC41	-1.06722	-1.06759	6.21009	0.00459676	0.0344419
ENSBTAG00000018033	533289	phosphatidylinositol-5-phosphate 4-kinase type 2 alpha [Source:VGNC Symbol;Acc:VGNC:32906]	PIP4K2A	1.40339	3.5603	0.00434866	0.032559		ENSBTAG00000015950	516212	isochorismatase domain containing 2 [Source:VGNC Symbol;Acc:VGNC:30302]	ISOC2	-1.41919	-1.42298	3.42107	0.00460335	0.034445
ENSBTAG00000009486	512135	transmembrane protein 179B [Source:VGNC Symbol;Acc:VGNC:36005]	TMEM179B	-0.96426	5.51779	0.00436716	0.0326734		ENSBTAG00000010532	508582	potassium channel tetramerization domain containing 11 [Source:VGNC Symbol;Acc:VGNC:30501]	KCTD11	-0.809655	-0.809779	7.35589	0.00460395	0.034445
ENSBTAG00000004510	614603	sarcosine dehydrogenase [Source:VGNC Symbol;Acc:VGNC:34289]	SARDH	-1.61311	3.79532	0.00437239	0.0326885		ENSBTAG00000016805	520954	sphingomyelin synthase 2 [Source:VGNC Symbol;Acc:VGNC:34544]	SGMS2	1.33099	1.33655	2.74061	0.00462743	0.0345952
ENSBTAG00000004587	515310	dual specificity phosphatase 6 [Source:VGNC Symbol;Acc:VGNC:28262]	DUSP6	1.00059	7.47317	0.00440134	0.0328798		ENSBTAG00000017128	513270	nucleoporin 153 [Source:VGNC Symbol;Acc:VGNC:50235]	NUP153	1.43056	1.43225	4.76389	0.00463989	0.0346629
ENSBTAG00000019193	532578	SET domain containing 5 [Source:VGNC Symbol;Acc:VGNC:52826]	SETD5	0.971345	5.62401	0.00440444	0.0328798		ENSBTAG00000017622	617931	SIVA1 apoptosis inducing factor [Source:VGNC Symbol;Acc:VGNC:34638]	SIVA1	-1.09825	-1.09949	4.80985	0.004657	0.0347652
ENSBTAG00000011381	#N/A	#N/A	#N/A	-1.99816	0.851321	0.00440835	0.0328848		ENSBTAG00000020616	513389	diacylglycerol kinase delta [Source:VGNC Symbol;Acc:VGNC:28026]	DGKD	-1.03497	-1.03588	5.04309	0.00467292	0.034846
ENSBTAG00000011059	505691	cyclin dependent kinase inhibitor 2C [Source:VGNC Symbol;Acc:VGNC:27146]	CDKN2C	-0.86898	6.88353	0.00441648	0.0329214		ENSBTAG00000001844	516155	mannosyl-oligosaccharide glucosidase [Source:VGNC Symbol;Acc:VGNC:58390]	MOGS	-1.00393	-1.00504	4.75239	0.00467468	0.034846
ENSBTAG00000005542	535998	epidermal growth factor receptor pathway substrate 15 [Source:VGNC Symbol;Acc:VGNC:28553]	EPS15	1.42339	2.64578	0.00442391	0.0329526		ENSBTAG00000013602	540661	bromodomain and WD repeat domain containing 1 [Source:VGNC Symbol;Acc:VGNC:26575]	BRWD1	0.95058	0.951045	5.94135	0.00469283	0.0349557
ENSBTAG00000013769	534360	nectin cell adhesion molecule 3 [Source:NCBI gene (formerly Entrezgene);Acc:534360]	NECTIN3	1.16934	4.7585	0.00442964	0.0329681		ENSBTAG00000037488	539736	JRK like [Source:VGNC Symbol;Acc:VGNC:30385]	JRKL	1.58116	1.5889	2.68787	0.00475695	0.0354046
ENSBTAG00000001000	513850	carbonic anhydrase 13 [Source:VGNC Symbol;Acc:VGNC:26651]	CA13	-6.85303	0.674774	0.00443246	0.0329681		ENSBTAG00000004570	540901	paired related homeobox 1 [Source:VGNC Symbol;Acc:VGNC:33412]	PRRX1	1.61592	1.6186	4.51804	0.00476005	0.0354046
ENSBTAG00000001898	509840	coiled-coil domain containing 112 [Source:VGNC Symbol;Acc:VGNC:26834]	CCDC112	1.0526	4.69826	0.00445287	0.0330957		ENSBTAG00000001857	618756	docking protein 4 [Source:VGNC Symbol;Acc:VGNC:28168]	DOK4	-0.970165	-0.971058	5.12031	0.00477314	0.035476
ENSBTAG00000005547	540184	valosin containing protein lysine methyltransferase [Source:VGNC Symbol;Acc:VGNC:36781]	VCPKMT	1.67514	1.77092	0.00446301	0.0331384		ENSBTAG00000008734	513852	peptidase M20 domain containing 1 [Source:VGNC Symbol;Acc:VGNC:33066]	PM20D1	-1.00676	-1.00852	4.15055	0.00478796	0.0355602
ENSBTAG00000046744	527118	paralemmin 3 [Source:VGNC Symbol;Acc:VGNC:32559]	PALM3	1.54287	3.74793	0.00446832	0.0331384		ENSBTAG00000008896	512327	DEAH-box helicase 15 [Source:VGNC Symbol;Acc:VGNC:28048]	DHX15	1.47377	1.48475	2.1936	0.00479343	0.0355748
ENSBTAG00000032223	504790	component of oligomeric golgi complex 7 [Source:VGNC Symbol;Acc:VGNC:27551]	COG7	-1.04405	4.56536	0.00446839	0.0331384		ENSBTAG00000008863	615333	transmembrane protein 87A [Source:VGNC Symbol;Acc:VGNC:36118]	TMEM87A	1.70907	1.71613	3.1508	0.00481294	0.0356936
ENSBTAG00000001987	533720	switching B cell complex subunit SWAP70 [Source:VGNC Symbol;Acc:VGNC:54893]	SWAP70	0.865653	7.09008	0.00448417	0.0332312		ENSBTAG00000018496	540765	translocase of inner mitochondrial membrane 17B [Source:VGNC Symbol;Acc:VGNC:49573]	TIMM17B	-1.03102	-1.03187	5.07752	0.00484526	0.0359072
ENSBTAG00000011593	493722	QKI, KH domain containing RNA binding [Source:VGNC Symbol;Acc:VGNC:33597]	QKI	2.08726	1.55389	0.00450068	0.0333293		ENSBTAG00000019309	#N/A	0	0	1.61574	1.63378	1.80055	0.00485887	0.0359671
ENSBTAG00000007447	531462	nudix hydrolase 4 [Source:NCBI gene (formerly Entrezgene);Acc:614183]	NUDT4	1.0798	5.21458	0.0045044	0.0333326		ENSBTAG00000012849	282191	collagen type IV alpha 1 chain [Source:VGNC Symbol;Acc:VGNC:50081]	COL4A1	1.15279	1.15302	7.36896	0.00486042	0.0359671
ENSBTAG00000027789	783720	peptidylprolyl isomerase G [Source:VGNC Symbol;Acc:VGNC:33199]	PPIG	0.893284	8.04811	0.00451449	0.033383		ENSBTAG00000030960	535430	DnaJ heat shock protein family (Hsp40) member C25 [Source:VGNC Symbol;Acc:VGNC:56946]	DNAJC25	1.02593	1.02658	5.43654	0.0048712	0.0360207
ENSBTAG00000008271	510187	mesenteric estrogen dependent adipogenesis [Source:VGNC Symbol;Acc:VGNC:31371]	MEDAG	-1.13411	4.43409	0.00453945	0.0335431		ENSBTAG00000019784	533617	protein phosphatase 2 regulatory subunit B'epsilon [Source:VGNC Symbol;Acc:VGNC:33264]	PPP2R5E	1.11105	1.11193	5.31871	0.00488369	0.0360868
ENSBTAG00000001842	615507	glutathione S-transferase mu 3 [Source:VGNC Symbol;Acc:VGNC:29686]	GSTM3	-1.06688	3.6146	0.0045547	0.0336314		ENSBTAG00000013177	511790	apurinic/apyrimidinic endodeoxyribonuclease 2 [Source:VGNC Symbol;Acc:VGNC:26012]	APEX2	-1.1026	-1.10653	3.18649	0.00489782	0.0361649
[truncated: 143 more rows]

## Sheet: CYP3A74 KO vs CTL_Table1b
Supplementary Table 1b Differential expression analysis. The table reports the list of DEGs for the test CYP3A74 KO vs CTL upon AFB1 exposure. For each DEG, Ensembl ID, Entrez ID, gene description, gene name, log2 fold change (logFC), mean log count per millions (logCPM), nominal P value and false discovery rate (FDR) are reported.
[truncated: 255 more rows]
